# Supplementary material for: Meta-analysis of GWAS of over 16,000 individuals with autism spectrum disorder highlights a novel locus at 10q24.32 and a significant overlap with schizophrenia
Source: Mol Autism. 2017 May 22;8:21. doi: 10.1186/s13229-017-0137-9 (PMC5441062; doi:10.1186/s13229-017-0137-9)
Supplement: Supplementary file 2 — Summary GWAS finding for ASD Meta-analysis (World-wide Ancestries); Data reported on P < 10E-4. (XLS 99 KB) [file 13229_2017_137_MOESM2_ESM.xls]

## Sheet: Association Findings (P<1e-4)
SNP	MARKER LOCATION	ALLELE (GT; FRQ_A:FRQ_U)	ODDS RATIO (95%CI)	P-VALUE	INFO SCORE	DIRECTION OF META	HETEROGENEITY	ASSOCIATED REGION (CLUMP)	GENES IN REGION	GWAS_CATALOG	EQTL_LCL	EQTL_CNS
rs142968358	chr6:23819235	T (T:G;0.563:0.533)	1.13 (1.08-1.19)	2.315e-07	0.909	+++++++++++-+-	0.00 (CHI2 = 8.77; DF = 1; P=0.790)	chr6:23671847..23905645	NONE	NONE	(cis)ALDH5A1 (trans)BEX4 (trans)LGALS14	NONE
rs7835763	chr8:119094919	A (A:T;0.794:0.768)	1.15 (1.09-1.22)	2.94e-07	0.999	++++++++++-+-+	28.5 (CHI2 = 18.1; DF = 1; P=0.151)	chr8:119093994..119128220	EXT1	NONE	NONE	NONE
rs115254791	chr6:29910457	T (T:G;0.386:0.412)	0.86 (0.81-0.91)	3.178e-07	0.684	------+-+-----	27.2 (CHI2 = 17.8; DF = 1; P=0.163)	chr6:29806901..29923941	HCG4B HLA-A HLA-H	NONE	(cis)GABBR1 (cis)HCG4P6 (cis)HLA-A (cis)HLA-G (cis)HLA-H (cis)HLA-J (cis)HLA-L (cis)ZFP57 (cis)ZNRD1 (trans)ADAMDEC1 (trans)ENTHD1 (trans)GLUL (trans)RAI14 (trans)TBC1D30	(cis)HLA-A (trans)HLA-A
rs7762549	chr6:46114601	A (A:G;0.387:0.411)	0.89 (0.85-0.93)	3.282e-07	1	+--------+---+	23.4 (CHI2 = 16.9; DF = 1; P=0.201)	chr6:46044196..46150542	CLIC5 ENPP4 ENPP5	NONE	(cis)ENPP4 (cis)SUPT3H (trans)OXTR (trans)PTPRK	(cis)ENPP5
rs9285005	chr5:163586122	A (A:G;0.120:0.137)	0.82 (0.76-0.89)	6.394e-07	0.771	-------------+	20.8 (CHI2 = 16.4; DF = 1; P=0.228)	chr5:163549613..163644335	NONE	NONE	(trans)MSL3	NONE
chr8_94389815_I	chr8:94389815	I5 (I5:D;0.279:0.250)	1.14 (1.08-1.20)	9.468e-07	0.944	---------+----	0.00 (CHI2 = 8.69; DF = 1; P=0.796)	chr8:94305482..94583653	LINC00535	NONE	(trans)FOXN4 (trans)PRR21 (trans)RASIP1	NONE
rs2756174	chr6:43257234	A (A:C;0.309:0.333)	0.88 (0.84-0.93)	1.131e-06	0.96	---+---------+	0.00 (CHI2 = 8.92; DF = 1; P=0.778)	chr6:43229211..43258464	TTBK1	NONE	(trans)NDN	NONE
rs6467494	chr7:133175040	T (T:C;0.508:0.483)	1.12 (1.07-1.17)	1.425e-06	0.999	++++++++++++++	0.00 (CHI2 = 7.99; DF = 1; P=0.844)	chr7:133070492..133297858	EXOC4	NONE	(trans)FGFBP2	NONE
rs7952100	chr11:132936734	C (C:G;0.246:0.229)	1.14 (1.08-1.20)	2.487e-06	0.959	++++++-+++++++	23.7 (CHI2 = 17.0; DF = 1; P=0.198)	chr11:132912844..132936734	OPCML	NONE	(cis)SPATA19 (trans)IGSF3	NONE
rs138457704	chr16:8010616	A (A:G;0.196:0.174)	1.16 (1.09-1.24)	2.774e-06	0.864	++++++++++++--	5.50 (CHI2 = 13.7; DF = 1; P=0.391)	chr16:7964385..8021944	NONE	NONE	NONE	NONE
rs72767788	chr9:124971170	A (A:C;0.838:0.851)	0.85 (0.80-0.91)	3.12e-06	0.91	--------------	0.00 (CHI2 = 5.49; DF = 1; P=0.963)	chr9:124971170..124974419	LHX6	NONE	NONE	NONE
rs10947543	chr6:11751130	C (C:G;0.371:0.398)	0.89 (0.85-0.94)	3.251e-06	0.974	-----+-------+	0.00 (CHI2 = 12.3; DF = 1; P=0.495)	chr6:11712240..11774626	ADTRP	[Beaty TH et al., PMID:21618603	(cis)C6orf105	(trans)ADAL (trans)ALPP (trans)C14orf126 (trans)C2CD4B (trans)C6orf170 (trans)CSF3 (trans)CYP4F3 (trans)DENND4C (trans)GNB4 (trans)MCART1 (trans)MED23 (trans)METTL2B (trans)RSAD2 (trans)SLC14A1 (trans)SLC5A8 (trans)SPC24 (trans)SRD5A3 (trans)TMEM156 (trans)ZNF568
rs16975940	chr16:26527044	T (T:C;0.804:0.783)	1.14 (1.08-1.21)	3.339e-06	0.981	+++++++-+-++++	0.00 (CHI2 = 8.97; DF = 1; P=0.775)	chr16:26526677..26530797	NONE	NONE	(trans)NGFRAP1 (trans)UTS2	NONE
chr18_76035713_D	chr18:76035713	D (D:I10;0.226:0.243)	0.85 (0.80-0.91)	3.606e-06	0.624	-------------+	10.9 (CHI2 = 14.5; DF = 1; P=0.334)	chr18:76035713..76035713	NONE	NONE	NONE	NONE
rs73204738	chr13:70906470	A (A:C;0.886:0.901)	0.84 (0.78-0.90)	3.69e-06	0.993	----------+---	0.00 (CHI2 = 7.02; DF = 1; P=0.901)	chr13:70895897..70994536	NONE	NONE	NONE	NONE
rs7026354	chr9:119184126	A (A:G;0.457:0.442)	1.11 (1.06-1.16)	3.736e-06	1.02	-++++++++++-+-	30.7 (CHI2 = 18.7; DF = 1; P=0.131)	chr9:119138164..119254725	ASTN2 PAPPA PAPPA-AS1	[Anttila V et al., PMID:23793025 [Freilinger T et al., PMID:22683712	(trans)EVPLL (trans)FOXG1 (trans)MIR1229	(trans)CRX (trans)CXCL2 (trans)ENO3 (trans)GUCA1C (trans)LRTM1 (trans)SH2D2A (trans)SLC5A7 (trans)TTR
rs261351	chr20:5041677	T (T:C;0.288:0.304)	0.88 (0.84-0.93)	4.546e-06	0.862	+-----+-------	5.90 (CHI2 = 13.8; DF = 1; P=0.387)	chr20:5029207..5042089	NONE	NONE	NONE	NONE
rs73065342	chr3:180000682	T (T:C;0.920:0.936)	0.82 (0.75-0.89)	4.647e-06	1.01	--------------	0.00 (CHI2 = 4.27; DF = 1; P=0.988)	chr3:179820592..180292831	LOC100505609	NONE	(cis)USP13 (trans)CYB5R2 (trans)LPHN2	(trans)AMICA1 (trans)ARAP3 (trans)ARHGAP4 (trans)BARHL1 (trans)CD247 (trans)CHAD (trans)DGKD (trans)ESPNL (trans)GRM4 (trans)LYPD5 (trans)MORN1 (trans)MTNR1A (trans)PCP2 (trans)SCGN (trans)SEPT12 (trans)TMEM52 (trans)TNXB
rs180861134	chr9:23759787	A (A:T;0.165:0.155)	1.16 (1.09-1.24)	4.721e-06	0.922	+++++---++++++	25.7 (CHI2 = 17.5; DF = 1; P=0.177)	chr9:23735995..23849297	ELAVL2	NONE	(trans)ARHGAP32 (trans)SLC4A4	NONE
rs73031119	chr5:1112994	A (A:C;0.070:0.079)	0.79 (0.72-0.88)	5.099e-06	0.803	-----+----+---	0.00 (CHI2 = 9.30; DF = 1; P=0.750)	chr5:1099300..1115398	SLC12A7	[Kamatani Y et al., PMID:20139978	(cis)SLC12A7	NONE
rs78092981	chr3:153834394	A (A:C;0.776:0.802)	0.88 (0.83-0.93)	5.166e-06	0.948	----------+++-	3.80 (CHI2 = 13.5; DF = 1; P=0.409)	chr3:153587256..154052126	ARHGEF26 ARHGEF26-AS1 DHX36	NONE	(cis)DHX36 (trans)DHRS9 (trans)FYN (trans)LOC285740 (trans)RAB31	(trans)ADAMTSL2
rs192259652	chr20:14842867	A (A:T;0.836:0.847)	0.84 (0.78-0.91)	5.343e-06	0.722	-----+-----+-+	31.2 (CHI2 = 18.9; DF = 1; P=0.126)	chr20:14842867..14842867	MACROD2	NONE	NONE	NONE
rs4840484	chr8:10297049	T (T:C;0.738:0.713)	1.13 (1.07-1.19)	5.416e-06	0.973	+++++-+++-++++	0.00 (CHI2 = 5.59; DF = 1; P=0.960)	chr8:10288007..10419340	LINCR-0001 PRSS55	NONE	(cis)BLK (trans)KDM5D	NONE
rs2055471	chr12:101280123	A (A:T;0.283:0.258)	1.12 (1.07-1.18)	6.157e-06	1	+++++--+++++-+	30.8 (CHI2 = 18.7; DF = 1; P=0.130)	chr12:101279586..101373845	ANO4	NONE	(cis)DRAM1 (cis)GNPTAB	(trans)HYI (trans)WSCD1
rs66847009	chr12:3982482	T (T:C;0.079:0.095)	0.83 (0.76-0.90)	7.261e-06	0.93	------------+-	0.50 (CHI2 = 13.0; DF = 1; P=0.443)	chr12:3890095..3987881	PARP11	NONE	(cis)C12orf5 (cis)PARP11 (trans)SH2D1A (trans)TPM2	NONE
chr5_57079215_I	chr5:57079215	D (D:I3;0.177:0.158)	1.15 (1.08-1.22)	8.18e-06	0.991	+++++-++++++++	0.00 (CHI2 = 6.58; DF = 1; P=0.922)	chr5:56944366..57199879	LOC101928505 LOC101928539	[Horikoshi M et al., PMID:23202124	(trans)CCL1 (trans)CNTN6	(trans)PTDSS1
rs17629195	chr5:153676502	T (T:C;0.352:0.336)	1.11 (1.06-1.17)	9.792e-06	0.986	+++-++-++++++-	30.7 (CHI2 = 18.7; DF = 1; P=0.131)	chr5:153573938..153690010	GALNT10	[Ripke S et al., PMID:25056061	(cis)GALNT10	NONE
rs7860276	chr9:16874141	A (A:G;0.108:0.091)	1.18 (1.10-1.28)	1.175e-05	0.987	-+++++++++--++	13.9 (CHI2 = 15.0; DF = 1; P=0.302)	chr9:16841213..16910872	BNC2	[Eriksson N et al., PMID:20585627	(trans)TBC1D8	NONE
rs35675874	chr6:89536563	A (A:G;0.661:0.682)	0.88 (0.84-0.93)	1.224e-05	0.767	-----+------++	0.00 (CHI2 = 12.2; DF = 1; P=0.511)	chr6:89388023..89633046	RNGTT	NONE	(cis)CNR1 (cis)RNGTT (trans)CD83 (trans)IL16 (trans)SIX3 (trans)SNORD63	NONE
chr6_45726254_D	chr6:45726254	D (D:I6;0.060:0.070)	0.81 (0.73-0.89)	1.226e-05	0.924	+------+-----+	17.9 (CHI2 = 15.8; DF = 1; P=0.258)	chr6:45726254..45761884	NONE	NONE	NONE	(trans)APOC1 (trans)CD44 (trans)CHI3L2 (trans)DYNLT1 (trans)FCGBP (trans)MGST1 (trans)OXTR (trans)PIR (trans)SERPINA1 (trans)SERPINA3 (trans)SOD2 (trans)TMBIM1 (trans)TPST1
rs3113169	chr7:67774969	C (C:G;0.809:0.827)	0.88 (0.83-0.93)	1.266e-05	0.988	+-----------+-	27.2 (CHI2 = 17.8; DF = 1; P=0.163)	chr7:67711168..67811633	NONE	NONE	NONE	NONE
rs7799732	chr7:114621460	A (A:G;0.452:0.429)	1.11 (1.06-1.16)	1.31e-05	0.986	+++-+-++++++++	14.3 (CHI2 = 15.1; DF = 1; P=0.297)	chr7:114593865..114747072	LINC01393 MDFIC	[de With SA et al., PMID:25656473	(cis)TFEC (trans)SH2D1A (trans)SLC12A7	NONE
rs7684366	chr4:152737856	T (T:C;0.259:0.284)	0.89 (0.84-0.94)	1.366e-05	0.918	-------+------	0.00 (CHI2 = 10.7; DF = 1; P=0.635)	chr4:152728941..152780684	NONE	NONE	(cis)PET112L (trans)ARMCX2 (trans)PLA2G16	NONE
rs17387110	chr15:47982492	T (T:G;0.431:0.456)	0.90 (0.86-0.95)	1.427e-05	1	----------+---	0.00 (CHI2 = 12.2; DF = 1; P=0.508)	chr15:47933163..48050095	SEMA6D	NONE	(cis)CTXN2	NONE
rs4652928	chr1:37206262	A (A:G;0.340:0.368)	0.89 (0.84-0.94)	1.552e-05	0.737	--------------	0.00 (CHI2 = 9.68; DF = 1; P=0.720)	chr1:37202097..37261085	NONE	NONE	(trans)HNMT (trans)LGALS3 (trans)UTS2	NONE
rs62216215	chr21:33850028	A (A:C;0.778:0.762)	1.14 (1.07-1.21)	1.564e-05	0.822	++++++-++++-++	10.1 (CHI2 = 14.4; DF = 1; P=0.342)	chr21:33782206..33867280	EVA1C	NONE	NONE	NONE
rs7897060	chr10:35882647	C (C:G;0.708:0.726)	0.90 (0.85-0.94)	1.604e-05	1	+---------+--+	0.00 (CHI2 = 12.3; DF = 1; P=0.500)	chr10:35878148..35909646	GJD4	NONE	NONE	NONE
rs12659560	chr5:179609305	T (T:C;0.436:0.419)	1.11 (1.06-1.17)	1.62e-05	0.888	++++--+++++++-	0.00 (CHI2 = 12.5; DF = 1; P=0.484)	chr5:179601491..179616398	RASGEF1C	NONE	(trans)CD244 (trans)NFIL3	NONE
rs4659712	chr1:236912839	A (A:G;0.415:0.434)	0.90 (0.86-0.95)	1.65e-05	0.956	-----++--+----	0.00 (CHI2 = 12.5; DF = 1; P=0.484)	chr1:236899343..236938860	ACTN2	NONE	(trans)FLOT2	NONE
rs9387201	chr6:114608143	C (C:G;0.101:0.090)	1.21 (1.11-1.32)	1.671e-05	0.804	++++++++-++++-	9.60 (CHI2 = 14.3; DF = 1; P=0.347)	chr6:114608143..114855860	LOC101927768	NONE	(cis)MARCKS	NONE
rs342016	chr3:6882212	A (A:G;0.204:0.188)	1.14 (1.07-1.20)	1.702e-05	0.954	++++++-+++-+-+	0.00 (CHI2 = 12.6; DF = 1; P=0.478)	chr3:6880004..6902624	NONE	NONE	NONE	NONE
rs76188283	chr3:71024696	T (T:C;0.119:0.105)	1.17 (1.09-1.26)	1.712e-05	0.96	+++++-++++-+++	0.00 (CHI2 = 7.86; DF = 1; P=0.852)	chr3:70907066..71160361	FOXP1	[Levine DM et al., PMID:24121790	(trans)ASRGL1 (trans)CHST2 (trans)FGFBP2 (trans)INA	(trans)HSD11B1 (trans)NUDT21
chr12_96221819_D	chr12:96221819	I5 (I5:D;0.543:0.514)	1.11 (1.06-1.17)	1.764e-05	0.887	-------------+	0.00 (CHI2 = 8.15; DF = 1; P=0.833)	chr12:96180145..96302462	CCDC38 NTN4 SNRPF	[Soler Artigas M et al., PMID:21946350	(cis)SNRPF (trans)IFNGR1 (trans)IGF2BP3	(trans)SLC45A4
rs2601187	chr15:90929388	A (A:G;0.724:0.706)	1.12 (1.06-1.17)	1.78e-05	0.993	++++++++++++++	0.00 (CHI2 = 8.49; DF = 1; P=0.810)	chr15:90890799..91083353	CRTC3 GABARAPL3 IQGAP1 ZNF774	NONE	(cis)BLM (cis)C15orf42 (cis)CIB1 (cis)NGRN (cis)PRC1 (trans)SLC39A4	(cis)IQGAP1 (trans)IQGAP1
rs2368140	chr2:181091900	A (A:G;0.673:0.694)	0.90 (0.86-0.94)	1.801e-05	0.995	-----+-----+--	0.00 (CHI2 = 12.4; DF = 1; P=0.491)	chr2:181045431..181306647	NONE	NONE	(trans)IL15	NONE
rs12725407	chr1:216931077	C (C:G;0.191:0.171)	1.14 (1.07-1.21)	1.917e-05	0.949	+++++++++-++++	0.00 (CHI2 = 8.29; DF = 1; P=0.824)	chr1:216829269..216941624	ESRRG	NONE	(trans)TMEM194B	(trans)WIF1
rs12609867	chr19:30306552	A (A:G;0.205:0.227)	0.88 (0.83-0.93)	1.965e-05	0.881	-------+-----+	13.2 (CHI2 = 14.9; DF = 1; P=0.309)	chr19:30263322..30328851	CCNE1	[Figueroa JD et al., PMID:24163127 [Rothman N et al., PMID:20972438	NONE	NONE
rs12126604	chr1:78058385	T (T:C;0.091:0.104)	0.85 (0.78-0.91)	2.031e-05	0.98	---+-----+----	6.50 (CHI2 = 13.8; DF = 1; P=0.381)	chr1:77899667..78819970	AK5 DNAJB4 FAM73A FUBP1 GIPC2 MGC27382 NEXN NEXN-AS1 USP33 ZZZ3	[Berndt SI et al., PMID:23563607 [Jostins L et al., PMID:23128233 [Lango Allen H et al., PMID:20881960 [Wood AR et al., PMID:25282103	(cis)FUBP1 (cis)IFI44 (cis)NEXN (cis)PTGFR (trans)AHSP (trans)BSPRY (trans)NEFH (trans)TPM2	(trans)ALKBH6 (trans)C2orf44 (trans)DDX6 (trans)FAM58A (trans)HINT2 (trans)NIT2 (trans)NMRAL1 (trans)SLC26A10 (trans)TSSC1
rs3820500	chr1:118013322	A (A:G;0.686:0.666)	1.11 (1.06-1.16)	2.109e-05	1.01	++++++++-++-++	0.00 (CHI2 = 12.9; DF = 1; P=0.454)	chr1:117848822..118098984	LINC01525 MAN1A2	NONE	(cis)SPAG17 (trans)MNDA (trans)NEFH (trans)NOTUM (trans)PTCHD2 (trans)TDRD9	NONE
rs12886621	chr14:29644348	T (T:G;0.890:0.873)	1.17 (1.09-1.26)	2.134e-05	0.914	++++++++++++++	0.00 (CHI2 = 7.10; DF = 1; P=0.897)	chr14:29540108..29681138	NONE	NONE	(cis)FOXG1 (trans)HDGFRP3	NONE
rs6854329	chr4:93596856	C (C:G;0.052:0.061)	0.81 (0.73-0.89)	2.293e-05	0.968	-------+-+----	0.00 (CHI2 = 8.27; DF = 1; P=0.826)	chr4:93452066..93640457	GRID2	NONE	(trans)HDGFRP3 (trans)MOCOS	(trans)ENDOG
rs6811974	chr4:93984438	T (T:C;0.570:0.606)	0.91 (0.87-0.95)	2.299e-05	1.02	-----+-------+	0.00 (CHI2 = 8.32; DF = 1; P=0.822)	chr4:93658805..94157778	GRID2	NONE	NONE	(trans)AMICA1 (trans)ARC (trans)CCL3 (trans)CCL4 (trans)CHD7 (trans)DUSP6 (trans)EGR2 (trans)EPHB1 (trans)FOSB (trans)GADD45G (trans)PTGS2 (trans)ZFPM2
rs4239875	chr22:35338995	A (A:G;0.206:0.187)	1.13 (1.07-1.20)	2.33e-05	0.991	++++++++-+-+++	0.00 (CHI2 = 11.3; DF = 1; P=0.585)	chr22:35307207..35342717	NONE	NONE	NONE	NONE
rs10182178	chr2:23654697	A (A:G;0.373:0.353)	1.11 (1.06-1.16)	2.416e-05	0.993	++-+++-+++++++	17.8 (CHI2 = 15.8; DF = 1; P=0.260)	chr2:23621124..23689034	KLHL29	NONE	(trans)DHRS1	NONE
rs9482120	chr6:98392667	A (A:C;0.599:0.624)	0.90 (0.86-0.95)	2.514e-05	0.99	--------------	0.00 (CHI2 = 8.64; DF = 1; P=0.799)	chr6:98233195..98591622	MIR2113	[Davies G et al., PMID:25644384 [MÃŒhleisen et al., PMID:24618891 [Rietveld CA et al., PMID:23722424 [Rietveld CA et al., PMID:25201988 [Wang Y et al., PMID:25601762	(trans)SHE	(trans)TPM2
chr10_69763783_D	chr10:69763783	I2 (I2:D;0.877:0.857)	1.18 (1.09-1.27)	2.567e-05	0.792	--+-------+---	0.00 (CHI2 = 11.4; DF = 1; P=0.577)	chr10:69410048..69896336	CTNNA3 DNAJC12 HERC4 MYPN POU5F1P5 SIRT1	NONE	(cis)DNAJC12 (trans)CA4 (trans)SERPINA1	NONE
rs13233145	chr7:10227391	A (A:C;0.513:0.492)	1.11 (1.06-1.16)	2.671e-05	0.916	+++++--++++++-	0.00 (CHI2 = 7.41; DF = 1; P=0.879)	chr7:10206034..10306206	NONE	NONE	NONE	(trans)ASMT (trans)SCGB1D2 (trans)SCGB2A2 (trans)SH2D2A (trans)SLC5A7 (trans)TTR
rs7135621	chr12:80453341	T (T:C;0.431:0.449)	0.91 (0.87-0.95)	2.797e-05	1.01	-------+----+-	30.4 (CHI2 = 18.6; DF = 1; P=0.134)	chr12:80453341..80556864	NONE	NONE	(trans)DAZL (trans)RCAN1	NONE
chr14_99235398_I	chr14:99235398	I7 (I7:D;0.105:0.093)	1.22 (1.11-1.34)	2.922e-05	0.673	---------+-+--	29.1 (CHI2 = 18.3; DF = 1; P=0.145)	chr14:99189927..99237348	NONE	NONE	NONE	NONE
rs67120295	chr5:133356044	T (T:C;0.156:0.136)	1.15 (1.08-1.22)	2.933e-05	0.991	+++++++++-++-+	14.6 (CHI2 = 15.2; DF = 1; P=0.293)	chr5:133294384..133416974	C5orf15 VDAC1	NONE	(trans)DPYD	NONE
rs11817353	chr10:61741051	A (A:C;0.481:0.504)	0.91 (0.87-0.95)	2.95e-05	0.976	--+------+----	0.00 (CHI2 = 11.1; DF = 1; P=0.597)	chr10:61715314..61785671	LINC01553	NONE	(cis)ANK3 (trans)AEBP1 (trans)C4orf22	NONE
rs1943999	chr18:76044718	C (C:G;0.379:0.396)	0.90 (0.86-0.95)	3.062e-05	0.892	---+----------	24.6 (CHI2 = 17.2; DF = 1; P=0.188)	chr18:76017228..76055131	NONE	NONE	(trans)FHL1	NONE
rs11976985	chr7:31833918	T (T:C;0.800:0.822)	0.88 (0.83-0.94)	3.161e-05	0.973	+---------+-+-	0.00 (CHI2 = 10.6; DF = 1; P=0.636)	chr7:31826095..31890104	PDE1C	NONE	(trans)FLJ40434 (trans)LGALS14	NONE
rs6437449	chr3:194736484	A (A:G;0.113:0.101)	1.17 (1.09-1.27)	3.242e-05	0.94	+++++-+-++-+++	0.00 (CHI2 = 11.5; DF = 1; P=0.564)	chr3:194722866..194736738	NONE	NONE	NONE	(cis)TNK2
rs75192393	chr1:162005477	T (T:C;0.099:0.091)	1.18 (1.09-1.27)	3.251e-05	0.986	++++++++++-++-	0.00 (CHI2 = 10.0; DF = 1; P=0.691)	chr1:161978623..162111400	NOS1AP OLFML2B	[Arking DE et al., PMID:16648850 [Arking DE et al., PMID:24952745 [Chambers JC et al., PMID:20062061 [Holm H et al., PMID:20062063 [Marroni F et al., PMID:20031603 [Newton-Cheh C et al., PMID:19305408 [Nolte IM et al., PMID:19587794 [Pfeufer A et al., PMID:19305409 [Sano M et al., PMID:25055868 [Smith JG et al., PMID:23166209	(cis)B4GALT3 (cis)FCGR2B (cis)FCGR2C (cis)HSPA6 (trans)MEIS2	(trans)LRTM1 (trans)PBX3
rs2078282	chr16:2208889	A (A:G;0.227:0.244)	0.89 (0.84-0.94)	3.257e-05	0.898	------+---++--	9.70 (CHI2 = 14.4; DF = 1; P=0.346)	chr16:2163579..2289455	BRICD5 CASKIN1 DNASE1L2 E4F1 MIR3180-5 MIR4516 MLST8 PGP PKD1 RAB26 SNHG19 SNORD60 TRAF7	[Lango Allen H et al., PMID:20881960	(cis)MLST8 (cis)SEPX1	NONE
rs62113419	chr19:7672046	A (A:C;0.872:0.857)	1.16 (1.08-1.24)	3.322e-05	0.903	+++++-+-++-+++	21.1 (CHI2 = 16.4; DF = 1; P=0.225)	chr19:7636751..7731619	CAMSAP3 MIR6792 PCP2 PET100 STXBP2 XAB2	NONE	(cis)KIAA1543 (cis)LOC100131801 (cis)PCP2 (cis)STXBP2 (cis)XAB2 (trans)WNT5A	NONE
rs163489	chr5:178696394	A (A:G;0.658:0.643)	1.11 (1.06-1.17)	3.328e-05	0.89	++++-+-+++-+++	30.1 (CHI2 = 18.6; DF = 1; P=0.136)	chr5:178696394..178698324	ADAMTS2	NONE	NONE	NONE
chr3_33191013_D	chr3:33191013	I2 (I2:D;0.265:0.246)	1.13 (1.07-1.19)	3.355e-05	0.834	-----+----+--+	0.00 (CHI2 = 6.51; DF = 1; P=0.926)	chr3:33152151..33194990	CRTAP SUSD5	NONE	(cis)PDCD6IP (trans)TARP	NONE
rs17589281	chr1:187132799	T (T:C;0.073:0.084)	0.84 (0.77-0.91)	3.374e-05	0.993	---+----------	18.3 (CHI2 = 15.9; DF = 1; P=0.254)	chr1:187074167..187277499	LINC01036	NONE	NONE	NONE
rs10202643	chr2:99393898	A (A:T;0.306:0.323)	0.90 (0.86-0.95)	3.414e-05	0.979	-----+------+-	0.00 (CHI2 = 6.52; DF = 1; P=0.925)	chr2:99372132..99771681	C2orf15 KIAA1211L LIPT1 LOC101927070 TSGA10	NONE	(cis)LIPT1 (cis)TSGA10 (cis)UNC50 (trans)PER3	NONE
rs35713482	chr17:1189677	A (A:G;0.393:0.374)	1.11 (1.06-1.16)	3.447e-05	0.933	+++++++++-++-+	0.00 (CHI2 = 10.0; DF = 1; P=0.689)	chr17:1182166..1204291	TUSC5	NONE	(cis)SERPINF1	NONE
rs75099274	chr15:54381200	A (A:G;0.085:0.076)	1.23 (1.12-1.36)	3.563e-05	0.726	-+++++++--++++	0.00 (CHI2 = 10.2; DF = 1; P=0.669)	chr15:54381200..54381200	UNC13C	NONE	NONE	NONE
rs9300913	chr13:104993149	A (A:G;0.683:0.661)	1.13 (1.07-1.20)	3.617e-05	0.694	++-+++++++++++	0.00 (CHI2 = 9.96; DF = 1; P=0.697)	chr13:104993149..104993193	NONE	NONE	NONE	NONE
rs1386253	chr11:24761831	A (A:G;0.530:0.513)	1.10 (1.05-1.15)	3.725e-05	0.982	+++-+-++++++++	32.1 (CHI2 = 19.1; DF = 1; P=0.119)	chr11:24759535..24770151	LUZP2	NONE	NONE	(trans)FAM192A
rs2167341	chr2:39122900	T (T:G;0.216:0.198)	1.16 (1.08-1.25)	3.757e-05	0.615	+++-++++++-++-	17.8 (CHI2 = 15.8; DF = 1; P=0.259)	chr2:39122900..39122900	NONE	NONE	NONE	NONE
rs198540	chr17:48643801	T (T:C;0.673:0.656)	1.12 (1.06-1.18)	3.789e-05	0.842	++-+--++++++++	46.6 (CHI2 = 24.3; DF = 1; P=0.028)	chr17:48642502..48647011	CACNA1G	NONE	(cis)SPATA20	NONE
rs12930616	chr16:6656606	C (C:G;0.293:0.275)	1.11 (1.06-1.17)	3.795e-05	0.944	++++++++++-+++	0.00 (CHI2 = 11.8; DF = 1; P=0.536)	chr16:6656073..6695451	RBFOX1	NONE	NONE	NONE
rs29063	chr18:9965179	A (A:G;0.613:0.595)	1.10 (1.05-1.16)	3.836e-05	0.979	0+++++++++++++	0.00 (CHI2 = 9.63; DF = 1; P=0.724)	chr18:9893269..9985809	VAPA	NONE	(trans)CAPN8 (trans)GUCY1B3	NONE
rs148521358	chr7:70497737	C (C:G;0.906:0.915)	0.83 (0.76-0.91)	3.903e-05	0.831	-----+--------	0.00 (CHI2 = 11.9; DF = 1; P=0.533)	chr7:70497737..70614846	WBSCR17	NONE	NONE	NONE
rs11608890	chr12:132571956	T (T:G;0.890:0.899)	0.84 (0.77-0.91)	3.986e-05	0.794	-----+----+---	0.00 (CHI2 = 12.3; DF = 1; P=0.496)	chr12:132417451..132571956	EP400 EP400NL PUS1 SNORA49	NONE	(cis)DDX51 (cis)GALNT9	(trans)OFD1
rs56166204	chr7:73929437	A (A:G;0.121:0.109)	1.19 (1.10-1.29)	4.046e-05	0.729	+++++-++++++++	0.00 (CHI2 = 11.8; DF = 1; P=0.541)	chr7:73877809..73987405	GTF2IRD1	NONE	(trans)ABP1 (trans)PHF21B	NONE
rs76847144	chr11:35648301	T (T:C;0.943:0.949)	0.80 (0.72-0.89)	4.052e-05	0.861	-------------+	0.00 (CHI2 = 8.69; DF = 1; P=0.796)	chr11:35561328..35811024	FJX1 TRIM44	NONE	(cis)C11orf74 (cis)LDLRAD3 (trans)CD47 (trans)NRN1 (trans)TM4SF19	NONE
chr3_182308608_I	chr3:182308608	D (D:I3;0.663:0.687)	0.90 (0.85-0.95)	4.244e-05	0.862	---------+--+-	29.2 (CHI2 = 18.3; DF = 1; P=0.145)	chr3:182255600..182314029	NONE	NONE	NONE	NONE
chr11_98107192_D	chr11:98107192	D (D:I3;0.461:0.446)	1.10 (1.05-1.16)	4.418e-05	0.931	+++-++++++++-+	0.00 (CHI2 = 11.1; DF = 1; P=0.601)	chr11:97920233..98148098	NONE	NONE	(trans)HLA-DMB	NONE
rs146737360	chr9:119296736	T (T:G;0.360:0.377)	0.91 (0.86-0.95)	4.436e-05	0.99	+--------+--++	11.5 (CHI2 = 14.6; DF = 1; P=0.327)	chr9:119163509..119485337	ASTN2 ASTN2-AS1 PAPPA TRIM32	[Anttila V et al., PMID:23793025 [Freilinger T et al., PMID:22683712	(trans)APOBEC3B (trans)L1TD1 (trans)MIR1229	(trans)CRX (trans)CXCL2 (trans)DDX6 (trans)ENO3 (trans)GUCA1C (trans)LRTM1 (trans)SH2D2A (trans)SLC5A7 (trans)TTR
rs4327921	chr9:74750736	A (A:G;0.606:0.626)	0.91 (0.87-0.95)	4.437e-05	0.988	-----+------+-	12.1 (CHI2 = 14.7; DF = 1; P=0.321)	chr9:74729250..74815119	GDA	NONE	(trans)ARL4C (trans)TP53BP2	NONE
chr2_118616767_D	chr2:118616767	I2 (I2:D;0.953:0.945)	1.25 (1.12-1.39)	4.438e-05	0.952	--------------	0.00 (CHI2 = 7.67; DF = 1; P=0.864)	chr2:118368816..118873792	CCDC93 DDX18 INSIG2	[Willer CJ et al., PMID:24097068	(cis)DDX18 (cis)INSIG2 (trans)ABLIM1 (trans)RNF130 (trans)RNF212 (trans)SH2D1A (trans)SIRPG	NONE
rs13288399	chr9:6569923	C (C:G;0.250:0.268)	0.90 (0.85-0.94)	4.565e-05	0.954	-----+-+------	0.00 (CHI2 = 11.2; DF = 1; P=0.592)	chr9:6568116..6610892	GLDC	NONE	NONE	NONE
rs10153779	chr2:58578234	A (A:G;0.354:0.371)	0.91 (0.86-0.95)	4.611e-05	0.988	----+----+----	0.00 (CHI2 = 8.87; DF = 1; P=0.782)	chr2:58577971..58680680	NONE	NONE	(trans)CD9 (trans)RLN2	NONE
rs11972269	chr7:156284810	A (A:C;0.070:0.059)	1.23 (1.11-1.35)	4.625e-05	0.897	+++++-+++-+++-	0.00 (CHI2 = 12.3; DF = 1; P=0.497)	chr7:156272891..156295881	LINC01006	NONE	NONE	NONE
rs2028664	chr6:48510398	A (A:C;0.519:0.493)	1.10 (1.05-1.15)	4.673e-05	0.993	-+++-+++++++++	0.00 (CHI2 = 8.30; DF = 1; P=0.823)	chr6:48394934..48519948	NONE	NONE	(trans)NR2F2 (trans)SIRPG	(trans)LINGO2
rs7142878	chr14:89576144	A (A:C;0.945:0.939)	1.24 (1.12-1.37)	4.735e-05	0.864	++++++-+++++-+	0.00 (CHI2 = 8.54; DF = 1; P=0.806)	chr14:89536619..89581337	NONE	NONE	(trans)FCRL2	NONE
rs1866408	chr2:119573528	T (T:C;0.210:0.201)	1.12 (1.06-1.19)	4.841e-05	0.997	++++++++++++++	0.00 (CHI2 = 6.43; DF = 1; P=0.929)	chr2:119452258..119631981	EN1	NONE	(trans)CXCL14 (trans)HILS1 (trans)LILRA2 (trans)OAF (trans)SYPL2 (trans)TPBG	(trans)FGL2 (trans)FOXD1 (trans)FZD1 (trans)KLK1 (trans)SFRP2 (trans)SLC26A2 (trans)UPK1B
rs76010911	chr10:82760677	A (A:G;0.959:0.948)	1.29 (1.14-1.47)	4.844e-05	0.777	++++++++++-++-	29.1 (CHI2 = 18.3; DF = 1; P=0.145)	chr10:82760677..82874115	NONE	NONE	NONE	NONE
rs75811747	chr16:51188433	A (A:T;0.577:0.556)	1.10 (1.05-1.16)	4.859e-05	0.917	+++++-++++++--	0.00 (CHI2 = 11.9; DF = 1; P=0.528)	chr16:51163406..51211595	SALL1	NONE	(trans)SPESP1	NONE
rs1409313	chr10:104191601	T (T:C;0.189:0.174)	1.13 (1.07-1.20)	4.941e-05	0.995	++++-++++++++-	33.2 (CHI2 = 19.4; DF = 1; P=0.110)	chr10:103804114..104209407	C10orf76 CUEDC2 ELOVL3 FBXL15 GBF1 HPS6 LDB1 MIR146B NFKB2 NOLC1 PITX3 PPRC1 PSD	[Arking DE et al., PMID:24952745	(trans)BZW2 (trans)CNTN6 (trans)GAS2 (trans)IL13RA1 (trans)SNN (trans)UTS2 (trans)VNN1 (trans)ZNF853	(trans)CCL3L1 (trans)CCL4
rs2230267	chr19:49469087	T (T:C;0.489:0.474)	1.10 (1.05-1.16)	4.99e-05	0.905	+++++-+++++-+-	14.8 (CHI2 = 15.2; DF = 1; P=0.291)	chr19:49451217..49484169	BAX FTL GYS1	NONE	(trans)ISX	NONE
rs79857083	chr1:44283497	T (T:C;0.608:0.585)	1.11 (1.05-1.16)	5.05e-05	0.886	++++-+++++--++	32.7 (CHI2 = 19.3; DF = 1; P=0.114)	chr1:43970956..44369435	KDM4A KDM4A-AS1 LOC101929592 MIR6079 PTPRF ST3GAL3	[Perry JR et al., PMID:25231870 [Ripke S et al., PMID:25056061	(cis)B4GALT2 (cis)BTBD19 (cis)DPH2 (cis)EBNA1BP2 (cis)ERI3 (cis)MED8 (cis)ST3GAL3 (cis)TIE1	NONE
rs62082728	chr18:14719580	T (T:C;0.626:0.602)	1.11 (1.05-1.17)	5.074e-05	0.851	-+++++++++++-+	0.00 (CHI2 = 6.01; DF = 1; P=0.946)	chr18:14674576..14752768	ANKRD30B	NONE	NONE	NONE
rs1926229	chr1:198593312	C (C:G;0.782:0.769)	1.12 (1.06-1.18)	5.126e-05	0.972	++++++-++++++-	0.00 (CHI2 = 12.3; DF = 1; P=0.498)	chr1:198543996..198593807	NONE	NONE	(trans)FERMT2	(trans)DUSP2 (trans)FCER2 (trans)WFIKKN1 (trans)WNT1
rs4518181	chr4:253881	T (T:C;0.085:0.073)	1.20 (1.10-1.31)	5.132e-05	0.92	+++-+++++++++-	21.1 (CHI2 = 16.4; DF = 1; P=0.225)	chr4:72510..315279	ZNF595 ZNF718 ZNF732 ZNF876P	NONE	(cis)ZNF141 (cis)ZNF718	(trans)PTP4A1
rs79507139	chr14:92586558	A (A:G;0.145:0.157)	0.87 (0.81-0.93)	5.159e-05	0.887	+----+--------	0.00 (CHI2 = 12.9; DF = 1; P=0.455)	chr14:92544769..92639767	ATXN3 CPSF2 NDUFB1	NONE	(cis)NDUFB1 (cis)TRIP11	(cis)ATXN3
rs192668887	chr7:67494130	T (T:C;0.905:0.913)	0.82 (0.74-0.90)	5.212e-05	0.649	------+-----++	1.50 (CHI2 = 13.1; DF = 1; P=0.433)	chr7:67494130..67494130	LOC102723427	NONE	NONE	NONE
rs76397051	chr6:85478365	A (A:G;0.113:0.099)	1.16 (1.08-1.25)	5.227e-05	0.994	+++++-+++-+--+	0.00 (CHI2 = 10.8; DF = 1; P=0.620)	chr6:85211666..85516100	TBX18 TBX18-AS1	NONE	(cis)NT5E (trans)CA2 (trans)LIN7A (trans)NFIL3 (trans)SEPP1 (trans)TBC1D8	(trans)ASMT (trans)CRX (trans)DEFB119 (trans)ENO3 (trans)GSG1 (trans)GUCA1C (trans)LRTM1 (trans)PDE6H (trans)SH2D2A (trans)SLC5A7 (trans)TTR
rs4440173	chr4:160327856	A (A:G;0.551:0.535)	1.10 (1.05-1.15)	5.259e-05	1.02	++++++-+++-+-+	30.4 (CHI2 = 18.6; DF = 1; P=0.134)	chr4:160185669..160355746	RAPGEF2	NONE	(trans)ABLIM1 (trans)GAGE12I (trans)REC8	NONE
rs113706540	chr7:95104945	T (T:C;0.142:0.161)	0.87 (0.82-0.93)	5.3e-05	0.929	--------------	0.00 (CHI2 = 3.38; DF = 1; P=0.996)	chr7:95080493..95161660	ASB4	NONE	(cis)SGCE (trans)DDX43 (trans)HOXB2	(trans)BCORL1 (trans)EPS8L2
rs1436358	chr12:116372404	T (T:C;0.936:0.945)	0.81 (0.73-0.90)	5.322e-05	0.897	------------++	0.00 (CHI2 = 12.6; DF = 1; P=0.472)	chr12:116372404..116375962	NONE	NONE	NONE	NONE
rs10797990	chr1:184798596	T (T:C;0.290:0.317)	0.90 (0.86-0.95)	5.337e-05	0.956	-----+--------	0.00 (CHI2 = 7.17; DF = 1; P=0.893)	chr1:184737999..184800630	FAM129A	NONE	NONE	NONE
rs55742253	chr16:2063733	T (T:C;0.140:0.156)	0.86 (0.80-0.93)	5.453e-05	0.806	-----+-------+	0.00 (CHI2 = 8.74; DF = 1; P=0.792)	chr16:2014130..2070433	GFER NOXO1 NPW RNF151 RPS2 SNHG9 SNORA78 SYNGR3 TBL3 ZNF598	NONE	(cis)FAHD1 (cis)NDUFB10 (cis)SEPX1 (cis)SYNGR3 (trans)PRPF6 (trans)PTAFR (trans)RAP2A (trans)TGFBR3	(trans)MTTP
rs1102586	chr3:118766238	A (A:G;0.206:0.189)	1.13 (1.07-1.21)	5.621e-05	0.851	+-++++-++-+++-	0.30 (CHI2 = 13.0; DF = 1; P=0.445)	chr3:118610653..118892550	C3orf30 IGSF11 IGSF11-AS1 UPK1B	NONE	(trans)IFI44 (trans)IFIT1 (trans)NEFH (trans)STXBP6 (trans)UGT2A3	(trans)NCAPD2
chr13_53857042_D	chr13:53857042	I2 (I2:D;0.512:0.487)	1.10 (1.05-1.15)	5.624e-05	0.991	-+----------+-	22.0 (CHI2 = 16.6; DF = 1; P=0.215)	chr13:53625781..54040483	LINC01065 OLFM4	NONE	(cis)CKAP2 (trans)ATP7B (trans)GDPD5 (trans)IL13	(cis)SUGT1 (trans)CRABP1 (trans)CXCL11 (trans)ENPP6 (trans)FGL2 (trans)KIAA0232 (trans)KIAA1199 (trans)SLC47A1 (trans)SLPI
rs2786484	chr1:42299909	T (T:C;0.920:0.933)	0.83 (0.76-0.91)	5.781e-05	0.918	------+--+--++	15.8 (CHI2 = 15.4; DF = 1; P=0.281)	chr1:42274619..42350417	HIVEP3	NONE	(trans)GMPR	NONE
rs10209593	chr2:237695644	A (A:G;0.043:0.056)	0.80 (0.71-0.89)	5.847e-05	0.907	----+-------+-	18.1 (CHI2 = 15.8; DF = 1; P=0.257)	chr2:237693323..237708550	NONE	NONE	NONE	NONE
rs6955951	chr7:148324258	A (A:T;0.587:0.563)	1.10 (1.05-1.15)	5.945e-05	0.978	++++++++++-+++	0.00 (CHI2 = 10.9; DF = 1; P=0.615)	chr7:148305430..148346638	C7orf33	NONE	(trans)CYB5R2 (trans)SLC30A8	NONE
rs58500924	chr2:77287936	A (A:G;0.072:0.086)	0.84 (0.77-0.91)	5.992e-05	0.948	--+--+---+--+-	33.8 (CHI2 = 19.6; DF = 1; P=0.105)	chr2:77119035..77358977	LOC101927907 LRRTM4	NONE	(trans)AICDA (trans)LGALS3BP	NONE
rs55767008	chr5:96307359	T (T:C;0.932:0.944)	0.82 (0.75-0.91)	6.021e-05	0.992	-----------+--	0.00 (CHI2 = 10.3; DF = 1; P=0.666)	chr5:96218598..96316470	ERAP2 LNPEP	[Franke A et al., PMID:21102463 [Jostins L et al., PMID:23128233 [Kuiper JJ et al., PMID:24957906	(cis)ERAP2	(cis)LNPEP (trans)LNPEP
rs10169115	chr2:140816602	C (C:G;0.226:0.207)	1.12 (1.06-1.18)	6.101e-05	0.965	++++++++++++++	0.00 (CHI2 = 4.11; DF = 1; P=0.990)	chr2:140662795..140895392	NONE	NONE	(trans)AKAP7 (trans)CRABP1 (trans)PDE4A (trans)SBSN (trans)ZNF239	NONE
rs2931203	chr2:240324316	A (A:T;0.743:0.768)	0.90 (0.85-0.95)	6.148e-05	0.942	-----+--------	0.00 (CHI2 = 10.0; DF = 1; P=0.687)	chr2:240183467..240327863	HDAC4 MIR2467 MIR4269	NONE	(trans)ANXA3 (trans)HNMT (trans)TGM2	NONE
rs10784860	chr12:70944714	T (T:C;0.309:0.324)	0.90 (0.86-0.95)	6.16e-05	0.981	--------------	0.00 (CHI2 = 6.39; DF = 1; P=0.930)	chr12:70913328..70944714	PTPRB	NONE	NONE	NONE
rs2150291	chr14:64331423	T (T:C;0.199:0.181)	1.13 (1.06-1.19)	6.251e-05	0.966	+++-++++++++++	23.8 (CHI2 = 17.0; DF = 1; P=0.197)	chr14:64229305..64474121	MIR548AZ SYNE2	[Demirkan A et al., PMID:22359512 [Hicks AA et al., PMID:19798445 [Shin SY et al., PMID:24816252	(cis)C14orf50 (trans)KLF2	(cis)ZBTB25
rs4392770	chr7:72213451	T (T:C;0.235:0.217)	1.12 (1.06-1.19)	6.416e-05	0.922	++++++++++++++	0.00 (CHI2 = 10.7; DF = 1; P=0.631)	chr7:72022225..72417063	MIR4650-1 MIR4650-2 POM121 SBDSP1 SPDYE7P TYW1B	[Teslovich TM et al., PMID:20686565	(cis)DNAJC30 (cis)TYW1B (trans)TYW1	NONE
chr8_138837351_I	chr8:138837351	I2 (I2:D;0.205:0.226)	0.88 (0.83-0.94)	6.474e-05	0.793	+++++-+++-++++	0.00 (CHI2 = 10.1; DF = 1; P=0.682)	chr8:138822798..138852065	NONE	NONE	NONE	NONE
rs13016472	chr2:127501263	T (T:C;0.373:0.394)	0.91 (0.87-0.95)	6.536e-05	0.964	--+-----------	0.00 (CHI2 = 8.42; DF = 1; P=0.815)	chr2:127501263..127523134	NONE	NONE	NONE	NONE
rs118059975	chr10:49884575	A (A:C;0.245:0.259)	0.89 (0.84-0.94)	6.546e-05	0.817	+----+--------	41.2 (CHI2 = 22.1; DF = 1; P=0.054)	chr10:49879717..49902125	WDFY4	NONE	NONE	NONE
rs78661858	chr7:129594320	A (A:G;0.894:0.907)	0.83 (0.76-0.91)	6.55e-05	0.698	---++-+--+----	4.10 (CHI2 = 13.5; DF = 1; P=0.406)	chr7:129543199..129594320	UBE2H	NONE	(cis)CPA2	NONE
chr16_62649826_D	chr16:62649826	D (D:I3;0.053:0.062)	0.79 (0.70-0.89)	6.561e-05	0.713	------------+-	0.00 (CHI2 = 12.1; DF = 1; P=0.513)	chr16:62649826..62649826	NONE	NONE	NONE	NONE
chr15_52811815_D	chr15:52811815	I2 (I2:D;0.072:0.060)	1.26 (1.12-1.41)	6.625e-05	0.637	------------+-	14.9 (CHI2 = 15.2; DF = 1; P=0.290)	chr15:52811815..52811815	MYO5A	NONE	NONE	NONE
chr8_84959513_D	chr8:84959513	D (D:I6;0.070:0.083)	0.82 (0.75-0.91)	6.701e-05	0.814	+----+-------+	35.0 (CHI2 = 20.0; DF = 1; P=0.095)	chr8:84959513..84961909	NONE	NONE	NONE	NONE
rs73785549	chr5:126584272	C (C:G;0.954:0.942)	1.23 (1.11-1.37)	6.768e-05	1	+++-++-++-++++	0.00 (CHI2 = 7.98; DF = 1; P=0.845)	chr5:126546576..126631791	MEGF10	NONE	NONE	(trans)ADORA2A (trans)NUP210
rs1674923	chr10:127849380	T (T:C;0.590:0.610)	0.91 (0.87-0.95)	6.782e-05	0.998	-------------+	0.00 (CHI2 = 10.3; DF = 1; P=0.666)	chr10:127827758..127851175	ADAM12	NONE	NONE	NONE
rs4842996	chr15:85419498	T (T:C;0.772:0.752)	1.12 (1.06-1.18)	6.857e-05	0.973	+++++-+-++++++	0.00 (CHI2 = 6.64; DF = 1; P=0.920)	chr15:85173872..85452820	ALPK3 NMB SCAND2P SEC11A SLC28A1 WDR73 ZNF592	NONE	(trans)C3orf14 (trans)L1TD1	NONE
rs2222734	chr2:84891084	A (A:G;0.856:0.866)	0.85 (0.79-0.92)	6.894e-05	0.723	------------+-	0.00 (CHI2 = 5.79; DF = 1; P=0.953)	chr2:84726156..84894838	DNAH6	NONE	NONE	NONE
rs6742513	chr2:122645099	C (C:G;0.168:0.149)	1.13 (1.07-1.21)	6.906e-05	1	+++++-+++-+-++	23.8 (CHI2 = 17.0; DF = 1; P=0.197)	chr2:122592055..123013425	NONE	NONE	(trans)CSTA	NONE
rs77116141	chr13:111772414	T (T:C;0.796:0.817)	0.89 (0.84-0.94)	6.993e-05	0.956	------------+-	0.00 (CHI2 = 5.89; DF = 1; P=0.950)	chr13:111719291..111780597	ARHGEF7 ARHGEF7-AS2 LINC00368	NONE	(cis)ARHGEF7 (cis)RAB20 (trans)BMP4 (trans)C8orf31 (trans)CCR9 (trans)COL5A3 (trans)CXCL14 (trans)EEF1A2 (trans)EFEMP1 (trans)FAM49A (trans)KDM5D (trans)LOC100134868 (trans)LZTFL1 (trans)PHF16 (trans)PRICKLE2 (trans)RAI14 (trans)T (trans)TRAT1	NONE
rs9466619	chr6:23099219	A (A:G;0.214:0.230)	0.90 (0.85-0.95)	7.003e-05	0.993	------------+-	0.00 (CHI2 = 6.35; DF = 1; P=0.932)	chr6:23039791..23184142	NONE	NONE	(trans)CACNB2 (trans)CNTN6 (trans)GPR109B (trans)GPR183 (trans)PTPRG (trans)UTS2	(trans)DIEXF (trans)ST6GALNAC5
rs76014157	chr9:72470461	A (A:G;0.044:0.052)	0.79 (0.71-0.89)	7.011e-05	0.87	+------------+	0.00 (CHI2 = 10.7; DF = 1; P=0.632)	chr9:72470461..72475010	C9orf135	NONE	NONE	NONE
rs6474169	chr8:39577963	T (T:G;0.431:0.407)	1.10 (1.05-1.15)	7.117e-05	0.966	+++++--++++++-	9.50 (CHI2 = 14.3; DF = 1; P=0.349)	chr8:39505191..39612977	ADAM18 ADAM2	NONE	NONE	NONE
chr16_20726949_I	chr16:20726949	I2 (I2:D;0.045:0.053)	0.76 (0.66-0.87)	7.126e-05	0.62	+-+++++++++++-	23.3 (CHI2 = 16.9; DF = 1; P=0.201)	chr16:20726949..20726949	NONE	NONE	NONE	NONE
chr7_127644308_D	chr7:127644308	D (D:I3;0.278:0.300)	0.90 (0.86-0.95)	7.164e-05	1	-+-----------+	0.00 (CHI2 = 11.9; DF = 1; P=0.536)	chr7:127263886..127788296	LRRC4 MIR593 SND1 SND1-IT1	NONE	(cis)GCC1 (trans)CA2 (trans)TCN2	NONE
rs615512	chr6:148228944	A (A:G;0.934:0.927)	1.20 (1.09-1.31)	7.212e-05	1.01	++++++-+++++++	0.00 (CHI2 = 4.45; DF = 1; P=0.985)	chr6:148198077..148319229	NONE	NONE	(trans)SCML1 (trans)SYNGR3	NONE
chr6_116315485_D	chr6:116315485	D (D:I3;0.741:0.721)	1.12 (1.06-1.18)	7.246e-05	0.834	+++++-+++-++++	0.00 (CHI2 = 9.62; DF = 1; P=0.725)	chr6:116315485..116422847	FRK NT5DC1 TPI1P3	[Yu Y et al., PMID:21665990	(cis)FAM26F (cis)NT5DC1 (trans)CCDC19 (trans)FAM154B (trans)FEZ1	NONE
rs4078350	chr1:30032065	C (C:G;0.430:0.418)	1.10 (1.05-1.16)	7.292e-05	0.888	-++++-+++++++-	0.00 (CHI2 = 12.1; DF = 1; P=0.516)	chr1:30032065..30150297	NONE	NONE	(trans)TRIM2	NONE
rs2582821	chr8:97532153	T (T:G;0.178:0.168)	1.13 (1.06-1.20)	7.58e-05	0.97	++++++++++++++	0.00 (CHI2 = 6.66; DF = 1; P=0.919)	chr8:97529682..97543956	SDC2	NONE	NONE	NONE
rs62235658	chr21:41461480	T (T:C;0.848:0.864)	0.87 (0.82-0.93)	7.601e-05	0.934	---------+++--	0.00 (CHI2 = 12.4; DF = 1; P=0.495)	chr21:41452034..41512161	DSCAM	NONE	(trans)PLOD2	NONE
rs1513723	chr8:66703788	C (C:G;0.381:0.398)	0.91 (0.87-0.95)	7.62e-05	0.963	----------++-+	1.30 (CHI2 = 13.1; DF = 1; P=0.435)	chr8:66607219..66755163	MTFR1 PDE7A	NONE	(cis)ARMC1 (cis)DNAJC5B (cis)MTFR1 (trans)EPHB1 (trans)LIPG	(trans)CXCL9 (trans)GBP4 (trans)IFIH1
rs75695875	chr1:82250392	A (A:G;0.100:0.110)	0.86 (0.79-0.92)	7.748e-05	0.913	-----+-------+	0.00 (CHI2 = 9.82; DF = 1; P=0.708)	chr1:82220276..82539588	ADGRL2	NONE	(trans)CHL1 (trans)DUSP4 (trans)GALNT14 (trans)GIMAP5 (trans)PALLD (trans)REC8	NONE
rs4715431	chr6:53756628	A (A:G;0.447:0.428)	1.10 (1.05-1.15)	7.779e-05	0.933	-++++-++++++-+	0.00 (CHI2 = 8.92; DF = 1; P=0.779)	chr6:53590928..53829104	LOC101927189 LRRC1	NONE	(cis)LRRC1 (trans)BCL7A (trans)MARK1 (trans)POTEG	(trans)MKNK2
rs11981158	chr7:52157948	A (A:G;0.733:0.714)	1.11 (1.05-1.17)	7.812e-05	0.98	+++++--+++-+++	0.00 (CHI2 = 12.4; DF = 1; P=0.489)	chr7:52094116..52211692	NONE	NONE	(trans)DPYD (trans)KANK1	NONE
rs61979775	chr14:87422204	T (T:C;0.682:0.696)	0.91 (0.86-0.95)	7.844e-05	0.993	+----+--------	40.8 (CHI2 = 21.9; DF = 1; P=0.056)	chr14:87336273..87487967	LOC283585	NONE	(trans)HDAC9	NONE
rs1738638	chr6:83948518	A (A:T;0.739:0.757)	0.89 (0.84-0.94)	7.844e-05	0.79	------+------+	2.70 (CHI2 = 13.3; DF = 1; P=0.420)	chr6:83911265..84017921	ME1	NONE	(cis)ME1 (cis)RWDD2A	NONE
rs12950709	chr17:73248996	A (A:G;0.860:0.874)	0.87 (0.81-0.93)	7.896e-05	0.952	-----------+--	0.00 (CHI2 = 10.2; DF = 1; P=0.673)	chr17:73219608..73520359	CASKIN2 GGA3 GRB2 LOC100287042 MIF4GD MIR3678 MIR6785 MRPS7 NUP85 SLC25A19 TMEM94 TSEN54	NONE	(cis)CD300A (cis)FDXR (cis)MRPS7 (cis)PRPSAP1 (trans)CTNND1 (trans)LOC646214 (trans)SELL	(trans)FSCN1
rs1203311	chr14:73605531	A (A:C;0.049:0.057)	0.81 (0.73-0.90)	8.125e-05	0.952	---------+--+-	0.00 (CHI2 = 11.5; DF = 1; P=0.566)	chr14:73343471..73717433	DCAF4 DPF3 PAPLN PSEN1 RBM25 ZFYVE1	NONE	(cis)ACOT2 (cis)DCAF4 (cis)ENTPD5 (cis)PNMA1 (trans)CR2 (trans)FAM153A	(trans)ADORA2A (trans)ADRBK2 (trans)ARAP2 (trans)CA1 (trans)CALD1 (trans)CCDC75 (trans)CDC42BPA (trans)DST (trans)ESF1 (trans)FABP4 (trans)GPR88 (trans)HBG1 (trans)HBG2 (trans)KRCC1 (trans)PHACTR1 (trans)POU3F2 (trans)PPP4R2 (trans)SCGB1D2 (trans)SCGB2A2 (trans)SRGAP1 (trans)TYW3
rs72694312	chr14:24673655	T (T:G;0.095:0.083)	1.18 (1.09-1.28)	8.164e-05	0.932	-+++++++++-+-+	0.00 (CHI2 = 10.6; DF = 1; P=0.636)	chr14:24662857..24702032	CHMP4A GMPR2 MDP1 NEDD8 NEDD8-MDP1 TM9SF1 TSSK4	NONE	(cis)RABGGTA (cis)REC8	NONE
rs6117854	chr20:7551554	A (A:G;0.293:0.318)	0.90 (0.86-0.95)	8.206e-05	0.972	------+-------	0.00 (CHI2 = 10.6; DF = 1; P=0.638)	chr20:7551554..7661329	NONE	NONE	(trans)DTHD1 (trans)RNF130	(trans)GATAD2B
rs171794	chr16:29303120	T (T:C;0.100:0.094)	1.20 (1.10-1.32)	8.235e-05	0.694	+++++-++++++++	0.00 (CHI2 = 8.42; DF = 1; P=0.815)	chr16:29255976..29304259	NONE	NONE	(cis)KIF22	NONE
rs1376888	chr2:237643604	T (T:C;0.571:0.545)	1.10 (1.05-1.15)	8.281e-05	0.997	+-+++-+++++++-	23.8 (CHI2 = 17.0; DF = 1; P=0.197)	chr2:237601109..237678052	NONE	NONE	(cis)RAB17 (trans)SERPINA1	NONE
rs2909451	chr2:162871798	T (T:C;0.192:0.208)	0.89 (0.84-0.94)	8.299e-05	0.994	-----+---++-++	5.70 (CHI2 = 13.7; DF = 1; P=0.390)	chr2:162801454..162878404	DPP4 SLC4A10	[Jiang L et al., PMID:24782177 [Ripke S et al., PMID:25056061	NONE	NONE
rs78853604	chr8:9672263	T (T:C;0.649:0.627)	1.11 (1.06-1.17)	8.456e-05	0.776	+++++-+-++++--	0.00 (CHI2 = 10.6; DF = 1; P=0.640)	chr8:9481687..9685720	MIR597 TNKS	NONE	(cis)PPP1R3B	NONE
rs7024761	chr9:115096346	A (A:G;0.209:0.193)	1.12 (1.06-1.19)	8.473e-05	0.995	+++++-++++++++	0.00 (CHI2 = 9.67; DF = 1; P=0.720)	chr9:114918772..115147463	HSDL2 MIR3134 PTBP3 SUSD1	NONE	(cis)HSDL2 (cis)ROD1 (trans)LOC144571 (trans)SERPINA1	NONE
rs646680	chr5:32470955	A (A:G;0.727:0.753)	0.90 (0.86-0.95)	8.584e-05	0.975	---------+--++	52.5 (CHI2 = 27.3; DF = 1; P=0.011)	chr5:32461803..32493382	NONE	NONE	(trans)PRKCH	NONE
rs2293507	chr7:70228020	T (T:G;0.044:0.051)	0.80 (0.72-0.90)	8.603e-05	0.958	-------+----?-	0.00 (CHI2 = 7.73; DF = 1; P=0.805)	chr7:70217631..70257129	AUTS2	NONE	NONE	NONE
rs7429990	chr3:47901803	A (A:C;0.260:0.274)	0.90 (0.86-0.95)	8.687e-05	1.01	-------------+	0.00 (CHI2 = 2.75; DF = 1; P=0.999)	chr3:47588649..48326433	CAMP CDC25A CSPG5 DHX30 MAP4 MIR1226 MIR4443 SMARCC1 ZNF589	[Wain LV et al., PMID:21909110	(cis)KLHL18 (cis)NME6 (cis)PLXNB1 (cis)QARS (cis)SHISA5 (cis)TMEM89 (trans)PTCHD2	(cis)ZNF589 (trans)C2CD4B (trans)CSF3 (trans)ZNF589
chr1_29188427_I	chr1:29188427	D (D:I3;0.473:0.454)	1.10 (1.05-1.15)	8.743e-05	0.902	+++++++-+++-++	0.00 (CHI2 = 11.5; DF = 1; P=0.565)	chr1:29186719..29556158	EPB41 MECR OPRD1 SRSF4 TMEM200B	NONE	(cis)TAF12 (trans)LASS6 (trans)PLOD2	NONE
rs2226753	chr11:124439736	T (T:C;0.364:0.381)	0.91 (0.87-0.95)	8.927e-05	1.01	----++------+-	0.00 (CHI2 = 11.2; DF = 1; P=0.588)	chr11:124406100..124446589	OR8A1 OR8B12	NONE	(trans)NEFH	NONE
chr19_30237263_I	chr19:30237263	D (D:I4;0.916:0.924)	0.81 (0.73-0.90)	9.009e-05	0.604	----------+---	0.00 (CHI2 = 5.86; DF = 1; P=0.951)	chr19:30237263..30237263	NONE	NONE	NONE	NONE
rs2564899	chr9:114857260	T (T:C;0.408:0.429)	0.91 (0.87-0.96)	9.03e-05	0.987	------+--+-++-	14.3 (CHI2 = 15.1; DF = 1; P=0.297)	chr9:114832028..114888773	MIR3134 SUSD1	NONE	(trans)UTS2	NONE
rs9931719	chr16:58951683	T (T:C;0.164:0.149)	1.14 (1.07-1.21)	9.095e-05	0.943	-+-+++++++++++	0.00 (CHI2 = 8.93; DF = 1; P=0.778)	chr16:58944980..59003254	NONE	NONE	NONE	NONE
rs2293280	chr7:109219912	C (C:G;0.936:0.926)	1.20 (1.10-1.32)	9.107e-05	0.933	+++++++-++++++	0.00 (CHI2 = 8.84; DF = 1; P=0.784)	chr7:109118334..109235449	NONE	NONE	(trans)PLAGL1 (trans)PNLDC1 (trans)SPATA20	(trans)CA1
rs7619385	chr3:10414909	A (A:G;0.586:0.565)	1.09 (1.05-1.15)	9.113e-05	1.01	++-++++-+--+++	19.2 (CHI2 = 16.0; DF = 1; P=0.244)	chr3:10281647..10510287	ATP2B2 GHRL GHRLOS IRAK2 LINC00852 MIR378B MIR885 SEC13 TATDN2	NONE	(cis)ATG7 (cis)C3orf42 (cis)GHRL (cis)MTMR14 (cis)OGG1 (trans)BAG3 (trans)C17orf87 (trans)CYP1B1 (trans)IL17RB (trans)NINJ2 (trans)OSR2 (trans)SLC23A2	NONE
rs138493916	chr2:61062412	C (C:G;0.080:0.067)	1.20 (1.10-1.31)	9.186e-05	0.91	++++++++++++--	0.00 (CHI2 = 10.3; DF = 1; P=0.668)	chr2:61036023..61062412	NONE	NONE	NONE	NONE
rs2842330	chr14:69010925	A (A:C;0.935:0.921)	1.21 (1.10-1.33)	9.205e-05	0.858	++++++++--++++	0.00 (CHI2 = 12.5; DF = 1; P=0.481)	chr14:68970211..69010925	RAD51B	NONE	(cis)ACTN1	NONE
rs6601581	chr8:11197598	T (T:C;0.788:0.771)	1.14 (1.07-1.22)	9.397e-05	0.672	++++++-+++++-+	0.00 (CHI2 = 9.55; DF = 1; P=0.730)	chr8:11130977..11219386	MTMR9 SLC35G5 TDH	NONE	(cis)FAM167A (cis)MSRA (cis)NEIL2 (trans)IL18R1	NONE
rs190401890	chr7:133787989	A (A:T;0.061:0.051)	1.26 (1.12-1.41)	9.407e-05	0.723	++-+++++++-+++	0.00 (CHI2 = 9.88; DF = 1; P=0.703)	chr7:133787989..133787989	NONE	NONE	NONE	NONE
rs6079556	chr20:14745223	A (A:C;0.452:0.466)	0.91 (0.87-0.96)	9.541e-05	1.02	--+--+----+-+-	39.9 (CHI2 = 21.6; DF = 1; P=0.061)	chr20:14696013..14913496	MACROD2 MACROD2-AS1	[Anney R et al., PMID:20663923	NONE	NONE
rs4964602	chr12:108047886	T (T:G;0.206:0.228)	0.90 (0.85-0.95)	9.641e-05	1.01	-----+----+---	2.10 (CHI2 = 13.2; DF = 1; P=0.427)	chr12:108034827..108139363	BTBD11 LOC101929162 PRDM4 PWP1	NONE	(cis)PWP1 (trans)PEG3 (trans)RBMY2FP (trans)TMPRSS3	NONE
chr19_11253886_D	chr19:11253886	I2 (I2:D;0.161:0.173)	0.88 (0.83-0.94)	9.817e-05	0.933	++++-+++++--++	8.60 (CHI2 = 14.2; DF = 1; P=0.358)	chr19:11220410..11257018	LDLR MIR6886 SPC24	[Kim YJ et al., PMID:21909109	(trans)ALDH1A1	NONE
rs10053166	chr5:60842210	A (A:G;0.871:0.885)	0.87 (0.81-0.93)	9.896e-05	0.979	-------+--++-+	0.00 (CHI2 = 12.2; DF = 1; P=0.506)	chr5:60603462..60842210	ZSWIM6	[Bergen SE et al., PMID:22688191	(trans)PCGF5	(trans)SLC16A3
chr13_60161890_I	chr13:60161890	I2 (I2:D;0.204:0.218)	0.88 (0.83-0.94)	9.942e-05	0.78	++++++++-+++-+	0.00 (CHI2 = 9.36; DF = 1; P=0.745)	chr13:60130083..60406796	DIAPH3	NONE	(trans)JAM3 (trans)NEFH	(trans)CRX (trans)GNB3 (trans)GUCA1C (trans)LRTM1 (trans)OTX2 (trans)PDE6H (trans)SH2D2A (trans)SLC5A7 (trans)TTR
rs6456277	chr6:19827389	C (C:G;0.396:0.409)	0.90 (0.85-0.95)	9.971e-05	0.713	+----+--------	0.00 (CHI2 = 7.91; DF = 1; P=0.849)	chr6:19827389..19827389	NONE	NONE	NONE	NONE
