# Supplementary material for: Meta-analysis of GWAS of over 16,000 individuals with autism spectrum disorder highlights a novel locus at 10q24.32 and a significant overlap with schizophrenia
Source: Mol Autism. 2017 May 22;8:21. doi: 10.1186/s13229-017-0137-9 (PMC5441062; doi:10.1186/s13229-017-0137-9)
Supplement: Supplementary file 5 — Summary Gene-based association findings (VEGAS2) for ASD Meta-analysis (World-wide Ancestries); Data reported on ALL and P < .05. (SETS 0.97 MB) [file 13229_2017_137_MOESM5_ESM.sets]

86	Iossifov2014:0002	Iossifov2014_ChromatinModifiers
326	Iossifov2014:0002	Iossifov2014_ChromatinModifiers
472	Iossifov2014:0002	Iossifov2014_ChromatinModifiers
545	Iossifov2014:0002	Iossifov2014_ChromatinModifiers
639	Iossifov2014:0002	Iossifov2014_ChromatinModifiers
648	Iossifov2014:0002	Iossifov2014_ChromatinModifiers
672	Iossifov2014:0002	Iossifov2014_ChromatinModifiers
676	Iossifov2014:0002	Iossifov2014_ChromatinModifiers
846	Iossifov2014:0002	Iossifov2014_ChromatinModifiers
1058	Iossifov2014:0002	Iossifov2014_ChromatinModifiers
1105	Iossifov2014:0002	Iossifov2014_ChromatinModifiers
1106	Iossifov2014:0002	Iossifov2014_ChromatinModifiers
1107	Iossifov2014:0002	Iossifov2014_ChromatinModifiers
1108	Iossifov2014:0002	Iossifov2014_ChromatinModifiers
1387	Iossifov2014:0002	Iossifov2014_ChromatinModifiers
1647	Iossifov2014:0002	Iossifov2014_ChromatinModifiers
1786	Iossifov2014:0002	Iossifov2014_ChromatinModifiers
1788	Iossifov2014:0002	Iossifov2014_ChromatinModifiers
1789	Iossifov2014:0002	Iossifov2014_ChromatinModifiers
1911	Iossifov2014:0002	Iossifov2014_ChromatinModifiers
1912	Iossifov2014:0002	Iossifov2014_ChromatinModifiers
2033	Iossifov2014:0002	Iossifov2014_ChromatinModifiers
2073	Iossifov2014:0002	Iossifov2014_ChromatinModifiers
2074	Iossifov2014:0002	Iossifov2014_ChromatinModifiers
2122	Iossifov2014:0002	Iossifov2014_ChromatinModifiers
2145	Iossifov2014:0002	Iossifov2014_ChromatinModifiers
2146	Iossifov2014:0002	Iossifov2014_ChromatinModifiers
2186	Iossifov2014:0002	Iossifov2014_ChromatinModifiers
2584	Iossifov2014:0002	Iossifov2014_ChromatinModifiers
2648	Iossifov2014:0002	Iossifov2014_ChromatinModifiers
3014	Iossifov2014:0002	Iossifov2014_ChromatinModifiers
3015	Iossifov2014:0002	Iossifov2014_ChromatinModifiers
3065	Iossifov2014:0002	Iossifov2014_ChromatinModifiers
3066	Iossifov2014:0002	Iossifov2014_ChromatinModifiers
3070	Iossifov2014:0002	Iossifov2014_ChromatinModifiers
3146	Iossifov2014:0002	Iossifov2014_ChromatinModifiers
3148	Iossifov2014:0002	Iossifov2014_ChromatinModifiers
3150	Iossifov2014:0002	Iossifov2014_ChromatinModifiers
3151	Iossifov2014:0002	Iossifov2014_ChromatinModifiers
3275	Iossifov2014:0002	Iossifov2014_ChromatinModifiers
3276	Iossifov2014:0002	Iossifov2014_ChromatinModifiers
3431	Iossifov2014:0002	Iossifov2014_ChromatinModifiers
3621	Iossifov2014:0002	Iossifov2014_ChromatinModifiers
3622	Iossifov2014:0002	Iossifov2014_ChromatinModifiers
3720	Iossifov2014:0002	Iossifov2014_ChromatinModifiers
3930	Iossifov2014:0002	Iossifov2014_ChromatinModifiers
4152	Iossifov2014:0002	Iossifov2014_ChromatinModifiers
4221	Iossifov2014:0002	Iossifov2014_ChromatinModifiers
4302	Iossifov2014:0002	Iossifov2014_ChromatinModifiers
4616	Iossifov2014:0002	Iossifov2014_ChromatinModifiers
4691	Iossifov2014:0002	Iossifov2014_ChromatinModifiers
4869	Iossifov2014:0002	Iossifov2014_ChromatinModifiers
4928	Iossifov2014:0002	Iossifov2014_ChromatinModifiers
5253	Iossifov2014:0002	Iossifov2014_ChromatinModifiers
5562	Iossifov2014:0002	Iossifov2014_ChromatinModifiers
5563	Iossifov2014:0002	Iossifov2014_ChromatinModifiers
5580	Iossifov2014:0002	Iossifov2014_ChromatinModifiers
5897	Iossifov2014:0002	Iossifov2014_ChromatinModifiers
5926	Iossifov2014:0002	Iossifov2014_ChromatinModifiers
5927	Iossifov2014:0002	Iossifov2014_ChromatinModifiers
5928	Iossifov2014:0002	Iossifov2014_ChromatinModifiers
5929	Iossifov2014:0002	Iossifov2014_ChromatinModifiers
5977	Iossifov2014:0002	Iossifov2014_ChromatinModifiers
6045	Iossifov2014:0002	Iossifov2014_ChromatinModifiers
6304	Iossifov2014:0002	Iossifov2014_ChromatinModifiers
6418	Iossifov2014:0002	Iossifov2014_ChromatinModifiers
6595	Iossifov2014:0002	Iossifov2014_ChromatinModifiers
6596	Iossifov2014:0002	Iossifov2014_ChromatinModifiers
6597	Iossifov2014:0002	Iossifov2014_ChromatinModifiers
6598	Iossifov2014:0002	Iossifov2014_ChromatinModifiers
6599	Iossifov2014:0002	Iossifov2014_ChromatinModifiers
6601	Iossifov2014:0002	Iossifov2014_ChromatinModifiers
6602	Iossifov2014:0002	Iossifov2014_ChromatinModifiers
6603	Iossifov2014:0002	Iossifov2014_ChromatinModifiers
6604	Iossifov2014:0002	Iossifov2014_ChromatinModifiers
6606	Iossifov2014:0002	Iossifov2014_ChromatinModifiers
6607	Iossifov2014:0002	Iossifov2014_ChromatinModifiers
6672	Iossifov2014:0002	Iossifov2014_ChromatinModifiers
6794	Iossifov2014:0002	Iossifov2014_ChromatinModifiers
6830	Iossifov2014:0002	Iossifov2014_ChromatinModifiers
6871	Iossifov2014:0002	Iossifov2014_ChromatinModifiers
6880	Iossifov2014:0002	Iossifov2014_ChromatinModifiers
6881	Iossifov2014:0002	Iossifov2014_ChromatinModifiers
6883	Iossifov2014:0002	Iossifov2014_ChromatinModifiers
6942	Iossifov2014:0002	Iossifov2014_ChromatinModifiers
7158	Iossifov2014:0002	Iossifov2014_ChromatinModifiers
7290	Iossifov2014:0002	Iossifov2014_ChromatinModifiers
7320	Iossifov2014:0002	Iossifov2014_ChromatinModifiers
7324	Iossifov2014:0002	Iossifov2014_ChromatinModifiers
7468	Iossifov2014:0002	Iossifov2014_ChromatinModifiers
7703	Iossifov2014:0002	Iossifov2014_ChromatinModifiers
7799	Iossifov2014:0002	Iossifov2014_ChromatinModifiers
7862	Iossifov2014:0002	Iossifov2014_ChromatinModifiers
7994	Iossifov2014:0002	Iossifov2014_ChromatinModifiers
8019	Iossifov2014:0002	Iossifov2014_ChromatinModifiers
8028	Iossifov2014:0002	Iossifov2014_ChromatinModifiers
8087	Iossifov2014:0002	Iossifov2014_ChromatinModifiers
8089	Iossifov2014:0002	Iossifov2014_ChromatinModifiers
8091	Iossifov2014:0002	Iossifov2014_ChromatinModifiers
8110	Iossifov2014:0002	Iossifov2014_ChromatinModifiers
8165	Iossifov2014:0002	Iossifov2014_ChromatinModifiers
8193	Iossifov2014:0002	Iossifov2014_ChromatinModifiers
8202	Iossifov2014:0002	Iossifov2014_ChromatinModifiers
8208	Iossifov2014:0002	Iossifov2014_ChromatinModifiers
8289	Iossifov2014:0002	Iossifov2014_ChromatinModifiers
8295	Iossifov2014:0002	Iossifov2014_ChromatinModifiers
8438	Iossifov2014:0002	Iossifov2014_ChromatinModifiers
8458	Iossifov2014:0002	Iossifov2014_ChromatinModifiers
8464	Iossifov2014:0002	Iossifov2014_ChromatinModifiers
8520	Iossifov2014:0002	Iossifov2014_ChromatinModifiers
8535	Iossifov2014:0002	Iossifov2014_ChromatinModifiers
8554	Iossifov2014:0002	Iossifov2014_ChromatinModifiers
8607	Iossifov2014:0002	Iossifov2014_ChromatinModifiers
8648	Iossifov2014:0002	Iossifov2014_ChromatinModifiers
8681	Iossifov2014:0002	Iossifov2014_ChromatinModifiers
8726	Iossifov2014:0002	Iossifov2014_ChromatinModifiers
8805	Iossifov2014:0002	Iossifov2014_ChromatinModifiers
8841	Iossifov2014:0002	Iossifov2014_ChromatinModifiers
8850	Iossifov2014:0002	Iossifov2014_ChromatinModifiers
8930	Iossifov2014:0002	Iossifov2014_ChromatinModifiers
8932	Iossifov2014:0002	Iossifov2014_ChromatinModifiers
9031	Iossifov2014:0002	Iossifov2014_ChromatinModifiers
9063	Iossifov2014:0002	Iossifov2014_ChromatinModifiers
9070	Iossifov2014:0002	Iossifov2014_ChromatinModifiers
9112	Iossifov2014:0002	Iossifov2014_ChromatinModifiers
9212	Iossifov2014:0002	Iossifov2014_ChromatinModifiers
9219	Iossifov2014:0002	Iossifov2014_ChromatinModifiers
9271	Iossifov2014:0002	Iossifov2014_ChromatinModifiers
9324	Iossifov2014:0002	Iossifov2014_ChromatinModifiers
9329	Iossifov2014:0002	Iossifov2014_ChromatinModifiers
9513	Iossifov2014:0002	Iossifov2014_ChromatinModifiers
9557	Iossifov2014:0002	Iossifov2014_ChromatinModifiers
9575	Iossifov2014:0002	Iossifov2014_ChromatinModifiers
9666	Iossifov2014:0002	Iossifov2014_ChromatinModifiers
9678	Iossifov2014:0002	Iossifov2014_ChromatinModifiers
9682	Iossifov2014:0002	Iossifov2014_ChromatinModifiers
9734	Iossifov2014:0002	Iossifov2014_ChromatinModifiers
9739	Iossifov2014:0002	Iossifov2014_ChromatinModifiers
9759	Iossifov2014:0002	Iossifov2014_ChromatinModifiers
9810	Iossifov2014:0002	Iossifov2014_ChromatinModifiers
9869	Iossifov2014:0002	Iossifov2014_ChromatinModifiers
9913	Iossifov2014:0002	Iossifov2014_ChromatinModifiers
9960	Iossifov2014:0002	Iossifov2014_ChromatinModifiers
10014	Iossifov2014:0002	Iossifov2014_ChromatinModifiers
10036	Iossifov2014:0002	Iossifov2014_ChromatinModifiers
10155	Iossifov2014:0002	Iossifov2014_ChromatinModifiers
10196	Iossifov2014:0002	Iossifov2014_ChromatinModifiers
10285	Iossifov2014:0002	Iossifov2014_ChromatinModifiers
10322	Iossifov2014:0002	Iossifov2014_ChromatinModifiers
10360	Iossifov2014:0002	Iossifov2014_ChromatinModifiers
10361	Iossifov2014:0002	Iossifov2014_ChromatinModifiers
10419	Iossifov2014:0002	Iossifov2014_ChromatinModifiers
10450	Iossifov2014:0002	Iossifov2014_ChromatinModifiers
10474	Iossifov2014:0002	Iossifov2014_ChromatinModifiers
10498	Iossifov2014:0002	Iossifov2014_ChromatinModifiers
10499	Iossifov2014:0002	Iossifov2014_ChromatinModifiers
10524	Iossifov2014:0002	Iossifov2014_ChromatinModifiers
10600	Iossifov2014:0002	Iossifov2014_ChromatinModifiers
10629	Iossifov2014:0002	Iossifov2014_ChromatinModifiers
10724	Iossifov2014:0002	Iossifov2014_ChromatinModifiers
10743	Iossifov2014:0002	Iossifov2014_ChromatinModifiers
10771	Iossifov2014:0002	Iossifov2014_ChromatinModifiers
10847	Iossifov2014:0002	Iossifov2014_ChromatinModifiers
10856	Iossifov2014:0002	Iossifov2014_ChromatinModifiers
10902	Iossifov2014:0002	Iossifov2014_ChromatinModifiers
10933	Iossifov2014:0002	Iossifov2014_ChromatinModifiers
10951	Iossifov2014:0002	Iossifov2014_ChromatinModifiers
11022	Iossifov2014:0002	Iossifov2014_ChromatinModifiers
11083	Iossifov2014:0002	Iossifov2014_ChromatinModifiers
11091	Iossifov2014:0002	Iossifov2014_ChromatinModifiers
11105	Iossifov2014:0002	Iossifov2014_ChromatinModifiers
11107	Iossifov2014:0002	Iossifov2014_ChromatinModifiers
11108	Iossifov2014:0002	Iossifov2014_ChromatinModifiers
11143	Iossifov2014:0002	Iossifov2014_ChromatinModifiers
11168	Iossifov2014:0002	Iossifov2014_ChromatinModifiers
11176	Iossifov2014:0002	Iossifov2014_ChromatinModifiers
11177	Iossifov2014:0002	Iossifov2014_ChromatinModifiers
11198	Iossifov2014:0002	Iossifov2014_ChromatinModifiers
11262	Iossifov2014:0002	Iossifov2014_ChromatinModifiers
11335	Iossifov2014:0002	Iossifov2014_ChromatinModifiers
22823	Iossifov2014:0002	Iossifov2014_ChromatinModifiers
22895	Iossifov2014:0002	Iossifov2014_ChromatinModifiers
22933	Iossifov2014:0002	Iossifov2014_ChromatinModifiers
22955	Iossifov2014:0002	Iossifov2014_ChromatinModifiers
22976	Iossifov2014:0002	Iossifov2014_ChromatinModifiers
22992	Iossifov2014:0002	Iossifov2014_ChromatinModifiers
23028	Iossifov2014:0002	Iossifov2014_ChromatinModifiers
23030	Iossifov2014:0002	Iossifov2014_ChromatinModifiers
23081	Iossifov2014:0002	Iossifov2014_ChromatinModifiers
23132	Iossifov2014:0002	Iossifov2014_ChromatinModifiers
23135	Iossifov2014:0002	Iossifov2014_ChromatinModifiers
23210	Iossifov2014:0002	Iossifov2014_ChromatinModifiers
23326	Iossifov2014:0002	Iossifov2014_ChromatinModifiers
23338	Iossifov2014:0002	Iossifov2014_ChromatinModifiers
23408	Iossifov2014:0002	Iossifov2014_ChromatinModifiers
23409	Iossifov2014:0002	Iossifov2014_ChromatinModifiers
23410	Iossifov2014:0002	Iossifov2014_ChromatinModifiers
23411	Iossifov2014:0002	Iossifov2014_ChromatinModifiers
23424	Iossifov2014:0002	Iossifov2014_ChromatinModifiers
23429	Iossifov2014:0002	Iossifov2014_ChromatinModifiers
23450	Iossifov2014:0002	Iossifov2014_ChromatinModifiers
23466	Iossifov2014:0002	Iossifov2014_ChromatinModifiers
23468	Iossifov2014:0002	Iossifov2014_ChromatinModifiers
23469	Iossifov2014:0002	Iossifov2014_ChromatinModifiers
23476	Iossifov2014:0002	Iossifov2014_ChromatinModifiers
23492	Iossifov2014:0002	Iossifov2014_ChromatinModifiers
23512	Iossifov2014:0002	Iossifov2014_ChromatinModifiers
23522	Iossifov2014:0002	Iossifov2014_ChromatinModifiers
23569	Iossifov2014:0002	Iossifov2014_ChromatinModifiers
23613	Iossifov2014:0002	Iossifov2014_ChromatinModifiers
23774	Iossifov2014:0002	Iossifov2014_ChromatinModifiers
25842	Iossifov2014:0002	Iossifov2014_ChromatinModifiers
26013	Iossifov2014:0002	Iossifov2014_ChromatinModifiers
26036	Iossifov2014:0002	Iossifov2014_ChromatinModifiers
26038	Iossifov2014:0002	Iossifov2014_ChromatinModifiers
26108	Iossifov2014:0002	Iossifov2014_ChromatinModifiers
26122	Iossifov2014:0002	Iossifov2014_ChromatinModifiers
26147	Iossifov2014:0002	Iossifov2014_ChromatinModifiers
26610	Iossifov2014:0002	Iossifov2014_ChromatinModifiers
27000	Iossifov2014:0002	Iossifov2014_ChromatinModifiers
27005	Iossifov2014:0002	Iossifov2014_ChromatinModifiers
27044	Iossifov2014:0002	Iossifov2014_ChromatinModifiers
27154	Iossifov2014:0002	Iossifov2014_ChromatinModifiers
29028	Iossifov2014:0002	Iossifov2014_ChromatinModifiers
29072	Iossifov2014:0002	Iossifov2014_ChromatinModifiers
29117	Iossifov2014:0002	Iossifov2014_ChromatinModifiers
29128	Iossifov2014:0002	Iossifov2014_ChromatinModifiers
29761	Iossifov2014:0002	Iossifov2014_ChromatinModifiers
29947	Iossifov2014:0002	Iossifov2014_ChromatinModifiers
29994	Iossifov2014:0002	Iossifov2014_ChromatinModifiers
30827	Iossifov2014:0002	Iossifov2014_ChromatinModifiers
50485	Iossifov2014:0002	Iossifov2014_ChromatinModifiers
51105	Iossifov2014:0002	Iossifov2014_ChromatinModifiers
51111	Iossifov2014:0002	Iossifov2014_ChromatinModifiers
51131	Iossifov2014:0002	Iossifov2014_ChromatinModifiers
51147	Iossifov2014:0002	Iossifov2014_ChromatinModifiers
51230	Iossifov2014:0002	Iossifov2014_ChromatinModifiers
51317	Iossifov2014:0002	Iossifov2014_ChromatinModifiers
51322	Iossifov2014:0002	Iossifov2014_ChromatinModifiers
51412	Iossifov2014:0002	Iossifov2014_ChromatinModifiers
51460	Iossifov2014:0002	Iossifov2014_ChromatinModifiers
51533	Iossifov2014:0002	Iossifov2014_ChromatinModifiers
51547	Iossifov2014:0002	Iossifov2014_ChromatinModifiers
51548	Iossifov2014:0002	Iossifov2014_ChromatinModifiers
51564	Iossifov2014:0002	Iossifov2014_ChromatinModifiers
51592	Iossifov2014:0002	Iossifov2014_ChromatinModifiers
51742	Iossifov2014:0002	Iossifov2014_ChromatinModifiers
51773	Iossifov2014:0002	Iossifov2014_ChromatinModifiers
51780	Iossifov2014:0002	Iossifov2014_ChromatinModifiers
53615	Iossifov2014:0002	Iossifov2014_ChromatinModifiers
54014	Iossifov2014:0002	Iossifov2014_ChromatinModifiers
54093	Iossifov2014:0002	Iossifov2014_ChromatinModifiers
54108	Iossifov2014:0002	Iossifov2014_ChromatinModifiers
54454	Iossifov2014:0002	Iossifov2014_ChromatinModifiers
54496	Iossifov2014:0002	Iossifov2014_ChromatinModifiers
54556	Iossifov2014:0002	Iossifov2014_ChromatinModifiers
54617	Iossifov2014:0002	Iossifov2014_ChromatinModifiers
54737	Iossifov2014:0002	Iossifov2014_ChromatinModifiers
54790	Iossifov2014:0002	Iossifov2014_ChromatinModifiers
54799	Iossifov2014:0002	Iossifov2014_ChromatinModifiers
54815	Iossifov2014:0002	Iossifov2014_ChromatinModifiers
54904	Iossifov2014:0002	Iossifov2014_ChromatinModifiers
55023	Iossifov2014:0002	Iossifov2014_ChromatinModifiers
55124	Iossifov2014:0002	Iossifov2014_ChromatinModifiers
55140	Iossifov2014:0002	Iossifov2014_ChromatinModifiers
55148	Iossifov2014:0002	Iossifov2014_ChromatinModifiers
55167	Iossifov2014:0002	Iossifov2014_ChromatinModifiers
55170	Iossifov2014:0002	Iossifov2014_ChromatinModifiers
55193	Iossifov2014:0002	Iossifov2014_ChromatinModifiers
55209	Iossifov2014:0002	Iossifov2014_ChromatinModifiers
55250	Iossifov2014:0002	Iossifov2014_ChromatinModifiers
55252	Iossifov2014:0002	Iossifov2014_ChromatinModifiers
55274	Iossifov2014:0002	Iossifov2014_ChromatinModifiers
55636	Iossifov2014:0002	Iossifov2014_ChromatinModifiers
55677	Iossifov2014:0002	Iossifov2014_ChromatinModifiers
55693	Iossifov2014:0002	Iossifov2014_ChromatinModifiers
55723	Iossifov2014:0002	Iossifov2014_ChromatinModifiers
55806	Iossifov2014:0002	Iossifov2014_ChromatinModifiers
55818	Iossifov2014:0002	Iossifov2014_ChromatinModifiers
55870	Iossifov2014:0002	Iossifov2014_ChromatinModifiers
55929	Iossifov2014:0002	Iossifov2014_ChromatinModifiers
56163	Iossifov2014:0002	Iossifov2014_ChromatinModifiers
56164	Iossifov2014:0002	Iossifov2014_ChromatinModifiers
56165	Iossifov2014:0002	Iossifov2014_ChromatinModifiers
56254	Iossifov2014:0002	Iossifov2014_ChromatinModifiers
56341	Iossifov2014:0002	Iossifov2014_ChromatinModifiers
56916	Iossifov2014:0002	Iossifov2014_ChromatinModifiers
56950	Iossifov2014:0002	Iossifov2014_ChromatinModifiers
56978	Iossifov2014:0002	Iossifov2014_ChromatinModifiers
56979	Iossifov2014:0002	Iossifov2014_ChromatinModifiers
56980	Iossifov2014:0002	Iossifov2014_ChromatinModifiers
56981	Iossifov2014:0002	Iossifov2014_ChromatinModifiers
57117	Iossifov2014:0002	Iossifov2014_ChromatinModifiers
57332	Iossifov2014:0002	Iossifov2014_ChromatinModifiers
57459	Iossifov2014:0002	Iossifov2014_ChromatinModifiers
57492	Iossifov2014:0002	Iossifov2014_ChromatinModifiers
57504	Iossifov2014:0002	Iossifov2014_ChromatinModifiers
57634	Iossifov2014:0002	Iossifov2014_ChromatinModifiers
57649	Iossifov2014:0002	Iossifov2014_ChromatinModifiers
57661	Iossifov2014:0002	Iossifov2014_ChromatinModifiers
57680	Iossifov2014:0002	Iossifov2014_ChromatinModifiers
57713	Iossifov2014:0002	Iossifov2014_ChromatinModifiers
59335	Iossifov2014:0002	Iossifov2014_ChromatinModifiers
59336	Iossifov2014:0002	Iossifov2014_ChromatinModifiers
63976	Iossifov2014:0002	Iossifov2014_ChromatinModifiers
63978	Iossifov2014:0002	Iossifov2014_ChromatinModifiers
64324	Iossifov2014:0002	Iossifov2014_ChromatinModifiers
64754	Iossifov2014:0002	Iossifov2014_ChromatinModifiers
64769	Iossifov2014:0002	Iossifov2014_ChromatinModifiers
65094	Iossifov2014:0002	Iossifov2014_ChromatinModifiers
65980	Iossifov2014:0002	Iossifov2014_ChromatinModifiers
79595	Iossifov2014:0002	Iossifov2014_ChromatinModifiers
79663	Iossifov2014:0002	Iossifov2014_ChromatinModifiers
79723	Iossifov2014:0002	Iossifov2014_ChromatinModifiers
79813	Iossifov2014:0002	Iossifov2014_ChromatinModifiers
79885	Iossifov2014:0002	Iossifov2014_ChromatinModifiers
79918	Iossifov2014:0002	Iossifov2014_ChromatinModifiers
79960	Iossifov2014:0002	Iossifov2014_ChromatinModifiers
80012	Iossifov2014:0002	Iossifov2014_ChromatinModifiers
80205	Iossifov2014:0002	Iossifov2014_ChromatinModifiers
80312	Iossifov2014:0002	Iossifov2014_ChromatinModifiers
80314	Iossifov2014:0002	Iossifov2014_ChromatinModifiers
80335	Iossifov2014:0002	Iossifov2014_ChromatinModifiers
80816	Iossifov2014:0002	Iossifov2014_ChromatinModifiers
80853	Iossifov2014:0002	Iossifov2014_ChromatinModifiers
80854	Iossifov2014:0002	Iossifov2014_ChromatinModifiers
81550	Iossifov2014:0002	Iossifov2014_ChromatinModifiers
83746	Iossifov2014:0002	Iossifov2014_ChromatinModifiers
83852	Iossifov2014:0002	Iossifov2014_ChromatinModifiers
83860	Iossifov2014:0002	Iossifov2014_ChromatinModifiers
83933	Iossifov2014:0002	Iossifov2014_ChromatinModifiers
84108	Iossifov2014:0002	Iossifov2014_ChromatinModifiers
84148	Iossifov2014:0002	Iossifov2014_ChromatinModifiers
84172	Iossifov2014:0002	Iossifov2014_ChromatinModifiers
84181	Iossifov2014:0002	Iossifov2014_ChromatinModifiers
84193	Iossifov2014:0002	Iossifov2014_ChromatinModifiers
84289	Iossifov2014:0002	Iossifov2014_ChromatinModifiers
84333	Iossifov2014:0002	Iossifov2014_ChromatinModifiers
84444	Iossifov2014:0002	Iossifov2014_ChromatinModifiers
84456	Iossifov2014:0002	Iossifov2014_ChromatinModifiers
84619	Iossifov2014:0002	Iossifov2014_ChromatinModifiers
84661	Iossifov2014:0002	Iossifov2014_ChromatinModifiers
84678	Iossifov2014:0002	Iossifov2014_ChromatinModifiers
84733	Iossifov2014:0002	Iossifov2014_ChromatinModifiers
84759	Iossifov2014:0002	Iossifov2014_ChromatinModifiers
84787	Iossifov2014:0002	Iossifov2014_ChromatinModifiers
84844	Iossifov2014:0002	Iossifov2014_ChromatinModifiers
84864	Iossifov2014:0002	Iossifov2014_ChromatinModifiers
90780	Iossifov2014:0002	Iossifov2014_ChromatinModifiers
91133	Iossifov2014:0002	Iossifov2014_ChromatinModifiers
91646	Iossifov2014:0002	Iossifov2014_ChromatinModifiers
93349	Iossifov2014:0002	Iossifov2014_ChromatinModifiers
93624	Iossifov2014:0002	Iossifov2014_ChromatinModifiers
112869	Iossifov2014:0002	Iossifov2014_ChromatinModifiers
112885	Iossifov2014:0002	Iossifov2014_ChromatinModifiers
114803	Iossifov2014:0002	Iossifov2014_ChromatinModifiers
114826	Iossifov2014:0002	Iossifov2014_ChromatinModifiers
115426	Iossifov2014:0002	Iossifov2014_ChromatinModifiers
122402	Iossifov2014:0002	Iossifov2014_ChromatinModifiers
126668	Iossifov2014:0002	Iossifov2014_ChromatinModifiers
127540	Iossifov2014:0002	Iossifov2014_ChromatinModifiers
138474	Iossifov2014:0002	Iossifov2014_ChromatinModifiers
143689	Iossifov2014:0002	Iossifov2014_ChromatinModifiers
148479	Iossifov2014:0002	Iossifov2014_ChromatinModifiers
150572	Iossifov2014:0002	Iossifov2014_ChromatinModifiers
163589	Iossifov2014:0002	Iossifov2014_ChromatinModifiers
171023	Iossifov2014:0002	Iossifov2014_ChromatinModifiers
196528	Iossifov2014:0002	Iossifov2014_ChromatinModifiers
200424	Iossifov2014:0002	Iossifov2014_ChromatinModifiers
221037	Iossifov2014:0002	Iossifov2014_ChromatinModifiers
221400	Iossifov2014:0002	Iossifov2014_ChromatinModifiers
221656	Iossifov2014:0002	Iossifov2014_ChromatinModifiers
256380	Iossifov2014:0002	Iossifov2014_ChromatinModifiers
257218	Iossifov2014:0002	Iossifov2014_ChromatinModifiers
326340	Iossifov2014:0002	Iossifov2014_ChromatinModifiers
339123	Iossifov2014:0002	Iossifov2014_ChromatinModifiers
440822	Iossifov2014:0002	Iossifov2014_ChromatinModifiers
586	Iossifov2014:0003	Iossifov2014_DeNovoLGDsInSchizoprenia
1180	Iossifov2014:0003	Iossifov2014_DeNovoLGDsInSchizoprenia
1740	Iossifov2014:0003	Iossifov2014_DeNovoLGDsInSchizoprenia
1770	Iossifov2014:0003	Iossifov2014_DeNovoLGDsInSchizoprenia
1806	Iossifov2014:0003	Iossifov2014_DeNovoLGDsInSchizoprenia
1833	Iossifov2014:0003	Iossifov2014_DeNovoLGDsInSchizoprenia
1969	Iossifov2014:0003	Iossifov2014_DeNovoLGDsInSchizoprenia
2532	Iossifov2014:0003	Iossifov2014_DeNovoLGDsInSchizoprenia
3312	Iossifov2014:0003	Iossifov2014_DeNovoLGDsInSchizoprenia
3320	Iossifov2014:0003	Iossifov2014_DeNovoLGDsInSchizoprenia
3908	Iossifov2014:0003	Iossifov2014_DeNovoLGDsInSchizoprenia
4282	Iossifov2014:0003	Iossifov2014_DeNovoLGDsInSchizoprenia
4288	Iossifov2014:0003	Iossifov2014_DeNovoLGDsInSchizoprenia
4343	Iossifov2014:0003	Iossifov2014_DeNovoLGDsInSchizoprenia
4627	Iossifov2014:0003	Iossifov2014_DeNovoLGDsInSchizoprenia
4703	Iossifov2014:0003	Iossifov2014_DeNovoLGDsInSchizoprenia
5067	Iossifov2014:0003	Iossifov2014_DeNovoLGDsInSchizoprenia
5274	Iossifov2014:0003	Iossifov2014_DeNovoLGDsInSchizoprenia
5287	Iossifov2014:0003	Iossifov2014_DeNovoLGDsInSchizoprenia
5916	Iossifov2014:0003	Iossifov2014_DeNovoLGDsInSchizoprenia
6326	Iossifov2014:0003	Iossifov2014_DeNovoLGDsInSchizoprenia
6453	Iossifov2014:0003	Iossifov2014_DeNovoLGDsInSchizoprenia
6601	Iossifov2014:0003	Iossifov2014_DeNovoLGDsInSchizoprenia
6884	Iossifov2014:0003	Iossifov2014_DeNovoLGDsInSchizoprenia
6935	Iossifov2014:0003	Iossifov2014_DeNovoLGDsInSchizoprenia
7200	Iossifov2014:0003	Iossifov2014_DeNovoLGDsInSchizoprenia
7840	Iossifov2014:0003	Iossifov2014_DeNovoLGDsInSchizoprenia
7862	Iossifov2014:0003	Iossifov2014_DeNovoLGDsInSchizoprenia
8021	Iossifov2014:0003	Iossifov2014_DeNovoLGDsInSchizoprenia
9140	Iossifov2014:0003	Iossifov2014_DeNovoLGDsInSchizoprenia
9213	Iossifov2014:0003	Iossifov2014_DeNovoLGDsInSchizoprenia
9588	Iossifov2014:0003	Iossifov2014_DeNovoLGDsInSchizoprenia
9816	Iossifov2014:0003	Iossifov2014_DeNovoLGDsInSchizoprenia
9821	Iossifov2014:0003	Iossifov2014_DeNovoLGDsInSchizoprenia
9874	Iossifov2014:0003	Iossifov2014_DeNovoLGDsInSchizoprenia
10002	Iossifov2014:0003	Iossifov2014_DeNovoLGDsInSchizoprenia
10402	Iossifov2014:0003	Iossifov2014_DeNovoLGDsInSchizoprenia
10659	Iossifov2014:0003	Iossifov2014_DeNovoLGDsInSchizoprenia
10771	Iossifov2014:0003	Iossifov2014_DeNovoLGDsInSchizoprenia
11260	Iossifov2014:0003	Iossifov2014_DeNovoLGDsInSchizoprenia
23126	Iossifov2014:0003	Iossifov2014_DeNovoLGDsInSchizoprenia
23259	Iossifov2014:0003	Iossifov2014_DeNovoLGDsInSchizoprenia
23266	Iossifov2014:0003	Iossifov2014_DeNovoLGDsInSchizoprenia
23331	Iossifov2014:0003	Iossifov2014_DeNovoLGDsInSchizoprenia
23334	Iossifov2014:0003	Iossifov2014_DeNovoLGDsInSchizoprenia
23376	Iossifov2014:0003	Iossifov2014_DeNovoLGDsInSchizoprenia
23648	Iossifov2014:0003	Iossifov2014_DeNovoLGDsInSchizoprenia
25836	Iossifov2014:0003	Iossifov2014_DeNovoLGDsInSchizoprenia
25921	Iossifov2014:0003	Iossifov2014_DeNovoLGDsInSchizoprenia
25962	Iossifov2014:0003	Iossifov2014_DeNovoLGDsInSchizoprenia
29760	Iossifov2014:0003	Iossifov2014_DeNovoLGDsInSchizoprenia
50624	Iossifov2014:0003	Iossifov2014_DeNovoLGDsInSchizoprenia
50944	Iossifov2014:0003	Iossifov2014_DeNovoLGDsInSchizoprenia
51517	Iossifov2014:0003	Iossifov2014_DeNovoLGDsInSchizoprenia
51533	Iossifov2014:0003	Iossifov2014_DeNovoLGDsInSchizoprenia
53371	Iossifov2014:0003	Iossifov2014_DeNovoLGDsInSchizoprenia
54832	Iossifov2014:0003	Iossifov2014_DeNovoLGDsInSchizoprenia
55269	Iossifov2014:0003	Iossifov2014_DeNovoLGDsInSchizoprenia
55620	Iossifov2014:0003	Iossifov2014_DeNovoLGDsInSchizoprenia
55628	Iossifov2014:0003	Iossifov2014_DeNovoLGDsInSchizoprenia
56134	Iossifov2014:0003	Iossifov2014_DeNovoLGDsInSchizoprenia
57185	Iossifov2014:0003	Iossifov2014_DeNovoLGDsInSchizoprenia
57644	Iossifov2014:0003	Iossifov2014_DeNovoLGDsInSchizoprenia
57787	Iossifov2014:0003	Iossifov2014_DeNovoLGDsInSchizoprenia
59269	Iossifov2014:0003	Iossifov2014_DeNovoLGDsInSchizoprenia
80308	Iossifov2014:0003	Iossifov2014_DeNovoLGDsInSchizoprenia
83593	Iossifov2014:0003	Iossifov2014_DeNovoLGDsInSchizoprenia
84162	Iossifov2014:0003	Iossifov2014_DeNovoLGDsInSchizoprenia
84166	Iossifov2014:0003	Iossifov2014_DeNovoLGDsInSchizoprenia
84629	Iossifov2014:0003	Iossifov2014_DeNovoLGDsInSchizoprenia
84705	Iossifov2014:0003	Iossifov2014_DeNovoLGDsInSchizoprenia
84775	Iossifov2014:0003	Iossifov2014_DeNovoLGDsInSchizoprenia
90313	Iossifov2014:0003	Iossifov2014_DeNovoLGDsInSchizoprenia
90952	Iossifov2014:0003	Iossifov2014_DeNovoLGDsInSchizoprenia
91746	Iossifov2014:0003	Iossifov2014_DeNovoLGDsInSchizoprenia
92667	Iossifov2014:0003	Iossifov2014_DeNovoLGDsInSchizoprenia
122773	Iossifov2014:0003	Iossifov2014_DeNovoLGDsInSchizoprenia
131544	Iossifov2014:0003	Iossifov2014_DeNovoLGDsInSchizoprenia
144321	Iossifov2014:0003	Iossifov2014_DeNovoLGDsInSchizoprenia
157855	Iossifov2014:0003	Iossifov2014_DeNovoLGDsInSchizoprenia
199953	Iossifov2014:0003	Iossifov2014_DeNovoLGDsInSchizoprenia
221955	Iossifov2014:0003	Iossifov2014_DeNovoLGDsInSchizoprenia
339451	Iossifov2014:0003	Iossifov2014_DeNovoLGDsInSchizoprenia
339829	Iossifov2014:0003	Iossifov2014_DeNovoLGDsInSchizoprenia
344838	Iossifov2014:0003	Iossifov2014_DeNovoLGDsInSchizoprenia
405753	Iossifov2014:0003	Iossifov2014_DeNovoLGDsInSchizoprenia
25	Iossifov2014:0004	Iossifov2014_Embryonic
39	Iossifov2014:0004	Iossifov2014_Embryonic
47	Iossifov2014:0004	Iossifov2014_Embryonic
71	Iossifov2014:0004	Iossifov2014_Embryonic
86	Iossifov2014:0004	Iossifov2014_Embryonic
92	Iossifov2014:0004	Iossifov2014_Embryonic
93	Iossifov2014:0004	Iossifov2014_Embryonic
123	Iossifov2014:0004	Iossifov2014_Embryonic
150	Iossifov2014:0004	Iossifov2014_Embryonic
164	Iossifov2014:0004	Iossifov2014_Embryonic
207	Iossifov2014:0004	Iossifov2014_Embryonic
317	Iossifov2014:0004	Iossifov2014_Embryonic
328	Iossifov2014:0004	Iossifov2014_Embryonic
332	Iossifov2014:0004	Iossifov2014_Embryonic
378	Iossifov2014:0004	Iossifov2014_Embryonic
382	Iossifov2014:0004	Iossifov2014_Embryonic
384	Iossifov2014:0004	Iossifov2014_Embryonic
390	Iossifov2014:0004	Iossifov2014_Embryonic
411	Iossifov2014:0004	Iossifov2014_Embryonic
607	Iossifov2014:0004	Iossifov2014_Embryonic
648	Iossifov2014:0004	Iossifov2014_Embryonic
659	Iossifov2014:0004	Iossifov2014_Embryonic
672	Iossifov2014:0004	Iossifov2014_Embryonic
675	Iossifov2014:0004	Iossifov2014_Embryonic
689	Iossifov2014:0004	Iossifov2014_Embryonic
699	Iossifov2014:0004	Iossifov2014_Embryonic
701	Iossifov2014:0004	Iossifov2014_Embryonic
744	Iossifov2014:0004	Iossifov2014_Embryonic
790	Iossifov2014:0004	Iossifov2014_Embryonic
835	Iossifov2014:0004	Iossifov2014_Embryonic
836	Iossifov2014:0004	Iossifov2014_Embryonic
862	Iossifov2014:0004	Iossifov2014_Embryonic
867	Iossifov2014:0004	Iossifov2014_Embryonic
868	Iossifov2014:0004	Iossifov2014_Embryonic
890	Iossifov2014:0004	Iossifov2014_Embryonic
891	Iossifov2014:0004	Iossifov2014_Embryonic
900	Iossifov2014:0004	Iossifov2014_Embryonic
901	Iossifov2014:0004	Iossifov2014_Embryonic
904	Iossifov2014:0004	Iossifov2014_Embryonic
905	Iossifov2014:0004	Iossifov2014_Embryonic
983	Iossifov2014:0004	Iossifov2014_Embryonic
988	Iossifov2014:0004	Iossifov2014_Embryonic
990	Iossifov2014:0004	Iossifov2014_Embryonic
991	Iossifov2014:0004	Iossifov2014_Embryonic
993	Iossifov2014:0004	Iossifov2014_Embryonic
1000	Iossifov2014:0004	Iossifov2014_Embryonic
1017	Iossifov2014:0004	Iossifov2014_Embryonic
1019	Iossifov2014:0004	Iossifov2014_Embryonic
1024	Iossifov2014:0004	Iossifov2014_Embryonic
1033	Iossifov2014:0004	Iossifov2014_Embryonic
1058	Iossifov2014:0004	Iossifov2014_Embryonic
1062	Iossifov2014:0004	Iossifov2014_Embryonic
1063	Iossifov2014:0004	Iossifov2014_Embryonic
1102	Iossifov2014:0004	Iossifov2014_Embryonic
1104	Iossifov2014:0004	Iossifov2014_Embryonic
1105	Iossifov2014:0004	Iossifov2014_Embryonic
1107	Iossifov2014:0004	Iossifov2014_Embryonic
1108	Iossifov2014:0004	Iossifov2014_Embryonic
1111	Iossifov2014:0004	Iossifov2014_Embryonic
1112	Iossifov2014:0004	Iossifov2014_Embryonic
1122	Iossifov2014:0004	Iossifov2014_Embryonic
1138	Iossifov2014:0004	Iossifov2014_Embryonic
1161	Iossifov2014:0004	Iossifov2014_Embryonic
1263	Iossifov2014:0004	Iossifov2014_Embryonic
1315	Iossifov2014:0004	Iossifov2014_Embryonic
1385	Iossifov2014:0004	Iossifov2014_Embryonic
1387	Iossifov2014:0004	Iossifov2014_Embryonic
1398	Iossifov2014:0004	Iossifov2014_Embryonic
1400	Iossifov2014:0004	Iossifov2014_Embryonic
1407	Iossifov2014:0004	Iossifov2014_Embryonic
1434	Iossifov2014:0004	Iossifov2014_Embryonic
1445	Iossifov2014:0004	Iossifov2014_Embryonic
1452	Iossifov2014:0004	Iossifov2014_Embryonic
1454	Iossifov2014:0004	Iossifov2014_Embryonic
1457	Iossifov2014:0004	Iossifov2014_Embryonic
1459	Iossifov2014:0004	Iossifov2014_Embryonic
1462	Iossifov2014:0004	Iossifov2014_Embryonic
1466	Iossifov2014:0004	Iossifov2014_Embryonic
1477	Iossifov2014:0004	Iossifov2014_Embryonic
1479	Iossifov2014:0004	Iossifov2014_Embryonic
1525	Iossifov2014:0004	Iossifov2014_Embryonic
1627	Iossifov2014:0004	Iossifov2014_Embryonic
1630	Iossifov2014:0004	Iossifov2014_Embryonic
1633	Iossifov2014:0004	Iossifov2014_Embryonic
1655	Iossifov2014:0004	Iossifov2014_Embryonic
1656	Iossifov2014:0004	Iossifov2014_Embryonic
1659	Iossifov2014:0004	Iossifov2014_Embryonic
1660	Iossifov2014:0004	Iossifov2014_Embryonic
1665	Iossifov2014:0004	Iossifov2014_Embryonic
1725	Iossifov2014:0004	Iossifov2014_Embryonic
1781	Iossifov2014:0004	Iossifov2014_Embryonic
1786	Iossifov2014:0004	Iossifov2014_Embryonic
1788	Iossifov2014:0004	Iossifov2014_Embryonic
1809	Iossifov2014:0004	Iossifov2014_Embryonic
1822	Iossifov2014:0004	Iossifov2014_Embryonic
1829	Iossifov2014:0004	Iossifov2014_Embryonic
1857	Iossifov2014:0004	Iossifov2014_Embryonic
1859	Iossifov2014:0004	Iossifov2014_Embryonic
1870	Iossifov2014:0004	Iossifov2014_Embryonic
1875	Iossifov2014:0004	Iossifov2014_Embryonic
1894	Iossifov2014:0004	Iossifov2014_Embryonic
1938	Iossifov2014:0004	Iossifov2014_Embryonic
1943	Iossifov2014:0004	Iossifov2014_Embryonic
1945	Iossifov2014:0004	Iossifov2014_Embryonic
1948	Iossifov2014:0004	Iossifov2014_Embryonic
1951	Iossifov2014:0004	Iossifov2014_Embryonic
1965	Iossifov2014:0004	Iossifov2014_Embryonic
1973	Iossifov2014:0004	Iossifov2014_Embryonic
1978	Iossifov2014:0004	Iossifov2014_Embryonic
1979	Iossifov2014:0004	Iossifov2014_Embryonic
1982	Iossifov2014:0004	Iossifov2014_Embryonic
1994	Iossifov2014:0004	Iossifov2014_Embryonic
1995	Iossifov2014:0004	Iossifov2014_Embryonic
1998	Iossifov2014:0004	Iossifov2014_Embryonic
2009	Iossifov2014:0004	Iossifov2014_Embryonic
2033	Iossifov2014:0004	Iossifov2014_Embryonic
2035	Iossifov2014:0004	Iossifov2014_Embryonic
2042	Iossifov2014:0004	Iossifov2014_Embryonic
2044	Iossifov2014:0004	Iossifov2014_Embryonic
2045	Iossifov2014:0004	Iossifov2014_Embryonic
2048	Iossifov2014:0004	Iossifov2014_Embryonic
2054	Iossifov2014:0004	Iossifov2014_Embryonic
2058	Iossifov2014:0004	Iossifov2014_Embryonic
2072	Iossifov2014:0004	Iossifov2014_Embryonic
2079	Iossifov2014:0004	Iossifov2014_Embryonic
2091	Iossifov2014:0004	Iossifov2014_Embryonic
2132	Iossifov2014:0004	Iossifov2014_Embryonic
2146	Iossifov2014:0004	Iossifov2014_Embryonic
2149	Iossifov2014:0004	Iossifov2014_Embryonic
2175	Iossifov2014:0004	Iossifov2014_Embryonic
2176	Iossifov2014:0004	Iossifov2014_Embryonic
2177	Iossifov2014:0004	Iossifov2014_Embryonic
2178	Iossifov2014:0004	Iossifov2014_Embryonic
2186	Iossifov2014:0004	Iossifov2014_Embryonic
2188	Iossifov2014:0004	Iossifov2014_Embryonic
2189	Iossifov2014:0004	Iossifov2014_Embryonic
2192	Iossifov2014:0004	Iossifov2014_Embryonic
2222	Iossifov2014:0004	Iossifov2014_Embryonic
2305	Iossifov2014:0004	Iossifov2014_Embryonic
2339	Iossifov2014:0004	Iossifov2014_Embryonic
2535	Iossifov2014:0004	Iossifov2014_Embryonic
2551	Iossifov2014:0004	Iossifov2014_Embryonic
2553	Iossifov2014:0004	Iossifov2014_Embryonic
2589	Iossifov2014:0004	Iossifov2014_Embryonic
2618	Iossifov2014:0004	Iossifov2014_Embryonic
2665	Iossifov2014:0004	Iossifov2014_Embryonic
2673	Iossifov2014:0004	Iossifov2014_Embryonic
2773	Iossifov2014:0004	Iossifov2014_Embryonic
2776	Iossifov2014:0004	Iossifov2014_Embryonic
2835	Iossifov2014:0004	Iossifov2014_Embryonic
2842	Iossifov2014:0004	Iossifov2014_Embryonic
2882	Iossifov2014:0004	Iossifov2014_Embryonic
2932	Iossifov2014:0004	Iossifov2014_Embryonic
2935	Iossifov2014:0004	Iossifov2014_Embryonic
2941	Iossifov2014:0004	Iossifov2014_Embryonic
2956	Iossifov2014:0004	Iossifov2014_Embryonic
2969	Iossifov2014:0004	Iossifov2014_Embryonic
2976	Iossifov2014:0004	Iossifov2014_Embryonic
3005	Iossifov2014:0004	Iossifov2014_Embryonic
3021	Iossifov2014:0004	Iossifov2014_Embryonic
3035	Iossifov2014:0004	Iossifov2014_Embryonic
3062	Iossifov2014:0004	Iossifov2014_Embryonic
3066	Iossifov2014:0004	Iossifov2014_Embryonic
3068	Iossifov2014:0004	Iossifov2014_Embryonic
3070	Iossifov2014:0004	Iossifov2014_Embryonic
3091	Iossifov2014:0004	Iossifov2014_Embryonic
3148	Iossifov2014:0004	Iossifov2014_Embryonic
3156	Iossifov2014:0004	Iossifov2014_Embryonic
3161	Iossifov2014:0004	Iossifov2014_Embryonic
3182	Iossifov2014:0004	Iossifov2014_Embryonic
3184	Iossifov2014:0004	Iossifov2014_Embryonic
3185	Iossifov2014:0004	Iossifov2014_Embryonic
3187	Iossifov2014:0004	Iossifov2014_Embryonic
3189	Iossifov2014:0004	Iossifov2014_Embryonic
3190	Iossifov2014:0004	Iossifov2014_Embryonic
3192	Iossifov2014:0004	Iossifov2014_Embryonic
3275	Iossifov2014:0004	Iossifov2014_Embryonic
3298	Iossifov2014:0004	Iossifov2014_Embryonic
3321	Iossifov2014:0004	Iossifov2014_Embryonic
3417	Iossifov2014:0004	Iossifov2014_Embryonic
3480	Iossifov2014:0004	Iossifov2014_Embryonic
3485	Iossifov2014:0004	Iossifov2014_Embryonic
3608	Iossifov2014:0004	Iossifov2014_Embryonic
3609	Iossifov2014:0004	Iossifov2014_Embryonic
3615	Iossifov2014:0004	Iossifov2014_Embryonic
3643	Iossifov2014:0004	Iossifov2014_Embryonic
3658	Iossifov2014:0004	Iossifov2014_Embryonic
3703	Iossifov2014:0004	Iossifov2014_Embryonic
3728	Iossifov2014:0004	Iossifov2014_Embryonic
3735	Iossifov2014:0004	Iossifov2014_Embryonic
3796	Iossifov2014:0004	Iossifov2014_Embryonic
3832	Iossifov2014:0004	Iossifov2014_Embryonic
3835	Iossifov2014:0004	Iossifov2014_Embryonic
3836	Iossifov2014:0004	Iossifov2014_Embryonic
3839	Iossifov2014:0004	Iossifov2014_Embryonic
3840	Iossifov2014:0004	Iossifov2014_Embryonic
3841	Iossifov2014:0004	Iossifov2014_Embryonic
3842	Iossifov2014:0004	Iossifov2014_Embryonic
3843	Iossifov2014:0004	Iossifov2014_Embryonic
3899	Iossifov2014:0004	Iossifov2014_Embryonic
3930	Iossifov2014:0004	Iossifov2014_Embryonic
3978	Iossifov2014:0004	Iossifov2014_Embryonic
3980	Iossifov2014:0004	Iossifov2014_Embryonic
3998	Iossifov2014:0004	Iossifov2014_Embryonic
4001	Iossifov2014:0004	Iossifov2014_Embryonic
4040	Iossifov2014:0004	Iossifov2014_Embryonic
4041	Iossifov2014:0004	Iossifov2014_Embryonic
4076	Iossifov2014:0004	Iossifov2014_Embryonic
4082	Iossifov2014:0004	Iossifov2014_Embryonic
4085	Iossifov2014:0004	Iossifov2014_Embryonic
4086	Iossifov2014:0004	Iossifov2014_Embryonic
4087	Iossifov2014:0004	Iossifov2014_Embryonic
4089	Iossifov2014:0004	Iossifov2014_Embryonic
4131	Iossifov2014:0004	Iossifov2014_Embryonic
4139	Iossifov2014:0004	Iossifov2014_Embryonic
4140	Iossifov2014:0004	Iossifov2014_Embryonic
4157	Iossifov2014:0004	Iossifov2014_Embryonic
4171	Iossifov2014:0004	Iossifov2014_Embryonic
4172	Iossifov2014:0004	Iossifov2014_Embryonic
4173	Iossifov2014:0004	Iossifov2014_Embryonic
4174	Iossifov2014:0004	Iossifov2014_Embryonic
4175	Iossifov2014:0004	Iossifov2014_Embryonic
4176	Iossifov2014:0004	Iossifov2014_Embryonic
4192	Iossifov2014:0004	Iossifov2014_Embryonic
4193	Iossifov2014:0004	Iossifov2014_Embryonic
4212	Iossifov2014:0004	Iossifov2014_Embryonic
4221	Iossifov2014:0004	Iossifov2014_Embryonic
4237	Iossifov2014:0004	Iossifov2014_Embryonic
4238	Iossifov2014:0004	Iossifov2014_Embryonic
4242	Iossifov2014:0004	Iossifov2014_Embryonic
4246	Iossifov2014:0004	Iossifov2014_Embryonic
4288	Iossifov2014:0004	Iossifov2014_Embryonic
4292	Iossifov2014:0004	Iossifov2014_Embryonic
4300	Iossifov2014:0004	Iossifov2014_Embryonic
4301	Iossifov2014:0004	Iossifov2014_Embryonic
4325	Iossifov2014:0004	Iossifov2014_Embryonic
4330	Iossifov2014:0004	Iossifov2014_Embryonic
4356	Iossifov2014:0004	Iossifov2014_Embryonic
4436	Iossifov2014:0004	Iossifov2014_Embryonic
4440	Iossifov2014:0004	Iossifov2014_Embryonic
4605	Iossifov2014:0004	Iossifov2014_Embryonic
4609	Iossifov2014:0004	Iossifov2014_Embryonic
4613	Iossifov2014:0004	Iossifov2014_Embryonic
4615	Iossifov2014:0004	Iossifov2014_Embryonic
4661	Iossifov2014:0004	Iossifov2014_Embryonic
4677	Iossifov2014:0004	Iossifov2014_Embryonic
4684	Iossifov2014:0004	Iossifov2014_Embryonic
4686	Iossifov2014:0004	Iossifov2014_Embryonic
4751	Iossifov2014:0004	Iossifov2014_Embryonic
4756	Iossifov2014:0004	Iossifov2014_Embryonic
4762	Iossifov2014:0004	Iossifov2014_Embryonic
4774	Iossifov2014:0004	Iossifov2014_Embryonic
4781	Iossifov2014:0004	Iossifov2014_Embryonic
4800	Iossifov2014:0004	Iossifov2014_Embryonic
4826	Iossifov2014:0004	Iossifov2014_Embryonic
4839	Iossifov2014:0004	Iossifov2014_Embryonic
4848	Iossifov2014:0004	Iossifov2014_Embryonic
4849	Iossifov2014:0004	Iossifov2014_Embryonic
4863	Iossifov2014:0004	Iossifov2014_Embryonic
4883	Iossifov2014:0004	Iossifov2014_Embryonic
4893	Iossifov2014:0004	Iossifov2014_Embryonic
4927	Iossifov2014:0004	Iossifov2014_Embryonic
4931	Iossifov2014:0004	Iossifov2014_Embryonic
4953	Iossifov2014:0004	Iossifov2014_Embryonic
4957	Iossifov2014:0004	Iossifov2014_Embryonic
4998	Iossifov2014:0004	Iossifov2014_Embryonic
5000	Iossifov2014:0004	Iossifov2014_Embryonic
5018	Iossifov2014:0004	Iossifov2014_Embryonic
5049	Iossifov2014:0004	Iossifov2014_Embryonic
5050	Iossifov2014:0004	Iossifov2014_Embryonic
5062	Iossifov2014:0004	Iossifov2014_Embryonic
5082	Iossifov2014:0004	Iossifov2014_Embryonic
5087	Iossifov2014:0004	Iossifov2014_Embryonic
5094	Iossifov2014:0004	Iossifov2014_Embryonic
5108	Iossifov2014:0004	Iossifov2014_Embryonic
5111	Iossifov2014:0004	Iossifov2014_Embryonic
5150	Iossifov2014:0004	Iossifov2014_Embryonic
5152	Iossifov2014:0004	Iossifov2014_Embryonic
5194	Iossifov2014:0004	Iossifov2014_Embryonic
5226	Iossifov2014:0004	Iossifov2014_Embryonic
5253	Iossifov2014:0004	Iossifov2014_Embryonic
5287	Iossifov2014:0004	Iossifov2014_Embryonic
5290	Iossifov2014:0004	Iossifov2014_Embryonic
5292	Iossifov2014:0004	Iossifov2014_Embryonic
5296	Iossifov2014:0004	Iossifov2014_Embryonic
5324	Iossifov2014:0004	Iossifov2014_Embryonic
5326	Iossifov2014:0004	Iossifov2014_Embryonic
5335	Iossifov2014:0004	Iossifov2014_Embryonic
5347	Iossifov2014:0004	Iossifov2014_Embryonic
5356	Iossifov2014:0004	Iossifov2014_Embryonic
5362	Iossifov2014:0004	Iossifov2014_Embryonic
5393	Iossifov2014:0004	Iossifov2014_Embryonic
5423	Iossifov2014:0004	Iossifov2014_Embryonic
5424	Iossifov2014:0004	Iossifov2014_Embryonic
5427	Iossifov2014:0004	Iossifov2014_Embryonic
5431	Iossifov2014:0004	Iossifov2014_Embryonic
5469	Iossifov2014:0004	Iossifov2014_Embryonic
5471	Iossifov2014:0004	Iossifov2014_Embryonic
5496	Iossifov2014:0004	Iossifov2014_Embryonic
5500	Iossifov2014:0004	Iossifov2014_Embryonic
5501	Iossifov2014:0004	Iossifov2014_Embryonic
5515	Iossifov2014:0004	Iossifov2014_Embryonic
5523	Iossifov2014:0004	Iossifov2014_Embryonic
5529	Iossifov2014:0004	Iossifov2014_Embryonic
5531	Iossifov2014:0004	Iossifov2014_Embryonic
5557	Iossifov2014:0004	Iossifov2014_Embryonic
5558	Iossifov2014:0004	Iossifov2014_Embryonic
5565	Iossifov2014:0004	Iossifov2014_Embryonic
5576	Iossifov2014:0004	Iossifov2014_Embryonic
5577	Iossifov2014:0004	Iossifov2014_Embryonic
5591	Iossifov2014:0004	Iossifov2014_Embryonic
5597	Iossifov2014:0004	Iossifov2014_Embryonic
5598	Iossifov2014:0004	Iossifov2014_Embryonic
5599	Iossifov2014:0004	Iossifov2014_Embryonic
5636	Iossifov2014:0004	Iossifov2014_Embryonic
5683	Iossifov2014:0004	Iossifov2014_Embryonic
5693	Iossifov2014:0004	Iossifov2014_Embryonic
5704	Iossifov2014:0004	Iossifov2014_Embryonic
5711	Iossifov2014:0004	Iossifov2014_Embryonic
5725	Iossifov2014:0004	Iossifov2014_Embryonic
5780	Iossifov2014:0004	Iossifov2014_Embryonic
5800	Iossifov2014:0004	Iossifov2014_Embryonic
5802	Iossifov2014:0004	Iossifov2014_Embryonic
5832	Iossifov2014:0004	Iossifov2014_Embryonic
5859	Iossifov2014:0004	Iossifov2014_Embryonic
5881	Iossifov2014:0004	Iossifov2014_Embryonic
5888	Iossifov2014:0004	Iossifov2014_Embryonic
5894	Iossifov2014:0004	Iossifov2014_Embryonic
5917	Iossifov2014:0004	Iossifov2014_Embryonic
5925	Iossifov2014:0004	Iossifov2014_Embryonic
5926	Iossifov2014:0004	Iossifov2014_Embryonic
5927	Iossifov2014:0004	Iossifov2014_Embryonic
5930	Iossifov2014:0004	Iossifov2014_Embryonic
5933	Iossifov2014:0004	Iossifov2014_Embryonic
5936	Iossifov2014:0004	Iossifov2014_Embryonic
5982	Iossifov2014:0004	Iossifov2014_Embryonic
5984	Iossifov2014:0004	Iossifov2014_Embryonic
5991	Iossifov2014:0004	Iossifov2014_Embryonic
6016	Iossifov2014:0004	Iossifov2014_Embryonic
6018	Iossifov2014:0004	Iossifov2014_Embryonic
6045	Iossifov2014:0004	Iossifov2014_Embryonic
6059	Iossifov2014:0004	Iossifov2014_Embryonic
6091	Iossifov2014:0004	Iossifov2014_Embryonic
6132	Iossifov2014:0004	Iossifov2014_Embryonic
6133	Iossifov2014:0004	Iossifov2014_Embryonic
6135	Iossifov2014:0004	Iossifov2014_Embryonic
6138	Iossifov2014:0004	Iossifov2014_Embryonic
6141	Iossifov2014:0004	Iossifov2014_Embryonic
6146	Iossifov2014:0004	Iossifov2014_Embryonic
6156	Iossifov2014:0004	Iossifov2014_Embryonic
6185	Iossifov2014:0004	Iossifov2014_Embryonic
6210	Iossifov2014:0004	Iossifov2014_Embryonic
6235	Iossifov2014:0004	Iossifov2014_Embryonic
6240	Iossifov2014:0004	Iossifov2014_Embryonic
6241	Iossifov2014:0004	Iossifov2014_Embryonic
6328	Iossifov2014:0004	Iossifov2014_Embryonic
6418	Iossifov2014:0004	Iossifov2014_Embryonic
6419	Iossifov2014:0004	Iossifov2014_Embryonic
6421	Iossifov2014:0004	Iossifov2014_Embryonic
6422	Iossifov2014:0004	Iossifov2014_Embryonic
6426	Iossifov2014:0004	Iossifov2014_Embryonic
6429	Iossifov2014:0004	Iossifov2014_Embryonic
6432	Iossifov2014:0004	Iossifov2014_Embryonic
6434	Iossifov2014:0004	Iossifov2014_Embryonic
6443	Iossifov2014:0004	Iossifov2014_Embryonic
6461	Iossifov2014:0004	Iossifov2014_Embryonic
6477	Iossifov2014:0004	Iossifov2014_Embryonic
6482	Iossifov2014:0004	Iossifov2014_Embryonic
6491	Iossifov2014:0004	Iossifov2014_Embryonic
6502	Iossifov2014:0004	Iossifov2014_Embryonic
6503	Iossifov2014:0004	Iossifov2014_Embryonic
6591	Iossifov2014:0004	Iossifov2014_Embryonic
6596	Iossifov2014:0004	Iossifov2014_Embryonic
6597	Iossifov2014:0004	Iossifov2014_Embryonic
6598	Iossifov2014:0004	Iossifov2014_Embryonic
6599	Iossifov2014:0004	Iossifov2014_Embryonic
6602	Iossifov2014:0004	Iossifov2014_Embryonic
6605	Iossifov2014:0004	Iossifov2014_Embryonic
6608	Iossifov2014:0004	Iossifov2014_Embryonic
6626	Iossifov2014:0004	Iossifov2014_Embryonic
6654	Iossifov2014:0004	Iossifov2014_Embryonic
6656	Iossifov2014:0004	Iossifov2014_Embryonic
6659	Iossifov2014:0004	Iossifov2014_Embryonic
6660	Iossifov2014:0004	Iossifov2014_Embryonic
6664	Iossifov2014:0004	Iossifov2014_Embryonic
6666	Iossifov2014:0004	Iossifov2014_Embryonic
6670	Iossifov2014:0004	Iossifov2014_Embryonic
6671	Iossifov2014:0004	Iossifov2014_Embryonic
6683	Iossifov2014:0004	Iossifov2014_Embryonic
6713	Iossifov2014:0004	Iossifov2014_Embryonic
6714	Iossifov2014:0004	Iossifov2014_Embryonic
6715	Iossifov2014:0004	Iossifov2014_Embryonic
6731	Iossifov2014:0004	Iossifov2014_Embryonic
6732	Iossifov2014:0004	Iossifov2014_Embryonic
6738	Iossifov2014:0004	Iossifov2014_Embryonic
6745	Iossifov2014:0004	Iossifov2014_Embryonic
6746	Iossifov2014:0004	Iossifov2014_Embryonic
6749	Iossifov2014:0004	Iossifov2014_Embryonic
6780	Iossifov2014:0004	Iossifov2014_Embryonic
6782	Iossifov2014:0004	Iossifov2014_Embryonic
6790	Iossifov2014:0004	Iossifov2014_Embryonic
6815	Iossifov2014:0004	Iossifov2014_Embryonic
6832	Iossifov2014:0004	Iossifov2014_Embryonic
6840	Iossifov2014:0004	Iossifov2014_Embryonic
6873	Iossifov2014:0004	Iossifov2014_Embryonic
6874	Iossifov2014:0004	Iossifov2014_Embryonic
6877	Iossifov2014:0004	Iossifov2014_Embryonic
6924	Iossifov2014:0004	Iossifov2014_Embryonic
6929	Iossifov2014:0004	Iossifov2014_Embryonic
6944	Iossifov2014:0004	Iossifov2014_Embryonic
6950	Iossifov2014:0004	Iossifov2014_Embryonic
6993	Iossifov2014:0004	Iossifov2014_Embryonic
6996	Iossifov2014:0004	Iossifov2014_Embryonic
7019	Iossifov2014:0004	Iossifov2014_Embryonic
7022	Iossifov2014:0004	Iossifov2014_Embryonic
7046	Iossifov2014:0004	Iossifov2014_Embryonic
7072	Iossifov2014:0004	Iossifov2014_Embryonic
7083	Iossifov2014:0004	Iossifov2014_Embryonic
7090	Iossifov2014:0004	Iossifov2014_Embryonic
7112	Iossifov2014:0004	Iossifov2014_Embryonic
7150	Iossifov2014:0004	Iossifov2014_Embryonic
7153	Iossifov2014:0004	Iossifov2014_Embryonic
7155	Iossifov2014:0004	Iossifov2014_Embryonic
7156	Iossifov2014:0004	Iossifov2014_Embryonic
7157	Iossifov2014:0004	Iossifov2014_Embryonic
7158	Iossifov2014:0004	Iossifov2014_Embryonic
7174	Iossifov2014:0004	Iossifov2014_Embryonic
7175	Iossifov2014:0004	Iossifov2014_Embryonic
7178	Iossifov2014:0004	Iossifov2014_Embryonic
7182	Iossifov2014:0004	Iossifov2014_Embryonic
7203	Iossifov2014:0004	Iossifov2014_Embryonic
7204	Iossifov2014:0004	Iossifov2014_Embryonic
7249	Iossifov2014:0004	Iossifov2014_Embryonic
7251	Iossifov2014:0004	Iossifov2014_Embryonic
7267	Iossifov2014:0004	Iossifov2014_Embryonic
7272	Iossifov2014:0004	Iossifov2014_Embryonic
7321	Iossifov2014:0004	Iossifov2014_Embryonic
7326	Iossifov2014:0004	Iossifov2014_Embryonic
7337	Iossifov2014:0004	Iossifov2014_Embryonic
7351	Iossifov2014:0004	Iossifov2014_Embryonic
7357	Iossifov2014:0004	Iossifov2014_Embryonic
7358	Iossifov2014:0004	Iossifov2014_Embryonic
7372	Iossifov2014:0004	Iossifov2014_Embryonic
7374	Iossifov2014:0004	Iossifov2014_Embryonic
7391	Iossifov2014:0004	Iossifov2014_Embryonic
7398	Iossifov2014:0004	Iossifov2014_Embryonic
7410	Iossifov2014:0004	Iossifov2014_Embryonic
7443	Iossifov2014:0004	Iossifov2014_Embryonic
7465	Iossifov2014:0004	Iossifov2014_Embryonic
7468	Iossifov2014:0004	Iossifov2014_Embryonic
7486	Iossifov2014:0004	Iossifov2014_Embryonic
7514	Iossifov2014:0004	Iossifov2014_Embryonic
7515	Iossifov2014:0004	Iossifov2014_Embryonic
7520	Iossifov2014:0004	Iossifov2014_Embryonic
7539	Iossifov2014:0004	Iossifov2014_Embryonic
7551	Iossifov2014:0004	Iossifov2014_Embryonic
7554	Iossifov2014:0004	Iossifov2014_Embryonic
7556	Iossifov2014:0004	Iossifov2014_Embryonic
7568	Iossifov2014:0004	Iossifov2014_Embryonic
7570	Iossifov2014:0004	Iossifov2014_Embryonic
7581	Iossifov2014:0004	Iossifov2014_Embryonic
7589	Iossifov2014:0004	Iossifov2014_Embryonic
7594	Iossifov2014:0004	Iossifov2014_Embryonic
7596	Iossifov2014:0004	Iossifov2014_Embryonic
7597	Iossifov2014:0004	Iossifov2014_Embryonic
7625	Iossifov2014:0004	Iossifov2014_Embryonic
7633	Iossifov2014:0004	Iossifov2014_Embryonic
7637	Iossifov2014:0004	Iossifov2014_Embryonic
7644	Iossifov2014:0004	Iossifov2014_Embryonic
7678	Iossifov2014:0004	Iossifov2014_Embryonic
7690	Iossifov2014:0004	Iossifov2014_Embryonic
7695	Iossifov2014:0004	Iossifov2014_Embryonic
7699	Iossifov2014:0004	Iossifov2014_Embryonic
7700	Iossifov2014:0004	Iossifov2014_Embryonic
7702	Iossifov2014:0004	Iossifov2014_Embryonic
7703	Iossifov2014:0004	Iossifov2014_Embryonic
7707	Iossifov2014:0004	Iossifov2014_Embryonic
7716	Iossifov2014:0004	Iossifov2014_Embryonic
7748	Iossifov2014:0004	Iossifov2014_Embryonic
7750	Iossifov2014:0004	Iossifov2014_Embryonic
7753	Iossifov2014:0004	Iossifov2014_Embryonic
7764	Iossifov2014:0004	Iossifov2014_Embryonic
7775	Iossifov2014:0004	Iossifov2014_Embryonic
7803	Iossifov2014:0004	Iossifov2014_Embryonic
7812	Iossifov2014:0004	Iossifov2014_Embryonic
7840	Iossifov2014:0004	Iossifov2014_Embryonic
7846	Iossifov2014:0004	Iossifov2014_Embryonic
7852	Iossifov2014:0004	Iossifov2014_Embryonic
7862	Iossifov2014:0004	Iossifov2014_Embryonic
7903	Iossifov2014:0004	Iossifov2014_Embryonic
7913	Iossifov2014:0004	Iossifov2014_Embryonic
7982	Iossifov2014:0004	Iossifov2014_Embryonic
7994	Iossifov2014:0004	Iossifov2014_Embryonic
8019	Iossifov2014:0004	Iossifov2014_Embryonic
8021	Iossifov2014:0004	Iossifov2014_Embryonic
8028	Iossifov2014:0004	Iossifov2014_Embryonic
8036	Iossifov2014:0004	Iossifov2014_Embryonic
8086	Iossifov2014:0004	Iossifov2014_Embryonic
8091	Iossifov2014:0004	Iossifov2014_Embryonic
8125	Iossifov2014:0004	Iossifov2014_Embryonic
8128	Iossifov2014:0004	Iossifov2014_Embryonic
8161	Iossifov2014:0004	Iossifov2014_Embryonic
8193	Iossifov2014:0004	Iossifov2014_Embryonic
8202	Iossifov2014:0004	Iossifov2014_Embryonic
8220	Iossifov2014:0004	Iossifov2014_Embryonic
8289	Iossifov2014:0004	Iossifov2014_Embryonic
8290	Iossifov2014:0004	Iossifov2014_Embryonic
8295	Iossifov2014:0004	Iossifov2014_Embryonic
8318	Iossifov2014:0004	Iossifov2014_Embryonic
8417	Iossifov2014:0004	Iossifov2014_Embryonic
8427	Iossifov2014:0004	Iossifov2014_Embryonic
8440	Iossifov2014:0004	Iossifov2014_Embryonic
8443	Iossifov2014:0004	Iossifov2014_Embryonic
8445	Iossifov2014:0004	Iossifov2014_Embryonic
8446	Iossifov2014:0004	Iossifov2014_Embryonic
8452	Iossifov2014:0004	Iossifov2014_Embryonic
8454	Iossifov2014:0004	Iossifov2014_Embryonic
8462	Iossifov2014:0004	Iossifov2014_Embryonic
8463	Iossifov2014:0004	Iossifov2014_Embryonic
8480	Iossifov2014:0004	Iossifov2014_Embryonic
8493	Iossifov2014:0004	Iossifov2014_Embryonic
8508	Iossifov2014:0004	Iossifov2014_Embryonic
8527	Iossifov2014:0004	Iossifov2014_Embryonic
8545	Iossifov2014:0004	Iossifov2014_Embryonic
8570	Iossifov2014:0004	Iossifov2014_Embryonic
8577	Iossifov2014:0004	Iossifov2014_Embryonic
8603	Iossifov2014:0004	Iossifov2014_Embryonic
8607	Iossifov2014:0004	Iossifov2014_Embryonic
8609	Iossifov2014:0004	Iossifov2014_Embryonic
8642	Iossifov2014:0004	Iossifov2014_Embryonic
8649	Iossifov2014:0004	Iossifov2014_Embryonic
8658	Iossifov2014:0004	Iossifov2014_Embryonic
8661	Iossifov2014:0004	Iossifov2014_Embryonic
8664	Iossifov2014:0004	Iossifov2014_Embryonic
8667	Iossifov2014:0004	Iossifov2014_Embryonic
8690	Iossifov2014:0004	Iossifov2014_Embryonic
8703	Iossifov2014:0004	Iossifov2014_Embryonic
8715	Iossifov2014:0004	Iossifov2014_Embryonic
8723	Iossifov2014:0004	Iossifov2014_Embryonic
8731	Iossifov2014:0004	Iossifov2014_Embryonic
8732	Iossifov2014:0004	Iossifov2014_Embryonic
8761	Iossifov2014:0004	Iossifov2014_Embryonic
8805	Iossifov2014:0004	Iossifov2014_Embryonic
8816	Iossifov2014:0004	Iossifov2014_Embryonic
8833	Iossifov2014:0004	Iossifov2014_Embryonic
8841	Iossifov2014:0004	Iossifov2014_Embryonic
8851	Iossifov2014:0004	Iossifov2014_Embryonic
8861	Iossifov2014:0004	Iossifov2014_Embryonic
8880	Iossifov2014:0004	Iossifov2014_Embryonic
8886	Iossifov2014:0004	Iossifov2014_Embryonic
8895	Iossifov2014:0004	Iossifov2014_Embryonic
8897	Iossifov2014:0004	Iossifov2014_Embryonic
8904	Iossifov2014:0004	Iossifov2014_Embryonic
8914	Iossifov2014:0004	Iossifov2014_Embryonic
8915	Iossifov2014:0004	Iossifov2014_Embryonic
8971	Iossifov2014:0004	Iossifov2014_Embryonic
8994	Iossifov2014:0004	Iossifov2014_Embryonic
9019	Iossifov2014:0004	Iossifov2014_Embryonic
9031	Iossifov2014:0004	Iossifov2014_Embryonic
9044	Iossifov2014:0004	Iossifov2014_Embryonic
9055	Iossifov2014:0004	Iossifov2014_Embryonic
9057	Iossifov2014:0004	Iossifov2014_Embryonic
9100	Iossifov2014:0004	Iossifov2014_Embryonic
9110	Iossifov2014:0004	Iossifov2014_Embryonic
9113	Iossifov2014:0004	Iossifov2014_Embryonic
9118	Iossifov2014:0004	Iossifov2014_Embryonic
9125	Iossifov2014:0004	Iossifov2014_Embryonic
9126	Iossifov2014:0004	Iossifov2014_Embryonic
9128	Iossifov2014:0004	Iossifov2014_Embryonic
9133	Iossifov2014:0004	Iossifov2014_Embryonic
9156	Iossifov2014:0004	Iossifov2014_Embryonic
9170	Iossifov2014:0004	Iossifov2014_Embryonic
9179	Iossifov2014:0004	Iossifov2014_Embryonic
9184	Iossifov2014:0004	Iossifov2014_Embryonic
9188	Iossifov2014:0004	Iossifov2014_Embryonic
9191	Iossifov2014:0004	Iossifov2014_Embryonic
9202	Iossifov2014:0004	Iossifov2014_Embryonic
9212	Iossifov2014:0004	Iossifov2014_Embryonic
9213	Iossifov2014:0004	Iossifov2014_Embryonic
9218	Iossifov2014:0004	Iossifov2014_Embryonic
9219	Iossifov2014:0004	Iossifov2014_Embryonic
9221	Iossifov2014:0004	Iossifov2014_Embryonic
9231	Iossifov2014:0004	Iossifov2014_Embryonic
9232	Iossifov2014:0004	Iossifov2014_Embryonic
9266	Iossifov2014:0004	Iossifov2014_Embryonic
9310	Iossifov2014:0004	Iossifov2014_Embryonic
9312	Iossifov2014:0004	Iossifov2014_Embryonic
9315	Iossifov2014:0004	Iossifov2014_Embryonic
9318	Iossifov2014:0004	Iossifov2014_Embryonic
9319	Iossifov2014:0004	Iossifov2014_Embryonic
9322	Iossifov2014:0004	Iossifov2014_Embryonic
9329	Iossifov2014:0004	Iossifov2014_Embryonic
9330	Iossifov2014:0004	Iossifov2014_Embryonic
9334	Iossifov2014:0004	Iossifov2014_Embryonic
9337	Iossifov2014:0004	Iossifov2014_Embryonic
9343	Iossifov2014:0004	Iossifov2014_Embryonic
9373	Iossifov2014:0004	Iossifov2014_Embryonic
9388	Iossifov2014:0004	Iossifov2014_Embryonic
9392	Iossifov2014:0004	Iossifov2014_Embryonic
9416	Iossifov2014:0004	Iossifov2014_Embryonic
9422	Iossifov2014:0004	Iossifov2014_Embryonic
9439	Iossifov2014:0004	Iossifov2014_Embryonic
9440	Iossifov2014:0004	Iossifov2014_Embryonic
9447	Iossifov2014:0004	Iossifov2014_Embryonic
9451	Iossifov2014:0004	Iossifov2014_Embryonic
9493	Iossifov2014:0004	Iossifov2014_Embryonic
9522	Iossifov2014:0004	Iossifov2014_Embryonic
9537	Iossifov2014:0004	Iossifov2014_Embryonic
9543	Iossifov2014:0004	Iossifov2014_Embryonic
9555	Iossifov2014:0004	Iossifov2014_Embryonic
9562	Iossifov2014:0004	Iossifov2014_Embryonic
9567	Iossifov2014:0004	Iossifov2014_Embryonic
9585	Iossifov2014:0004	Iossifov2014_Embryonic
9589	Iossifov2014:0004	Iossifov2014_Embryonic
9611	Iossifov2014:0004	Iossifov2014_Embryonic
9618	Iossifov2014:0004	Iossifov2014_Embryonic
9620	Iossifov2014:0004	Iossifov2014_Embryonic
9627	Iossifov2014:0004	Iossifov2014_Embryonic
9631	Iossifov2014:0004	Iossifov2014_Embryonic
9632	Iossifov2014:0004	Iossifov2014_Embryonic
9646	Iossifov2014:0004	Iossifov2014_Embryonic
9649	Iossifov2014:0004	Iossifov2014_Embryonic
9650	Iossifov2014:0004	Iossifov2014_Embryonic
9662	Iossifov2014:0004	Iossifov2014_Embryonic
9675	Iossifov2014:0004	Iossifov2014_Embryonic
9678	Iossifov2014:0004	Iossifov2014_Embryonic
9682	Iossifov2014:0004	Iossifov2014_Embryonic
9683	Iossifov2014:0004	Iossifov2014_Embryonic
9689	Iossifov2014:0004	Iossifov2014_Embryonic
9698	Iossifov2014:0004	Iossifov2014_Embryonic
9700	Iossifov2014:0004	Iossifov2014_Embryonic
9702	Iossifov2014:0004	Iossifov2014_Embryonic
9710	Iossifov2014:0004	Iossifov2014_Embryonic
9716	Iossifov2014:0004	Iossifov2014_Embryonic
9730	Iossifov2014:0004	Iossifov2014_Embryonic
9733	Iossifov2014:0004	Iossifov2014_Embryonic
9735	Iossifov2014:0004	Iossifov2014_Embryonic
9736	Iossifov2014:0004	Iossifov2014_Embryonic
9742	Iossifov2014:0004	Iossifov2014_Embryonic
9768	Iossifov2014:0004	Iossifov2014_Embryonic
9774	Iossifov2014:0004	Iossifov2014_Embryonic
9775	Iossifov2014:0004	Iossifov2014_Embryonic
9782	Iossifov2014:0004	Iossifov2014_Embryonic
9786	Iossifov2014:0004	Iossifov2014_Embryonic
9787	Iossifov2014:0004	Iossifov2014_Embryonic
9788	Iossifov2014:0004	Iossifov2014_Embryonic
9791	Iossifov2014:0004	Iossifov2014_Embryonic
9793	Iossifov2014:0004	Iossifov2014_Embryonic
9810	Iossifov2014:0004	Iossifov2014_Embryonic
9818	Iossifov2014:0004	Iossifov2014_Embryonic
9820	Iossifov2014:0004	Iossifov2014_Embryonic
9824	Iossifov2014:0004	Iossifov2014_Embryonic
9831	Iossifov2014:0004	Iossifov2014_Embryonic
9832	Iossifov2014:0004	Iossifov2014_Embryonic
9833	Iossifov2014:0004	Iossifov2014_Embryonic
9836	Iossifov2014:0004	Iossifov2014_Embryonic
9837	Iossifov2014:0004	Iossifov2014_Embryonic
9852	Iossifov2014:0004	Iossifov2014_Embryonic
9859	Iossifov2014:0004	Iossifov2014_Embryonic
9860	Iossifov2014:0004	Iossifov2014_Embryonic
9869	Iossifov2014:0004	Iossifov2014_Embryonic
9873	Iossifov2014:0004	Iossifov2014_Embryonic
9879	Iossifov2014:0004	Iossifov2014_Embryonic
9880	Iossifov2014:0004	Iossifov2014_Embryonic
9889	Iossifov2014:0004	Iossifov2014_Embryonic
9898	Iossifov2014:0004	Iossifov2014_Embryonic
9918	Iossifov2014:0004	Iossifov2014_Embryonic
9923	Iossifov2014:0004	Iossifov2014_Embryonic
9925	Iossifov2014:0004	Iossifov2014_Embryonic
9928	Iossifov2014:0004	Iossifov2014_Embryonic
9960	Iossifov2014:0004	Iossifov2014_Embryonic
9967	Iossifov2014:0004	Iossifov2014_Embryonic
9969	Iossifov2014:0004	Iossifov2014_Embryonic
9972	Iossifov2014:0004	Iossifov2014_Embryonic
9980	Iossifov2014:0004	Iossifov2014_Embryonic
9985	Iossifov2014:0004	Iossifov2014_Embryonic
9989	Iossifov2014:0004	Iossifov2014_Embryonic
9990	Iossifov2014:0004	Iossifov2014_Embryonic
9994	Iossifov2014:0004	Iossifov2014_Embryonic
10024	Iossifov2014:0004	Iossifov2014_Embryonic
10036	Iossifov2014:0004	Iossifov2014_Embryonic
10042	Iossifov2014:0004	Iossifov2014_Embryonic
10051	Iossifov2014:0004	Iossifov2014_Embryonic
10052	Iossifov2014:0004	Iossifov2014_Embryonic
10056	Iossifov2014:0004	Iossifov2014_Embryonic
10072	Iossifov2014:0004	Iossifov2014_Embryonic
10082	Iossifov2014:0004	Iossifov2014_Embryonic
10096	Iossifov2014:0004	Iossifov2014_Embryonic
10100	Iossifov2014:0004	Iossifov2014_Embryonic
10112	Iossifov2014:0004	Iossifov2014_Embryonic
10116	Iossifov2014:0004	Iossifov2014_Embryonic
10121	Iossifov2014:0004	Iossifov2014_Embryonic
10142	Iossifov2014:0004	Iossifov2014_Embryonic
10155	Iossifov2014:0004	Iossifov2014_Embryonic
10160	Iossifov2014:0004	Iossifov2014_Embryonic
10168	Iossifov2014:0004	Iossifov2014_Embryonic
10179	Iossifov2014:0004	Iossifov2014_Embryonic
10197	Iossifov2014:0004	Iossifov2014_Embryonic
10206	Iossifov2014:0004	Iossifov2014_Embryonic
10208	Iossifov2014:0004	Iossifov2014_Embryonic
10210	Iossifov2014:0004	Iossifov2014_Embryonic
10236	Iossifov2014:0004	Iossifov2014_Embryonic
10238	Iossifov2014:0004	Iossifov2014_Embryonic
10274	Iossifov2014:0004	Iossifov2014_Embryonic
10280	Iossifov2014:0004	Iossifov2014_Embryonic
10285	Iossifov2014:0004	Iossifov2014_Embryonic
10327	Iossifov2014:0004	Iossifov2014_Embryonic
10336	Iossifov2014:0004	Iossifov2014_Embryonic
10371	Iossifov2014:0004	Iossifov2014_Embryonic
10399	Iossifov2014:0004	Iossifov2014_Embryonic
10403	Iossifov2014:0004	Iossifov2014_Embryonic
10409	Iossifov2014:0004	Iossifov2014_Embryonic
10419	Iossifov2014:0004	Iossifov2014_Embryonic
10427	Iossifov2014:0004	Iossifov2014_Embryonic
10459	Iossifov2014:0004	Iossifov2014_Embryonic
10460	Iossifov2014:0004	Iossifov2014_Embryonic
10464	Iossifov2014:0004	Iossifov2014_Embryonic
10478	Iossifov2014:0004	Iossifov2014_Embryonic
10480	Iossifov2014:0004	Iossifov2014_Embryonic
10492	Iossifov2014:0004	Iossifov2014_Embryonic
10493	Iossifov2014:0004	Iossifov2014_Embryonic
10498	Iossifov2014:0004	Iossifov2014_Embryonic
10499	Iossifov2014:0004	Iossifov2014_Embryonic
10500	Iossifov2014:0004	Iossifov2014_Embryonic
10512	Iossifov2014:0004	Iossifov2014_Embryonic
10518	Iossifov2014:0004	Iossifov2014_Embryonic
10521	Iossifov2014:0004	Iossifov2014_Embryonic
10527	Iossifov2014:0004	Iossifov2014_Embryonic
10535	Iossifov2014:0004	Iossifov2014_Embryonic
10540	Iossifov2014:0004	Iossifov2014_Embryonic
10556	Iossifov2014:0004	Iossifov2014_Embryonic
10560	Iossifov2014:0004	Iossifov2014_Embryonic
10565	Iossifov2014:0004	Iossifov2014_Embryonic
10570	Iossifov2014:0004	Iossifov2014_Embryonic
10575	Iossifov2014:0004	Iossifov2014_Embryonic
10576	Iossifov2014:0004	Iossifov2014_Embryonic
10592	Iossifov2014:0004	Iossifov2014_Embryonic
10594	Iossifov2014:0004	Iossifov2014_Embryonic
10602	Iossifov2014:0004	Iossifov2014_Embryonic
10603	Iossifov2014:0004	Iossifov2014_Embryonic
10615	Iossifov2014:0004	Iossifov2014_Embryonic
10623	Iossifov2014:0004	Iossifov2014_Embryonic
10625	Iossifov2014:0004	Iossifov2014_Embryonic
10635	Iossifov2014:0004	Iossifov2014_Embryonic
10640	Iossifov2014:0004	Iossifov2014_Embryonic
10642	Iossifov2014:0004	Iossifov2014_Embryonic
10643	Iossifov2014:0004	Iossifov2014_Embryonic
10657	Iossifov2014:0004	Iossifov2014_Embryonic
10658	Iossifov2014:0004	Iossifov2014_Embryonic
10659	Iossifov2014:0004	Iossifov2014_Embryonic
10664	Iossifov2014:0004	Iossifov2014_Embryonic
10672	Iossifov2014:0004	Iossifov2014_Embryonic
10683	Iossifov2014:0004	Iossifov2014_Embryonic
10691	Iossifov2014:0004	Iossifov2014_Embryonic
10713	Iossifov2014:0004	Iossifov2014_Embryonic
10714	Iossifov2014:0004	Iossifov2014_Embryonic
10721	Iossifov2014:0004	Iossifov2014_Embryonic
10733	Iossifov2014:0004	Iossifov2014_Embryonic
10741	Iossifov2014:0004	Iossifov2014_Embryonic
10765	Iossifov2014:0004	Iossifov2014_Embryonic
10773	Iossifov2014:0004	Iossifov2014_Embryonic
10780	Iossifov2014:0004	Iossifov2014_Embryonic
10788	Iossifov2014:0004	Iossifov2014_Embryonic
10794	Iossifov2014:0004	Iossifov2014_Embryonic
10797	Iossifov2014:0004	Iossifov2014_Embryonic
10802	Iossifov2014:0004	Iossifov2014_Embryonic
10847	Iossifov2014:0004	Iossifov2014_Embryonic
10885	Iossifov2014:0004	Iossifov2014_Embryonic
10890	Iossifov2014:0004	Iossifov2014_Embryonic
10893	Iossifov2014:0004	Iossifov2014_Embryonic
10902	Iossifov2014:0004	Iossifov2014_Embryonic
10906	Iossifov2014:0004	Iossifov2014_Embryonic
10914	Iossifov2014:0004	Iossifov2014_Embryonic
10915	Iossifov2014:0004	Iossifov2014_Embryonic
10927	Iossifov2014:0004	Iossifov2014_Embryonic
10945	Iossifov2014:0004	Iossifov2014_Embryonic
10949	Iossifov2014:0004	Iossifov2014_Embryonic
10956	Iossifov2014:0004	Iossifov2014_Embryonic
10962	Iossifov2014:0004	Iossifov2014_Embryonic
10971	Iossifov2014:0004	Iossifov2014_Embryonic
10983	Iossifov2014:0004	Iossifov2014_Embryonic
11004	Iossifov2014:0004	Iossifov2014_Embryonic
11014	Iossifov2014:0004	Iossifov2014_Embryonic
11051	Iossifov2014:0004	Iossifov2014_Embryonic
11052	Iossifov2014:0004	Iossifov2014_Embryonic
11056	Iossifov2014:0004	Iossifov2014_Embryonic
11073	Iossifov2014:0004	Iossifov2014_Embryonic
11075	Iossifov2014:0004	Iossifov2014_Embryonic
11100	Iossifov2014:0004	Iossifov2014_Embryonic
11104	Iossifov2014:0004	Iossifov2014_Embryonic
11128	Iossifov2014:0004	Iossifov2014_Embryonic
11130	Iossifov2014:0004	Iossifov2014_Embryonic
11137	Iossifov2014:0004	Iossifov2014_Embryonic
11168	Iossifov2014:0004	Iossifov2014_Embryonic
11169	Iossifov2014:0004	Iossifov2014_Embryonic
11173	Iossifov2014:0004	Iossifov2014_Embryonic
11177	Iossifov2014:0004	Iossifov2014_Embryonic
11179	Iossifov2014:0004	Iossifov2014_Embryonic
11180	Iossifov2014:0004	Iossifov2014_Embryonic
11189	Iossifov2014:0004	Iossifov2014_Embryonic
11198	Iossifov2014:0004	Iossifov2014_Embryonic
11214	Iossifov2014:0004	Iossifov2014_Embryonic
11258	Iossifov2014:0004	Iossifov2014_Embryonic
11276	Iossifov2014:0004	Iossifov2014_Embryonic
11321	Iossifov2014:0004	Iossifov2014_Embryonic
11329	Iossifov2014:0004	Iossifov2014_Embryonic
11331	Iossifov2014:0004	Iossifov2014_Embryonic
11335	Iossifov2014:0004	Iossifov2014_Embryonic
11338	Iossifov2014:0004	Iossifov2014_Embryonic
11339	Iossifov2014:0004	Iossifov2014_Embryonic
11340	Iossifov2014:0004	Iossifov2014_Embryonic
22803	Iossifov2014:0004	Iossifov2014_Embryonic
22818	Iossifov2014:0004	Iossifov2014_Embryonic
22823	Iossifov2014:0004	Iossifov2014_Embryonic
22828	Iossifov2014:0004	Iossifov2014_Embryonic
22832	Iossifov2014:0004	Iossifov2014_Embryonic
22835	Iossifov2014:0004	Iossifov2014_Embryonic
22846	Iossifov2014:0004	Iossifov2014_Embryonic
22850	Iossifov2014:0004	Iossifov2014_Embryonic
22858	Iossifov2014:0004	Iossifov2014_Embryonic
22869	Iossifov2014:0004	Iossifov2014_Embryonic
22872	Iossifov2014:0004	Iossifov2014_Embryonic
22876	Iossifov2014:0004	Iossifov2014_Embryonic
22877	Iossifov2014:0004	Iossifov2014_Embryonic
22880	Iossifov2014:0004	Iossifov2014_Embryonic
22894	Iossifov2014:0004	Iossifov2014_Embryonic
22902	Iossifov2014:0004	Iossifov2014_Embryonic
22911	Iossifov2014:0004	Iossifov2014_Embryonic
22913	Iossifov2014:0004	Iossifov2014_Embryonic
22916	Iossifov2014:0004	Iossifov2014_Embryonic
22919	Iossifov2014:0004	Iossifov2014_Embryonic
22934	Iossifov2014:0004	Iossifov2014_Embryonic
22954	Iossifov2014:0004	Iossifov2014_Embryonic
22974	Iossifov2014:0004	Iossifov2014_Embryonic
22976	Iossifov2014:0004	Iossifov2014_Embryonic
22982	Iossifov2014:0004	Iossifov2014_Embryonic
22984	Iossifov2014:0004	Iossifov2014_Embryonic
22990	Iossifov2014:0004	Iossifov2014_Embryonic
23002	Iossifov2014:0004	Iossifov2014_Embryonic
23013	Iossifov2014:0004	Iossifov2014_Embryonic
23014	Iossifov2014:0004	Iossifov2014_Embryonic
23019	Iossifov2014:0004	Iossifov2014_Embryonic
23020	Iossifov2014:0004	Iossifov2014_Embryonic
23028	Iossifov2014:0004	Iossifov2014_Embryonic
23030	Iossifov2014:0004	Iossifov2014_Embryonic
23046	Iossifov2014:0004	Iossifov2014_Embryonic
23049	Iossifov2014:0004	Iossifov2014_Embryonic
23054	Iossifov2014:0004	Iossifov2014_Embryonic
23063	Iossifov2014:0004	Iossifov2014_Embryonic
23076	Iossifov2014:0004	Iossifov2014_Embryonic
23082	Iossifov2014:0004	Iossifov2014_Embryonic
23085	Iossifov2014:0004	Iossifov2014_Embryonic
23091	Iossifov2014:0004	Iossifov2014_Embryonic
23097	Iossifov2014:0004	Iossifov2014_Embryonic
23098	Iossifov2014:0004	Iossifov2014_Embryonic
23126	Iossifov2014:0004	Iossifov2014_Embryonic
23132	Iossifov2014:0004	Iossifov2014_Embryonic
23137	Iossifov2014:0004	Iossifov2014_Embryonic
23139	Iossifov2014:0004	Iossifov2014_Embryonic
23143	Iossifov2014:0004	Iossifov2014_Embryonic
23168	Iossifov2014:0004	Iossifov2014_Embryonic
23170	Iossifov2014:0004	Iossifov2014_Embryonic
23173	Iossifov2014:0004	Iossifov2014_Embryonic
23174	Iossifov2014:0004	Iossifov2014_Embryonic
23186	Iossifov2014:0004	Iossifov2014_Embryonic
23200	Iossifov2014:0004	Iossifov2014_Embryonic
23224	Iossifov2014:0004	Iossifov2014_Embryonic
23231	Iossifov2014:0004	Iossifov2014_Embryonic
23234	Iossifov2014:0004	Iossifov2014_Embryonic
23240	Iossifov2014:0004	Iossifov2014_Embryonic
23244	Iossifov2014:0004	Iossifov2014_Embryonic
23248	Iossifov2014:0004	Iossifov2014_Embryonic
23262	Iossifov2014:0004	Iossifov2014_Embryonic
23271	Iossifov2014:0004	Iossifov2014_Embryonic
23272	Iossifov2014:0004	Iossifov2014_Embryonic
23279	Iossifov2014:0004	Iossifov2014_Embryonic
23283	Iossifov2014:0004	Iossifov2014_Embryonic
23301	Iossifov2014:0004	Iossifov2014_Embryonic
23310	Iossifov2014:0004	Iossifov2014_Embryonic
23318	Iossifov2014:0004	Iossifov2014_Embryonic
23321	Iossifov2014:0004	Iossifov2014_Embryonic
23327	Iossifov2014:0004	Iossifov2014_Embryonic
23331	Iossifov2014:0004	Iossifov2014_Embryonic
23332	Iossifov2014:0004	Iossifov2014_Embryonic
23339	Iossifov2014:0004	Iossifov2014_Embryonic
23347	Iossifov2014:0004	Iossifov2014_Embryonic
23358	Iossifov2014:0004	Iossifov2014_Embryonic
23369	Iossifov2014:0004	Iossifov2014_Embryonic
23384	Iossifov2014:0004	Iossifov2014_Embryonic
23389	Iossifov2014:0004	Iossifov2014_Embryonic
23394	Iossifov2014:0004	Iossifov2014_Embryonic
23397	Iossifov2014:0004	Iossifov2014_Embryonic
23403	Iossifov2014:0004	Iossifov2014_Embryonic
23405	Iossifov2014:0004	Iossifov2014_Embryonic
23406	Iossifov2014:0004	Iossifov2014_Embryonic
23411	Iossifov2014:0004	Iossifov2014_Embryonic
23432	Iossifov2014:0004	Iossifov2014_Embryonic
23443	Iossifov2014:0004	Iossifov2014_Embryonic
23450	Iossifov2014:0004	Iossifov2014_Embryonic
23451	Iossifov2014:0004	Iossifov2014_Embryonic
23468	Iossifov2014:0004	Iossifov2014_Embryonic
23469	Iossifov2014:0004	Iossifov2014_Embryonic
23473	Iossifov2014:0004	Iossifov2014_Embryonic
23503	Iossifov2014:0004	Iossifov2014_Embryonic
23512	Iossifov2014:0004	Iossifov2014_Embryonic
23517	Iossifov2014:0004	Iossifov2014_Embryonic
23522	Iossifov2014:0004	Iossifov2014_Embryonic
23524	Iossifov2014:0004	Iossifov2014_Embryonic
23528	Iossifov2014:0004	Iossifov2014_Embryonic
23534	Iossifov2014:0004	Iossifov2014_Embryonic
23543	Iossifov2014:0004	Iossifov2014_Embryonic
23589	Iossifov2014:0004	Iossifov2014_Embryonic
23592	Iossifov2014:0004	Iossifov2014_Embryonic
23598	Iossifov2014:0004	Iossifov2014_Embryonic
23603	Iossifov2014:0004	Iossifov2014_Embryonic
23608	Iossifov2014:0004	Iossifov2014_Embryonic
23613	Iossifov2014:0004	Iossifov2014_Embryonic
23623	Iossifov2014:0004	Iossifov2014_Embryonic
23625	Iossifov2014:0004	Iossifov2014_Embryonic
23633	Iossifov2014:0004	Iossifov2014_Embryonic
23635	Iossifov2014:0004	Iossifov2014_Embryonic
23636	Iossifov2014:0004	Iossifov2014_Embryonic
23649	Iossifov2014:0004	Iossifov2014_Embryonic
23658	Iossifov2014:0004	Iossifov2014_Embryonic
23660	Iossifov2014:0004	Iossifov2014_Embryonic
23683	Iossifov2014:0004	Iossifov2014_Embryonic
23774	Iossifov2014:0004	Iossifov2014_Embryonic
24138	Iossifov2014:0004	Iossifov2014_Embryonic
24145	Iossifov2014:0004	Iossifov2014_Embryonic
24148	Iossifov2014:0004	Iossifov2014_Embryonic
25776	Iossifov2014:0004	Iossifov2014_Embryonic
25800	Iossifov2014:0004	Iossifov2014_Embryonic
25813	Iossifov2014:0004	Iossifov2014_Embryonic
25820	Iossifov2014:0004	Iossifov2014_Embryonic
25836	Iossifov2014:0004	Iossifov2014_Embryonic
25842	Iossifov2014:0004	Iossifov2014_Embryonic
25843	Iossifov2014:0004	Iossifov2014_Embryonic
25850	Iossifov2014:0004	Iossifov2014_Embryonic
25853	Iossifov2014:0004	Iossifov2014_Embryonic
25862	Iossifov2014:0004	Iossifov2014_Embryonic
25886	Iossifov2014:0004	Iossifov2014_Embryonic
25888	Iossifov2014:0004	Iossifov2014_Embryonic
25896	Iossifov2014:0004	Iossifov2014_Embryonic
25904	Iossifov2014:0004	Iossifov2014_Embryonic
25917	Iossifov2014:0004	Iossifov2014_Embryonic
25929	Iossifov2014:0004	Iossifov2014_Embryonic
25941	Iossifov2014:0004	Iossifov2014_Embryonic
25942	Iossifov2014:0004	Iossifov2014_Embryonic
25962	Iossifov2014:0004	Iossifov2014_Embryonic
25977	Iossifov2014:0004	Iossifov2014_Embryonic
25980	Iossifov2014:0004	Iossifov2014_Embryonic
25987	Iossifov2014:0004	Iossifov2014_Embryonic
26003	Iossifov2014:0004	Iossifov2014_Embryonic
26005	Iossifov2014:0004	Iossifov2014_Embryonic
26009	Iossifov2014:0004	Iossifov2014_Embryonic
26039	Iossifov2014:0004	Iossifov2014_Embryonic
26040	Iossifov2014:0004	Iossifov2014_Embryonic
26043	Iossifov2014:0004	Iossifov2014_Embryonic
26053	Iossifov2014:0004	Iossifov2014_Embryonic
26058	Iossifov2014:0004	Iossifov2014_Embryonic
26064	Iossifov2014:0004	Iossifov2014_Embryonic
26098	Iossifov2014:0004	Iossifov2014_Embryonic
26108	Iossifov2014:0004	Iossifov2014_Embryonic
26122	Iossifov2014:0004	Iossifov2014_Embryonic
26135	Iossifov2014:0004	Iossifov2014_Embryonic
26148	Iossifov2014:0004	Iossifov2014_Embryonic
26153	Iossifov2014:0004	Iossifov2014_Embryonic
26156	Iossifov2014:0004	Iossifov2014_Embryonic
26230	Iossifov2014:0004	Iossifov2014_Embryonic
26258	Iossifov2014:0004	Iossifov2014_Embryonic
26259	Iossifov2014:0004	Iossifov2014_Embryonic
26260	Iossifov2014:0004	Iossifov2014_Embryonic
26271	Iossifov2014:0004	Iossifov2014_Embryonic
26277	Iossifov2014:0004	Iossifov2014_Embryonic
26284	Iossifov2014:0004	Iossifov2014_Embryonic
26286	Iossifov2014:0004	Iossifov2014_Embryonic
26502	Iossifov2014:0004	Iossifov2014_Embryonic
26575	Iossifov2014:0004	Iossifov2014_Embryonic
26586	Iossifov2014:0004	Iossifov2014_Embryonic
26960	Iossifov2014:0004	Iossifov2014_Embryonic
26985	Iossifov2014:0004	Iossifov2014_Embryonic
27005	Iossifov2014:0004	Iossifov2014_Embryonic
27042	Iossifov2014:0004	Iossifov2014_Embryonic
27092	Iossifov2014:0004	Iossifov2014_Embryonic
27097	Iossifov2014:0004	Iossifov2014_Embryonic
27125	Iossifov2014:0004	Iossifov2014_Embryonic
27241	Iossifov2014:0004	Iossifov2014_Embryonic
27340	Iossifov2014:0004	Iossifov2014_Embryonic
27346	Iossifov2014:0004	Iossifov2014_Embryonic
27436	Iossifov2014:0004	Iossifov2014_Embryonic
28511	Iossifov2014:0004	Iossifov2014_Embryonic
28514	Iossifov2014:0004	Iossifov2014_Embryonic
28969	Iossifov2014:0004	Iossifov2014_Embryonic
28981	Iossifov2014:0004	Iossifov2014_Embryonic
28982	Iossifov2014:0004	Iossifov2014_Embryonic
29028	Iossifov2014:0004	Iossifov2014_Embryonic
29072	Iossifov2014:0004	Iossifov2014_Embryonic
29094	Iossifov2014:0004	Iossifov2014_Embryonic
29102	Iossifov2014:0004	Iossifov2014_Embryonic
29105	Iossifov2014:0004	Iossifov2014_Embryonic
29127	Iossifov2014:0004	Iossifov2014_Embryonic
29128	Iossifov2014:0004	Iossifov2014_Embryonic
29766	Iossifov2014:0004	Iossifov2014_Embryonic
29843	Iossifov2014:0004	Iossifov2014_Embryonic
29883	Iossifov2014:0004	Iossifov2014_Embryonic
29889	Iossifov2014:0004	Iossifov2014_Embryonic
29890	Iossifov2014:0004	Iossifov2014_Embryonic
29923	Iossifov2014:0004	Iossifov2014_Embryonic
29957	Iossifov2014:0004	Iossifov2014_Embryonic
29966	Iossifov2014:0004	Iossifov2014_Embryonic
29967	Iossifov2014:0004	Iossifov2014_Embryonic
29980	Iossifov2014:0004	Iossifov2014_Embryonic
29997	Iossifov2014:0004	Iossifov2014_Embryonic
30832	Iossifov2014:0004	Iossifov2014_Embryonic
49855	Iossifov2014:0004	Iossifov2014_Embryonic
50512	Iossifov2014:0004	Iossifov2014_Embryonic
50804	Iossifov2014:0004	Iossifov2014_Embryonic
50809	Iossifov2014:0004	Iossifov2014_Embryonic
50937	Iossifov2014:0004	Iossifov2014_Embryonic
51021	Iossifov2014:0004	Iossifov2014_Embryonic
51029	Iossifov2014:0004	Iossifov2014_Embryonic
51035	Iossifov2014:0004	Iossifov2014_Embryonic
51098	Iossifov2014:0004	Iossifov2014_Embryonic
51107	Iossifov2014:0004	Iossifov2014_Embryonic
51111	Iossifov2014:0004	Iossifov2014_Embryonic
51122	Iossifov2014:0004	Iossifov2014_Embryonic
51143	Iossifov2014:0004	Iossifov2014_Embryonic
51155	Iossifov2014:0004	Iossifov2014_Embryonic
51163	Iossifov2014:0004	Iossifov2014_Embryonic
51193	Iossifov2014:0004	Iossifov2014_Embryonic
51203	Iossifov2014:0004	Iossifov2014_Embryonic
51230	Iossifov2014:0004	Iossifov2014_Embryonic
51283	Iossifov2014:0004	Iossifov2014_Embryonic
51291	Iossifov2014:0004	Iossifov2014_Embryonic
51304	Iossifov2014:0004	Iossifov2014_Embryonic
51320	Iossifov2014:0004	Iossifov2014_Embryonic
51339	Iossifov2014:0004	Iossifov2014_Embryonic
51340	Iossifov2014:0004	Iossifov2014_Embryonic
51366	Iossifov2014:0004	Iossifov2014_Embryonic
51386	Iossifov2014:0004	Iossifov2014_Embryonic
51399	Iossifov2014:0004	Iossifov2014_Embryonic
51400	Iossifov2014:0004	Iossifov2014_Embryonic
51430	Iossifov2014:0004	Iossifov2014_Embryonic
51441	Iossifov2014:0004	Iossifov2014_Embryonic
51447	Iossifov2014:0004	Iossifov2014_Embryonic
51455	Iossifov2014:0004	Iossifov2014_Embryonic
51465	Iossifov2014:0004	Iossifov2014_Embryonic
51477	Iossifov2014:0004	Iossifov2014_Embryonic
51496	Iossifov2014:0004	Iossifov2014_Embryonic
51512	Iossifov2014:0004	Iossifov2014_Embryonic
51514	Iossifov2014:0004	Iossifov2014_Embryonic
51534	Iossifov2014:0004	Iossifov2014_Embryonic
51545	Iossifov2014:0004	Iossifov2014_Embryonic
51552	Iossifov2014:0004	Iossifov2014_Embryonic
51582	Iossifov2014:0004	Iossifov2014_Embryonic
51585	Iossifov2014:0004	Iossifov2014_Embryonic
51592	Iossifov2014:0004	Iossifov2014_Embryonic
51602	Iossifov2014:0004	Iossifov2014_Embryonic
51614	Iossifov2014:0004	Iossifov2014_Embryonic
51659	Iossifov2014:0004	Iossifov2014_Embryonic
51661	Iossifov2014:0004	Iossifov2014_Embryonic
51684	Iossifov2014:0004	Iossifov2014_Embryonic
51692	Iossifov2014:0004	Iossifov2014_Embryonic
51742	Iossifov2014:0004	Iossifov2014_Embryonic
51755	Iossifov2014:0004	Iossifov2014_Embryonic
51762	Iossifov2014:0004	Iossifov2014_Embryonic
51773	Iossifov2014:0004	Iossifov2014_Embryonic
51780	Iossifov2014:0004	Iossifov2014_Embryonic
53335	Iossifov2014:0004	Iossifov2014_Embryonic
53371	Iossifov2014:0004	Iossifov2014_Embryonic
53635	Iossifov2014:0004	Iossifov2014_Embryonic
53904	Iossifov2014:0004	Iossifov2014_Embryonic
53944	Iossifov2014:0004	Iossifov2014_Embryonic
54020	Iossifov2014:0004	Iossifov2014_Embryonic
54329	Iossifov2014:0004	Iossifov2014_Embryonic
54331	Iossifov2014:0004	Iossifov2014_Embryonic
54442	Iossifov2014:0004	Iossifov2014_Embryonic
54455	Iossifov2014:0004	Iossifov2014_Embryonic
54464	Iossifov2014:0004	Iossifov2014_Embryonic
54468	Iossifov2014:0004	Iossifov2014_Embryonic
54471	Iossifov2014:0004	Iossifov2014_Embryonic
54475	Iossifov2014:0004	Iossifov2014_Embryonic
54487	Iossifov2014:0004	Iossifov2014_Embryonic
54503	Iossifov2014:0004	Iossifov2014_Embryonic
54505	Iossifov2014:0004	Iossifov2014_Embryonic
54542	Iossifov2014:0004	Iossifov2014_Embryonic
54554	Iossifov2014:0004	Iossifov2014_Embryonic
54555	Iossifov2014:0004	Iossifov2014_Embryonic
54619	Iossifov2014:0004	Iossifov2014_Embryonic
54663	Iossifov2014:0004	Iossifov2014_Embryonic
54665	Iossifov2014:0004	Iossifov2014_Embryonic
54676	Iossifov2014:0004	Iossifov2014_Embryonic
54733	Iossifov2014:0004	Iossifov2014_Embryonic
54756	Iossifov2014:0004	Iossifov2014_Embryonic
54778	Iossifov2014:0004	Iossifov2014_Embryonic
54799	Iossifov2014:0004	Iossifov2014_Embryonic
54801	Iossifov2014:0004	Iossifov2014_Embryonic
54808	Iossifov2014:0004	Iossifov2014_Embryonic
54813	Iossifov2014:0004	Iossifov2014_Embryonic
54823	Iossifov2014:0004	Iossifov2014_Embryonic
54839	Iossifov2014:0004	Iossifov2014_Embryonic
54856	Iossifov2014:0004	Iossifov2014_Embryonic
54870	Iossifov2014:0004	Iossifov2014_Embryonic
54874	Iossifov2014:0004	Iossifov2014_Embryonic
54875	Iossifov2014:0004	Iossifov2014_Embryonic
54881	Iossifov2014:0004	Iossifov2014_Embryonic
54891	Iossifov2014:0004	Iossifov2014_Embryonic
54892	Iossifov2014:0004	Iossifov2014_Embryonic
54901	Iossifov2014:0004	Iossifov2014_Embryonic
54904	Iossifov2014:0004	Iossifov2014_Embryonic
54908	Iossifov2014:0004	Iossifov2014_Embryonic
54910	Iossifov2014:0004	Iossifov2014_Embryonic
54934	Iossifov2014:0004	Iossifov2014_Embryonic
54956	Iossifov2014:0004	Iossifov2014_Embryonic
54963	Iossifov2014:0004	Iossifov2014_Embryonic
54974	Iossifov2014:0004	Iossifov2014_Embryonic
54993	Iossifov2014:0004	Iossifov2014_Embryonic
55003	Iossifov2014:0004	Iossifov2014_Embryonic
55010	Iossifov2014:0004	Iossifov2014_Embryonic
55023	Iossifov2014:0004	Iossifov2014_Embryonic
55031	Iossifov2014:0004	Iossifov2014_Embryonic
55038	Iossifov2014:0004	Iossifov2014_Embryonic
55055	Iossifov2014:0004	Iossifov2014_Embryonic
55070	Iossifov2014:0004	Iossifov2014_Embryonic
55094	Iossifov2014:0004	Iossifov2014_Embryonic
55103	Iossifov2014:0004	Iossifov2014_Embryonic
55116	Iossifov2014:0004	Iossifov2014_Embryonic
55127	Iossifov2014:0004	Iossifov2014_Embryonic
55133	Iossifov2014:0004	Iossifov2014_Embryonic
55135	Iossifov2014:0004	Iossifov2014_Embryonic
55143	Iossifov2014:0004	Iossifov2014_Embryonic
55149	Iossifov2014:0004	Iossifov2014_Embryonic
55159	Iossifov2014:0004	Iossifov2014_Embryonic
55165	Iossifov2014:0004	Iossifov2014_Embryonic
55167	Iossifov2014:0004	Iossifov2014_Embryonic
55172	Iossifov2014:0004	Iossifov2014_Embryonic
55180	Iossifov2014:0004	Iossifov2014_Embryonic
55183	Iossifov2014:0004	Iossifov2014_Embryonic
55193	Iossifov2014:0004	Iossifov2014_Embryonic
55205	Iossifov2014:0004	Iossifov2014_Embryonic
55209	Iossifov2014:0004	Iossifov2014_Embryonic
55215	Iossifov2014:0004	Iossifov2014_Embryonic
55216	Iossifov2014:0004	Iossifov2014_Embryonic
55226	Iossifov2014:0004	Iossifov2014_Embryonic
55236	Iossifov2014:0004	Iossifov2014_Embryonic
55239	Iossifov2014:0004	Iossifov2014_Embryonic
55243	Iossifov2014:0004	Iossifov2014_Embryonic
55247	Iossifov2014:0004	Iossifov2014_Embryonic
55251	Iossifov2014:0004	Iossifov2014_Embryonic
55257	Iossifov2014:0004	Iossifov2014_Embryonic
55269	Iossifov2014:0004	Iossifov2014_Embryonic
55284	Iossifov2014:0004	Iossifov2014_Embryonic
55291	Iossifov2014:0004	Iossifov2014_Embryonic
55320	Iossifov2014:0004	Iossifov2014_Embryonic
55326	Iossifov2014:0004	Iossifov2014_Embryonic
55327	Iossifov2014:0004	Iossifov2014_Embryonic
55341	Iossifov2014:0004	Iossifov2014_Embryonic
55342	Iossifov2014:0004	Iossifov2014_Embryonic
55345	Iossifov2014:0004	Iossifov2014_Embryonic
55355	Iossifov2014:0004	Iossifov2014_Embryonic
55388	Iossifov2014:0004	Iossifov2014_Embryonic
55435	Iossifov2014:0004	Iossifov2014_Embryonic
55500	Iossifov2014:0004	Iossifov2014_Embryonic
55506	Iossifov2014:0004	Iossifov2014_Embryonic
55521	Iossifov2014:0004	Iossifov2014_Embryonic
55526	Iossifov2014:0004	Iossifov2014_Embryonic
55534	Iossifov2014:0004	Iossifov2014_Embryonic
55565	Iossifov2014:0004	Iossifov2014_Embryonic
55577	Iossifov2014:0004	Iossifov2014_Embryonic
55596	Iossifov2014:0004	Iossifov2014_Embryonic
55602	Iossifov2014:0004	Iossifov2014_Embryonic
55622	Iossifov2014:0004	Iossifov2014_Embryonic
55631	Iossifov2014:0004	Iossifov2014_Embryonic
55632	Iossifov2014:0004	Iossifov2014_Embryonic
55635	Iossifov2014:0004	Iossifov2014_Embryonic
55659	Iossifov2014:0004	Iossifov2014_Embryonic
55660	Iossifov2014:0004	Iossifov2014_Embryonic
55667	Iossifov2014:0004	Iossifov2014_Embryonic
55668	Iossifov2014:0004	Iossifov2014_Embryonic
55671	Iossifov2014:0004	Iossifov2014_Embryonic
55681	Iossifov2014:0004	Iossifov2014_Embryonic
55689	Iossifov2014:0004	Iossifov2014_Embryonic
55690	Iossifov2014:0004	Iossifov2014_Embryonic
55705	Iossifov2014:0004	Iossifov2014_Embryonic
55715	Iossifov2014:0004	Iossifov2014_Embryonic
55716	Iossifov2014:0004	Iossifov2014_Embryonic
55720	Iossifov2014:0004	Iossifov2014_Embryonic
55723	Iossifov2014:0004	Iossifov2014_Embryonic
55727	Iossifov2014:0004	Iossifov2014_Embryonic
55728	Iossifov2014:0004	Iossifov2014_Embryonic
55729	Iossifov2014:0004	Iossifov2014_Embryonic
55740	Iossifov2014:0004	Iossifov2014_Embryonic
55746	Iossifov2014:0004	Iossifov2014_Embryonic
55751	Iossifov2014:0004	Iossifov2014_Embryonic
55756	Iossifov2014:0004	Iossifov2014_Embryonic
55758	Iossifov2014:0004	Iossifov2014_Embryonic
55770	Iossifov2014:0004	Iossifov2014_Embryonic
55771	Iossifov2014:0004	Iossifov2014_Embryonic
55775	Iossifov2014:0004	Iossifov2014_Embryonic
55776	Iossifov2014:0004	Iossifov2014_Embryonic
55777	Iossifov2014:0004	Iossifov2014_Embryonic
55781	Iossifov2014:0004	Iossifov2014_Embryonic
55789	Iossifov2014:0004	Iossifov2014_Embryonic
55802	Iossifov2014:0004	Iossifov2014_Embryonic
55832	Iossifov2014:0004	Iossifov2014_Embryonic
55833	Iossifov2014:0004	Iossifov2014_Embryonic
55872	Iossifov2014:0004	Iossifov2014_Embryonic
55892	Iossifov2014:0004	Iossifov2014_Embryonic
55917	Iossifov2014:0004	Iossifov2014_Embryonic
55958	Iossifov2014:0004	Iossifov2014_Embryonic
56034	Iossifov2014:0004	Iossifov2014_Embryonic
56121	Iossifov2014:0004	Iossifov2014_Embryonic
56122	Iossifov2014:0004	Iossifov2014_Embryonic
56123	Iossifov2014:0004	Iossifov2014_Embryonic
56125	Iossifov2014:0004	Iossifov2014_Embryonic
56126	Iossifov2014:0004	Iossifov2014_Embryonic
56127	Iossifov2014:0004	Iossifov2014_Embryonic
56128	Iossifov2014:0004	Iossifov2014_Embryonic
56129	Iossifov2014:0004	Iossifov2014_Embryonic
56132	Iossifov2014:0004	Iossifov2014_Embryonic
56133	Iossifov2014:0004	Iossifov2014_Embryonic
56242	Iossifov2014:0004	Iossifov2014_Embryonic
56252	Iossifov2014:0004	Iossifov2014_Embryonic
56886	Iossifov2014:0004	Iossifov2014_Embryonic
56896	Iossifov2014:0004	Iossifov2014_Embryonic
56916	Iossifov2014:0004	Iossifov2014_Embryonic
56949	Iossifov2014:0004	Iossifov2014_Embryonic
56965	Iossifov2014:0004	Iossifov2014_Embryonic
56980	Iossifov2014:0004	Iossifov2014_Embryonic
56992	Iossifov2014:0004	Iossifov2014_Embryonic
57002	Iossifov2014:0004	Iossifov2014_Embryonic
57037	Iossifov2014:0004	Iossifov2014_Embryonic
57038	Iossifov2014:0004	Iossifov2014_Embryonic
57082	Iossifov2014:0004	Iossifov2014_Embryonic
57116	Iossifov2014:0004	Iossifov2014_Embryonic
57117	Iossifov2014:0004	Iossifov2014_Embryonic
57120	Iossifov2014:0004	Iossifov2014_Embryonic
57122	Iossifov2014:0004	Iossifov2014_Embryonic
57144	Iossifov2014:0004	Iossifov2014_Embryonic
57147	Iossifov2014:0004	Iossifov2014_Embryonic
57157	Iossifov2014:0004	Iossifov2014_Embryonic
57161	Iossifov2014:0004	Iossifov2014_Embryonic
57162	Iossifov2014:0004	Iossifov2014_Embryonic
57178	Iossifov2014:0004	Iossifov2014_Embryonic
57179	Iossifov2014:0004	Iossifov2014_Embryonic
57182	Iossifov2014:0004	Iossifov2014_Embryonic
57186	Iossifov2014:0004	Iossifov2014_Embryonic
57215	Iossifov2014:0004	Iossifov2014_Embryonic
57223	Iossifov2014:0004	Iossifov2014_Embryonic
57336	Iossifov2014:0004	Iossifov2014_Embryonic
57337	Iossifov2014:0004	Iossifov2014_Embryonic
57343	Iossifov2014:0004	Iossifov2014_Embryonic
57405	Iossifov2014:0004	Iossifov2014_Embryonic
57415	Iossifov2014:0004	Iossifov2014_Embryonic
57448	Iossifov2014:0004	Iossifov2014_Embryonic
57459	Iossifov2014:0004	Iossifov2014_Embryonic
57466	Iossifov2014:0004	Iossifov2014_Embryonic
57472	Iossifov2014:0004	Iossifov2014_Embryonic
57486	Iossifov2014:0004	Iossifov2014_Embryonic
57510	Iossifov2014:0004	Iossifov2014_Embryonic
57522	Iossifov2014:0004	Iossifov2014_Embryonic
57523	Iossifov2014:0004	Iossifov2014_Embryonic
57541	Iossifov2014:0004	Iossifov2014_Embryonic
57547	Iossifov2014:0004	Iossifov2014_Embryonic
57549	Iossifov2014:0004	Iossifov2014_Embryonic
57561	Iossifov2014:0004	Iossifov2014_Embryonic
57563	Iossifov2014:0004	Iossifov2014_Embryonic
57585	Iossifov2014:0004	Iossifov2014_Embryonic
57587	Iossifov2014:0004	Iossifov2014_Embryonic
57606	Iossifov2014:0004	Iossifov2014_Embryonic
57611	Iossifov2014:0004	Iossifov2014_Embryonic
57621	Iossifov2014:0004	Iossifov2014_Embryonic
57626	Iossifov2014:0004	Iossifov2014_Embryonic
57634	Iossifov2014:0004	Iossifov2014_Embryonic
57645	Iossifov2014:0004	Iossifov2014_Embryonic
57649	Iossifov2014:0004	Iossifov2014_Embryonic
57650	Iossifov2014:0004	Iossifov2014_Embryonic
57655	Iossifov2014:0004	Iossifov2014_Embryonic
57657	Iossifov2014:0004	Iossifov2014_Embryonic
57670	Iossifov2014:0004	Iossifov2014_Embryonic
57684	Iossifov2014:0004	Iossifov2014_Embryonic
57690	Iossifov2014:0004	Iossifov2014_Embryonic
57691	Iossifov2014:0004	Iossifov2014_Embryonic
57693	Iossifov2014:0004	Iossifov2014_Embryonic
57695	Iossifov2014:0004	Iossifov2014_Embryonic
57715	Iossifov2014:0004	Iossifov2014_Embryonic
57717	Iossifov2014:0004	Iossifov2014_Embryonic
57721	Iossifov2014:0004	Iossifov2014_Embryonic
57727	Iossifov2014:0004	Iossifov2014_Embryonic
57862	Iossifov2014:0004	Iossifov2014_Embryonic
58155	Iossifov2014:0004	Iossifov2014_Embryonic
58158	Iossifov2014:0004	Iossifov2014_Embryonic
58486	Iossifov2014:0004	Iossifov2014_Embryonic
58491	Iossifov2014:0004	Iossifov2014_Embryonic
58497	Iossifov2014:0004	Iossifov2014_Embryonic
58499	Iossifov2014:0004	Iossifov2014_Embryonic
58500	Iossifov2014:0004	Iossifov2014_Embryonic
58516	Iossifov2014:0004	Iossifov2014_Embryonic
60436	Iossifov2014:0004	Iossifov2014_Embryonic
60468	Iossifov2014:0004	Iossifov2014_Embryonic
60496	Iossifov2014:0004	Iossifov2014_Embryonic
60509	Iossifov2014:0004	Iossifov2014_Embryonic
60560	Iossifov2014:0004	Iossifov2014_Embryonic
60682	Iossifov2014:0004	Iossifov2014_Embryonic
60684	Iossifov2014:0004	Iossifov2014_Embryonic
63826	Iossifov2014:0004	Iossifov2014_Embryonic
63892	Iossifov2014:0004	Iossifov2014_Embryonic
63894	Iossifov2014:0004	Iossifov2014_Embryonic
63897	Iossifov2014:0004	Iossifov2014_Embryonic
63920	Iossifov2014:0004	Iossifov2014_Embryonic
63935	Iossifov2014:0004	Iossifov2014_Embryonic
63967	Iossifov2014:0004	Iossifov2014_Embryonic
63973	Iossifov2014:0004	Iossifov2014_Embryonic
63979	Iossifov2014:0004	Iossifov2014_Embryonic
64062	Iossifov2014:0004	Iossifov2014_Embryonic
64105	Iossifov2014:0004	Iossifov2014_Embryonic
64151	Iossifov2014:0004	Iossifov2014_Embryonic
64282	Iossifov2014:0004	Iossifov2014_Embryonic
64318	Iossifov2014:0004	Iossifov2014_Embryonic
64324	Iossifov2014:0004	Iossifov2014_Embryonic
64343	Iossifov2014:0004	Iossifov2014_Embryonic
64359	Iossifov2014:0004	Iossifov2014_Embryonic
64375	Iossifov2014:0004	Iossifov2014_Embryonic
64410	Iossifov2014:0004	Iossifov2014_Embryonic
64425	Iossifov2014:0004	Iossifov2014_Embryonic
64430	Iossifov2014:0004	Iossifov2014_Embryonic
64598	Iossifov2014:0004	Iossifov2014_Embryonic
64746	Iossifov2014:0004	Iossifov2014_Embryonic
64750	Iossifov2014:0004	Iossifov2014_Embryonic
64763	Iossifov2014:0004	Iossifov2014_Embryonic
64857	Iossifov2014:0004	Iossifov2014_Embryonic
64858	Iossifov2014:0004	Iossifov2014_Embryonic
64864	Iossifov2014:0004	Iossifov2014_Embryonic
64895	Iossifov2014:0004	Iossifov2014_Embryonic
64919	Iossifov2014:0004	Iossifov2014_Embryonic
64925	Iossifov2014:0004	Iossifov2014_Embryonic
64943	Iossifov2014:0004	Iossifov2014_Embryonic
65055	Iossifov2014:0004	Iossifov2014_Embryonic
65080	Iossifov2014:0004	Iossifov2014_Embryonic
65108	Iossifov2014:0004	Iossifov2014_Embryonic
65243	Iossifov2014:0004	Iossifov2014_Embryonic
65244	Iossifov2014:0004	Iossifov2014_Embryonic
65251	Iossifov2014:0004	Iossifov2014_Embryonic
65986	Iossifov2014:0004	Iossifov2014_Embryonic
65999	Iossifov2014:0004	Iossifov2014_Embryonic
78997	Iossifov2014:0004	Iossifov2014_Embryonic
79002	Iossifov2014:0004	Iossifov2014_Embryonic
79023	Iossifov2014:0004	Iossifov2014_Embryonic
79048	Iossifov2014:0004	Iossifov2014_Embryonic
79071	Iossifov2014:0004	Iossifov2014_Embryonic
79077	Iossifov2014:0004	Iossifov2014_Embryonic
79139	Iossifov2014:0004	Iossifov2014_Embryonic
79172	Iossifov2014:0004	Iossifov2014_Embryonic
79188	Iossifov2014:0004	Iossifov2014_Embryonic
79570	Iossifov2014:0004	Iossifov2014_Embryonic
79572	Iossifov2014:0004	Iossifov2014_Embryonic
79573	Iossifov2014:0004	Iossifov2014_Embryonic
79595	Iossifov2014:0004	Iossifov2014_Embryonic
79596	Iossifov2014:0004	Iossifov2014_Embryonic
79598	Iossifov2014:0004	Iossifov2014_Embryonic
79631	Iossifov2014:0004	Iossifov2014_Embryonic
79633	Iossifov2014:0004	Iossifov2014_Embryonic
79634	Iossifov2014:0004	Iossifov2014_Embryonic
79646	Iossifov2014:0004	Iossifov2014_Embryonic
79648	Iossifov2014:0004	Iossifov2014_Embryonic
79654	Iossifov2014:0004	Iossifov2014_Embryonic
79664	Iossifov2014:0004	Iossifov2014_Embryonic
79665	Iossifov2014:0004	Iossifov2014_Embryonic
79674	Iossifov2014:0004	Iossifov2014_Embryonic
79677	Iossifov2014:0004	Iossifov2014_Embryonic
79682	Iossifov2014:0004	Iossifov2014_Embryonic
79684	Iossifov2014:0004	Iossifov2014_Embryonic
79697	Iossifov2014:0004	Iossifov2014_Embryonic
79703	Iossifov2014:0004	Iossifov2014_Embryonic
79707	Iossifov2014:0004	Iossifov2014_Embryonic
79723	Iossifov2014:0004	Iossifov2014_Embryonic
79725	Iossifov2014:0004	Iossifov2014_Embryonic
79728	Iossifov2014:0004	Iossifov2014_Embryonic
79731	Iossifov2014:0004	Iossifov2014_Embryonic
79733	Iossifov2014:0004	Iossifov2014_Embryonic
79796	Iossifov2014:0004	Iossifov2014_Embryonic
79801	Iossifov2014:0004	Iossifov2014_Embryonic
79805	Iossifov2014:0004	Iossifov2014_Embryonic
79807	Iossifov2014:0004	Iossifov2014_Embryonic
79813	Iossifov2014:0004	Iossifov2014_Embryonic
79827	Iossifov2014:0004	Iossifov2014_Embryonic
79829	Iossifov2014:0004	Iossifov2014_Embryonic
79830	Iossifov2014:0004	Iossifov2014_Embryonic
79832	Iossifov2014:0004	Iossifov2014_Embryonic
79840	Iossifov2014:0004	Iossifov2014_Embryonic
79845	Iossifov2014:0004	Iossifov2014_Embryonic
79850	Iossifov2014:0004	Iossifov2014_Embryonic
79866	Iossifov2014:0004	Iossifov2014_Embryonic
79869	Iossifov2014:0004	Iossifov2014_Embryonic
79872	Iossifov2014:0004	Iossifov2014_Embryonic
79877	Iossifov2014:0004	Iossifov2014_Embryonic
79892	Iossifov2014:0004	Iossifov2014_Embryonic
79915	Iossifov2014:0004	Iossifov2014_Embryonic
79968	Iossifov2014:0004	Iossifov2014_Embryonic
80010	Iossifov2014:0004	Iossifov2014_Embryonic
80034	Iossifov2014:0004	Iossifov2014_Embryonic
80055	Iossifov2014:0004	Iossifov2014_Embryonic
80071	Iossifov2014:0004	Iossifov2014_Embryonic
80095	Iossifov2014:0004	Iossifov2014_Embryonic
80110	Iossifov2014:0004	Iossifov2014_Embryonic
80153	Iossifov2014:0004	Iossifov2014_Embryonic
80155	Iossifov2014:0004	Iossifov2014_Embryonic
80204	Iossifov2014:0004	Iossifov2014_Embryonic
80205	Iossifov2014:0004	Iossifov2014_Embryonic
80209	Iossifov2014:0004	Iossifov2014_Embryonic
80233	Iossifov2014:0004	Iossifov2014_Embryonic
80267	Iossifov2014:0004	Iossifov2014_Embryonic
80274	Iossifov2014:0004	Iossifov2014_Embryonic
80304	Iossifov2014:0004	Iossifov2014_Embryonic
80312	Iossifov2014:0004	Iossifov2014_Embryonic
80314	Iossifov2014:0004	Iossifov2014_Embryonic
80335	Iossifov2014:0004	Iossifov2014_Embryonic
80339	Iossifov2014:0004	Iossifov2014_Embryonic
80381	Iossifov2014:0004	Iossifov2014_Embryonic
80778	Iossifov2014:0004	Iossifov2014_Embryonic
80818	Iossifov2014:0004	Iossifov2014_Embryonic
81539	Iossifov2014:0004	Iossifov2014_Embryonic
81543	Iossifov2014:0004	Iossifov2014_Embryonic
81562	Iossifov2014:0004	Iossifov2014_Embryonic
81566	Iossifov2014:0004	Iossifov2014_Embryonic
81606	Iossifov2014:0004	Iossifov2014_Embryonic
81610	Iossifov2014:0004	Iossifov2014_Embryonic
81614	Iossifov2014:0004	Iossifov2014_Embryonic
81619	Iossifov2014:0004	Iossifov2014_Embryonic
81624	Iossifov2014:0004	Iossifov2014_Embryonic
81796	Iossifov2014:0004	Iossifov2014_Embryonic
81831	Iossifov2014:0004	Iossifov2014_Embryonic
81846	Iossifov2014:0004	Iossifov2014_Embryonic
81857	Iossifov2014:0004	Iossifov2014_Embryonic
81875	Iossifov2014:0004	Iossifov2014_Embryonic
81930	Iossifov2014:0004	Iossifov2014_Embryonic
81931	Iossifov2014:0004	Iossifov2014_Embryonic
83448	Iossifov2014:0004	Iossifov2014_Embryonic
83461	Iossifov2014:0004	Iossifov2014_Embryonic
83480	Iossifov2014:0004	Iossifov2014_Embryonic
83540	Iossifov2014:0004	Iossifov2014_Embryonic
83541	Iossifov2014:0004	Iossifov2014_Embryonic
83591	Iossifov2014:0004	Iossifov2014_Embryonic
83607	Iossifov2014:0004	Iossifov2014_Embryonic
83693	Iossifov2014:0004	Iossifov2014_Embryonic
83695	Iossifov2014:0004	Iossifov2014_Embryonic
83732	Iossifov2014:0004	Iossifov2014_Embryonic
83759	Iossifov2014:0004	Iossifov2014_Embryonic
83856	Iossifov2014:0004	Iossifov2014_Embryonic
83879	Iossifov2014:0004	Iossifov2014_Embryonic
83903	Iossifov2014:0004	Iossifov2014_Embryonic
83932	Iossifov2014:0004	Iossifov2014_Embryonic
83939	Iossifov2014:0004	Iossifov2014_Embryonic
83985	Iossifov2014:0004	Iossifov2014_Embryonic
83989	Iossifov2014:0004	Iossifov2014_Embryonic
83990	Iossifov2014:0004	Iossifov2014_Embryonic
83992	Iossifov2014:0004	Iossifov2014_Embryonic
84002	Iossifov2014:0004	Iossifov2014_Embryonic
84057	Iossifov2014:0004	Iossifov2014_Embryonic
84078	Iossifov2014:0004	Iossifov2014_Embryonic
84085	Iossifov2014:0004	Iossifov2014_Embryonic
84128	Iossifov2014:0004	Iossifov2014_Embryonic
84142	Iossifov2014:0004	Iossifov2014_Embryonic
84146	Iossifov2014:0004	Iossifov2014_Embryonic
84164	Iossifov2014:0004	Iossifov2014_Embryonic
84172	Iossifov2014:0004	Iossifov2014_Embryonic
84206	Iossifov2014:0004	Iossifov2014_Embryonic
84231	Iossifov2014:0004	Iossifov2014_Embryonic
84247	Iossifov2014:0004	Iossifov2014_Embryonic
84248	Iossifov2014:0004	Iossifov2014_Embryonic
84267	Iossifov2014:0004	Iossifov2014_Embryonic
84268	Iossifov2014:0004	Iossifov2014_Embryonic
84271	Iossifov2014:0004	Iossifov2014_Embryonic
84273	Iossifov2014:0004	Iossifov2014_Embryonic
84311	Iossifov2014:0004	Iossifov2014_Embryonic
84316	Iossifov2014:0004	Iossifov2014_Embryonic
84328	Iossifov2014:0004	Iossifov2014_Embryonic
84450	Iossifov2014:0004	Iossifov2014_Embryonic
84456	Iossifov2014:0004	Iossifov2014_Embryonic
84458	Iossifov2014:0004	Iossifov2014_Embryonic
84467	Iossifov2014:0004	Iossifov2014_Embryonic
84513	Iossifov2014:0004	Iossifov2014_Embryonic
84515	Iossifov2014:0004	Iossifov2014_Embryonic
84516	Iossifov2014:0004	Iossifov2014_Embryonic
84529	Iossifov2014:0004	Iossifov2014_Embryonic
84552	Iossifov2014:0004	Iossifov2014_Embryonic
84553	Iossifov2014:0004	Iossifov2014_Embryonic
84612	Iossifov2014:0004	Iossifov2014_Embryonic
84678	Iossifov2014:0004	Iossifov2014_Embryonic
84775	Iossifov2014:0004	Iossifov2014_Embryonic
84792	Iossifov2014:0004	Iossifov2014_Embryonic
84798	Iossifov2014:0004	Iossifov2014_Embryonic
84823	Iossifov2014:0004	Iossifov2014_Embryonic
84838	Iossifov2014:0004	Iossifov2014_Embryonic
84902	Iossifov2014:0004	Iossifov2014_Embryonic
84920	Iossifov2014:0004	Iossifov2014_Embryonic
84924	Iossifov2014:0004	Iossifov2014_Embryonic
84930	Iossifov2014:0004	Iossifov2014_Embryonic
84932	Iossifov2014:0004	Iossifov2014_Embryonic
84937	Iossifov2014:0004	Iossifov2014_Embryonic
84955	Iossifov2014:0004	Iossifov2014_Embryonic
84962	Iossifov2014:0004	Iossifov2014_Embryonic
85369	Iossifov2014:0004	Iossifov2014_Embryonic
85440	Iossifov2014:0004	Iossifov2014_Embryonic
85444	Iossifov2014:0004	Iossifov2014_Embryonic
85464	Iossifov2014:0004	Iossifov2014_Embryonic
85508	Iossifov2014:0004	Iossifov2014_Embryonic
89796	Iossifov2014:0004	Iossifov2014_Embryonic
89890	Iossifov2014:0004	Iossifov2014_Embryonic
89891	Iossifov2014:0004	Iossifov2014_Embryonic
89970	Iossifov2014:0004	Iossifov2014_Embryonic
90139	Iossifov2014:0004	Iossifov2014_Embryonic
90317	Iossifov2014:0004	Iossifov2014_Embryonic
90324	Iossifov2014:0004	Iossifov2014_Embryonic
90333	Iossifov2014:0004	Iossifov2014_Embryonic
90362	Iossifov2014:0004	Iossifov2014_Embryonic
90379	Iossifov2014:0004	Iossifov2014_Embryonic
90381	Iossifov2014:0004	Iossifov2014_Embryonic
90459	Iossifov2014:0004	Iossifov2014_Embryonic
90525	Iossifov2014:0004	Iossifov2014_Embryonic
90550	Iossifov2014:0004	Iossifov2014_Embryonic
90799	Iossifov2014:0004	Iossifov2014_Embryonic
90957	Iossifov2014:0004	Iossifov2014_Embryonic
91120	Iossifov2014:0004	Iossifov2014_Embryonic
91137	Iossifov2014:0004	Iossifov2014_Embryonic
91272	Iossifov2014:0004	Iossifov2014_Embryonic
91392	Iossifov2014:0004	Iossifov2014_Embryonic
91404	Iossifov2014:0004	Iossifov2014_Embryonic
91408	Iossifov2014:0004	Iossifov2014_Embryonic
91526	Iossifov2014:0004	Iossifov2014_Embryonic
91687	Iossifov2014:0004	Iossifov2014_Embryonic
91782	Iossifov2014:0004	Iossifov2014_Embryonic
91975	Iossifov2014:0004	Iossifov2014_Embryonic
92105	Iossifov2014:0004	Iossifov2014_Embryonic
92181	Iossifov2014:0004	Iossifov2014_Embryonic
92369	Iossifov2014:0004	Iossifov2014_Embryonic
92370	Iossifov2014:0004	Iossifov2014_Embryonic
[truncated: 19,451 more rows]
