# Supplementary material for: Meta-analysis of GWAS of over 16,000 individuals with autism spectrum disorder highlights a novel locus at 10q24.32 and a significant overlap with schizophrenia
Source: Mol Autism. 2017 May 22;8:21. doi: 10.1186/s13229-017-0137-9 (PMC5441062; doi:10.1186/s13229-017-0137-9)
Supplement: Supplementary file 9 — INRICH-format gene-set derived from "PGC Schizophrenia GWAS - PMID:25056061". (XLS 490 KB) [file 13229_2017_137_MOESM9_ESM.xls]

## Sheet: Main Analysis Results
TARGET	T_TARG	N_INT	P	PCORR
Parikshak2013:0012 Parikshak2013_M13	572	65	0.00669933	0.164167
Iossifov2014:0007 Iossifov2014_MendelianDiseaseGenes	193	27	0.0223978	0.414117
LindbladToh2011:0002 LindbladToh2011_2xPARS	164	39	0.0259974	0.472705
LindbladToh2011:0001 LindbladToh2011_2xHARs	184	43	0.0273973	0.496101
DeRubeis2014:0005 DeRubeis2014_TRANSCRIPTION	107	14	0.0755924	0.826635
Iossifov2014:0005 Iossifov2014_EssentialGenes	1401	123	0.080092	0.845231
Iossifov2014:0004 Iossifov2014_Embryonic	1388	118	0.0940906	0.874825
Sugathan2014:0001 Sugathan2014_CHD8BindingPartner	2753	243	0.127687	0.942811
Pinto2014:0005 Pinto2014_FMRP	43	9	0.138286	0.959808
Sugathan2014:0002 Sugathan2014_M1	317	35	0.149485	0.968206
Parikshak2013:0016 Parikshak2013_M17	671	73	0.161184	0.972206
DeRubeis2014:0002 DeRubeis2014_NEURODEGENERATION	19	3	0.194781	0.990802
Sanders2015:0003 Sanders2015_TADA	63	9	0.248075	0.998
Sanders2015:0002 Sanders2015_RISK_GENES	88	12	0.253975	0.998
Darnell2011:0001 Darnell2011_FMRP_TARGETS	727	78	0.264474	0.9982
Iossifov2014:0006 Iossifov2014_FMRPTargets	697	75	0.268273	0.9986
Parikshak2013:0003 Parikshak2013_M03	689	56	0.281172	0.9992
Uddin2014:0001 Uddin2014_BRAIN_CRITICAL	1375	145	0.325367	0.9998
Samocha2014:0001 Samocha2014_CONSTRAINED	793	68	0.331967	0.9998
Sugathan2014:0003 Sugathan2014_M2	388	37	0.340966	0.9998
Iossifov2014:0003 Iossifov2014_DeNovoLGDsInSchizoprenia	86	9	0.39956	1
Parikshak2013:0015 Parikshak2013_M16	384	36	0.40136	1
Pinto2014:0006 Pinto2014_ID	196	18	0.410559	1
Parikshak2013:0002 Parikshak2013_M02	545	43	0.435656	1
Iossifov2014:0002 Iossifov2014_ChromatinModifiers	353	29	0.471553	1
Sugathan2014:0004 Sugathan2014_M3	362	25	0.486851	1
Pinto2014:0004 Pinto2014_DAPPLE	237	26	0.50115	1
DeRubeis2014:0003 DeRubeis2014_SYNAPTIC	70	8	0.558344	1
Pinto2014:0001 Pinto2014_ASD	81	8	0.588641	1
Iossifov2014:0008 Iossifov2014_PSD	1116	95	0.640136	1
Sanders2015:0001 Sanders2015_CNV_REGION	28	3	0.672033	1
Sugathan2014:0005 Sugathan2014_M4	339	28	0.676632	1
Pinto2014:0002 Pinto2014_ASD_HIGHCONF	85	9	0.69683	1
Pinto2014:0007 Pinto2014_MAPK	40	3	0.736326	1
Pinto2014:0008 Pinto2014_NEURONAL	24	3	0.772723	1
DeRubeis2014:0001 DeRubeis2014_ASD_RISK	31	2	1	1
Pinto2014:0003 Pinto2014_CHROMATIN	46	2	1	1
DeRubeis2014:0004 DeRubeis2014_TGFB	18	2	1	1

## Sheet: Interval-Gene-Target Summary
TARGET	INTERVAL	GENE_LOC	GENE_ID	GENE_DESC	P
Parikshak2013:0012 Parikshak2013_M13	int518:chr14:79681303..79767060	chr14:78800073..80354633	9369	NRXN3	0.00669933
Parikshak2013:0012 Parikshak2013_M13	int809:chr12:52268138..52334814	chr12:52330728..52429673	160622	GRASP	0.00669933
Parikshak2013:0012 Parikshak2013_M13	int185,int420:chr1:29186719..29593410	chr1:29499168..29627470	51102	MECR	0.00669933
Parikshak2013:0012 Parikshak2013_M13	int955:chr10:100240052..100240617	chr10:100196833..101065632	60495	HPSE2	0.00669933
Parikshak2013:0012 Parikshak2013_M13	int625,int729:chr8:109067078..109588327	chr8:109385852..109519136	9694	EMC2	0.00669933
Parikshak2013:0012 Parikshak2013_M13	int743:chr8:27475767..27564846	chr8:27434433..27542328	1191	CLU	0.00669933
Parikshak2013:0012 Parikshak2013_M13	int807,int254:chr3:50058610..50412945	chr3:50358536..50453177	51364	ZMYND10	0.00669933
Parikshak2013:0012 Parikshak2013_M13	int912:chr7:4952056..5007993	chr7:4925619..5068844	221938	MMD2	0.00669933
Parikshak2013:0012 Parikshak2013_M13	int531:chr11:63295034..63353603	chr11:63321943..63451941	11145	PLA2G16	0.00669933
Parikshak2013:0012 Parikshak2013_M13	int900,int732:chr1:66983920..67221552	chr1:67148139..67264730	200132	TCTEX1D1	0.00669933
Parikshak2013:0012 Parikshak2013_M13	int785:chr8:38014429..38316849	chr8:37980217..38078600	6770	STAR	0.00669933
Parikshak2013:0012 Parikshak2013_M13	int10,int115:chr9:124971170..124982500	chr9:124852186..124982367	254956	MORN5	0.00669933
Parikshak2013:0012 Parikshak2013_M13	int708:chr12:108320634..108475893	chr12:108453247..108664313	9671	WSCD2	0.00669933
Parikshak2013:0012 Parikshak2013_M13	int654:chr3:172419276..172566275	chr3:172328434..172499008	57552	NCEH1	0.00669933
Parikshak2013:0012 Parikshak2013_M13	int454:chr1:19093325..19100178	chr1:18887499..19095360	5081	PAX7	0.00669933
Parikshak2013:0012 Parikshak2013_M13	int415:chr9:79456175..79467292	chr9:79206291..79591003	158471	PRUNE2	0.00669933
Parikshak2013:0012 Parikshak2013_M13	int322:chr11:114040325..114092582	chr11:113860430..114141397	7704	ZBTB16	0.00669933
Parikshak2013:0012 Parikshak2013_M13	int995:chr6:149813940..150180259	chr6:150119893..150255480	84918	LRP11	0.00669933
Parikshak2013:0012 Parikshak2013_M13	int971,int944:chr4:75760504..75983102	chr4:75788284..75995325	25849	PARM1	0.00669933
Parikshak2013:0012 Parikshak2013_M13	int570,int466:chr3:155585172..156005151	chr3:155768336..156276927	7881	KCNAB1	0.00669933
Parikshak2013:0012 Parikshak2013_M13	int691,int59:chr10:68988231..69896336	chr10:69536426..69667937	56521	DNAJC12	0.00669933
Parikshak2013:0012 Parikshak2013_M13	int690:chr22:38387223..38387224	chr22:38348318..38450539	6663	SOX10	0.00669933
Parikshak2013:0012 Parikshak2013_M13	int292:chr13:114138733..114302622	chr13:114056254..114177839	113622	ADPRHL1	0.00669933
Parikshak2013:0012 Parikshak2013_M13	int406:chr3:121342819..121727963	chr3:121484033..121625373	55840	EAF2	0.00669933
Parikshak2013:0012 Parikshak2013_M13	int753:chr8:38622060..38622060	chr8:38515703..38730546	6867	TACC1	0.00669933
Parikshak2013:0012 Parikshak2013_M13	int436:chr22:20031102..20162758	chr22:19934522..20073449	128989	TANGO2	0.00669933
Parikshak2013:0012 Parikshak2013_M13	int625,int729:chr8:109067078..109588327	chr8:108891543..109165913	340419	RSPO2	0.00669933
Parikshak2013:0012 Parikshak2013_M13	int702:chr15:32995468..33062361	chr15:33037744..33556934	342184	FMN1	0.00669933
Parikshak2013:0012 Parikshak2013_M13	int267:chr10:48391129..48449237	chr10:48285088..48393866	118738	ZNF488	0.00669933
Parikshak2013:0012 Parikshak2013_M13	int979:chr10:26160650..26484154	chr10:26435235..26613491	2572	GAD2	0.00669933
Parikshak2013:0012 Parikshak2013_M13	int51:chr1:77899667..78819970	chr1:77677661..78045654	26289	AK5	0.00669933
Parikshak2013:0012 Parikshak2013_M13	int91,int574:chr11:35561328..35811024	chr11:35433375..35621848	25891	PAMR1	0.00669933
Parikshak2013:0012 Parikshak2013_M13	int618,int77:chr2:98998983..100146146	chr2:99390308..99622684	343990	KIAA1211L	0.00669933
Parikshak2013:0012 Parikshak2013_M13	int205:chr16:75152826..75211347	chr16:75125757..75220670	197257	LDHD	0.00669933
Parikshak2013:0012 Parikshak2013_M13	int520:chr1:116906839..116948712	chr1:116845794..116967396	476	ATP1A1	0.00669933
Parikshak2013:0012 Parikshak2013_M13	int604:chr10:91057358..91185257	chr10:90953325..91081796	3988	LIPA	0.00669933
Parikshak2013:0012 Parikshak2013_M13	int172,int492:chr14:24662857..24721665	chr14:24663142..24771576	100528064	NEDD8-MDP1	0.00669933
Parikshak2013:0012 Parikshak2013_M13	int954:chr2:27281034..27934711	chr2:27457439..27555960	7781	SLC30A3	0.00669933
Parikshak2013:0012 Parikshak2013_M13	int123,int408,int72:chr16:2014130..2289455	chr16:2241602..2334822	283871	PGP	0.00669933
Parikshak2013:0012 Parikshak2013_M13	int489:chr15:61434751..61469322	chr15:60760482..61591502	6095	RORA	0.00669933
Parikshak2013:0012 Parikshak2013_M13	int810:chr3:13156835..13205932	chr3:12918541..13184617	9922	IQSEC1	0.00669933
Parikshak2013:0012 Parikshak2013_M13	int640,int663:chr17:28733862..29738071	chr17:29601667..29718767	4974,2123	OMG,EVI2A	0.00669933
Parikshak2013:0012 Parikshak2013_M13	int691,int59:chr10:68988231..69896336	chr10:67652275..69525949	29119	CTNNA3	0.00669933
Parikshak2013:0012 Parikshak2013_M13	int66:chr5:133294384..133416974	chr5:133287565..133410824	7416	VDAC1	0.00669933
Parikshak2013:0012 Parikshak2013_M13	int96:chr9:74729250..74815119	chr9:74659510..74887140	9615	GDA	0.00669933
Parikshak2013:0012 Parikshak2013_M13	int560:chr12:56455524..56462323	chr12:56403808..56517291	2065	ERBB3	0.00669933
Parikshak2013:0012 Parikshak2013_M13	int631,int222,int501:chr2:62905539..64334456	chr2:63745742..63854330	4190	MDH1	0.00669933
Parikshak2013:0012 Parikshak2013_M13	int468:chr2:233465847..233523617	chr2:233400766..233567491	80303	EFHD1	0.00669933
Parikshak2013:0012 Parikshak2013_M13	int660:chr16:24099496..24106227	chr16:23777299..24251932	5579	PRKCB	0.00669933
Parikshak2013:0012 Parikshak2013_M13	int780:chr17:6368336..6437583	chr17:6334582..6529877	83394	PITPNM3	0.00669933
Parikshak2013:0012 Parikshak2013_M13	int360:chr12:110060137..110740470	chr12:110649031..110808897	488	ATP2A2	0.00669933
Parikshak2013:0012 Parikshak2013_M13	int290,int71:chr1:161976234..162111400	chr1:161969580..162359813	9722	NOS1AP	0.00669933
Parikshak2013:0012 Parikshak2013_M13	int167,int677:chr6:83911265..84176272	chr6:83900109..84210938	4199	ME1	0.00669933
Parikshak2013:0012 Parikshak2013_M13	int948:chr18:23805393..24047874	chr18:23736846..23991649	6875	TAF4B	0.00669933
Parikshak2013:0012 Parikshak2013_M13	int779:chr12:50271497..50281414	chr12:50240678..50390922	23017,363	FAIM2,AQP6	0.00669933
Parikshak2013:0012 Parikshak2013_M13	int2,int666:chr6:46044196..46150542	chr6:46106918..46529804	59084,10231	ENPP5,RCAN2	0.00669933
Parikshak2013:0012 Parikshak2013_M13	int550:chr1:112566033..112597493	chr1:112298453..112601777	3752	KCND3	0.00669933
Parikshak2013:0012 Parikshak2013_M13	int359,int140:chr10:49842179..49902125	chr10:49634067..49930561	58504	ARHGAP22	0.00669933
Parikshak2013:0012 Parikshak2013_M13	int326:chr15:78563735..78563735	chr15:78371718..78597049	3419,23205,55466	IDH3A,ACSBG1,DNAJA4	0.00669933
Parikshak2013:0012 Parikshak2013_M13	int860,int936:chr15:58628415..58835317	chr15:58654174..58881073	3990	LIPC	0.00669933
Parikshak2013:0012 Parikshak2013_M13	int358:chr1:192991783..193429853	chr1:193045594..193145244	51022	GLRX2	0.00669933
Parikshak2013:0012 Parikshak2013_M13	int516:chr17:66547409..66560097	chr17:66339763..66567457	5573	PRKAR1A	0.00669933
Parikshak2013:0012 Parikshak2013_M13	int833:chr8:82689212..82873063	chr8:82549150..82691748	3612,92421	IMPA1,CHMP4C	0.00669933
Parikshak2013:0012 Parikshak2013_M13	int51:chr1:77899667..78819970	chr1:78400635..78502995	11080	DNAJB4	0.00669933
Parikshak2013:0012 Parikshak2013_M13	int766:chr12:69269375..69289749	chr12:69224955..69427020	1368	CPM	0.00669933
Parikshak2013:0012 Parikshak2013_M13	int236:chr16:66874574..66874574	chr16:66808281..66908049	766	CA7	0.00669933
Parikshak2013:0012 Parikshak2013_M13	int701:chr2:173620465..173716172	chr2:173530524..173937620	11069	RAPGEF4	0.00669933
Parikshak2013:0012 Parikshak2013_M13	int893:chr11:10536116..10561245	chr11:10401867..10549126	272	AMPD3	0.00669933
Iossifov2014:0007 Iossifov2014_MendelianDiseaseGenes	int955:chr10:100240052..100240617	chr10:100155954..100276720	3257	HPS1	0.0223978
Iossifov2014:0007 Iossifov2014_MendelianDiseaseGenes	int910:chr1:169356004..169460865	chr1:169413148..169525208	10560	SLC19A2	0.0223978
Iossifov2014:0007 Iossifov2014_MendelianDiseaseGenes	int543:chr15:72097992..73161393	chr15:72098360..72480440	4649	MYO9A	0.0223978
Iossifov2014:0007 Iossifov2014_MendelianDiseaseGenes	int1:chr8:119093994..119128220	chr8:118791601..119194058	2131	EXT1	0.0223978
Iossifov2014:0007 Iossifov2014_MendelianDiseaseGenes	int275,int488,int178,int78,int259,int715,int886,int432,int23,int598,int745,int325,int196:chr8:8088877..11886722	chr8:11583081..11716818	2222	FDFT1	0.0223978
Iossifov2014:0007 Iossifov2014_MendelianDiseaseGenes	int807,int254:chr3:50058610..50412945	chr3:50380043..50611675	9254	CACNA2D2	0.0223978
Iossifov2014:0007 Iossifov2014_MendelianDiseaseGenes	int251:chr18:20897698..21368907	chr18:21091462..21236581	4864	NPC1	0.0223978
Iossifov2014:0007 Iossifov2014_MendelianDiseaseGenes	int524,int169,int177,int40:chr17:72839130..73534485	chr17:72892175..72989358	124590	USH1G	0.0223978
Iossifov2014:0007 Iossifov2014_MendelianDiseaseGenes	int724:chr17:1627704..1657899	chr17:1401282..1658176	5306,10594	PITPNA,PRPF8	0.0223978
Iossifov2014:0007 Iossifov2014_MendelianDiseaseGenes	int172,int492:chr14:24662857..24721665	chr14:24714743..24810833	5875	RABGGTA	0.0223978
Iossifov2014:0007 Iossifov2014_MendelianDiseaseGenes	int462:chr11:44106142..44285857	chr11:44047098..44286980	2132	EXT2	0.0223978
Iossifov2014:0007 Iossifov2014_MendelianDiseaseGenes	int637:chr11:2956783..3091788	chr11:2929502..3020650	7262	PHLDA2	0.0223978
Iossifov2014:0007 Iossifov2014_MendelianDiseaseGenes	int234:chr8:94306996..94698775	chr8:94697071..94850347	91147	TMEM67	0.0223978
Iossifov2014:0007 Iossifov2014_MendelianDiseaseGenes	int114:chr14:92544769..92639767	chr14:92504895..92642965	4287	ATXN3	0.0223978
Iossifov2014:0007 Iossifov2014_MendelianDiseaseGenes	int690:chr22:38387223..38387224	chr22:38348318..38450539	6663	SOX10	0.0223978
Iossifov2014:0007 Iossifov2014_MendelianDiseaseGenes	int751:chr2:30053857..30053857	chr2:29395639..30214477	238	ALK	0.0223978
Iossifov2014:0007 Iossifov2014_MendelianDiseaseGenes	int170:chr14:73343471..73717433	chr14:73533142..73710399	5663	PSEN1	0.0223978
Iossifov2014:0007 Iossifov2014_MendelianDiseaseGenes	int807,int254:chr3:50058610..50412945	chr3:49907476..50134685	10180	RBM6	0.0223978
Iossifov2014:0007 Iossifov2014_MendelianDiseaseGenes	int73:chr19:7636751..7731619	chr19:7517495..7646653	57192,10908	MCOLN1,PNPLA6	0.0223978
Iossifov2014:0007 Iossifov2014_MendelianDiseaseGenes	int123,int408,int72:chr16:2014130..2289455	chr16:2118710..2255899	5310	PKD1	0.0223978
Iossifov2014:0007 Iossifov2014_MendelianDiseaseGenes	int626,int826:chr8:72179780..72239230	chr8:72089667..72344467	2138	EYA1	0.0223978
Iossifov2014:0007 Iossifov2014_MendelianDiseaseGenes	int640,int663:chr17:28733862..29738071	chr17:29351944..29724695	4763	NF1	0.0223978
Iossifov2014:0007 Iossifov2014_MendelianDiseaseGenes	int990:chr2:202613635..202666254	chr2:202544985..202715895	57679	ALS2	0.0223978
Iossifov2014:0007 Iossifov2014_MendelianDiseaseGenes	int785:chr8:38014429..38316849	chr8:38248655..38396352	2260	FGFR1	0.0223978
Iossifov2014:0007 Iossifov2014_MendelianDiseaseGenes	int360:chr12:110060137..110740470	chr12:110649031..110808897	488	ATP2A2	0.0223978
Iossifov2014:0007 Iossifov2014_MendelianDiseaseGenes	int590:chr18:55310072..55325982	chr18:55293658..55540327	5205	ATP8B1	0.0223978
Iossifov2014:0007 Iossifov2014_MendelianDiseaseGenes	int210:chr6:16714217..16753147	chr6:16279342..16831721	6310	ATXN1	0.0223978
Iossifov2014:0007 Iossifov2014_MendelianDiseaseGenes	int807,int254:chr3:50058610..50412945	chr3:50234989..50334602	7869	SEMA3B	0.0223978
Iossifov2014:0007 Iossifov2014_MendelianDiseaseGenes	int537,int523:chr6:162933134..163273912	chr6:161748589..163756524	5071,135138	PARK2,PACRG	0.0223978
LindbladToh2011:0002 LindbladToh2011_2xPARS	int773:chr11:131582093..131606071	chr11:131170370..132226716	50863	NTM	0.0259974
LindbladToh2011:0002 LindbladToh2011_2xPARS	int747,int894:chr8:32192790..32816348	chr8:31427267..32642558	3084	NRG1	0.0259974
LindbladToh2011:0002 LindbladToh2011_2xPARS	int15,int62,int95,int225:chr9:119138164..119529014	chr9:118846070..120247317	5069,23245	PAPPA,ASTN2	0.0259974
LindbladToh2011:0002 LindbladToh2011_2xPARS	int170:chr14:73343471..73717433	chr14:73455220..73608076	58517	RBM25	0.0259974
LindbladToh2011:0002 LindbladToh2011_2xPARS	int309,int456,int686:chr9:9209799..9440297	chr9:8294245..10682723	5789	PTPRD	0.0259974
LindbladToh2011:0002 LindbladToh2011_2xPARS	int129:chr2:77119035..77358977	chr2:76954849..77819502	80059	LRRTM4	0.0259974
LindbladToh2011:0002 LindbladToh2011_2xPARS	int537,int523:chr6:162933134..163273912	chr6:161748589..163218834	5071	PARK2	0.0259974
LindbladToh2011:0002 LindbladToh2011_2xPARS	int585:chr6:69130024..69782518	chr6:69275631..70119403	577	ADGRB3	0.0259974
LindbladToh2011:0002 LindbladToh2011_2xPARS	int697:chr7:16408071..16480989	chr7:16107151..16530947	729920	ISPD	0.0259974
LindbladToh2011:0002 LindbladToh2011_2xPARS	int719:chr6:63808931..64539397	chr6:64409875..66487118	346007	EYS	0.0259974
LindbladToh2011:0002 LindbladToh2011_2xPARS	int338:chr11:15774451..16059173	chr11:15967994..16567935	55553	SOX6	0.0259974
LindbladToh2011:0002 LindbladToh2011_2xPARS	int695,int832:chr3:55062106..55097273	chr3:54086692..55128584	55799,57408	CACNA2D3,LRTM1	0.0259974
LindbladToh2011:0002 LindbladToh2011_2xPARS	int765,int18:chr3:179812133..180292831	chr3:179492746..179824841	51555	PEX5L	0.0259974
LindbladToh2011:0002 LindbladToh2011_2xPARS	int621,int453:chr2:206050355..206495505	chr2:206477223..206682857	8828	NRP2	0.0259974
LindbladToh2011:0002 LindbladToh2011_2xPARS	int700:chr3:190211244..190222954	chr3:190161839..190394986	3556	IL1RAP	0.0259974
LindbladToh2011:0002 LindbladToh2011_2xPARS	int86,int919:chr16:6656073..7604361	chr16:5999131..7783340	54715	RBFOX1	0.0259974
LindbladToh2011:0002 LindbladToh2011_2xPARS	int194:chr14:68970211..69010925	chr14:68216495..69082738	5890	RAD51B	0.0259974
LindbladToh2011:0002 LindbladToh2011_2xPARS	int849:chr1:98297731..98562260	chr1:97523299..98456615	1806	DPYD	0.0259974
LindbladToh2011:0002 LindbladToh2011_2xPARS	int939:chr6:109279211..109468770	chr6:109287639..109485708	27244	SESN1	0.0259974
LindbladToh2011:0002 LindbladToh2011_2xPARS	int738:chr17:2400876..2410593	chr17:2299347..2485200	79066	METTL16	0.0259974
LindbladToh2011:0002 LindbladToh2011_2xPARS	int521:chr2:179757052..179856304	chr2:179674483..179984786	285025	CCDC141	0.0259974
LindbladToh2011:0002 LindbladToh2011_2xPARS	int631,int222,int501:chr2:62905539..64334456	chr2:62830985..63293621	23301	EHBP1	0.0259974
LindbladToh2011:0002 LindbladToh2011_2xPARS	int928:chr20:41780017..41783638	chr20:40681391..41888557	11122	PTPRT	0.0259974
LindbladToh2011:0002 LindbladToh2011_2xPARS	int953:chr16:83692881..83756988	chr16:82590398..83850215	1012	CDH13	0.0259974
LindbladToh2011:0002 LindbladToh2011_2xPARS	int835,int632:chr3:143499552..143872124	chr3:142964063..143637373	285195	SLC9A9	0.0259974
LindbladToh2011:0002 LindbladToh2011_2xPARS	int711:chr7:18065193..18092793	chr7:18056571..19056992	9734	HDAC9	0.0259974
LindbladToh2011:0002 LindbladToh2011_2xPARS	int909:chr12:86971635..87287609	chr12:86353036..87302681	25834	MGAT4C	0.0259974
LindbladToh2011:0002 LindbladToh2011_2xPARS	int526:chr10:117978024..117997389	chr10:117796441..118103126	2674	GFRA1	0.0259974
LindbladToh2011:0002 LindbladToh2011_2xPARS	int872:chr3:65307541..65327414	chr3:65319905..66094509	9223	MAGI1	0.0259974
LindbladToh2011:0002 LindbladToh2011_2xPARS	int751:chr2:30053857..30053857	chr2:29395639..30214477	238	ALK	0.0259974
LindbladToh2011:0002 LindbladToh2011_2xPARS	int884:chr2:150160052..150193025	chr2:150116498..150350659	130574	LYPD6	0.0259974
LindbladToh2011:0002 LindbladToh2011_2xPARS	int36:chr1:37202097..37261085	chr1:37241127..37569844	2899	GRIK3	0.0259974
LindbladToh2011:0002 LindbladToh2011_2xPARS	int369,int465,int874:chr6:143919229..144207531	chr6:143859316..144172322	9749	PHACTR2	0.0259974
LindbladToh2011:0002 LindbladToh2011_2xPARS	int847,int470:chr4:186491772..186859331	chr4:186401814..186947870	27295,8470	PDLIM3,SORBS2	0.0259974
LindbladToh2011:0002 LindbladToh2011_2xPARS	int8,int750:chr11:132912844..132936734	chr11:132264874..133472403	4978	OPCML	0.0259974
LindbladToh2011:0002 LindbladToh2011_2xPARS	int807,int254:chr3:50058610..50412945	chr3:50380043..50611675	9254	CACNA2D2	0.0259974
LindbladToh2011:0002 LindbladToh2011_2xPARS	int202:chr13:60130083..60406796	chr13:60219720..60808119	81624	DIAPH3	0.0259974
LindbladToh2011:0002 LindbladToh2011_2xPARS	int991:chr12:16205657..16254406	chr12:15994105..16210315	51071	DERA	0.0259974
LindbladToh2011:0002 LindbladToh2011_2xPARS	int791:chr2:214845451..214845453	chr2:214079102..215295225	79582	SPAG16	0.0259974
LindbladToh2011:0001 LindbladToh2011_2xHARs	int135,int45,int386:chr3:70900385..71194680	chr3:70983864..71703140	27086	FOXP1	0.0273973
LindbladToh2011:0001 LindbladToh2011_2xHARs	int899:chr17:11190747..11234195	chr17:11074739..11487380	388336	SHISA6	0.0273973
LindbladToh2011:0001 LindbladToh2011_2xHARs	int621,int453:chr2:206050355..206495505	chr2:205340515..206504886	117583	PARD3B	0.0273973
LindbladToh2011:0001 LindbladToh2011_2xHARs	int1:chr8:119093994..119128220	chr8:118791601..119194058	2131	EXT1	0.0273973
LindbladToh2011:0001 LindbladToh2011_2xHARs	int953:chr16:83692881..83756988	chr16:82590398..83850215	1012	CDH13	0.0273973
LindbladToh2011:0001 LindbladToh2011_2xHARs	int155:chr7:127263886..127788296	chr7:127222201..127752659	27044	SND1	0.0273973
LindbladToh2011:0001 LindbladToh2011_2xHARs	int862:chr4:20253438..20253438	chr4:20183527..20642184	9353	SLIT2	0.0273973
LindbladToh2011:0001 LindbladToh2011_2xHARs	int27,int195:chr5:153573938..153690010	chr5:153500294..153820543	55568	GALNT10	0.0273973
LindbladToh2011:0001 LindbladToh2011_2xHARs	int478:chr20:21056805..21246620	chr20:21036623..21247258	55857	KIZ	0.0273973
LindbladToh2011:0001 LindbladToh2011_2xHARs	int376:chr9:14366507..14373886	chr9:14061841..14468982	4781	NFIB	0.0273973
LindbladToh2011:0001 LindbladToh2011_2xHARs	int524,int169,int177,int40:chr17:72839130..73534485	chr17:72861896..72966087	347741	OTOP3	0.0273973
LindbladToh2011:0001 LindbladToh2011_2xHARs	int391:chr2:237021346..237136992	chr2:236332732..237060444	116987	AGAP1	0.0273973
LindbladToh2011:0001 LindbladToh2011_2xHARs	int646:chr7:147754924..147812966	chr7:145743452..148138088	26047	CNTNAP2	0.0273973
LindbladToh2011:0001 LindbladToh2011_2xHARs	int247:chr1:2944527..2990994	chr1:2915741..3375185	63976	PRDM16	0.0273973
LindbladToh2011:0001 LindbladToh2011_2xHARs	int786,int958,int612:chr2:31245804..31351249	chr2:31113330..31431592	79623	GALNT14	0.0273973
LindbladToh2011:0001 LindbladToh2011_2xHARs	int322:chr11:114040325..114092582	chr11:113860430..114141397	7704	ZBTB16	0.0273973
LindbladToh2011:0001 LindbladToh2011_2xHARs	int891:chr13:95036778..95082174	chr13:93809077..95080273	10082	GPC6	0.0273973
LindbladToh2011:0001 LindbladToh2011_2xHARs	int785:chr8:38014429..38316849	chr8:38112560..38309790	54904	WHSC1L1	0.0273973
LindbladToh2011:0001 LindbladToh2011_2xHARs	int773:chr11:131582093..131606071	chr11:131170370..132226716	50863	NTM	0.0273973
LindbladToh2011:0001 LindbladToh2011_2xHARs	int106,int182,int348:chr10:103804114..104209407	chr10:103585355..103885932	79591	C10ORF76	0.0273973
LindbladToh2011:0001 LindbladToh2011_2xHARs	int711:chr7:18065193..18092793	chr7:18056571..19056992	9734	HDAC9	0.0273973
LindbladToh2011:0001 LindbladToh2011_2xHARs	int350,int877:chr2:141959134..142485218	chr2:140968995..142959270	53353	LRP1B	0.0273973
LindbladToh2011:0001 LindbladToh2011_2xHARs	int991:chr12:16205657..16254406	chr12:15994105..16210315	51071	DERA	0.0273973
LindbladToh2011:0001 LindbladToh2011_2xHARs	int568:chr7:114337652..114387041	chr7:113985051..114353827	93986	FOXP2	0.0273973
LindbladToh2011:0001 LindbladToh2011_2xHARs	int746:chr5:35054522..35078728	chr5:34978205..35118240	64902	AGXT2	0.0273973
LindbladToh2011:0001 LindbladToh2011_2xHARs	int655:chr10:16557186..16617359	chr10:16408941..16575744	9317	PTER	0.0273973
LindbladToh2011:0001 LindbladToh2011_2xHARs	int309,int456,int686:chr9:9209799..9440297	chr9:8294245..10682723	5789	PTPRD	0.0273973
LindbladToh2011:0001 LindbladToh2011_2xHARs	int86,int919:chr16:6656073..7604361	chr16:5999131..7783340	54715	RBFOX1	0.0273973
LindbladToh2011:0001 LindbladToh2011_2xHARs	int811,int467,int28,int837:chr9:16679305..16910872	chr9:16389500..16940786	54796	BNC2	0.0273973
LindbladToh2011:0001 LindbladToh2011_2xHARs	int814:chr10:108930271..109353186	chr10:108313420..108994466	114815	SORCS1	0.0273973
LindbladToh2011:0001 LindbladToh2011_2xHARs	int364:chr7:1877501..2247496	chr7:1835427..2342583	8379	MAD1L1	0.0273973
LindbladToh2011:0001 LindbladToh2011_2xHARs	int15,int62,int95,int225:chr9:119138164..119529014	chr9:118846070..119184600	5069	PAPPA	0.0273973
LindbladToh2011:0001 LindbladToh2011_2xHARs	int44:chr3:6880004..6902624	chr3:6832801..7803218	2917	GRM7	0.0273973
LindbladToh2011:0001 LindbladToh2011_2xHARs	int74:chr5:178696394..178698324	chr5:178517851..178842431	9509	ADAMTS2	0.0273973
LindbladToh2011:0001 LindbladToh2011_2xHARs	int563,int591:chr17:64251733..64534580	chr17:64228925..64826862	5578	PRKCA	0.0273973
LindbladToh2011:0001 LindbladToh2011_2xHARs	int198,int315,int22:chr20:14696013..14913496	chr20:13906145..16053841	140733	MACROD2	0.0273973
LindbladToh2011:0001 LindbladToh2011_2xHARs	int719:chr6:63808931..64539397	chr6:64409875..66487118	346007	EYS	0.0273973
LindbladToh2011:0001 LindbladToh2011_2xHARs	int518:chr14:79681303..79767060	chr14:78800073..80354633	9369	NRXN3	0.0273973
LindbladToh2011:0001 LindbladToh2011_2xHARs	int713:chr13:67306783..67472713	chr13:66856965..67874468	5101	PCDH9	0.0273973
LindbladToh2011:0001 LindbladToh2011_2xHARs	int47:chr15:90890799..91083353	chr15:90861472..91065475	8826	IQGAP1	0.0273973
LindbladToh2011:0001 LindbladToh2011_2xHARs	int969:chr8:2827474..2911322	chr8:2772874..4922328	64478	CSMD1	0.0273973
LindbladToh2011:0001 LindbladToh2011_2xHARs	int264:chr10:106387449..106758234	chr10:106330858..107045000	22986	SORCS3	0.0273973
LindbladToh2011:0001 LindbladToh2011_2xHARs	int688:chr22:36910391..36941780	chr22:36936915..37168690	10369	CACNG2	0.0273973
DeRubeis2014:0005 DeRubeis2014_TRANSCRIPTION	int609:chr5:75691606..75743907	chr5:75629079..76023957	10788	IQGAP2	0.0755924
DeRubeis2014:0005 DeRubeis2014_TRANSCRIPTION	int890:chr22:24194941..24204630	chr22:24059149..24196705	6598	SMARCB1	0.0755924
DeRubeis2014:0005 DeRubeis2014_TRANSCRIPTION	int188,int50:chr19:30237263..30328851	chr19:30232900..30335215	898	CCNE1	0.0755924
DeRubeis2014:0005 DeRubeis2014_TRANSCRIPTION	int206:chr12:53716133..53929672	chr12:53703978..53830226	6667	SP1	0.0755924
DeRubeis2014:0005 DeRubeis2014_TRANSCRIPTION	int691,int59:chr10:68988231..69896336	chr10:69574426..69698147	23411	SIRT1	0.0755924
DeRubeis2014:0005 DeRubeis2014_TRANSCRIPTION	int648:chr1:164765566..164943923	chr1:164458596..164841060	5087	PBX1	0.0755924
DeRubeis2014:0005 DeRubeis2014_TRANSCRIPTION	int631,int222,int501:chr2:62905539..64334456	chr2:64099666..64316214	51542	VPS54	0.0755924
DeRubeis2014:0005 DeRubeis2014_TRANSCRIPTION	int128,int398,int525,int610:chr7:148305430..148645341	chr7:148325932..148518202	8454	CUL1	0.0755924
DeRubeis2014:0005 DeRubeis2014_TRANSCRIPTION	int108,int353:chr19:49451217..49659014	chr19:49518396..49631870	6625	SNRNP70	0.0755924
DeRubeis2014:0005 DeRubeis2014_TRANSCRIPTION	int489:chr15:61434751..61469322	chr15:60760482..61591502	6095	RORA	0.0755924
DeRubeis2014:0005 DeRubeis2014_TRANSCRIPTION	int358:chr1:192991783..193429853	chr1:193021087..193243942	79577	CDC73	0.0755924
DeRubeis2014:0005 DeRubeis2014_TRANSCRIPTION	int917:chr21:40505513..40839630	chr21:40537403..40755712	54014	BRWD1	0.0755924
DeRubeis2014:0005 DeRubeis2014_TRANSCRIPTION	int135,int45,int386:chr3:70900385..71194680	chr3:70983864..71703140	27086	FOXP1	0.0755924
DeRubeis2014:0005 DeRubeis2014_TRANSCRIPTION	int89:chr12:132417451..132571956	chr12:132364464..132585011	57634	EP400	0.0755924
Iossifov2014:0005 Iossifov2014_EssentialGenes	int640,int663:chr17:28733862..29738071	chr17:29351944..29724695	4763	NF1	0.080092
Iossifov2014:0005 Iossifov2014_EssentialGenes	int105:chr16:51163406..51211595	chr16:51149885..51255183	6299	SALL1	0.080092
Iossifov2014:0005 Iossifov2014_EssentialGenes	int170:chr14:73343471..73717433	chr14:73533142..73710399	5663	PSEN1	0.080092
Iossifov2014:0005 Iossifov2014_EssentialGenes	int247:chr1:2944527..2990994	chr1:2915741..3375185	63976	PRDM16	0.080092
Iossifov2014:0005 Iossifov2014_EssentialGenes	int73:chr19:7636751..7731619	chr19:7529037..7646653	10908	PNPLA6	0.080092
Iossifov2014:0005 Iossifov2014_EssentialGenes	int449:chr3:107823224..108545856	chr3:107859658..108011417	55081	IFT57	0.080092
Iossifov2014:0005 Iossifov2014_EssentialGenes	int436:chr22:20031102..20162758	chr22:19843040..20119400	10587,54487	TXNRD2,DGCR8	0.080092
Iossifov2014:0005 Iossifov2014_EssentialGenes	int134:chr12:70913328..70944714	chr12:70890631..71101220	5787	PTPRB	0.080092
Iossifov2014:0005 Iossifov2014_EssentialGenes	int364:chr7:1877501..2247496	chr7:1835427..2342583	8379	MAD1L1	0.080092
Iossifov2014:0005 Iossifov2014_EssentialGenes	int917:chr21:40505513..40839630	chr21:40694240..40791047	3150	HMGN1	0.080092
Iossifov2014:0005 Iossifov2014_EssentialGenes	int688:chr22:36910391..36941780	chr22:36657322..37168690	4627,25828,10369	MYH9,TXN2,CACNG2	0.080092
Iossifov2014:0005 Iossifov2014_EssentialGenes	int123,int408,int72:chr16:2014130..2289455	chr16:2027989..2305743	7249,5310,64223,1877	TSC2,PKD1,MLST8,E4F1	0.080092
Iossifov2014:0005 Iossifov2014_EssentialGenes	int494:chr13:46514492..46658712	chr13:46607321..46749211	1361	CPB2	0.080092
Iossifov2014:0005 Iossifov2014_EssentialGenes	int785:chr8:38014429..38316849	chr8:37893010..38017598	9070	ASH2L	0.080092
Iossifov2014:0005 Iossifov2014_EssentialGenes	int942:chr1:47687084..47997658	chr1:47661961..47849819	6886,6491	TAL1,STIL	0.080092
Iossifov2014:0005 Iossifov2014_EssentialGenes	int320:chr1:13954726..13956807	chr1:13840251..13964452	10630	PDPN	0.080092
Iossifov2014:0005 Iossifov2014_EssentialGenes	int584,int866,int491:chr17:55547695..55777985	chr17:55263930..55777299	124540	MSI2	0.080092
Iossifov2014:0005 Iossifov2014_EssentialGenes	int997:chr12:125097041..125097710	chr12:124788956..125122010	9612	NCOR2	0.080092
Iossifov2014:0005 Iossifov2014_EssentialGenes	int443:chr13:113745941..113745941	chr13:113707112..113997741	2159,55795,3916	F10,PCID2,LAMP1	0.080092
Iossifov2014:0005 Iossifov2014_EssentialGenes	int657:chr6:44852734..45396544	chr6:45226053..45538819	860	RUNX2	0.080092
Iossifov2014:0005 Iossifov2014_EssentialGenes	int756:chr3:20191506..20373412	chr3:20011523..20215896	8850	KAT2B	0.080092
Iossifov2014:0005 Iossifov2014_EssentialGenes	int711:chr7:18065193..18092793	chr7:18056571..19056992	9734	HDAC9	0.080092
Iossifov2014:0005 Iossifov2014_EssentialGenes	int857:chr19:48690847..48697961	chr19:48598701..48743860	3978	LIG1	0.080092
Iossifov2014:0005 Iossifov2014_EssentialGenes	int809:chr12:52268138..52334814	chr12:52231201..52410863	94,91	ACVRL1,ACVR1B	0.080092
Iossifov2014:0005 Iossifov2014_EssentialGenes	int89:chr12:132417451..132571956	chr12:132364464..132585011	57634	EP400	0.080092
Iossifov2014:0005 Iossifov2014_EssentialGenes	int568:chr7:114337652..114387041	chr7:113985051..114353827	93986	FOXP2	0.080092
Iossifov2014:0005 Iossifov2014_EssentialGenes	int108,int353:chr19:49451217..49659014	chr19:49203841..49485055	54922,23645,581	RASIP1,PPP1R15A,BAX	0.080092
Iossifov2014:0005 Iossifov2014_EssentialGenes	int16,int7,int220:chr7:132938039..133542099	chr7:132867822..133770513	60412	EXOC4	0.080092
Iossifov2014:0005 Iossifov2014_EssentialGenes	int974:chr8:41723550..41935324	chr8:41490743..41979544	286,7994	ANK1,KAT6A	0.080092
Iossifov2014:0005 Iossifov2014_EssentialGenes	int690:chr22:38387223..38387224	chr22:38348318..38450539	6663	SOX10	0.080092
Iossifov2014:0005 Iossifov2014_EssentialGenes	int355:chr7:34943327..35238530	chr7:35222041..35363711	57057	TBX20	0.080092
Iossifov2014:0005 Iossifov2014_EssentialGenes	int555:chr7:93202612..93276888	chr7:93033798..93274042	799	CALCR	0.080092
Iossifov2014:0005 Iossifov2014_EssentialGenes	int193:chr2:61036023..61062412	chr2:61038629..61175291	5966	REL	0.080092
Iossifov2014:0005 Iossifov2014_EssentialGenes	int631,int222,int501:chr2:62905539..64334456	chr2:63745742..63854330	4190	MDH1	0.080092
Iossifov2014:0005 Iossifov2014_EssentialGenes	int902:chr22:46396775..46396775	chr22:46296247..46443008	7477	WNT7B	0.080092
Iossifov2014:0005 Iossifov2014_EssentialGenes	int776:chr19:6312290..6323207	chr19:6190391..6349959	4298	MLLT1	0.080092
Iossifov2014:0005 Iossifov2014_EssentialGenes	int822:chr2:72395464..73084166	chr2:73044511..73139289	6697	SPR	0.080092
Iossifov2014:0005 Iossifov2014_EssentialGenes	int122,int331:chr1:184737999..184945900	chr1:184944550..185091740	6045	RNF2	0.080092
Iossifov2014:0005 Iossifov2014_EssentialGenes	int528:chr2:230618034..230870007	chr2:230608552..230856725	9320	TRIP12	0.080092
Iossifov2014:0005 Iossifov2014_EssentialGenes	int265:chr5:130655526..131539255	chr5:131339484..131431863	1437	CSF2	0.080092
Iossifov2014:0005 Iossifov2014_EssentialGenes	int358:chr1:192991783..193429853	chr1:192961495..193243942	51377,79577	UCHL5,CDC73	0.080092
Iossifov2014:0005 Iossifov2014_EssentialGenes	int861,int395:chr19:4856287..4872275	chr19:4833091..4982165	29128	UHRF1	0.080092
Iossifov2014:0005 Iossifov2014_EssentialGenes	int946:chr11:9964346..10331664	chr11:10256526..10348949	133	ADM	0.080092
Iossifov2014:0005 Iossifov2014_EssentialGenes	int275,int488,int178,int78,int259,int715,int886,int432,int23,int598,int745,int325,int196:chr8:8088877..11886722	chr8:10602470..10767409	54984	PINX1	0.080092
Iossifov2014:0005 Iossifov2014_EssentialGenes	int785:chr8:38014429..38316849	chr8:38248655..38396352	2260	FGFR1	0.080092
Iossifov2014:0005 Iossifov2014_EssentialGenes	int183:chr3:47588649..48326433	chr3:48178667..48299801	993	CDC25A	0.080092
Iossifov2014:0005 Iossifov2014_EssentialGenes	int434,int464:chr14:23020706..23082027	chr14:23013806..23128143	1603	DAD1	0.080092
Iossifov2014:0005 Iossifov2014_EssentialGenes	int338:chr11:15774451..16059173	chr11:15967994..16567935	55553	SOX6	0.080092
Iossifov2014:0005 Iossifov2014_EssentialGenes	int516:chr17:66547409..66560097	chr17:66339763..66567457	5573	PRKAR1A	0.080092
Iossifov2014:0005 Iossifov2014_EssentialGenes	int135,int45,int386:chr3:70900385..71194680	chr3:70983864..71703140	27086	FOXP1	0.080092
Iossifov2014:0005 Iossifov2014_EssentialGenes	int648:chr1:164765566..164943923	chr1:164458596..164841060	5087	PBX1	0.080092
Iossifov2014:0005 Iossifov2014_EssentialGenes	int979:chr10:26160650..26484154	chr10:26435235..26613491	2572	GAD2	0.080092
Iossifov2014:0005 Iossifov2014_EssentialGenes	int625,int729:chr8:109067078..109588327	chr8:108891543..109165913	340419	RSPO2	0.080092
Iossifov2014:0005 Iossifov2014_EssentialGenes	int699:chr16:8968067..9079252	chr16:8965950..9127341	7874	USP7	0.080092
Iossifov2014:0005 Iossifov2014_EssentialGenes	int387:chr9:101858054..101931740	chr9:101797370..101936473	7046	TGFBR1	0.080092
Iossifov2014:0005 Iossifov2014_EssentialGenes	int563,int591:chr17:64251733..64534580	chr17:64188146..64295556	350	APOH	0.080092
Iossifov2014:0005 Iossifov2014_EssentialGenes	int621,int453:chr2:206050355..206495505	chr2:206477223..206682857	8828	NRP2	0.080092
Iossifov2014:0005 Iossifov2014_EssentialGenes	int987,int495:chr10:80878219..80972653	chr10:80758791..81096285	57178	ZMIZ1	0.080092
Iossifov2014:0005 Iossifov2014_EssentialGenes	int206:chr12:53716133..53929672	chr12:53885842..54090199	11016	ATF7	0.080092
Iossifov2014:0005 Iossifov2014_EssentialGenes	int350,int877:chr2:141959134..142485218	chr2:140968995..142959270	53353	LRP1B	0.080092
Iossifov2014:0005 Iossifov2014_EssentialGenes	int641:chr18:32622168..32926744	chr18:32892171..32994431	7572	ZNF24	0.080092
Iossifov2014:0005 Iossifov2014_EssentialGenes	int206:chr12:53716133..53929672	chr12:53584349..53845318	5916,9700,6667,269	RARG,ESPL1,SP1,AMHR2	0.080092
Iossifov2014:0005 Iossifov2014_EssentialGenes	int188,int50:chr19:30237263..30328851	chr19:30232900..30335215	898	CCNE1	0.080092
Iossifov2014:0005 Iossifov2014_EssentialGenes	int927:chr8:23441600..23472541	chr8:23316362..23450063	51312	SLC25A37	0.080092
Iossifov2014:0005 Iossifov2014_EssentialGenes	int709:chr1:212882450..213004927	chr1:212961596..213092705	28982	FLVCR1	0.080092
Iossifov2014:0005 Iossifov2014_EssentialGenes	int118:chr4:160185669..160355746	chr4:160118997..160301301	9693	RAPGEF2	0.080092
Iossifov2014:0005 Iossifov2014_EssentialGenes	int511,int162:chr21:41451731..41512161	chr21:41364342..42289039	1826	DSCAM	0.080092
Iossifov2014:0005 Iossifov2014_EssentialGenes	int527:chr1:182693381..182751046	chr1:182738438..182877117	1660	DHX9	0.080092
Iossifov2014:0005 Iossifov2014_EssentialGenes	int896:chr4:140664444..140676533	chr4:140617545..141145233	55534	MAML3	0.080092
Iossifov2014:0005 Iossifov2014_EssentialGenes	int106,int182,int348:chr10:103804114..104209407	chr10:104193718..104413214	51684	SUFU	0.080092
Iossifov2014:0005 Iossifov2014_EssentialGenes	int378:chr15:96835281..96866320	chr15:96799156..96903492	7026	NR2F2	0.080092
Iossifov2014:0005 Iossifov2014_EssentialGenes	int524,int169,int177,int40:chr17:72839130..73534485	chr17:73249060..73471790	60386,2885	SLC25A19,GRB2	0.080092
Iossifov2014:0005 Iossifov2014_EssentialGenes	int854,int733:chr6:53407591..53416684	chr6:53342139..53479927	2729	GCLC	0.080092
Iossifov2014:0005 Iossifov2014_EssentialGenes	int73:chr19:7636751..7731619	chr19:7664410..7764439	56949	XAB2	0.080092
Iossifov2014:0005 Iossifov2014_EssentialGenes	int870:chr22:46911745..46922134	chr22:46736730..47003067	9620	CELSR1	0.080092
Iossifov2014:0005 Iossifov2014_EssentialGenes	int462:chr11:44106142..44285857	chr11:44047098..44401716	2132,60529	EXT2,ALX4	0.080092
Iossifov2014:0005 Iossifov2014_EssentialGenes	int106,int182,int348:chr10:103804114..104209407	chr10:103847324..103950210	8861	LDB1	0.080092
Iossifov2014:0005 Iossifov2014_EssentialGenes	int312:chr5:108990708..109220991	chr5:108955066..109225326	4124	MAN2A1	0.080092
Iossifov2014:0005 Iossifov2014_EssentialGenes	int692,int698:chr1:198052735..198451136	chr1:198056107..198311548	140609	NEK7	0.080092
Iossifov2014:0005 Iossifov2014_EssentialGenes	int180:chr5:32461803..32493382	chr5:32334455..32514844	51663	ZFR	0.080092
Iossifov2014:0005 Iossifov2014_EssentialGenes	int807,int254:chr3:50058610..50412945	chr3:50194119..50316786	2771	GNAI2	0.080092
Iossifov2014:0005 Iossifov2014_EssentialGenes	int41:chr1:236899343..236938860	chr1:236888580..237087281	4548	MTR	0.080092
Iossifov2014:0005 Iossifov2014_EssentialGenes	int665,int231,int157:chr2:85339839..85394572	chr2:85290582..85557511	83439	TCF7L1	0.080092
Iossifov2014:0005 Iossifov2014_EssentialGenes	int668:chr6:142648056..142934867	chr6:142553055..142787403	57211	ADGRG6	0.080092
Iossifov2014:0005 Iossifov2014_EssentialGenes	int66:chr5:133294384..133416974	chr5:133287565..133410824	7416	VDAC1	0.080092
Iossifov2014:0005 Iossifov2014_EssentialGenes	int183:chr3:47588649..48326433	chr3:47607377..47893405	6599	SMARCC1	0.080092
Iossifov2014:0005 Iossifov2014_EssentialGenes	int172,int492:chr14:24662857..24721665	chr14:24688850..24868811	26277,4776	TINF2,NFATC4	0.080092
Iossifov2014:0005 Iossifov2014_EssentialGenes	int847,int470:chr4:186491772..186859331	chr4:186401814..186526712	27295	PDLIM3	0.080092
Iossifov2014:0005 Iossifov2014_EssentialGenes	int437,int428,int5,int514:chr6:43082651..43396608	chr6:42985354..43169244	9820,6722	CUL7,SRF	0.080092
Iossifov2014:0005 Iossifov2014_EssentialGenes	int292:chr13:114138733..114302622	chr13:114169055..114315788	7027	TFDP1	0.080092
Iossifov2014:0005 Iossifov2014_EssentialGenes	int631,int222,int501:chr2:62905539..64334456	chr2:64099666..64316214	51542	VPS54	0.080092
Iossifov2014:0005 Iossifov2014_EssentialGenes	int167,int677:chr6:83911265..84176272	chr6:83854592..83973655	5238	PGM3	0.080092
Iossifov2014:0005 Iossifov2014_EssentialGenes	int280:chr13:29138398..29148653	chr13:28854482..29139265	2321	FLT1	0.080092
Iossifov2014:0005 Iossifov2014_EssentialGenes	int739:chr8:128675771..128679252	chr8:128678314..128773680	4609	MYC	0.080092
Iossifov2014:0005 Iossifov2014_EssentialGenes	int590:chr18:55310072..55325982	chr18:55192072..55323969	2235	FECH	0.080092
Iossifov2014:0005 Iossifov2014_EssentialGenes	int391:chr2:237021346..237136992	chr2:237053878..237146652	2637	GBX2	0.080092
Iossifov2014:0005 Iossifov2014_EssentialGenes	int631,int222,int501:chr2:62905539..64334456	chr2:63207191..63304966	5013	OTX1	0.080092
Iossifov2014:0005 Iossifov2014_EssentialGenes	int10,int115:chr9:124971170..124982500	chr9:124944855..125061091	26468	LHX6	0.080092
Iossifov2014:0005 Iossifov2014_EssentialGenes	int506:chr7:2482781..2544564	chr7:2482162..2588810	3955	LFNG	0.080092
Iossifov2014:0005 Iossifov2014_EssentialGenes	int439:chr8:102474371..102488478	chr8:102434667..102701952	79977	GRHL2	0.080092
Iossifov2014:0005 Iossifov2014_EssentialGenes	int194:chr14:68970211..69010925	chr14:68216495..69082738	5890	RAD51B	0.080092
Iossifov2014:0005 Iossifov2014_EssentialGenes	int438:chr7:55165996..55165996	chr7:55016724..55295031	1956	EGFR	0.080092
Iossifov2014:0005 Iossifov2014_EssentialGenes	int360:chr12:110060137..110740470	chr12:110649031..110808897	488	ATP2A2	0.080092
Iossifov2014:0005 Iossifov2014_EssentialGenes	int200:chr19:11220410..11257018	chr19:10758728..11264505	1785,10498,6597,3949	DNM2,CARM1,SMARCA4,LDLR	0.080092
Iossifov2014:0005 Iossifov2014_EssentialGenes	int271:chr21:40135124..40217615	chr21:40107230..40216878	2114	ETS2	0.080092
Iossifov2014:0005 Iossifov2014_EssentialGenes	int128,int398,int525,int610:chr7:148305430..148645341	chr7:148325932..148651441	8454,2146	CUL1,EZH2	0.080092
Iossifov2014:0005 Iossifov2014_EssentialGenes	int890:chr22:24194941..24204630	chr22:24059149..24196705	6598	SMARCB1	0.080092
Iossifov2014:0005 Iossifov2014_EssentialGenes	int575:chr11:68588176..68796746	chr11:68502087..68679399	1374	CPT1A	0.080092
Iossifov2014:0005 Iossifov2014_EssentialGenes	int743:chr8:27475767..27564846	chr8:27562057..27682424	157570	ESCO2	0.080092
Iossifov2014:0005 Iossifov2014_EssentialGenes	int702:chr15:32995468..33062361	chr15:32940204..33046870	26585	GREM1	0.080092
Iossifov2014:0005 Iossifov2014_EssentialGenes	int440:chr15:102085503..102093632	chr15:101824132..102100187	5046	PCSK6	0.080092
Iossifov2014:0005 Iossifov2014_EssentialGenes	int926:chr1:156647931..156655253	chr1:156618555..156717189	10763	NES	0.080092
Iossifov2014:0005 Iossifov2014_EssentialGenes	int747,int894:chr8:32192790..32816348	chr8:31427267..32642558	3084	NRG1	0.080092
Iossifov2014:0005 Iossifov2014_EssentialGenes	int455:chr6:51803149..51826281	chr6:51460144..52022423	5314	PKHD1	0.080092
Iossifov2014:0005 Iossifov2014_EssentialGenes	int640,int663:chr17:28733862..29738071	chr17:29088987..29242883	79915	ATAD5	0.080092
Iossifov2014:0005 Iossifov2014_EssentialGenes	int654:chr3:172419276..172566275	chr3:172398474..172559264	1894	ECT2	0.080092
Iossifov2014:0005 Iossifov2014_EssentialGenes	int972:chr20:18058000..18104554	chr20:17984795..18189031	58495,57325	OVOL2,CSRP2BP	0.080092
Iossifov2014:0005 Iossifov2014_EssentialGenes	int871:chr19:47969394..48115083	chr19:47970890..48088515	8775	NAPA	0.080092
Iossifov2014:0005 Iossifov2014_EssentialGenes	int954:chr2:27281034..27934711	chr2:27647239..27782678	26160	IFT172	0.080092
Iossifov2014:0005 Iossifov2014_EssentialGenes	int275,int488,int178,int78,int259,int715,int886,int432,int23,int598,int745,int325,int196:chr8:8088877..11886722	chr8:11464427..11716818	2626,2222	GATA4,FDFT1	0.080092
Iossifov2014:0005 Iossifov2014_EssentialGenes	int618,int77:chr2:98998983..100146146	chr2:99996937..100176480	51455	REV1	0.080092
Iossifov2014:0005 Iossifov2014_EssentialGenes	int560:chr12:56455524..56462323	chr12:56403808..56517291	2065	ERBB3	0.080092
Iossifov2014:0005 Iossifov2014_EssentialGenes	int879:chr3:149255800..149293316	chr3:149215021..149491060	25937	WWTR1	0.080092
Iossifov2014:0005 Iossifov2014_EssentialGenes	int90:chr7:73877809..73987405	chr7:73798119..74195022	9569,2969	GTF2IRD1,GTF2I	0.080092
Iossifov2014:0005 Iossifov2014_EssentialGenes	int1:chr8:119093994..119128220	chr8:118791601..119194058	2131	EXT1	0.080092
Iossifov2014:0005 Iossifov2014_EssentialGenes	int691,int59:chr10:68988231..69896336	chr10:69574426..69698147	23411	SIRT1	0.080092
Iossifov2014:0005 Iossifov2014_EssentialGenes	int543:chr15:72097992..73161393	chr15:72908519..73050817	585	BBS4	0.080092
Iossifov2014:0005 Iossifov2014_EssentialGenes	int284:chr15:70428667..70434356	chr15:70320129..70460256	7090	TLE3	0.080092
Iossifov2014:0005 Iossifov2014_EssentialGenes	int916:chr17:42009211..42272586	chr17:42134120..42271014	10014	HDAC5	0.080092
Iossifov2014:0005 Iossifov2014_EssentialGenes	int172,int492:chr14:24662857..24721665	chr14:24571233..24669463	9985	REC8	0.080092
Iossifov2014:0005 Iossifov2014_EssentialGenes	int275,int488,int178,int78,int259,int715,int886,int432,int23,int598,int745,int325,int196:chr8:8088877..11886722	chr8:9343444..9659856	8658	TNKS	0.080092
Iossifov2014:0005 Iossifov2014_EssentialGenes	int637:chr11:2956783..3091788	chr11:2884447..2976995	1028	CDKN1C	0.080092
Iossifov2014:0005 Iossifov2014_EssentialGenes	int454:chr1:19093325..19100178	chr1:18887499..19095360	5081	PAX7	0.080092
Iossifov2014:0005 Iossifov2014_EssentialGenes	int917:chr21:40505513..40839630	chr21:40527371..40625440	8624	PSMG1	0.080092
Iossifov2014:0005 Iossifov2014_EssentialGenes	int804:chr10:11959691..12107640	chr10:11942020..12155169	26019	UPF2	0.080092
Iossifov2014:0004 Iossifov2014_Embryonic	int942:chr1:47687084..47997658	chr1:47695810..47849819	6491	STIL	0.0940906
Iossifov2014:0004 Iossifov2014_Embryonic	int804:chr10:11959691..12107640	chr10:12040915..12185227	55526	DHTKD1	0.0940906
Iossifov2014:0004 Iossifov2014_Embryonic	int688:chr22:36910391..36941780	chr22:36886896..36995277	8664	EIF3D	0.0940906
Iossifov2014:0004 Iossifov2014_Embryonic	int739:chr8:128675771..128679252	chr8:128678314..128773680	4609	MYC	0.0940906
Iossifov2014:0004 Iossifov2014_Embryonic	int995:chr6:149813940..150180259	chr6:149896010..150137708	11104,9113,348995	KATNA1,LATS1,NUP43	0.0940906
Iossifov2014:0004 Iossifov2014_Embryonic	int172,int492:chr14:24662857..24721665	chr14:24688850..24781880	26277	TINF2	0.0940906
Iossifov2014:0004 Iossifov2014_Embryonic	int905:chr5:136989278..137171477	chr5:137067072..137160039	10949	HNRNPA0	0.0940906
Iossifov2014:0004 Iossifov2014_Embryonic	int205:chr16:75152826..75211347	chr16:74962914..75226132	84937,162239	ZNRF1,ZFP1	0.0940906
Iossifov2014:0004 Iossifov2014_Embryonic	int360:chr12:110060137..110740470	chr12:110492139..110676600	28981	IFT81	0.0940906
Iossifov2014:0004 Iossifov2014_Embryonic	int275,int488,int178,int78,int259,int715,int886,int432,int23,int598,int745,int325,int196:chr8:8088877..11886722	chr8:8790313..8910849	90459	ERI1	0.0940906
Iossifov2014:0004 Iossifov2014_Embryonic	int875:chr1:54352928..54352928	chr1:54341998..54453841	115353	LRRC42	0.0940906
Iossifov2014:0004 Iossifov2014_Embryonic	int974:chr8:41723550..41935324	chr8:41766996..41979544	7994	KAT6A	0.0940906
Iossifov2014:0004 Iossifov2014_Embryonic	int51:chr1:77899667..78819970	chr1:78394086..78514889	8880	FUBP1	0.0940906
Iossifov2014:0004 Iossifov2014_Embryonic	int756:chr3:20191506..20373412	chr3:20182084..20297725	151648	SGOL1	0.0940906
Iossifov2014:0004 Iossifov2014_Embryonic	int206:chr12:53716133..53929672	chr12:53592082..53894946	9700,8086,5094	ESPL1,AAAS,PCBP2	0.0940906
Iossifov2014:0004 Iossifov2014_Embryonic	int343:chr1:231334780..231346779	chr1:231228673..231510773	440730,8443,83932	TRIM67,GNPAT,SPRTN	0.0940906
Iossifov2014:0004 Iossifov2014_Embryonic	int631,int222,int501:chr2:62905539..64334456	chr2:62830985..63293621	23301	EHBP1	0.0940906
Iossifov2014:0004 Iossifov2014_Embryonic	int358:chr1:192991783..193429853	chr1:192958551..193080906	6738	TROVE2	0.0940906
Iossifov2014:0004 Iossifov2014_Embryonic	int614,int260:chr1:158981187..159074762	chr1:159012274..159116647	9447	AIM2	0.0940906
Iossifov2014:0004 Iossifov2014_Embryonic	int388:chr1:114726064..114731913	chr1:114611913..114766472	148281	SYT6	0.0940906
Iossifov2014:0004 Iossifov2014_Embryonic	int29:chr6:89388023..89633046	chr6:89299615..89743348	8732	RNGTT	0.0940906
Iossifov2014:0004 Iossifov2014_Embryonic	int834,int232:chr10:97050555..97725111	chr10:97345685..97486567	5832	ALDH18A1	0.0940906
Iossifov2014:0004 Iossifov2014_Embryonic	int484:chr11:17938556..18162945	chr11:18081889..18197638	113174	SAAL1	0.0940906
Iossifov2014:0004 Iossifov2014_Embryonic	int199:chr12:108034827..108139363	chr12:108009589..108126257	11137	PWP1	0.0940906
Iossifov2014:0004 Iossifov2014_Embryonic	int51:chr1:77899667..78819970	chr1:78008100..78219112	26009	ZZZ3	0.0940906
Iossifov2014:0004 Iossifov2014_Embryonic	int299:chr13:98966784..99020971	chr13:98724815..99122027	10160	FARP1	0.0940906
Iossifov2014:0004 Iossifov2014_Embryonic	int172,int492:chr14:24662857..24721665	chr14:24571233..24669463	9985	REC8	0.0940906
Iossifov2014:0004 Iossifov2014_Embryonic	int387:chr9:101858054..101931740	chr9:101797370..101936473	7046	TGFBR1	0.0940906
Iossifov2014:0004 Iossifov2014_Embryonic	int215:chr6:113973847..114133862	chr6:114108513..114204652	4082	MARCKS	0.0940906
Iossifov2014:0004 Iossifov2014_Embryonic	int305:chr8:80582607..80582607	chr8:80453048..80598410	11075	STMN2	0.0940906
Iossifov2014:0004 Iossifov2014_Embryonic	int699:chr16:8968067..9079252	chr16:8926798..9032869	23589	CARHSP1	0.0940906
Iossifov2014:0004 Iossifov2014_Embryonic	int891:chr13:95036778..95082174	chr13:93809077..95080273	10082	GPC6	0.0940906
Iossifov2014:0004 Iossifov2014_Embryonic	int394,int794,int346,int87,int639:chr18:9478794..9988562	chr18:9526788..9684605	9989	PPP4R1	0.0940906
Iossifov2014:0004 Iossifov2014_Embryonic	int394,int794,int346,int87,int639:chr18:9478794..9988562	chr18:9843954..9980018	9218	VAPA	0.0940906
Iossifov2014:0004 Iossifov2014_Embryonic	int573:chr9:136664170..136678449	chr9:136607015..137003141	7410,8019	VAV2,BRD3	0.0940906
Iossifov2014:0004 Iossifov2014_Embryonic	int709:chr1:212882450..213004927	chr1:212961596..213184927	28982,79805	FLVCR1,VASH2	0.0940906
Iossifov2014:0004 Iossifov2014_Embryonic	int377:chr19:52838968..52883416	chr19:52730421..52890376	147657,162963	ZNF480,ZNF610	0.0940906
Iossifov2014:0004 Iossifov2014_Embryonic	int478:chr20:21056805..21246620	chr20:21213941..21390463	22803	XRN2	0.0940906
Iossifov2014:0004 Iossifov2014_Embryonic	int652,int424,int424,int85,int458:chr17:48396110..48647011	chr17:48380580..48478820	146956	EME1	0.0940906
Iossifov2014:0004 Iossifov2014_Embryonic	int543:chr15:72097992..73161393	chr15:72696666..72898896	25820	ARIH1	0.0940906
Iossifov2014:0004 Iossifov2014_Embryonic	int946:chr11:9964346..10331664	chr11:9780213..10385754	81846	SBF2	0.0940906
Iossifov2014:0004 Iossifov2014_Embryonic	int631,int222,int501:chr2:62905539..64334456	chr2:64299785..64441605	57162	PELI1	0.0940906
Iossifov2014:0004 Iossifov2014_Embryonic	int392:chr19:821102..830621	chr19:727391..832327	5725	PTBP1	0.0940906
Iossifov2014:0004 Iossifov2014_Embryonic	int147:chr15:85173872..85452820	chr15:85074248..85186947	54993	ZSCAN2	0.0940906
Iossifov2014:0004 Iossifov2014_Embryonic	int774:chr8:49888974..50369079	chr8:49810238..49903999	6591	SNAI2	0.0940906
Iossifov2014:0004 Iossifov2014_Embryonic	int275,int488,int178,int78,int259,int715,int886,int432,int23,int598,int745,int325,int196:chr8:8088877..11886722	chr8:9343444..9659856	8658	TNKS	0.0940906
Iossifov2014:0004 Iossifov2014_Embryonic	int193:chr2:61036023..61062412	chr2:60913364..61049221	64895	PAPOLG	0.0940906
Iossifov2014:0004 Iossifov2014_Embryonic	int683,int659:chr12:15368644..15669413	chr12:15405190..15771265	5800	PTPRO	0.0940906
Iossifov2014:0004 Iossifov2014_Embryonic	int590:chr18:55310072..55325982	chr18:55247893..55359177	4677	NARS	0.0940906
Iossifov2014:0004 Iossifov2014_Embryonic	int294:chr21:38458048..38598090	chr21:38375570..38595408	7267	TTC3	0.0940906
Iossifov2014:0004 Iossifov2014_Embryonic	int128,int398,int525,int610:chr7:148305430..148645341	chr7:148325932..148651441	8454,2146	CUL1,EZH2	0.0940906
Iossifov2014:0004 Iossifov2014_Embryonic	int200:chr19:11220410..11257018	chr19:11237830..11336484	147841	SPC24	0.0940906
Iossifov2014:0004 Iossifov2014_Embryonic	int73:chr19:7636751..7731619	chr19:7664410..7764439	56949	XAB2	0.0940906
Iossifov2014:0004 Iossifov2014_Embryonic	int642:chr22:36216155..36440240	chr22:36114782..36494585	23543	RBFOX2	0.0940906
Iossifov2014:0004 Iossifov2014_Embryonic	int352:chr2:166415099..166422010	chr2:166256156..166565917	80034	CSRNP3	0.0940906
Iossifov2014:0004 Iossifov2014_Embryonic	int654:chr3:172419276..172566275	chr3:172398474..172559264	1894	ECT2	0.0940906
Iossifov2014:0004 Iossifov2014_Embryonic	int183:chr3:47588649..48326433	chr3:47607377..47893405	6599	SMARCC1	0.0940906
Iossifov2014:0004 Iossifov2014_Embryonic	int954:chr2:27281034..27934711	chr2:27370257..27486660	790	CAD	0.0940906
Iossifov2014:0004 Iossifov2014_Embryonic	int647:chr6:7257272..7264849	chr6:7261375..7438270	6745,83732	SSR1,RIOK1	0.0940906
Iossifov2014:0004 Iossifov2014_Embryonic	int954:chr2:27281034..27934711	chr2:27528715..27702550	2976,5496	GTF3C2,PPM1G	0.0940906
Iossifov2014:0004 Iossifov2014_Embryonic	int345,int973:chr17:18662965..18831432	chr17:18689611..18854599	5636	PRPSAP2	0.0940906
Iossifov2014:0004 Iossifov2014_Embryonic	int185,int420:chr1:29186719..29593410	chr1:29143602..29578637	2035,6429	EPB41,SRSF4	0.0940906
Iossifov2014:0004 Iossifov2014_Embryonic	int376:chr9:14366507..14373886	chr9:14061841..14468982	4781	NFIB	0.0940906
Iossifov2014:0004 Iossifov2014_Embryonic	int15,int62,int95,int225:chr9:119138164..119529014	chr9:119379580..119483579	22954	TRIM32	0.0940906
Iossifov2014:0004 Iossifov2014_Embryonic	int106,int182,int348:chr10:103804114..104209407	chr10:103822750..103950210	23082,9221,8861	PPRC1,NOLC1,LDB1	0.0940906
Iossifov2014:0004 Iossifov2014_Embryonic	int870:chr22:46911745..46922134	chr22:46622637..47003067	51512,9620	GTSE1,CELSR1	0.0940906
Iossifov2014:0004 Iossifov2014_Embryonic	int436:chr22:20031102..20162758	chr22:19997754..20119400	54487	DGCR8	0.0940906
Iossifov2014:0004 Iossifov2014_Embryonic	int122,int331:chr1:184737999..184945900	chr1:184944550..185356461	6045,54823,10625	RNF2,SWT1,IVNS1ABP	0.0940906
Iossifov2014:0004 Iossifov2014_Embryonic	int106,int182,int348:chr10:103804114..104209407	chr10:104193718..104413214	51684,10121	SUFU,ACTR1A	0.0940906
Iossifov2014:0004 Iossifov2014_Embryonic	int437,int428,int5,int514:chr6:43082651..43396608	chr6:42985354..43091683	9820	CUL7	0.0940906
Iossifov2014:0004 Iossifov2014_Embryonic	int954:chr2:27281034..27934711	chr2:27204490..27313490	60509	AGBL5	0.0940906
Iossifov2014:0004 Iossifov2014_Embryonic	int183:chr3:47588649..48326433	chr3:48178667..48299801	993	CDC25A	0.0940906
Iossifov2014:0004 Iossifov2014_Embryonic	int527:chr1:182693381..182751046	chr1:182738438..182877117	1660	DHX9	0.0940906
Iossifov2014:0004 Iossifov2014_Embryonic	int284:chr15:70428667..70434356	chr15:70320129..70460256	7090	TLE3	0.0940906
Iossifov2014:0004 Iossifov2014_Embryonic	int233,int964:chr19:53743855..53780026	chr19:53718637..53828111	342926	ZNF677	0.0940906
Iossifov2014:0004 Iossifov2014_Embryonic	int987,int495:chr10:80878219..80972653	chr10:80758791..81096285	57178	ZMIZ1	0.0940906
Iossifov2014:0004 Iossifov2014_Embryonic	int861,int395:chr19:4856287..4872275	chr19:4833091..5173608	29128,23030	UHRF1,KDM4B	0.0940906
Iossifov2014:0004 Iossifov2014_Embryonic	int890:chr22:24194941..24204630	chr22:24059149..24196705	6598	SMARCB1	0.0940906
Iossifov2014:0004 Iossifov2014_Embryonic	int604:chr10:91057358..91185257	chr10:91104324..91200759	24138	IFIT5	0.0940906
Iossifov2014:0004 Iossifov2014_Embryonic	int724:chr17:1627704..1657899	chr17:1533922..1658176	10594	PRPF8	0.0940906
Iossifov2014:0004 Iossifov2014_Embryonic	int256:chr14:31347709..31353247	chr14:31343004..31565607	29966	STRN3	0.0940906
Iossifov2014:0004 Iossifov2014_Embryonic	int202:chr13:60130083..60406796	chr13:60219720..60808119	81624	DIAPH3	0.0940906
Iossifov2014:0004 Iossifov2014_Embryonic	int719:chr6:63808931..64539397	chr6:64211916..64445418	7803,23469	PTP4A1,PHF3	0.0940906
Iossifov2014:0004 Iossifov2014_Embryonic	int582,int347:chr10:97745894..97962767	chr10:97733158..97840625	54619	CCNJ	0.0940906
Iossifov2014:0004 Iossifov2014_Embryonic	int545:chr10:91369885..91593216	chr10:91391346..91554700	9585	KIF20B	0.0940906
Iossifov2014:0004 Iossifov2014_Embryonic	int123,int408,int72:chr16:2014130..2289455	chr16:2027989..2248130	7249,84231	TSC2,TRAF7	0.0940906
Iossifov2014:0004 Iossifov2014_Embryonic	int691,int59:chr10:68988231..69896336	chr10:69574426..69698147	23411	SIRT1	0.0940906
Iossifov2014:0004 Iossifov2014_Embryonic	int910:chr1:169356004..169460865	chr1:169413148..169525208	10560	SLC19A2	0.0940906
Iossifov2014:0004 Iossifov2014_Embryonic	int728:chr5:796047..824025	chr5:822968..938164	9319	TRIP13	0.0940906
Iossifov2014:0004 Iossifov2014_Embryonic	int618,int77:chr2:98998983..100146146	chr2:99996937..100829037	51455,3899	REV1,AFF3	0.0940906
Iossifov2014:0004 Iossifov2014_Embryonic	int996,int913:chr1:210939131..211643017	chr1:211362707..211509725	55758	RCOR3	0.0940906
Iossifov2014:0004 Iossifov2014_Embryonic	int935:chr19:56837099..56879488	chr19:56845382..56956400	147949	ZNF583	0.0940906
Iossifov2014:0004 Iossifov2014_Embryonic	int976:chr2:170274818..170578931	chr2:170520355..170628396	151230	KLHL23	0.0940906
Iossifov2014:0004 Iossifov2014_Embryonic	int923,int643:chr1:169651770..170054087	chr1:169802214..169933100	57147	SCYL3	0.0940906
Iossifov2014:0004 Iossifov2014_Embryonic	int954:chr2:27281034..27934711	chr2:27735835..27893713	84450,11321	ZNF512,GPN1	0.0940906
Iossifov2014:0004 Iossifov2014_Embryonic	int494:chr13:46514492..46658712	chr13:46516313..46696896	23091	ZC3H13	0.0940906
Iossifov2014:0004 Iossifov2014_Embryonic	int966,int414:chr2:206952515..207224602	chr2:206838444..207020906	54891	INO80D	0.0940906
Iossifov2014:0004 Iossifov2014_Embryonic	int640,int663:chr17:28733862..29738071	chr17:29088987..29242883	79915	ATAD5	0.0940906
Iossifov2014:0004 Iossifov2014_Embryonic	int979:chr10:26160650..26484154	chr10:26153001..26521465	53904	MYO3A	0.0940906
Iossifov2014:0004 Iossifov2014_Embryonic	int543:chr15:72097992..73161393	chr15:72513521..72633628	56965	PARP6	0.0940906
Iossifov2014:0004 Iossifov2014_Embryonic	int648:chr1:164765566..164943923	chr1:164458596..164841060	5087	PBX1	0.0940906
Iossifov2014:0004 Iossifov2014_Embryonic	int89:chr12:132417451..132571956	chr12:132364464..132585011	57634	EP400	0.0940906
Iossifov2014:0004 Iossifov2014_Embryonic	int796:chr3:28277894..28644307	chr3:28343843..28460618	64343	AZI2	0.0940906
Iossifov2014:0004 Iossifov2014_Embryonic	int589:chr17:43507403..44672951	chr17:44087281..44372740	284058	KANSL1	0.0940906
Iossifov2014:0004 Iossifov2014_Embryonic	int462:chr11:44106142..44285857	chr11:44047098..44286980	2132	EXT2	0.0940906
Iossifov2014:0004 Iossifov2014_Embryonic	int785:chr8:38014429..38316849	chr8:38100649..38309790	84513,54904	PLPP5,WHSC1L1	0.0940906
Iossifov2014:0004 Iossifov2014_Embryonic	int570,int466:chr3:155585172..156005151	chr3:155518324..155675520	8833	GMPS	0.0940906
Iossifov2014:0004 Iossifov2014_Embryonic	int163:chr8:66607219..66755163	chr8:66486887..66823969	9650,5150	MTFR1,PDE7A	0.0940906
Iossifov2014:0004 Iossifov2014_Embryonic	int479,int84:chr2:38947554..39173570	chr2:38950740..39173021	6432,90957	SRSF7,DHX57	0.0940906
Iossifov2014:0004 Iossifov2014_Embryonic	int113,int998:chr4:72510..498459	chr4:1..108099	152687	ZNF595	0.0940906
Iossifov2014:0004 Iossifov2014_Embryonic	int97:chr2:118368816..118873792	chr2:118502254..118609953	8886	DDX18	0.0940906
Iossifov2014:0004 Iossifov2014_Embryonic	int421:chr14:77062591..77167620	chr14:77158234..77269363	22846	VASH1	0.0940906
Iossifov2014:0004 Iossifov2014_Embryonic	int385:chr14:56521676..56591404	chr14:56515092..56788031	57161	PELI2	0.0940906
Iossifov2014:0004 Iossifov2014_Embryonic	int681:chr9:129954016..130076801	chr9:129552943..130005445	403341,9649	ZBTB34,RALGPS1	0.0940906
Iossifov2014:0004 Iossifov2014_Embryonic	int873:chr22:43167966..43182761	chr22:43172531..43323408	26286	ARFGAP3	0.0940906
Iossifov2014:0004 Iossifov2014_Embryonic	int487,int578:chr5:166984363..167900328	chr5:167843462..168076614	5917,79646	RARS,PANK3	0.0940906
Iossifov2014:0004 Iossifov2014_Embryonic	int524,int169,int177,int40:chr17:72839130..73534485	chr17:73111337..73220778	51155	HN1	0.0940906
Iossifov2014:0004 Iossifov2014_Embryonic	int622,int181:chr7:70071979..70257129	chr7:68993904..70278054	26053	AUTS2	0.0940906
Iossifov2014:0004 Iossifov2014_Embryonic	int113,int998:chr4:72510..498459	chr4:261595..387691	7700	ZNF141	0.0940906
Iossifov2014:0004 Iossifov2014_Embryonic	int468:chr2:233465847..233523617	chr2:233492014..233745289	26058	GIGYF2	0.0940906
Iossifov2014:0004 Iossifov2014_Embryonic	int21,int366:chr3:153587256..154132927	chr3:153973456..154112286	170506	DHX36	0.0940906
Iossifov2014:0004 Iossifov2014_Embryonic	int136:chr14:64229305..64474121	chr14:64249682..64713167	23224	SYNE2	0.0940906
Iossifov2014:0004 Iossifov2014_Embryonic	int609:chr5:75691606..75743907	chr5:75629079..76051605	10788,2149	IQGAP2,F2R	0.0940906
Iossifov2014:0004 Iossifov2014_Embryonic	int275,int488,int178,int78,int259,int715,int886,int432,int23,int598,int745,int325,int196:chr8:8088877..11886722	chr8:11583081..11716818	2222	FDFT1	0.0940906
Iossifov2014:0004 Iossifov2014_Embryonic	int374:chr12:33451588..34844133	chr12:34105215..34201236	84920	ALG10	0.0940906
Iossifov2014:0004 Iossifov2014_Embryonic	int857:chr19:48690847..48697961	chr19:48598701..48743860	3978	LIG1	0.0940906
Iossifov2014:0004 Iossifov2014_Embryonic	int425:chr15:23091857..23116232	chr15:22984683..23104427	81614	NIPA2	0.0940906
Iossifov2014:0004 Iossifov2014_Embryonic	int110,int650:chr1:43970956..44369444	chr1:44045796..44191189	9682	KDM4A	0.0940906
Iossifov2014:0004 Iossifov2014_Embryonic	int896:chr4:140664444..140676533	chr4:140617545..141145233	55534	MAML3	0.0940906
Iossifov2014:0004 Iossifov2014_Embryonic	int211:chr20:44779565..44813304	chr20:44669625..44788580	57727	NCOA5	0.0940906
Iossifov2014:0004 Iossifov2014_Embryonic	int449:chr3:107823224..108545856	chr3:108248717..108378491	57650	KIAA1524	0.0940906
Iossifov2014:0004 Iossifov2014_Embryonic	int122,int331:chr1:184737999..184945900	chr1:184639624..184794041	80267	EDEM3	0.0940906
Sugathan2014:0001 Sugathan2014_CHD8BindingPartner	int406:chr3:121342819..121727963	chr3:121362045..121538614	2804	GOLGB1	0.127687
Sugathan2014:0001 Sugathan2014_CHD8BindingPartner	int155:chr7:127263886..127788296	chr7:127647123..127741002	64101	LRRC4	0.127687
Sugathan2014:0001 Sugathan2014_CHD8BindingPartner	int972:chr20:18058000..18104554	chr20:18048498..18189031	100303755,57325	PET117,CSRP2BP	0.127687
Sugathan2014:0001 Sugathan2014_CHD8BindingPartner	int781:chr1:46615056..46892812	chr1:46485811..46850824	8503,7388,387338	PIK3R3,UQCRH,NSUN4	0.127687
Sugathan2014:0001 Sugathan2014_CHD8BindingPartner	int528:chr2:230618034..230870007	chr2:230608552..230856725	9320	TRIP12	0.127687
Sugathan2014:0001 Sugathan2014_CHD8BindingPartner	int543:chr15:72097992..73161393	chr15:72615777..72898896	3073,25820	HEXA,ARIH1	0.127687
Sugathan2014:0001 Sugathan2014_CHD8BindingPartner	int105:chr16:51163406..51211595	chr16:51149885..51255183	6299	SALL1	0.127687
Sugathan2014:0001 Sugathan2014_CHD8BindingPartner	int796:chr3:28277894..28644307	chr3:28213123..28460618	152100,64343	CMC1,AZI2	0.127687
Sugathan2014:0001 Sugathan2014_CHD8BindingPartner	int910:chr1:169356004..169460865	chr1:169081767..169407201	29922,8548	NME7,BLZF1	0.127687
Sugathan2014:0001 Sugathan2014_CHD8BindingPartner	int771:chr1:156403681..156474119	chr1:156413512..156540634	4209	MEF2D	0.127687
Sugathan2014:0001 Sugathan2014_CHD8BindingPartner	int494:chr13:46514492..46658712	chr13:46516313..46696896	23091	ZC3H13	0.127687
Sugathan2014:0001 Sugathan2014_CHD8BindingPartner	int822:chr2:72395464..73084166	chr2:72386443..73123177	23233	EXOC6B	0.127687
Sugathan2014:0001 Sugathan2014_CHD8BindingPartner	int436:chr22:20031102..20162758	chr22:19997754..20174818	54487,5902,27037	DGCR8,RANBP1,TRMT2A	0.127687
Sugathan2014:0001 Sugathan2014_CHD8BindingPartner	int17:chr20:5029207..5042089	chr20:5037406..5198533	8760,5111	CDS2,PCNA	0.127687
Sugathan2014:0001 Sugathan2014_CHD8BindingPartner	int183:chr3:47588649..48326433	chr3:47607377..47911686	6599,22907	SMARCC1,DHX30	0.127687
Sugathan2014:0001 Sugathan2014_CHD8BindingPartner	int508:chr4:105967687..106034949	chr4:105997031..106220960	54790	TET2	0.127687
Sugathan2014:0001 Sugathan2014_CHD8BindingPartner	int923,int643:chr1:169651770..170054087	chr1:169741669..169933100	92342,57147	METTL18,SCYL3	0.127687
Sugathan2014:0001 Sugathan2014_CHD8BindingPartner	int123,int408,int72:chr16:2014130..2289455	chr16:1952063..2167867	10607,6187,7249,4913	TBL3,RPS2,TSC2,NTHL1	0.127687
Sugathan2014:0001 Sugathan2014_CHD8BindingPartner	int485:chr14:77496619..77532343	chr14:77470885..77565042	64207	IRF2BPL	0.127687
Sugathan2014:0001 Sugathan2014_CHD8BindingPartner	int345,int973:chr17:18662965..18831432	chr17:18689611..18854599	5636	PRPSAP2	0.127687
Sugathan2014:0001 Sugathan2014_CHD8BindingPartner	int977:chr13:74674871..74841329	chr13:74240148..74778066	11278	KLF12	0.127687
Sugathan2014:0001 Sugathan2014_CHD8BindingPartner	int251:chr18:20897698..21368907	chr18:20855978..21087925	85019	TMEM241	0.127687
Sugathan2014:0001 Sugathan2014_CHD8BindingPartner	int244:chr15:35341836..35395583	chr15:35128551..35350497	9716,54989	AQR,ZNF770	0.127687
Sugathan2014:0001 Sugathan2014_CHD8BindingPartner	int939:chr6:109279211..109468770	chr6:109287639..109485708	27244	SESN1	0.127687
Sugathan2014:0001 Sugathan2014_CHD8BindingPartner	int975:chr16:89106321..89132011	chr16:89090216..89653237	197322,197320,29123,6687,6137	ACSF3,ZNF778,ANKRD11,SPG7,RPL13	0.127687
Sugathan2014:0001 Sugathan2014_CHD8BindingPartner	int41:chr1:236899343..236938860	chr1:236888580..237087281	4548	MTR	0.127687
Sugathan2014:0001 Sugathan2014_CHD8BindingPartner	int113,int998:chr4:72510..498459	chr4:1..177949	255403	ZNF718	0.127687
Sugathan2014:0001 Sugathan2014_CHD8BindingPartner	int137:chr7:72022225..72417063	chr7:72019491..72441979	441250,9883	TYW1B,POM121	0.127687
Sugathan2014:0001 Sugathan2014_CHD8BindingPartner	int793:chr6:89790564..89867561	chr6:89720428..89895288	10957,135293	PNRC1,PM20D2	0.127687
Sugathan2014:0001 Sugathan2014_CHD8BindingPartner	int164:chr1:82220276..82539588	chr1:82095454..82478422	23266	ADGRL2	0.127687
Sugathan2014:0001 Sugathan2014_CHD8BindingPartner	int995:chr6:149813940..150180259	chr6:149959288..150152557	9113,5110,348995	LATS1,PCMT1,NUP43	0.127687
Sugathan2014:0001 Sugathan2014_CHD8BindingPartner	int720:chr10:54072560..54116232	chr10:54004040..54097417	22943	DKK1	0.127687
Sugathan2014:0001 Sugathan2014_CHD8BindingPartner	int890:chr22:24194941..24204630	chr22:24045005..24196705	4320,6598,400916	MMP11,SMARCB1,CHCHD10	0.127687
Sugathan2014:0001 Sugathan2014_CHD8BindingPartner	int383:chr7:104524092..105087973	chr7:104584636..105099377	55904,6733	KMT2E,SRPK2	0.127687
Sugathan2014:0001 Sugathan2014_CHD8BindingPartner	int575:chr11:68588176..68796746	chr11:68601318..68741303	3508,219927	IGHMBP2,MRPL21	0.127687
Sugathan2014:0001 Sugathan2014_CHD8BindingPartner	int651:chr18:43617872..43716475	chr18:43407573..43754199	57724,115106,498	EPG5,HAUS1,ATP5A1	0.127687
Sugathan2014:0001 Sugathan2014_CHD8BindingPartner	int484:chr11:17938556..18162945	chr11:18081889..18197638	113174	SAAL1	0.127687
Sugathan2014:0001 Sugathan2014_CHD8BindingPartner	int813:chr19:14792529..14864228	chr19:14570378..14864558	9524,3337,4713,84449	TECR,DNAJB1,NDUFB7,ZNF333	0.127687
Sugathan2014:0001 Sugathan2014_CHD8BindingPartner	int652,int424,int424,int85,int458:chr17:48396110..48647011	chr17:48380580..48583341	146956,51264,55316	EME1,MRPL27,RSAD1	0.127687
Sugathan2014:0001 Sugathan2014_CHD8BindingPartner	int110,int650:chr1:43970956..44369444	chr1:44045796..44191189	9682	KDM4A	0.127687
Sugathan2014:0001 Sugathan2014_CHD8BindingPartner	int242:chr5:170284624..170694033	chr5:170218885..170857888	64901,4869	RANBP17,NPM1	0.127687
Sugathan2014:0001 Sugathan2014_CHD8BindingPartner	int738:chr17:2400876..2410593	chr17:1863430..2608909	1801,124641,3090,23293,63826,9905,55720,4335,79066,5048	DPH1,OVCA2,HIC1,SMG6,SRR,SGSM2,TSR1,MNT,METTL16,PAFAH1B1	0.127687
Sugathan2014:0001 Sugathan2014_CHD8BindingPartner	int147:chr15:85173872..85452820	chr15:85074248..85369663	54993,4828,23478,9640	ZSCAN2,NMB,SEC11A,ZNF592	0.127687
Sugathan2014:0001 Sugathan2014_CHD8BindingPartner	int584,int866,int491:chr17:55547695..55777985	chr17:55263930..55777299	124540	MSI2	0.127687
Sugathan2014:0001 Sugathan2014_CHD8BindingPartner	int399:chr8:19987914..19987914	chr8:19984703..20099207	526	ATP6V1B2	0.127687
Sugathan2014:0001 Sugathan2014_CHD8BindingPartner	int996,int913:chr1:210939131..211643017	chr1:211362707..211509725	55758	RCOR3	0.127687
Sugathan2014:0001 Sugathan2014_CHD8BindingPartner	int648:chr1:164765566..164943923	chr1:164458596..164841060	5087	PBX1	0.127687
Sugathan2014:0001 Sugathan2014_CHD8BindingPartner	int275,int488,int178,int78,int259,int715,int886,int432,int23,int598,int745,int325,int196:chr8:8088877..11886722	chr8:10733656..11205654	286046,66036	XKR6,MTMR9	0.127687
Sugathan2014:0001 Sugathan2014_CHD8BindingPartner	int724:chr17:1627704..1657899	chr17:1452547..1658176	124935,10594	SLC43A2,PRPF8	0.127687
Sugathan2014:0001 Sugathan2014_CHD8BindingPartner	int21,int366:chr3:153587256..154132927	chr3:153973456..154112286	170506	DHX36	0.127687
Sugathan2014:0001 Sugathan2014_CHD8BindingPartner	int108,int353:chr19:49451217..49659014	chr19:49388116..49674287	581,2512,10856,2997,6625,8541	BAX,FTL,RUVBL2,GYS1,SNRNP70,PPFIA3	0.127687
Sugathan2014:0001 Sugathan2014_CHD8BindingPartner	int582,int347:chr10:97745894..97962767	chr10:97733158..97943517	54619,9849	CCNJ,ZNF518A	0.127687
Sugathan2014:0001 Sugathan2014_CHD8BindingPartner	int833:chr8:82689212..82873063	chr8:82691817..82824521	64089	SNX16	0.127687
Sugathan2014:0001 Sugathan2014_CHD8BindingPartner	int400:chr2:3313428..3381189	chr2:3313445..3503342	51112	TRAPPC12	0.127687
Sugathan2014:0001 Sugathan2014_CHD8BindingPartner	int113,int998:chr4:72510..498459	chr4:261595..387691	7700	ZNF141	0.127687
Sugathan2014:0001 Sugathan2014_CHD8BindingPartner	int200:chr19:11220410..11257018	chr19:10922742..11749974	11018,6597,78992,3949,147841,57572,374882,2057,5589,1995,51295,199692	TMED1,SMARCA4,YIPF2,LDLR,SPC24,DOCK6,TMEM205,EPOR,PRKCSH,ELAVL3,ECSIT,ZNF627	0.127687
Sugathan2014:0001 Sugathan2014_CHD8BindingPartner	int161:chr8:97529682..97543956	chr8:97435881..97644037	6383	SDC2	0.127687
Sugathan2014:0001 Sugathan2014_CHD8BindingPartner	int369,int465,int874:chr6:143919229..144207531	chr6:143859316..144172322	9749	PHACTR2	0.127687
Sugathan2014:0001 Sugathan2014_CHD8BindingPartner	int97:chr2:118368816..118873792	chr2:118502254..118609953	8886	DDX18	0.127687
Sugathan2014:0001 Sugathan2014_CHD8BindingPartner	int114:chr14:92544769..92639767	chr14:92414242..92658153	9321,4287,53981,4707	TRIP11,ATXN3,CPSF2,NDUFB1	0.127687
Sugathan2014:0001 Sugathan2014_CHD8BindingPartner	int374:chr12:33451588..34844133	chr12:34105215..34201236	84920	ALG10	0.127687
Sugathan2014:0001 Sugathan2014_CHD8BindingPartner	int427:chr5:176998497..177106718	chr5:176957118..177057346	11285	B4GALT7	0.127687
Sugathan2014:0001 Sugathan2014_CHD8BindingPartner	int90:chr7:73877809..73987405	chr7:73798119..74195022	9569,2969	GTF2IRD1,GTF2I	0.127687
Sugathan2014:0001 Sugathan2014_CHD8BindingPartner	int699:chr16:8968067..9079252	chr16:8821669..9127341	5373,25880,23589,7874	PMM2,TMEM186,CARHSP1,USP7	0.127687
Sugathan2014:0001 Sugathan2014_CHD8BindingPartner	int449:chr3:107823224..108545856	chr3:108238336..108433693	9666,57650	DZIP3,KIAA1524	0.127687
Sugathan2014:0001 Sugathan2014_CHD8BindingPartner	int986:chr4:146748044..146821410	chr4:146658778..146930112	152485	ZNF827	0.127687
Sugathan2014:0001 Sugathan2014_CHD8BindingPartner	int377:chr19:52838968..52883416	chr19:52354550..53110427	84765,79898,65251,59348,284370,80110,9668,284371,90317,5518,90321,162963,400713,147660,55762	ZNF577,ZNF613,ZNF649,ZNF350,ZNF615,ZNF614,ZNF432,ZNF841,ZNF616,PPP2R1A,ZNF766,ZNF610,ZNF880,ZNF578,ZNF701	0.127687
Sugathan2014:0001 Sugathan2014_CHD8BindingPartner	int625,int729:chr8:109067078..109588327	chr8:109193971..109330959	3646	EIF3E	0.127687
Sugathan2014:0001 Sugathan2014_CHD8BindingPartner	int474:chr2:222225453..222272013	chr2:222262746..222508922	2043	EPHA4	0.127687
Sugathan2014:0001 Sugathan2014_CHD8BindingPartner	int270:chr15:57244382..57244382	chr15:57140832..57600730	6938	TCF12	0.127687
Sugathan2014:0001 Sugathan2014_CHD8BindingPartner	int743:chr8:27475767..27564846	chr8:27562057..27765612	157570,55872	ESCO2,PBK	0.127687
Sugathan2014:0001 Sugathan2014_CHD8BindingPartner	int831,int240,int846:chr5:16762024..16827737	chr5:16642015..17006385	4651	MYO10	0.127687
Sugathan2014:0001 Sugathan2014_CHD8BindingPartner	int51:chr1:77899667..78819970	chr1:78008100..78365225	26009,23032,374986	ZZZ3,USP33,FAM73A	0.127687
Sugathan2014:0001 Sugathan2014_CHD8BindingPartner	int586:chr17:71174027..71255954	chr17:71119172..71224645	9382	COG1	0.127687
Sugathan2014:0001 Sugathan2014_CHD8BindingPartner	int206:chr12:53716133..53929672	chr12:53504534..53894946	283337,51380,84975,5204,60314,8086,6667,5094	ZNF740,CSAD,MFSD5,PFDN5,C12ORF10,AAAS,SP1,PCBP2	0.127687
Sugathan2014:0001 Sugathan2014_CHD8BindingPartner	int560:chr12:56455524..56462323	chr12:56039817..56685753	2647,5959,10220,967,29095,85406,1606,84305,1017,6490,6231,6171,84872,140465,6601,10193,93058	BLOC1S1,RDH5,GDF11,CD63,ORMDL2,DNAJC14,DGKA,PYM1,CDK2,PMEL,RPS26,RPL41,ZC3H10,MYL6B,SMARCC2,RNF41,COQ10A	0.127687
Sugathan2014:0001 Sugathan2014_CHD8BindingPartner	int753:chr8:38622060..38622060	chr8:38515703..38730546	6867	TACC1	0.127687
Sugathan2014:0001 Sugathan2014_CHD8BindingPartner	int631,int222,int501:chr2:62905539..64334456	chr2:63998097..64316214	7360,51542	UGP2,VPS54	0.127687
Sugathan2014:0001 Sugathan2014_CHD8BindingPartner	int548:chr3:134113349..134341297	chr3:134054186..134313855	51421,80254,25847	AMOTL2,CEP63,ANAPC13	0.127687
Sugathan2014:0001 Sugathan2014_CHD8BindingPartner	int954:chr2:27281034..27934711	chr2:27204490..27313490	60509	AGBL5	0.127687
Sugathan2014:0001 Sugathan2014_CHD8BindingPartner	int829:chr6:38338015..38342083	chr6:38116226..38740952	114781,2739	BTBD9,GLO1	0.127687
Sugathan2014:0001 Sugathan2014_CHD8BindingPartner	int618,int77:chr2:98998983..100146146	chr2:99155041..99294981	25972,493753	UNC50,COA5	0.127687
Sugathan2014:0001 Sugathan2014_CHD8BindingPartner	int654:chr3:172419276..172566275	chr3:172398474..172559264	1894	ECT2	0.127687
Sugathan2014:0001 Sugathan2014_CHD8BindingPartner	int163:chr8:66607219..66755163	chr8:66494690..66823969	55156,5150	ARMC1,PDE7A	0.127687
Sugathan2014:0001 Sugathan2014_CHD8BindingPartner	int392:chr19:821102..830621	chr19:627525..832327	55658,5725	RNF126,PTBP1	0.127687
Sugathan2014:0001 Sugathan2014_CHD8BindingPartner	int1:chr8:119093994..119128220	chr8:118791601..119194058	2131	EXT1	0.127687
Sugathan2014:0001 Sugathan2014_CHD8BindingPartner	int579:chr17:60743806..60752388	chr17:60486385..60790962	11011,9902	TLK2,MRC2	0.127687
Sugathan2014:0001 Sugathan2014_CHD8BindingPartner	int19:chr9:23735995..23849297	chr9:23670102..23896063	1993	ELAVL2	0.127687
Sugathan2014:0001 Sugathan2014_CHD8BindingPartner	int277:chr2:208542914..208560343	chr2:208324615..208560055	1385,151194	CREB1,METTL21A	0.127687
Sugathan2014:0001 Sugathan2014_CHD8BindingPartner	int66:chr5:133294384..133416974	chr5:133287565..133410824	7416	VDAC1	0.127687
Sugathan2014:0001 Sugathan2014_CHD8BindingPartner	int202:chr13:60130083..60406796	chr13:60219720..60808119	81624	DIAPH3	0.127687
Sugathan2014:0001 Sugathan2014_CHD8BindingPartner	int687,int103:chr2:119223974..119631981	chr2:119579746..119675759	2019	EN1	0.127687
Sugathan2014:0001 Sugathan2014_CHD8BindingPartner	int343:chr1:231334780..231346779	chr1:231306918..231433719	8443	GNPAT	0.127687
Sugathan2014:0001 Sugathan2014_CHD8BindingPartner	int954:chr2:27281034..27934711	chr2:27370257..27505175	790,8884	CAD,SLC5A6	0.127687
Sugathan2014:0001 Sugathan2014_CHD8BindingPartner	int809:chr12:52268138..52334814	chr12:52275450..52491279	91,60673	ACVR1B,ATG101	0.127687
Sugathan2014:0001 Sugathan2014_CHD8BindingPartner	int879:chr3:149255800..149293316	chr3:149215021..149758741	25937,51122,11342,5217	WWTR1,COMMD2,RNF13,PFN2	0.127687
Sugathan2014:0001 Sugathan2014_CHD8BindingPartner	int590:chr18:55310072..55325982	chr18:55247893..55359177	4677	NARS	0.127687
Sugathan2014:0001 Sugathan2014_CHD8BindingPartner	int437,int428,int5,int514:chr6:43082651..43396608	chr6:43069032..43169244	6722	SRF	0.127687
Sugathan2014:0001 Sugathan2014_CHD8BindingPartner	int927:chr8:23441600..23472541	chr8:23266664..23450063	9583,51312	ENTPD4,SLC25A37	0.127687
Sugathan2014:0001 Sugathan2014_CHD8BindingPartner	int954:chr2:27281034..27934711	chr2:27512359..27685124	4358,9784,2976,8890,130557,29959	MPV17,SNX17,GTF3C2,EIF2B4,ZNF513,NRBP1	0.127687
Sugathan2014:0001 Sugathan2014_CHD8BindingPartner	int995:chr6:149813940..150180259	chr6:149805630..149937238	85313	PPIL4	0.127687
Sugathan2014:0001 Sugathan2014_CHD8BindingPartner	int128,int398,int525,int610:chr7:148305430..148645341	chr7:148325932..148651441	8454,2146	CUL1,EZH2	0.127687
Sugathan2014:0001 Sugathan2014_CHD8BindingPartner	int88,int679:chr7:70497737..70614846	chr7:70527522..71198586	64409	WBSCR17	0.127687
Sugathan2014:0001 Sugathan2014_CHD8BindingPartner	int552:chr15:75960767..76088345	chr15:76065626..76247608	92912,26263	UBE2Q2,FBXO22	0.127687
Sugathan2014:0001 Sugathan2014_CHD8BindingPartner	int626,int826:chr8:72179780..72239230	chr8:72089667..72344467	2138	EYA1	0.127687
Sugathan2014:0001 Sugathan2014_CHD8BindingPartner	int657:chr6:44852734..45396544	chr6:44774466..45415788	8464	SUPT3H	0.127687
Sugathan2014:0001 Sugathan2014_CHD8BindingPartner	int275,int488,int178,int78,int259,int715,int886,int432,int23,int598,int745,int325,int196:chr8:8088877..11886722	chr8:8790313..8910849	90459	ERI1	0.127687
Sugathan2014:0001 Sugathan2014_CHD8BindingPartner	int89:chr12:132417451..132571956	chr12:132364464..132585011	57634	EP400	0.127687
Sugathan2014:0001 Sugathan2014_CHD8BindingPartner	int631,int222,int501:chr2:62905539..64334456	chr2:63328534..63885867	51057,4190	WDPCP,MDH1	0.127687
Sugathan2014:0001 Sugathan2014_CHD8BindingPartner	int857:chr19:48690847..48697961	chr19:48691342..49005571	22900,163071,2906,10945,83743,9266	CARD8,ZNF114,GRIN2D,KDELR1,GRWD1,CYTH2	0.127687
Sugathan2014:0001 Sugathan2014_CHD8BindingPartner	int91,int574:chr11:35561328..35811024	chr11:35614299..35852603	54765	TRIM44	0.127687
Sugathan2014:0001 Sugathan2014_CHD8BindingPartner	int990:chr2:202613635..202666254	chr2:202464906..202715895	65062,57679	TMEM237,ALS2	0.127687
Sugathan2014:0001 Sugathan2014_CHD8BindingPartner	int785:chr8:38014429..38316849	chr8:37964105..38309790	9530,27257,23259,54904,137994	BAG4,LSM1,DDHD2,WHSC1L1,LETM2	0.127687
Sugathan2014:0001 Sugathan2014_CHD8BindingPartner	int647:chr6:7257272..7264849	chr6:7037829..7272213	6239	RREB1	0.127687
Sugathan2014:0001 Sugathan2014_CHD8BindingPartner	int658:chr2:208925719..208957750	chr2:208666011..208960284	389072	PLEKHM3	0.127687
Sugathan2014:0001 Sugathan2014_CHD8BindingPartner	int891:chr13:95036778..95082174	chr13:93809077..95080273	10082	GPC6	0.127687
Sugathan2014:0001 Sugathan2014_CHD8BindingPartner	int917:chr21:40505513..40839630	chr21:40537403..40791047	54014,3150	BRWD1,HMGN1	0.127687
Sugathan2014:0001 Sugathan2014_CHD8BindingPartner	int329:chr19:39475140..39545986	chr19:39307027..39491536	3191,4793,22933,6183,54938	HNRNPL,NFKBIB,SIRT2,MRPS12,SARS2	0.127687
Sugathan2014:0001 Sugathan2014_CHD8BindingPartner	int756:chr3:20191506..20373412	chr3:19918571..20297725	5868,8850,151648	RAB5A,KAT2B,SGOL1	0.127687
Sugathan2014:0001 Sugathan2014_CHD8BindingPartner	int640,int663:chr17:28733862..29738071	chr17:29351944..29724695	4763	NF1	0.127687
Sugathan2014:0001 Sugathan2014_CHD8BindingPartner	int183:chr3:47588649..48326433	chr3:48313806..48413175	10201	NME6	0.127687
Sugathan2014:0001 Sugathan2014_CHD8BindingPartner	int674:chr3:171852737..171857014	chr3:171687417..172138492	64778	FNDC3B	0.127687
Sugathan2014:0001 Sugathan2014_CHD8BindingPartner	int640,int663:chr17:28733862..29738071	chr17:29088987..29303286	79915,79736	ATAD5,TEFM	0.127687
Sugathan2014:0001 Sugathan2014_CHD8BindingPartner	int447,int959:chr8:102749568..103193781	chr8:102678769..103207135	83988	NCALD	0.127687
Sugathan2014:0001 Sugathan2014_CHD8BindingPartner	int563,int591:chr17:64251733..64534580	chr17:63504682..64258249	8313,201134	AXIN2,CEP112	0.127687
Sugathan2014:0001 Sugathan2014_CHD8BindingPartner	int675:chr5:125882825..125882825	chr5:125857532..126001082	501,51808	ALDH7A1,PHAX	0.127687
Sugathan2014:0001 Sugathan2014_CHD8BindingPartner	int275,int488,int178,int78,int259,int715,int886,int432,int23,int598,int745,int325,int196:chr8:8088877..11886722	chr8:9343444..9659856	8658	TNKS	0.127687
Sugathan2014:0001 Sugathan2014_CHD8BindingPartner	int145:chr5:126546576..126631791	chr5:126556455..126910780	84466,133619	MEGF10,PRRC1	0.127687
Sugathan2014:0001 Sugathan2014_CHD8BindingPartner	int265:chr5:130655526..131539255	chr5:130436606..131040929	90624,3094,56990,51735	LYRM7,HINT1,CDC42SE2,RAPGEF6	0.127687
Sugathan2014:0001 Sugathan2014_CHD8BindingPartner	int589:chr17:43507403..44672951	chr17:44356912..44509134	100506084	ARL17B	0.127687
Sugathan2014:0001 Sugathan2014_CHD8BindingPartner	int194:chr14:68970211..69010925	chr14:68123518..69082738	51109,23503,5890	RDH11,ZFYVE26,RAD51B	0.127687
Sugathan2014:0001 Sugathan2014_CHD8BindingPartner	int515,int566,int293,int133,int863,int342:chr2:239997710..240327863	chr2:239949863..240392643	9759	HDAC4	0.127687
Sugathan2014:0001 Sugathan2014_CHD8BindingPartner	int719:chr6:63808931..64539397	chr6:64211916..64445418	7803,23469	PTP4A1,PHF3	0.127687
Sugathan2014:0001 Sugathan2014_CHD8BindingPartner	int51:chr1:77899667..78819970	chr1:78394086..78514889	8880	FUBP1	0.127687
Sugathan2014:0001 Sugathan2014_CHD8BindingPartner	int585:chr6:69130024..69782518	chr6:69275631..70119403	577	ADGRB3	0.127687
Sugathan2014:0001 Sugathan2014_CHD8BindingPartner	int412:chr12:8851557..8971968	chr12:8780495..8949787	57494	RIMKLB	0.127687
Sugathan2014:0001 Sugathan2014_CHD8BindingPartner	int611,int483:chr15:90580008..90756292	chr15:90738894..90835443	51335	NGRN	0.127687
Sugathan2014:0001 Sugathan2014_CHD8BindingPartner	int621,int453:chr2:206050355..206495505	chr2:205340515..206504886	117583	PARD3B	0.127687
Sugathan2014:0001 Sugathan2014_CHD8BindingPartner	int887:chr1:225935369..225963665	chr1:225654533..225998168	55740,6726	ENAH,SRP9	0.127687
Sugathan2014:0001 Sugathan2014_CHD8BindingPartner	int185,int420:chr1:29186719..29593410	chr1:29454249..29578637	6429	SRSF4	0.127687
Sugathan2014:0001 Sugathan2014_CHD8BindingPartner	int618,int77:chr2:98998983..100146146	chr2:99883833..100176480	9669,10190,51455	EIF5B,TXNDC9,REV1	0.127687
Sugathan2014:0001 Sugathan2014_CHD8BindingPartner	int835,int632:chr3:143499552..143872124	chr3:143620639..143731210	205428	C3ORF58	0.127687
Sugathan2014:0001 Sugathan2014_CHD8BindingPartner	int864:chr1:28244854..28290746	chr1:28087251..28311308	5511,6118	PPP1R8,RPA2	0.127687
Sugathan2014:0001 Sugathan2014_CHD8BindingPartner	int691,int59:chr10:68988231..69896336	chr10:69574426..69698147	23411	SIRT1	0.127687
Sugathan2014:0001 Sugathan2014_CHD8BindingPartner	int193:chr2:61036023..61062412	chr2:60913364..61315365	64895,5966,150962,5194	PAPOLG,REL,PUS10,PEX13	0.127687
Sugathan2014:0001 Sugathan2014_CHD8BindingPartner	int437,int428,int5,int514:chr6:43082651..43396608	chr6:43325291..43554728	89845,93643,9533,25844	ABCC10,TJAP1,POLR1C,YIPF3	0.127687
Sugathan2014:0001 Sugathan2014_CHD8BindingPartner	int479,int84:chr2:38947554..39173570	chr2:38950740..39048636	6432	SRSF7	0.127687
Sugathan2014:0001 Sugathan2014_CHD8BindingPartner	int872:chr3:65307541..65327414	chr3:65319905..66094509	9223	MAGI1	0.127687
Sugathan2014:0001 Sugathan2014_CHD8BindingPartner	int954:chr2:27281034..27934711	chr2:27735835..28581767	84450,11321,22950,9913,9553,64080,9577	ZNF512,GPN1,SLC4A1AP,SUPT7L,MRPL33,RBKS,BRE	0.127687
Sugathan2014:0001 Sugathan2014_CHD8BindingPartner	int256:chr14:31347709..31353247	chr14:31343004..31959788	29966,11154,25831,25938	STRN3,AP4S1,HECTD1,HEATR5A	0.127687
Sugathan2014:0001 Sugathan2014_CHD8BindingPartner	int341,int67,int535:chr10:61562977..61808880	chr10:61390521..61736414	220963,8030	SLC16A9,CCDC6	0.127687
Sugathan2014:0001 Sugathan2014_CHD8BindingPartner	int188,int50:chr19:30237263..30328851	chr19:30169792..30276696	83636	C19ORF12	0.127687
Sugathan2014:0001 Sugathan2014_CHD8BindingPartner	int434,int464:chr14:23020706..23082027	chr14:23013806..23128143	1603	DAD1	0.127687
Sugathan2014:0001 Sugathan2014_CHD8BindingPartner	int326:chr15:78563735..78563735	chr15:78555577..78861563	80349,3658,5685	WDR61,IREB2,PSMA4	0.127687
Sugathan2014:0001 Sugathan2014_CHD8BindingPartner	int568:chr7:114337652..114387041	chr7:113985051..114353827	93986	FOXP2	0.127687
Sugathan2014:0001 Sugathan2014_CHD8BindingPartner	int122,int331:chr1:184737999..184945900	chr1:184944550..185196230	6045,81627	RNF2,TRMT1L	0.127687
Sugathan2014:0001 Sugathan2014_CHD8BindingPartner	int688:chr22:36910391..36941780	chr22:36843092..36995277	25828,8664	TXN2,EIF3D	0.127687
Sugathan2014:0001 Sugathan2014_CHD8BindingPartner	int16,int7,int220:chr7:132938039..133542099	chr7:132867822..133770513	60412	EXOC4	0.127687
Sugathan2014:0001 Sugathan2014_CHD8BindingPartner	int926:chr1:156647931..156655253	chr1:156544099..156792240	54865,10763,51093,1382,5546,81875,79590,3068	GPATCH4,NES,RRNAD1,CRABP2,PRCC,ISG20L2,MRPL24,HDGF	0.127687
Sugathan2014:0001 Sugathan2014_CHD8BindingPartner	int731:chr3:141660166..141879926	chr3:141525469..141938386	483,7029	ATP1B3,TFDP2	0.127687
Sugathan2014:0001 Sugathan2014_CHD8BindingPartner	int797:chr2:160325291..160465641	chr2:159755145..160645094	85461,151525,29994,64844	TANC1,WDSUB1,BAZ2B,MARCH7	0.127687
Sugathan2014:0001 Sugathan2014_CHD8BindingPartner	int572:chr1:64940492..64998457	chr1:64866475..65178741	57685	CACHD1	0.127687
Sugathan2014:0001 Sugathan2014_CHD8BindingPartner	int875:chr1:54352928..54352928	chr1:54297391..54425487	54432	YIPF1	0.127687
Sugathan2014:0001 Sugathan2014_CHD8BindingPartner	int951:chr12:27861268..27957674	chr12:27607044..27929237	8496,60488	PPFIBP1,MRPS35	0.127687
Sugathan2014:0001 Sugathan2014_CHD8BindingPartner	int615:chr7:63757160..64210052	chr7:63704250..63837012	728927	ZNF736	0.127687
Sugathan2014:0001 Sugathan2014_CHD8BindingPartner	int640,int663:chr17:28733862..29738071	chr17:28734425..28873832	9527	GOSR1	0.127687
Sugathan2014:0001 Sugathan2014_CHD8BindingPartner	int97:chr2:118368816..118873792	chr2:118776049..118887597	51141	INSIG2	0.127687
Sugathan2014:0001 Sugathan2014_CHD8BindingPartner	int807,int254:chr3:50058610..50412945	chr3:50056340..50176397	10181	RBM5	0.127687
Sugathan2014:0001 Sugathan2014_CHD8BindingPartner	int118:chr4:160185669..160355746	chr4:160118997..160301301	9693	RAPGEF2	0.127687
Sugathan2014:0001 Sugathan2014_CHD8BindingPartner	int604:chr10:91057358..91185257	chr10:91017575..91200759	3437,24138	IFIT3,IFIT5	0.127687
Sugathan2014:0001 Sugathan2014_CHD8BindingPartner	int916:chr17:42009211..42272586	chr17:42068555..42345529	84336,92579,10014,79089,56970	TMEM101,G6PC3,HDAC5,TMUB2,ATXN7L3	0.127687
Sugathan2014:0001 Sugathan2014_CHD8BindingPartner	int948:chr18:23805393..24047874	chr18:24014873..24307365	284252	KCTD1	0.127687
Sugathan2014:0001 Sugathan2014_CHD8BindingPartner	int545:chr10:91369885..91593216	chr10:91319253..91554700	53354,9585	PANK1,KIF20B	0.127687
Sugathan2014:0001 Sugathan2014_CHD8BindingPartner	int803,int176:chr2:162193238..162878404	chr2:162094785..162288228	10213	PSMD14	0.127687
Sugathan2014:0001 Sugathan2014_CHD8BindingPartner	int603:chr4:15395591..15499481	chr4:15401488..15727035	57545,26234,285550	CC2D2A,FBXL5,FAM200B	0.127687
Sugathan2014:0001 Sugathan2014_CHD8BindingPartner	int637:chr11:2956783..3091788	chr11:2945659..3083607	4676	NAP1L4	0.127687
Sugathan2014:0001 Sugathan2014_CHD8BindingPartner	int570,int466:chr3:155585172..156005151	chr3:155460400..155642248	285315,9197	C3ORF33,SLC33A1	0.127687
Sugathan2014:0001 Sugathan2014_CHD8BindingPartner	int471:chr12:51983427..52209780	chr12:51915019..52226648	6334	SCN8A	0.127687
Sugathan2014:0001 Sugathan2014_CHD8BindingPartner	int410:chr11:115432255..115476687	chr11:115024344..115445241	23705	CADM1	0.127687
Sugathan2014:0001 Sugathan2014_CHD8BindingPartner	int765,int18:chr3:179812133..180292831	chr3:180249917..180356135	151613	TTC14	0.127687
Sugathan2014:0001 Sugathan2014_CHD8BindingPartner	int192,int981:chr3:10281647..10510287	chr3:10322612..10432872	6396	SEC13	0.127687
Sugathan2014:0001 Sugathan2014_CHD8BindingPartner	int364:chr7:1877501..2247496	chr7:2211856..2440377	4521,29960,8662	NUDT1,FTSJ2,EIF3B	0.127687
Sugathan2014:0001 Sugathan2014_CHD8BindingPartner	int186,int306,int339,int46,int580:chr12:96089725..96302462	chr12:96182708..96280238	6636	SNRPF	0.127687
Sugathan2014:0001 Sugathan2014_CHD8BindingPartner	int817:chr1:234765989..234789591	chr1:234720014..234815271	359948	IRF2BP2	0.127687
Sugathan2014:0001 Sugathan2014_CHD8BindingPartner	int516:chr17:66547409..66560097	chr17:66339763..66567457	5573	PRKAR1A	0.127687
Sugathan2014:0001 Sugathan2014_CHD8BindingPartner	int358:chr1:192991783..193429853	chr1:192958551..193243942	6738,51377,79577	TROVE2,UCHL5,CDC73	0.127687
Sugathan2014:0001 Sugathan2014_CHD8BindingPartner	int126:chr1:42274619..42350417	chr1:41952035..42454378	59269	HIVEP3	0.127687
Sugathan2014:0001 Sugathan2014_CHD8BindingPartner	int299:chr13:98966784..99020971	chr13:98724815..99122027	10160	FARP1	0.127687
Sugathan2014:0001 Sugathan2014_CHD8BindingPartner	int905:chr5:136989278..137171477	chr5:137067072..137160039	10949	HNRNPA0	0.127687
Sugathan2014:0001 Sugathan2014_CHD8BindingPartner	int172,int492:chr14:24662857..24721665	chr14:24629424..24982111	79711,51292,10548,100528064,5875,115817,4776,23351,56948	IPO4,GMPR2,TM9SF1,NEDD8-MDP1,RABGGTA,DHRS1,NFATC4,KHNYN,SDR39U1	0.127687
Sugathan2014:0001 Sugathan2014_CHD8BindingPartner	int123,int408,int72:chr16:2014130..2289455	chr16:2185177..2388413	64223,1632,10921	MLST8,ECI1,RNPS1	0.127687
Sugathan2014:0001 Sugathan2014_CHD8BindingPartner	int790:chr5:145467826..145674091	chr5:145472588..145688784	51520,54439	LARS,RBM27	0.127687
Sugathan2014:0001 Sugathan2014_CHD8BindingPartner	int656:chr16:5143791..5200693	chr16:5051809..5157380	56052,51172	ALG1,NAGPA	0.127687
Sugathan2014:0001 Sugathan2014_CHD8BindingPartner	int893:chr11:10536116..10561245	chr11:10513224..10632774	50862	RNF141	0.127687
Sugathan2014:0001 Sugathan2014_CHD8BindingPartner	int281:chr22:42905055..42920541	chr22:42884340..43115405	27341,84271,1727	RRP7A,POLDIP3,CYB5R3	0.127687
Sugathan2014:0001 Sugathan2014_CHD8BindingPartner	int25,int92:chr12:3890095..4001019	chr12:3898026..4052614	57097	PARP11	0.127687
Sugathan2014:0001 Sugathan2014_CHD8BindingPartner	int910:chr1:169356004..169460865	chr1:169413148..169525208	10560	SLC19A2	0.127687
Sugathan2014:0001 Sugathan2014_CHD8BindingPartner	int394,int794,int346,int87,int639:chr18:9478794..9988562	chr18:9526788..9980018	9989,11031,9218	PPP4R1,RAB31,VAPA	0.127687
Sugathan2014:0001 Sugathan2014_CHD8BindingPartner	int233,int964:chr19:53743855..53780026	chr19:53718637..53828111	342926	ZNF677	0.127687
Sugathan2014:0001 Sugathan2014_CHD8BindingPartner	int284:chr15:70428667..70434356	chr15:70320129..70460256	7090	TLE3	0.127687
Sugathan2014:0001 Sugathan2014_CHD8BindingPartner	int861,int395:chr19:4856287..4872275	chr19:4833091..4982165	29128	UHRF1	0.127687
Sugathan2014:0001 Sugathan2014_CHD8BindingPartner	int991:chr12:16205657..16254406	chr12:15965287..16210315	11171,51071	STRAP,DERA	0.127687
Sugathan2014:0001 Sugathan2014_CHD8BindingPartner	int391:chr2:237021346..237136992	chr2:237053878..237146652	2637	GBX2	0.127687
Sugathan2014:0001 Sugathan2014_CHD8BindingPartner	int543:chr15:72097992..73161393	chr15:72908519..73146126	585,83440	BBS4,ADPGK	0.127687
Sugathan2014:0001 Sugathan2014_CHD8BindingPartner	int478:chr20:21056805..21246620	chr20:21213941..21390463	22803	XRN2	0.127687
Sugathan2014:0001 Sugathan2014_CHD8BindingPartner	int557:chr17:65060773..65276451	chr17:65046553..66062970	9931,26207,5718,25926,2186,3838	HELZ,PITPNC1,PSMD12,NOL11,BPTF,KPNA2	0.127687
Sugathan2014:0001 Sugathan2014_CHD8BindingPartner	int524,int169,int177,int40:chr17:72839130..73534485	chr17:72838618..73581664	2232,3396,23510,10476,79637,30833,51155,6613,51081,23163,2885,9772,283989,57513	FDXR,ICT1,KCTD2,ATP5H,ARMC7,NT5C,HN1,SUMO2,MRPS7,GGA3,GRB2,TMEM94,TSEN54,CASKIN2	0.127687
Sugathan2014:0001 Sugathan2014_CHD8BindingPartner	int468:chr2:233465847..233523617	chr2:233492014..233745289	26058	GIGYF2	0.127687
Sugathan2014:0001 Sugathan2014_CHD8BindingPartner	int915:chr16:11460924..11475167	chr16:11369294..11465620	116028	RMI2	0.127687
Sugathan2014:0001 Sugathan2014_CHD8BindingPartner	int852:chr1:89847153..90065293	chr1:89920396..90083420	23507	LRRC8B	0.127687
Sugathan2014:0001 Sugathan2014_CHD8BindingPartner	int324,int830:chr7:12139784..12309141	chr7:12180847..12296890	54664	TMEM106B	0.127687
Sugathan2014:0001 Sugathan2014_CHD8BindingPartner	int690:chr22:38387223..38387224	chr22:38383261..38491708	9463	PICK1	0.127687
Sugathan2014:0001 Sugathan2014_CHD8BindingPartner	int942:chr1:47687084..47997658	chr1:47729468..47864511	51727	CMPK1	0.127687
Sugathan2014:0001 Sugathan2014_CHD8BindingPartner	int966,int414:chr2:206952515..207224602	chr2:206838444..207094243	54891,1933,4719	INO80D,EEF1B2,NDUFS1	0.127687
Sugathan2014:0001 Sugathan2014_CHD8BindingPartner	int215:chr6:113973847..114133862	chr6:114108513..114204652	4082	MARCKS	0.127687
Sugathan2014:0001 Sugathan2014_CHD8BindingPartner	int618,int77:chr2:98998983..100146146	chr2:99593723..99867492	80705,51601,51263,129531	TSGA10,LIPT1,MRPL30,MITD1	0.127687
Sugathan2014:0001 Sugathan2014_CHD8BindingPartner	int613:chr2:238857006..239037273	chr2:238805586..238971423	140739	UBE2F	0.127687
Sugathan2014:0001 Sugathan2014_CHD8BindingPartner	int896:chr4:140664444..140676533	chr4:140516921..141145233	4258,55534	MGST2,MAML3	0.127687
Sugathan2014:0001 Sugathan2014_CHD8BindingPartner	int213:chr5:171260919..171274885	chr5:171268555..171951527	23291,6793,92181,285590	FBXW11,STK10,UBTD2,SH3PXD2B	0.127687
Sugathan2014:0001 Sugathan2014_CHD8BindingPartner	int312:chr5:108990708..109220991	chr5:108955066..109225326	4124	MAN2A1	0.127687
Sugathan2014:0001 Sugathan2014_CHD8BindingPartner	int935:chr19:56837099..56879488	chr19:56845382..57114262	147949,147948,63934,388566	ZNF583,ZNF582,ZNF667,ZNF470	0.127687
Sugathan2014:0001 Sugathan2014_CHD8BindingPartner	int294:chr21:38458048..38598090	chr21:38103188..38709833	3141,7267,51227,10311	HLCS,TTC3,PIGP,DSCR3	0.127687
Sugathan2014:0001 Sugathan2014_CHD8BindingPartner	int692,int698:chr1:198052735..198451136	chr1:198056107..198311548	140609	NEK7	0.127687
Sugathan2014:0001 Sugathan2014_CHD8BindingPartner	int385:chr14:56521676..56591404	chr14:56515092..56788031	57161	PELI2	0.127687
Sugathan2014:0001 Sugathan2014_CHD8BindingPartner	int360:chr12:110060137..110740470	chr12:110268078..110958216	84260,9815,28981,488,51434,10094	TCHP,GIT2,IFT81,ATP2A2,ANAPC7,ARPC3	0.127687
Sugathan2014:0001 Sugathan2014_CHD8BindingPartner	int976:chr2:170274818..170578931	chr2:170366261..170514254	79675,9360	FASTKD1,PPIG	0.127687
Sugathan2014:0001 Sugathan2014_CHD8BindingPartner	int739:chr8:128675771..128679252	chr8:128678314..128773680	4609	MYC	0.127687
Sugathan2014:0001 Sugathan2014_CHD8BindingPartner	int552:chr15:75960767..76088345	chr15:75739461..76002664	5780,55272	PTPN9,IMP3	0.127687
Sugathan2014:0001 Sugathan2014_CHD8BindingPartner	int378:chr15:96835281..96866320	chr15:96799156..96903492	7026	NR2F2	0.127687
Sugathan2014:0001 Sugathan2014_CHD8BindingPartner	int199:chr12:108034827..108139363	chr12:108009589..108224914	11137,11108	PWP1,PRDM4	0.127687
Sugathan2014:0001 Sugathan2014_CHD8BindingPartner	int320:chr1:13954726..13956807	chr1:13840251..13964452	10630	PDPN	0.127687
Sugathan2014:0001 Sugathan2014_CHD8BindingPartner	int73:chr19:7636751..7731619	chr19:7664410..7764439	56949	XAB2	0.127687
Sugathan2014:0001 Sugathan2014_CHD8BindingPartner	int261:chr11:57989089..58437328	chr11:58274343..58415712	9404,80829	LPXN,ZFP91	0.127687
Sugathan2014:0001 Sugathan2014_CHD8BindingPartner	int697:chr7:16408071..16480989	chr7:16107151..16530947	729920	ISPD	0.127687
Sugathan2014:0001 Sugathan2014_CHD8BindingPartner	int131:chr5:96218598..96316470	chr5:96076513..96219848	51752	ERAP1	0.127687
Sugathan2014:0001 Sugathan2014_CHD8BindingPartner	int802:chr12:4734085..4734085	chr12:4577949..4828213	10635,4704,10566	RAD51AP1,NDUFA9,AKAP3	0.127687
Sugathan2014:0001 Sugathan2014_CHD8BindingPartner	int615:chr7:63757160..64210052	chr7:63960254..64411955	340252,51427,7697,10793	ZNF680,ZNF107,ZNF138,ZNF273	0.127687
Sugathan2014:0001 Sugathan2014_CHD8BindingPartner	int571,int445:chr7:5862648..5983553	chr7:5868340..6221195	51622,7965,5395,27102,84132	CCZ1,AIMP2,PMS2,EIF2AK1,USP42	0.127687
Sugathan2014:0001 Sugathan2014_CHD8BindingPartner	int871:chr19:47969394..48115083	chr19:47958397..48280323	11133,29998,29997	KPTN,GLTSCR1,GLTSCR2	0.127687
Sugathan2014:0001 Sugathan2014_CHD8BindingPartner	int310:chr2:64885133..64914631	chr2:64611326..64951046	29094,54812,9792	LGALSL,AFTPH,SERTAD2	0.127687
Sugathan2014:0001 Sugathan2014_CHD8BindingPartner	int322:chr11:114040325..114092582	chr11:113860430..114141397	7704	ZBTB16	0.127687
Sugathan2014:0001 Sugathan2014_CHD8BindingPartner	int170:chr14:73343471..73717433	chr14:73455220..73710399	58517,5663	RBM25,PSEN1	0.127687
Sugathan2014:0001 Sugathan2014_CHD8BindingPartner	int946:chr11:9964346..10331664	chr11:9780213..10385754	81846,133	SBF2,ADM	0.127687
Sugathan2014:0001 Sugathan2014_CHD8BindingPartner	int376:chr9:14366507..14373886	chr9:14061841..14468982	4781	NFIB	0.127687
Sugathan2014:0001 Sugathan2014_CHD8BindingPartner	int180:chr5:32461803..32493382	chr5:32104823..32514844	64083,54545,51663	GOLPH3,MTMR12,ZFR	0.127687
Sugathan2014:0001 Sugathan2014_CHD8BindingPartner	int807,int254:chr3:50058610..50412945	chr3:50194119..50334602	2771,7869	GNAI2,SEMA3B	0.127687
Sugathan2014:0001 Sugathan2014_CHD8BindingPartner	int804:chr10:11959691..12107640	chr10:11942020..12312589	26019,55176,8872,11164	UPF2,SEC61A2,CDC123,NUDT5	0.127687
Sugathan2014:0001 Sugathan2014_CHD8BindingPartner	int113,int998:chr4:72510..498459	chr4:413772..562960	170960,54872	ZNF721,PIGG	0.127687
Sugathan2014:0001 Sugathan2014_CHD8BindingPartner	int774:chr8:49888974..50369079	chr8:49810238..49903999	6591	SNAI2	0.127687
Sugathan2014:0001 Sugathan2014_CHD8BindingPartner	int214:chr15:34106037..34158266	chr15:34138427..34401303	57099	AVEN	0.127687
Sugathan2014:0001 Sugathan2014_CHD8BindingPartner	int526:chr10:117978024..117997389	chr10:117796441..118103126	2674	GFRA1	0.127687
Sugathan2014:0001 Sugathan2014_CHD8BindingPartner	int98:chr9:6568116..6610892	chr9:6343150..7195648	115426,2731,23081	UHRF2,GLDC,KDM4C	0.127687
Sugathan2014:0001 Sugathan2014_CHD8BindingPartner	int504:chr19:20864227..20893225	chr19:20700797..20914402	100129842,199777	ZNF737,ZNF626	0.127687
Sugathan2014:0001 Sugathan2014_CHD8BindingPartner	int870:chr22:46911745..46922134	chr22:46661297..47003067	55687,9620	TRMU,CELSR1	0.127687
Sugathan2014:0001 Sugathan2014_CHD8BindingPartner	int806:chr18:74030680..74061749	chr18:74049636..74277146	9658	ZNF516	0.127687
Sugathan2014:0001 Sugathan2014_CHD8BindingPartner	int221,int448,int141:chr7:129433365..129594320	chr7:129450572..129761291	7328,51530	UBE2H,ZC3HC1	0.127687
Sugathan2014:0001 Sugathan2014_CHD8BindingPartner	int641:chr18:32622168..32926744	chr18:32750993..32994431	84307,100101467,7572	ZNF397,ZSCAN30,ZNF24	0.127687
Sugathan2014:0001 Sugathan2014_CHD8BindingPartner	int974:chr8:41723550..41935324	chr8:41766996..42048701	7994,10947	KAT6A,AP3M2	0.127687
Sugathan2014:0001 Sugathan2014_CHD8BindingPartner	int776:chr19:6312290..6323207	chr19:6291462..6529781	8192,2962,8570,79085	CLPP,GTF2F1,KHSRP,SLC25A23	0.127687
Sugathan2014:0001 Sugathan2014_CHD8BindingPartner	int611,int483:chr15:90580008..90756292	chr15:90353830..90645432	100526783,374655	C15ORF38-AP3S2,ZNF710	0.127687
Sugathan2014:0001 Sugathan2014_CHD8BindingPartner	int468:chr2:233465847..233523617	chr2:233345296..233485300	9470,200765	EIF4E2,TIGD1	0.127687
Sugathan2014:0001 Sugathan2014_CHD8BindingPartner	int670:chr9:84253427..84274151	chr9:84178597..84374450	7088	TLE1	0.127687
Sugathan2014:0001 Sugathan2014_CHD8BindingPartner	int106,int182,int348:chr10:103804114..104209407	chr10:103524199..104438076	10724,79591,23082,9221,8729,4791,79176,5662,79004,51684,10121,81603	MGEA5,C10ORF76,PPRC1,NOLC1,GBF1,NFKB2,FBXL15,PSD,CUEDC2,SUFU,ACTR1A,TRIM8	0.127687
Sugathan2014:0001 Sugathan2014_CHD8BindingPartner	int709:chr1:212882450..213004927	chr1:212879494..213035139	25936,128387	NSL1,TATDN3	0.127687
Sugathan2014:0001 Sugathan2014_CHD8BindingPartner	int236:chr16:66874574..66874574	chr16:66734798..67154958	1783,8883,8824,51647,865	DYNC1LI2,NAE1,CES2,FAM96B,CBFB	0.127687
Sugathan2014:0001 Sugathan2014_CHD8BindingPartner	int150:chr13:111719291..111780597	chr13:111697623..111978081	8874	ARHGEF7	0.127687
Sugathan2014:0001 Sugathan2014_CHD8BindingPartner	int33:chr7:114593865..114747072	chr7:114492208..114679970	29969	MDFIC	0.127687
Sugathan2014:0001 Sugathan2014_CHD8BindingPartner	int546:chr19:51134298..51152949	chr19:51000149..51141302	94030	LRRC4B	0.127687
Pinto2014:0005 Pinto2014_FMRP	int89:chr12:132417451..132571956	chr12:132364464..132585011	57634	EP400	0.138286
Pinto2014:0005 Pinto2014_FMRP	int546:chr19:51134298..51152949	chr19:51145083..51290195	50944	SHANK1	0.138286
Pinto2014:0005 Pinto2014_FMRP	int928:chr20:41780017..41783638	chr20:40681391..41888557	11122	PTPRT	0.138286
Pinto2014:0005 Pinto2014_FMRP	int713:chr13:67306783..67472713	chr13:66856965..67874468	5101	PCDH9	0.138286
Pinto2014:0005 Pinto2014_FMRP	int309,int456,int686:chr9:9209799..9440297	chr9:8294245..10682723	5789	PTPRD	0.138286
Pinto2014:0005 Pinto2014_FMRP	int528:chr2:230618034..230870007	chr2:230608552..230856725	9320	TRIP12	0.138286
Pinto2014:0005 Pinto2014_FMRP	int996,int913:chr1:210939131..211643017	chr1:210831656..211377457	3756	KCNH1	0.138286
Pinto2014:0005 Pinto2014_FMRP	int710,int81:chr15:54355939..54400068	chr15:54235100..54940806	440279	UNC13C	0.138286
Pinto2014:0005 Pinto2014_FMRP	int518:chr14:79681303..79767060	chr14:78800073..80354633	9369	NRXN3	0.138286
Sugathan2014:0002 Sugathan2014_M1	int898:chr15:62874445..62911117	chr15:62869509..63156829	83660	TLN2	0.149485
Sugathan2014:0002 Sugathan2014_M1	int923,int643:chr1:169651770..170054087	chr1:169870469..170113879	22920	KIFAP3	0.149485
Sugathan2014:0002 Sugathan2014_M1	int990:chr2:202613635..202666254	chr2:202544985..202715895	57679	ALS2	0.149485
Sugathan2014:0002 Sugathan2014_M1	int122,int331:chr1:184737999..184945900	chr1:184740158..185013718	116496	FAM129A	0.149485
Sugathan2014:0002 Sugathan2014_M1	int590:chr18:55310072..55325982	chr18:55192072..55323969	2235	FECH	0.149485
Sugathan2014:0002 Sugathan2014_M1	int108,int353:chr19:49451217..49659014	chr19:49388116..49485055	581	BAX	0.149485
Sugathan2014:0002 Sugathan2014_M1	int110,int650:chr1:43970956..44369444	chr1:44045796..44191189	9682	KDM4A	0.149485
Sugathan2014:0002 Sugathan2014_M1	int41:chr1:236899343..236938860	chr1:236779753..236947927	88	ACTN2	0.149485
Sugathan2014:0002 Sugathan2014_M1	int394,int794,int346,int87,int639:chr18:9478794..9988562	chr18:9526788..9684605	9989	PPP4R1	0.149485
Sugathan2014:0002 Sugathan2014_M1	int661:chr12:31799621..31801645	chr12:31730093..31842016	254013	METTL20	0.149485
Sugathan2014:0002 Sugathan2014_M1	int406:chr3:121342819..121727963	chr3:121484033..121625373	55840	EAF2	0.149485
Sugathan2014:0002 Sugathan2014_M1	int604:chr10:91057358..91185257	chr10:90991705..91089033	3433	IFIT2	0.149485
Sugathan2014:0002 Sugathan2014_M1	int675:chr5:125882825..125882825	chr5:125866606..125982944	51808	PHAX	0.149485
Sugathan2014:0002 Sugathan2014_M1	int516:chr17:66547409..66560097	chr17:66339763..66567457	5573	PRKAR1A	0.149485
Sugathan2014:0002 Sugathan2014_M1	int17:chr20:5029207..5042089	chr20:5037406..5198533	8760	CDS2	0.149485
Sugathan2014:0002 Sugathan2014_M1	int671,int31,int450:chr3:69832851..70217984	chr3:69718585..70037488	4286	MITF	0.149485
Sugathan2014:0002 Sugathan2014_M1	int651:chr18:43617872..43716475	chr18:43683987..43866955	147339	C18ORF25	0.149485
Sugathan2014:0002 Sugathan2014_M1	int791:chr2:214845451..214845453	chr2:214079102..215295225	79582	SPAG16	0.149485
Sugathan2014:0002 Sugathan2014_M1	int194:chr14:68970211..69010925	chr14:68216495..69082738	5890	RAD51B	0.149485
Sugathan2014:0002 Sugathan2014_M1	int796:chr3:28277894..28644307	chr3:28343843..28460618	64343	AZI2	0.149485
Sugathan2014:0002 Sugathan2014_M1	int172,int492:chr14:24662857..24721665	chr14:24658786..24753036	29082	CHMP4A	0.149485
Sugathan2014:0002 Sugathan2014_M1	int449:chr3:107823224..108545856	chr3:108238336..108433693	9666	DZIP3	0.149485
Sugathan2014:0002 Sugathan2014_M1	int543:chr15:72097992..73161393	chr15:72908519..73050817	585	BBS4	0.149485
Sugathan2014:0002 Sugathan2014_M1	int409:chr3:15775446..16066785	chr3:15582210..15971053	26061,23243	HACL1,ANKRD28	0.149485
Sugathan2014:0002 Sugathan2014_M1	int631,int222,int501:chr2:62905539..64334456	chr2:63998097..64138696	7360	UGP2	0.149485
Sugathan2014:0002 Sugathan2014_M1	int206:chr12:53716133..53929672	chr12:53880473..53971422	8620	NPFF	0.149485
Sugathan2014:0002 Sugathan2014_M1	int10,int115:chr9:124971170..124982500	chr9:124981833..125097143	92400	RBM18	0.149485
Sugathan2014:0002 Sugathan2014_M1	int528:chr2:230618034..230870007	chr2:230202344..230856725	92737,9320	DNER,TRIP12	0.149485
Sugathan2014:0002 Sugathan2014_M1	int966,int414:chr2:206952515..207224602	chr2:206838444..207020906	54891	INO80D	0.149485
Sugathan2014:0002 Sugathan2014_M1	int15,int62,int95,int225:chr9:119138164..119529014	chr9:119167503..120247317	23245	ASTN2	0.149485
Sugathan2014:0002 Sugathan2014_M1	int884:chr2:150160052..150193025	chr2:150116498..150350659	130574	LYPD6	0.149485
Sugathan2014:0002 Sugathan2014_M1	int544:chr7:37532418..37737176	chr7:36872510..37558929	9844	ELMO1	0.149485
Sugathan2014:0002 Sugathan2014_M1	int822:chr2:72395464..73084166	chr2:72386443..73123177	23233	EXOC6B	0.149485
Sugathan2014:0002 Sugathan2014_M1	int642:chr22:36216155..36440240	chr22:36114782..36494585	23543	RBFOX2	0.149485
Sugathan2014:0002 Sugathan2014_M1	int440:chr15:102085503..102093632	chr15:101824132..102100187	5046	PCSK6	0.149485
Parikshak2013:0016 Parikshak2013_M17	int910:chr1:169356004..169460865	chr1:169005946..169407201	481,29922	ATP1B1,NME7	0.161184
Parikshak2013:0016 Parikshak2013_M17	int722:chr3:1114303..1114366	chr3:1064341..1465292	27255	CNTN6	0.161184
Parikshak2013:0016 Parikshak2013_M17	int265:chr5:130655526..131539255	chr5:131265666..131417761	23305	ACSL6	0.161184
Parikshak2013:0016 Parikshak2013_M17	int740,int957:chr12:130869054..130906479	chr12:130860680..131072410	23504	RIMBP2	0.161184
Parikshak2013:0016 Parikshak2013_M17	int303:chr13:96058183..96087296	chr13:96015852..96252010	9071	CLDN10	0.161184
Parikshak2013:0016 Parikshak2013_M17	int419:chr10:129769429..129824976	chr10:129635324..129904164	5791	PTPRE	0.161184
Parikshak2013:0016 Parikshak2013_M17	int652,int424,int424,int85,int458:chr17:48396110..48647011	chr17:48554449..48724832	64847,8913	SPATA20,CACNA1G	0.161184
Parikshak2013:0016 Parikshak2013_M17	int829:chr6:38338015..38342083	chr6:38116226..38677924	114781	BTBD9	0.161184
Parikshak2013:0016 Parikshak2013_M17	int951:chr12:27861268..27957674	chr12:27607044..27868497	8496	PPFIBP1	0.161184
Parikshak2013:0016 Parikshak2013_M17	int934:chr10:12597881..12628735	chr10:12321541..12897545	57118	CAMK1D	0.161184
Parikshak2013:0016 Parikshak2013_M17	int781:chr1:46615056..46892812	chr1:46789938..46899520	2166	FAAH	0.161184
Parikshak2013:0016 Parikshak2013_M17	int770:chr3:3022997..3023000	chr3:2070549..3119645	152330	CNTN4	0.161184
Parikshak2013:0016 Parikshak2013_M17	int689:chr3:35676532..35775455	chr3:35610665..35855988	10777	ARPP21	0.161184
Parikshak2013:0016 Parikshak2013_M17	int44:chr3:6880004..6902624	chr3:6832801..7803218	2917	GRM7	0.161184
Parikshak2013:0016 Parikshak2013_M17	int702:chr15:32995468..33062361	chr15:32940204..33046870	26585	GREM1	0.161184
Parikshak2013:0016 Parikshak2013_M17	int909:chr12:86971635..87287609	chr12:86353036..87302681	25834	MGAT4C	0.161184
Parikshak2013:0016 Parikshak2013_M17	int939:chr6:109279211..109468770	chr6:109287639..109485708	27244	SESN1	0.161184
Parikshak2013:0016 Parikshak2013_M17	int83:chr11:24759535..24770151	chr11:24448515..25124186	338645	LUZP2	0.161184
Parikshak2013:0016 Parikshak2013_M17	int106,int182,int348:chr10:103804114..104209407	chr10:104142373..104249691	5662	PSD	0.161184
Parikshak2013:0016 Parikshak2013_M17	int192,int981:chr3:10281647..10510287	chr3:10345706..10617268	491	ATP2B2	0.161184
Parikshak2013:0016 Parikshak2013_M17	int268:chr7:77862252..77953248	chr7:77626373..79152890	9863	MAGI2	0.161184
Parikshak2013:0016 Parikshak2013_M17	int983,int302,int623,int669:chr1:151833831..152141922	chr1:151790338..151896173	100191040,284486	C2CD4D,THEM5	0.161184
Parikshak2013:0016 Parikshak2013_M17	int618,int77:chr2:98998983..100146146	chr2:99215568..99417589	11320	MGAT4A	0.161184
Parikshak2013:0016 Parikshak2013_M17	int108,int353:chr19:49451217..49659014	chr19:49552645..49674287	8541	PPFIA3	0.161184
Parikshak2013:0016 Parikshak2013_M17	int996,int913:chr1:210939131..211643017	chr1:211429956..211568286	7188	TRAF5	0.161184
Parikshak2013:0016 Parikshak2013_M17	int528:chr2:230618034..230870007	chr2:229868688..230649286	55022,92737	PID1,DNER	0.161184
Parikshak2013:0016 Parikshak2013_M17	int498:chr22:36578082..36599659	chr22:36516370..36632225	80833	APOL3	0.161184
Parikshak2013:0016 Parikshak2013_M17	int97:chr2:118368816..118873792	chr2:118776049..118887597	51141	INSIG2	0.161184
Parikshak2013:0016 Parikshak2013_M17	int862:chr4:20253438..20253438	chr4:20183527..20642184	9353	SLIT2	0.161184
Parikshak2013:0016 Parikshak2013_M17	int655:chr10:16557186..16617359	chr10:16408941..16634004	9317,389941	PTER,C1QL3	0.161184
Parikshak2013:0016 Parikshak2013_M17	int590:chr18:55310072..55325982	chr18:55293658..55540327	5205	ATP8B1	0.161184
Parikshak2013:0016 Parikshak2013_M17	int656:chr16:5143791..5200693	chr16:5054844..5153942	51172	NAGPA	0.161184
Parikshak2013:0016 Parikshak2013_M17	int969:chr8:2827474..2911322	chr8:2772874..4922328	64478	CSMD1	0.161184
Parikshak2013:0016 Parikshak2013_M17	int135,int45,int386:chr3:70900385..71194680	chr3:70983864..71703140	27086	FOXP1	0.161184
Parikshak2013:0016 Parikshak2013_M17	int187:chr11:124406100..124446589	chr11:124422741..124616199	84897,54414	TBRG1,SIAE	0.161184
Parikshak2013:0016 Parikshak2013_M17	int183:chr3:47588649..48326433	chr3:47583727..47691730	10675	CSPG5	0.161184
Parikshak2013:0016 Parikshak2013_M17	int994:chr10:21406811..21458310	chr10:21048902..21533116	10529	NEBL	0.161184
Parikshak2013:0016 Parikshak2013_M17	int329:chr19:39475140..39545986	chr19:39494662..39593236	126433	FBXO27	0.161184
Parikshak2013:0016 Parikshak2013_M17	int41:chr1:236899343..236938860	chr1:236779753..236947927	88	ACTN2	0.161184
Parikshak2013:0016 Parikshak2013_M17	int717:chr11:114302800..114450708	chr11:114240107..114341000	25996	REXO2	0.161184
Parikshak2013:0016 Parikshak2013_M17	int131:chr5:96218598..96316470	chr5:96201345..96385115	4012	LNPEP	0.161184
Parikshak2013:0016 Parikshak2013_M17	int524,int169,int177,int40:chr17:72839130..73534485	chr17:72926838..73081984	283987,23510	HID1,KCTD2	0.161184
Parikshak2013:0016 Parikshak2013_M17	int265:chr5:130655526..131539255	chr5:130529701..130750382	56990	CDC42SE2	0.161184
Parikshak2013:0016 Parikshak2013_M17	int275,int488,int178,int78,int259,int715,int886,int432,int23,int598,int745,int325,int196:chr8:8088877..11886722	chr8:11557171..11664854	252969	NEIL2	0.161184
Parikshak2013:0016 Parikshak2013_M17	int917:chr21:40505513..40839630	chr21:40527371..40625440	8624	PSMG1	0.161184
Parikshak2013:0016 Parikshak2013_M17	int985:chr1:240300129..240300129	chr1:240185184..240658489	56776	FMN2	0.161184
Parikshak2013:0016 Parikshak2013_M17	int640,int663:chr17:28733862..29738071	chr17:29648641..29885236	84440	RAB11FIP4	0.161184
Parikshak2013:0016 Parikshak2013_M17	int267:chr10:48391129..48449237	chr10:48405787..48509138	2662	GDF10	0.161184
Parikshak2013:0016 Parikshak2013_M17	int941:chr2:101451819..101498230	chr2:101366612..101633287	4862	NPAS2	0.161184
Parikshak2013:0016 Parikshak2013_M17	int825:chr14:63292605..63510678	chr14:63153290..63581956	27133	KCNH5	0.161184
Parikshak2013:0016 Parikshak2013_M17	int887:chr1:225935369..225963665	chr1:225927775..226053262	2052	EPHX1	0.161184
Parikshak2013:0016 Parikshak2013_M17	int928:chr20:41780017..41783638	chr20:40681391..41888557	11122	PTPRT	0.161184
Parikshak2013:0016 Parikshak2013_M17	int206:chr12:53716133..53929672	chr12:53854275..53963444	7786	MAP3K12	0.161184
Parikshak2013:0016 Parikshak2013_M17	int447,int959:chr8:102749568..103193781	chr8:102678769..103207135	83988	NCALD	0.161184
Parikshak2013:0016 Parikshak2013_M17	int954:chr2:27281034..27934711	chr2:27302220..27411995	10669	CGREF1	0.161184
Parikshak2013:0016 Parikshak2013_M17	int700:chr3:190211244..190222954	chr3:190161839..190394986	3556	IL1RAP	0.161184
Parikshak2013:0016 Parikshak2013_M17	int301:chr15:29450081..29462476	chr15:29392454..29932927	23359	FAM189A1	0.161184
Parikshak2013:0016 Parikshak2013_M17	int937,int75:chr3:33066986..33194990	chr3:33171536..33330707	26032	SUSD5	0.161184
Parikshak2013:0016 Parikshak2013_M17	int586:chr17:71174027..71255954	chr17:71091159..71224645	6752,9382	SSTR2,COG1	0.161184
Parikshak2013:0016 Parikshak2013_M17	int389:chr1:230540900..230619350	chr1:230437391..230631674	79605	PGBD5	0.161184
Parikshak2013:0016 Parikshak2013_M17	int449:chr3:107823224..108545856	chr3:107741940..107879935	961	CD47	0.161184
Parikshak2013:0016 Parikshak2013_M17	int553:chr6:100329161..100426848	chr6:100347785..100512114	84539	MCHR2	0.161184
Parikshak2013:0016 Parikshak2013_M17	int784:chr22:44412952..44412952	chr22:44325090..44585112	29780	PARVB	0.161184
Parikshak2013:0016 Parikshak2013_M17	int709:chr1:212882450..213004927	chr1:212839758..212943327	55509	BATF3	0.161184
Parikshak2013:0016 Parikshak2013_M17	int184:chr2:228091192..228114954	chr2:227847426..228099275	1286	COL4A4	0.161184
Parikshak2013:0016 Parikshak2013_M17	int2,int666:chr6:46044196..46150542	chr6:45846189..46118085	53405	CLIC5	0.161184
Parikshak2013:0016 Parikshak2013_M17	int785:chr8:38014429..38316849	chr8:38019008..38140287	23259	DDHD2	0.161184
Parikshak2013:0016 Parikshak2013_M17	int479,int84:chr2:38947554..39173570	chr2:39076503..39222590	100271715	ARHGEF33	0.161184
Parikshak2013:0016 Parikshak2013_M17	int693:chr5:139191665..139207494	chr5:139206363..139528391	9542,492311	NRG2,IGIP	0.161184
Parikshak2013:0016 Parikshak2013_M17	int123,int408,int72:chr16:2014130..2289455	chr16:2207183..2316465	57524	CASKIN1	0.161184
Parikshak2013:0016 Parikshak2013_M17	int773:chr11:131582093..131606071	chr11:131170370..132226716	50863	NTM	0.161184
Parikshak2013:0016 Parikshak2013_M17	int487,int578:chr5:166984363..167900328	chr5:167649064..167919308	23286	WWC1	0.161184
Parikshak2013:0016 Parikshak2013_M17	int123,int408,int72:chr16:2014130..2289455	chr16:1969945..2064276	9143	SYNGR3	0.161184
Parikshak2013:0016 Parikshak2013_M17	int265:chr5:130655526..131539255	chr5:131508303..131633556	8974	P4HA2	0.161184
Parikshak2013:0016 Parikshak2013_M17	int544:chr7:37532418..37737176	chr7:36872510..37558929	9844	ELMO1	0.161184
Parikshak2013:0016 Parikshak2013_M17	int147:chr15:85173872..85452820	chr15:85178359..85271802	4828	NMB	0.161184
DeRubeis2014:0002 DeRubeis2014_NEURODEGENERATION	int803,int176:chr2:162193238..162878404	chr2:162202619..162301573	10716	TBR1	0.194781
DeRubeis2014:0002 DeRubeis2014_NEURODEGENERATION	int170:chr14:73343471..73717433	chr14:73533142..73710399	5663	PSEN1	0.194781
DeRubeis2014:0002 DeRubeis2014_NEURODEGENERATION	int589:chr17:43507403..44672951	chr17:43901747..44125699	4137	MAPT	0.194781
Sanders2015:0003 Sanders2015_TADA	int437,int428,int5,int514:chr6:43082651..43396608	chr6:42974005..43149458	5754	PTK7	0.248075
Sanders2015:0003 Sanders2015_TADA	int803,int176:chr2:162193238..162878404	chr2:162202619..162301573	10716	TBR1	0.248075
Sanders2015:0003 Sanders2015_TADA	int242:chr5:170284624..170694033	chr5:170218885..170747019	64901	RANBP17	0.248075
Sanders2015:0003 Sanders2015_TADA	int383:chr7:104524092..105087973	chr7:104584636..104774532	55904	KMT2E	0.248075
Sanders2015:0003 Sanders2015_TADA	int485:chr14:77496619..77532343	chr14:77470885..77565042	64207	IRF2BPL	0.248075
Sanders2015:0003 Sanders2015_TADA	int528:chr2:230618034..230870007	chr2:230608552..230856725	9320	TRIP12	0.248075
Sanders2015:0003 Sanders2015_TADA	int135,int45,int386:chr3:70900385..71194680	chr3:70983864..71703140	27086	FOXP1	0.248075
Sanders2015:0003 Sanders2015_TADA	int511,int162:chr21:41451731..41512161	chr21:41364342..42289039	1826	DSCAM	0.248075
Sanders2015:0003 Sanders2015_TADA	int756:chr3:20191506..20373412	chr3:20011523..20215896	8850	KAT2B	0.248075
Sanders2015:0002 Sanders2015_RISK_GENES	int383:chr7:104524092..105087973	chr7:104584636..104774532	55904	KMT2E	0.253975
Sanders2015:0002 Sanders2015_RISK_GENES	int528:chr2:230618034..230870007	chr2:230608552..230856725	9320	TRIP12	0.253975
Sanders2015:0002 Sanders2015_RISK_GENES	int756:chr3:20191506..20373412	chr3:20011523..20215896	8850	KAT2B	0.253975
Sanders2015:0002 Sanders2015_RISK_GENES	int90:chr7:73877809..73987405	chr7:73372118..74195022	2006,3984,7458,7462,5982,7461,9569,2969	ELN,LIMK1,EIF4H,LAT2,RFC2,CLIP2,GTF2IRD1,GTF2I	0.253975
Sanders2015:0002 Sanders2015_RISK_GENES	int485:chr14:77496619..77532343	chr14:77470885..77565042	64207	IRF2BPL	0.253975
Sanders2015:0002 Sanders2015_RISK_GENES	int437,int428,int5,int514:chr6:43082651..43396608	chr6:42974005..43149458	5754	PTK7	0.253975
Sanders2015:0002 Sanders2015_RISK_GENES	int803,int176:chr2:162193238..162878404	chr2:162202619..162301573	10716	TBR1	0.253975
Sanders2015:0002 Sanders2015_RISK_GENES	int511,int162:chr21:41451731..41512161	chr21:41364342..42289039	1826	DSCAM	0.253975
Sanders2015:0002 Sanders2015_RISK_GENES	int297:chr15:23931507..23949863	chr15:23868695..24002450	54551,4692	MAGEL2,NDN	0.253975
Sanders2015:0002 Sanders2015_RISK_GENES	int242:chr5:170284624..170694033	chr5:170218885..170747019	64901	RANBP17	0.253975
Sanders2015:0002 Sanders2015_RISK_GENES	int135,int45,int386:chr3:70900385..71194680	chr3:70983864..71703140	27086	FOXP1	0.253975
Sanders2015:0002 Sanders2015_RISK_GENES	int436:chr22:20031102..20162758	chr22:19631986..20207431	5413,2812,6899,54584,79680,10587,1312,128989,421,54487,5902,29801,27037,388849	SEPT5,GP1BB,TBX1,GNB1L,C22ORF29,TXNRD2,COMT,TANGO2,ARVCF,DGCR8,RANBP1,ZDHHC8,TRMT2A,CCDC188	0.253975
Darnell2011:0001 Darnell2011_FMRP_TARGETS	int15,int62,int95,int225:chr9:119138164..119529014	chr9:119379580..119483579	22954	TRIM32	0.264474
Darnell2011:0001 Darnell2011_FMRP_TARGETS	int294:chr21:38458048..38598090	chr21:38375570..38595408	7267	TTC3	0.264474
Darnell2011:0001 Darnell2011_FMRP_TARGETS	int546:chr19:51134298..51152949	chr19:51145083..51290195	50944	SHANK1	0.264474
Darnell2011:0001 Darnell2011_FMRP_TARGETS	int771:chr1:156403681..156474119	chr1:156413512..156540634	4209	MEF2D	0.264474
Darnell2011:0001 Darnell2011_FMRP_TARGETS	int730:chr20:37020978..37240766	chr20:37031448..37227504	57148	RALGAPB	0.264474
Darnell2011:0001 Darnell2011_FMRP_TARGETS	int471:chr12:51983427..52209780	chr12:51715100..52226648	9498,6334	SLC4A8,SCN8A	0.264474
Darnell2011:0001 Darnell2011_FMRP_TARGETS	int360:chr12:110060137..110740470	chr12:110649031..110808897	488	ATP2A2	0.264474
Darnell2011:0001 Darnell2011_FMRP_TARGETS	int275,int488,int178,int78,int259,int715,int886,int432,int23,int598,int745,int325,int196:chr8:8088877..11886722	chr8:8621998..8821131	9258	MFHAS1	0.264474
Darnell2011:0001 Darnell2011_FMRP_TARGETS	int640,int663:chr17:28733862..29738071	chr17:29351944..29724695	4763	NF1	0.264474
Darnell2011:0001 Darnell2011_FMRP_TARGETS	int724:chr17:1627704..1657899	chr17:1533922..1658176	10594	PRPF8	0.264474
Darnell2011:0001 Darnell2011_FMRP_TARGETS	int916:chr17:42009211..42272586	chr17:42134120..42271014	10014	HDAC5	0.264474
Darnell2011:0001 Darnell2011_FMRP_TARGETS	int172,int492:chr14:24662857..24721665	chr14:24629424..24728124	79711	IPO4	0.264474
Darnell2011:0001 Darnell2011_FMRP_TARGETS	int275,int488,int178,int78,int259,int715,int886,int432,int23,int598,int745,int325,int196:chr8:8088877..11886722	chr8:9343444..9659856	8658	TNKS	0.264474
Darnell2011:0001 Darnell2011_FMRP_TARGETS	int710,int81:chr15:54355939..54400068	chr15:54235100..54940806	440279	UNC13C	0.264474
Darnell2011:0001 Darnell2011_FMRP_TARGETS	int528:chr2:230618034..230870007	chr2:230608552..230856725	9320	TRIP12	0.264474
Darnell2011:0001 Darnell2011_FMRP_TARGETS	int474:chr2:222225453..222272013	chr2:222262746..222508922	2043	EPHA4	0.264474
Darnell2011:0001 Darnell2011_FMRP_TARGETS	int996,int913:chr1:210939131..211643017	chr1:210831656..211377457	3756	KCNH1	0.264474
Darnell2011:0001 Darnell2011_FMRP_TARGETS	int391:chr2:237021346..237136992	chr2:236332732..237060444	116987	AGAP1	0.264474
Darnell2011:0001 Darnell2011_FMRP_TARGETS	int118:chr4:160185669..160355746	chr4:160118997..160301301	9693	RAPGEF2	0.264474
Darnell2011:0001 Darnell2011_FMRP_TARGETS	int383:chr7:104524092..105087973	chr7:104584636..104774532	55904	KMT2E	0.264474
Darnell2011:0001 Darnell2011_FMRP_TARGETS	int436:chr22:20031102..20162758	chr22:19937401..20074309	421	ARVCF	0.264474
Darnell2011:0001 Darnell2011_FMRP_TARGETS	int997:chr12:125097041..125097710	chr12:124788956..125122010	9612	NCOR2	0.264474
Darnell2011:0001 Darnell2011_FMRP_TARGETS	int108,int353:chr19:49451217..49659014	chr19:49552645..49674287	8541	PPFIA3	0.264474
Darnell2011:0001 Darnell2011_FMRP_TARGETS	int831,int240,int846:chr5:16762024..16827737	chr5:16642015..17006385	4651	MYO10	0.264474
Darnell2011:0001 Darnell2011_FMRP_TARGETS	int660:chr16:24099496..24106227	chr16:23777299..24251932	5579	PRKCB	0.264474
Darnell2011:0001 Darnell2011_FMRP_TARGETS	int106,int182,int348:chr10:103804114..104209407	chr10:103935254..104249691	8729,5662	GBF1,PSD	0.264474
Darnell2011:0001 Darnell2011_FMRP_TARGETS	int36:chr1:37202097..37261085	chr1:37241127..37569844	2899	GRIK3	0.264474
Darnell2011:0001 Darnell2011_FMRP_TARGETS	int618,int77:chr2:98998983..100146146	chr2:98991320..99227496	3631	INPP4A	0.264474
Darnell2011:0001 Darnell2011_FMRP_TARGETS	int143:chr15:52811815..52811815	chr15:52579479..52891247	4644	MYO5A	0.264474
Darnell2011:0001 Darnell2011_FMRP_TARGETS	int206:chr12:53716133..53929672	chr12:53854275..53963444	7786	MAP3K12	0.264474
Darnell2011:0001 Darnell2011_FMRP_TARGETS	int123,int408,int72:chr16:2014130..2289455	chr16:2027989..2460747	7249,5310,57524,21	TSC2,PKD1,CASKIN1,ABCA3	0.264474
Darnell2011:0001 Darnell2011_FMRP_TARGETS	int520:chr1:116906839..116948712	chr1:116845794..116967396	476	ATP1A1	0.264474
Darnell2011:0001 Darnell2011_FMRP_TARGETS	int676:chr11:35399975..35403124	chr11:35252751..35511610	6506	SLC1A2	0.264474
Darnell2011:0001 Darnell2011_FMRP_TARGETS	int546:chr19:51134298..51152949	chr19:51000149..51141302	94030	LRRC4B	0.264474
Darnell2011:0001 Darnell2011_FMRP_TARGETS	int515,int566,int293,int133,int863,int342:chr2:239997710..240327863	chr2:239949863..240392643	9759	HDAC4	0.264474
Darnell2011:0001 Darnell2011_FMRP_TARGETS	int990:chr2:202613635..202666254	chr2:202544985..202715895	57679	ALS2	0.264474
Darnell2011:0001 Darnell2011_FMRP_TARGETS	int284:chr15:70428667..70434356	chr15:70320129..70460256	7090	TLE3	0.264474
Darnell2011:0001 Darnell2011_FMRP_TARGETS	int701:chr2:173620465..173716172	chr2:173530524..173937620	11069	RAPGEF4	0.264474
Darnell2011:0001 Darnell2011_FMRP_TARGETS	int926:chr1:156647931..156655253	chr1:156541739..156649324	63827	BCAN	0.264474
Darnell2011:0001 Darnell2011_FMRP_TARGETS	int954:chr2:27281034..27934711	chr2:27528715..27649901	2976	GTF3C2	0.264474
Darnell2011:0001 Darnell2011_FMRP_TARGETS	int986:chr4:146748044..146821410	chr4:146658778..146930112	152485	ZNF827	0.264474
Darnell2011:0001 Darnell2011_FMRP_TARGETS	int192,int981:chr3:10281647..10510287	chr3:10345706..10617268	491	ATP2B2	0.264474
Darnell2011:0001 Darnell2011_FMRP_TARGETS	int485:chr14:77496619..77532343	chr14:77470885..77565042	64207	IRF2BPL	0.264474
Darnell2011:0001 Darnell2011_FMRP_TARGETS	int908:chr11:78399817..78440736	chr11:78344327..79221695	26011	TENM4	0.264474
Darnell2011:0001 Darnell2011_FMRP_TARGETS	int987,int495:chr10:80878219..80972653	chr10:80758791..81096285	57178	ZMIZ1	0.264474
Darnell2011:0001 Darnell2011_FMRP_TARGETS	int296,int629,int961:chr10:78778734..79019060	chr10:78609358..79467577	3778	KCNMA1	0.264474
Darnell2011:0001 Darnell2011_FMRP_TARGETS	int170:chr14:73343471..73717433	chr14:73416152..73563920	53349	ZFYVE1	0.264474
Darnell2011:0001 Darnell2011_FMRP_TARGETS	int871:chr19:47969394..48115083	chr19:47911278..48045307	6543	SLC8A2	0.264474
Darnell2011:0001 Darnell2011_FMRP_TARGETS	int740,int957:chr12:130869054..130906479	chr12:130860680..131072410	23504	RIMBP2	0.264474
Darnell2011:0001 Darnell2011_FMRP_TARGETS	int150:chr13:111719291..111780597	chr13:111697623..111978081	8874	ARHGEF7	0.264474
Darnell2011:0001 Darnell2011_FMRP_TARGETS	int110,int650:chr1:43970956..44369444	chr1:43926546..44109343	5792	PTPRF	0.264474
Darnell2011:0001 Darnell2011_FMRP_TARGETS	int399:chr8:19987914..19987914	chr8:19984703..20099207	526	ATP6V1B2	0.264474
Darnell2011:0001 Darnell2011_FMRP_TARGETS	int974:chr8:41723550..41935324	chr8:41490743..41979544	286,7994	ANK1,KAT6A	0.264474
Darnell2011:0001 Darnell2011_FMRP_TARGETS	int511,int162:chr21:41451731..41512161	chr21:41364342..42289039	1826	DSCAM	0.264474
Darnell2011:0001 Darnell2011_FMRP_TARGETS	int210:chr6:16714217..16753147	chr6:16279342..16831721	6310	ATXN1	0.264474
Darnell2011:0001 Darnell2011_FMRP_TARGETS	int900,int732:chr1:66983920..67221552	chr1:66929251..67236822	84251	SGIP1	0.264474
Darnell2011:0001 Darnell2011_FMRP_TARGETS	int268:chr7:77862252..77953248	chr7:77626373..79152890	9863	MAGI2	0.264474
Darnell2011:0001 Darnell2011_FMRP_TARGETS	int89:chr12:132417451..132571956	chr12:132309278..132585011	8408,57634	ULK1,EP400	0.264474
Darnell2011:0001 Darnell2011_FMRP_TARGETS	int689:chr3:35676532..35775455	chr3:35610665..35855988	10777	ARPP21	0.264474
Darnell2011:0001 Darnell2011_FMRP_TARGETS	int681:chr9:129954016..130076801	chr9:129955940..130175828	84253	GARNL3	0.264474
Darnell2011:0001 Darnell2011_FMRP_TARGETS	int618,int77:chr2:98998983..100146146	chr2:100143715..100829037	3899	AFF3	0.264474
Darnell2011:0001 Darnell2011_FMRP_TARGETS	int713:chr13:67306783..67472713	chr13:66856965..67874468	5101	PCDH9	0.264474
Darnell2011:0001 Darnell2011_FMRP_TARGETS	int110,int650:chr1:43970956..44369444	chr1:44342477..44453694	9670	IPO13	0.264474
Darnell2011:0001 Darnell2011_FMRP_TARGETS	int518:chr14:79681303..79767060	chr14:78800073..80354633	9369	NRXN3	0.264474
Darnell2011:0001 Darnell2011_FMRP_TARGETS	int589:chr17:43507403..44672951	chr17:44598034..44854828	4905	NSF	0.264474
Darnell2011:0001 Darnell2011_FMRP_TARGETS	int183:chr3:47588649..48326433	chr3:47774398..48200769	22907,4134	DHX30,MAP4	0.264474
Darnell2011:0001 Darnell2011_FMRP_TARGETS	int781:chr1:46615056..46892812	chr1:46724071..46839038	10489	LRRC41	0.264474
Darnell2011:0001 Darnell2011_FMRP_TARGETS	int898:chr15:62874445..62911117	chr15:62869509..63156829	83660	TLN2	0.264474
Darnell2011:0001 Darnell2011_FMRP_TARGETS	int652,int424,int424,int85,int458:chr17:48396110..48647011	chr17:48568428..48724832	8913	CACNA1G	0.264474
Darnell2011:0001 Darnell2011_FMRP_TARGETS	int309,int456,int686:chr9:9209799..9440297	chr9:8294245..10682723	5789	PTPRD	0.264474
Darnell2011:0001 Darnell2011_FMRP_TARGETS	int180:chr5:32461803..32493382	chr5:32334455..32514844	51663	ZFR	0.264474
Darnell2011:0001 Darnell2011_FMRP_TARGETS	int651:chr18:43617872..43716475	chr18:43644109..43754199	498	ATP5A1	0.264474
Darnell2011:0001 Darnell2011_FMRP_TARGETS	int437,int428,int5,int514:chr6:43082651..43396608	chr6:43079921..43275997	23113,84630	CUL9,TTBK1	0.264474
Darnell2011:0001 Darnell2011_FMRP_TARGETS	int847,int470:chr4:186491772..186859331	chr4:186486597..186947870	8470	SORBS2	0.264474
Darnell2011:0001 Darnell2011_FMRP_TARGETS	int928:chr20:41780017..41783638	chr20:40681391..41888557	11122	PTPRT	0.264474
Darnell2011:0001 Darnell2011_FMRP_TARGETS	int126:chr1:42274619..42350417	chr1:41952035..42454378	59269	HIVEP3	0.264474
Darnell2011:0001 Darnell2011_FMRP_TARGETS	int622,int181:chr7:70071979..70257129	chr7:68993904..70278054	26053	AUTS2	0.264474
Darnell2011:0001 Darnell2011_FMRP_TARGETS	int941:chr2:101451819..101498230	chr2:101366612..101633287	4862	NPAS2	0.264474
Darnell2011:0001 Darnell2011_FMRP_TARGETS	int341,int67,int535:chr10:61562977..61808880	chr10:61766055..62563284	288	ANK3	0.264474
Darnell2011:0001 Darnell2011_FMRP_TARGETS	int487,int578:chr5:166984363..167900328	chr5:166641842..167919308	57451,23286	TENM2,WWC1	0.264474
Darnell2011:0001 Darnell2011_FMRP_TARGETS	int852:chr1:89847153..90065293	chr1:89920396..90083420	23507	LRRC8B	0.264474
Darnell2011:0001 Darnell2011_FMRP_TARGETS	int562:chr17:10035379..10035379	chr17:9793925..10171868	8522	GAS7	0.264474
Iossifov2014:0006 Iossifov2014_FMRPTargets	int954:chr2:27281034..27934711	chr2:27528715..27649901	2976	GTF3C2	0.268273
Iossifov2014:0006 Iossifov2014_FMRPTargets	int740,int957:chr12:130869054..130906479	chr12:130860680..131072410	23504	RIMBP2	0.268273
Iossifov2014:0006 Iossifov2014_FMRPTargets	int192,int981:chr3:10281647..10510287	chr3:10345706..10617268	491	ATP2B2	0.268273
Iossifov2014:0006 Iossifov2014_FMRPTargets	int275,int488,int178,int78,int259,int715,int886,int432,int23,int598,int745,int325,int196:chr8:8088877..11886722	chr8:8621998..8821131	9258	MFHAS1	0.268273
Iossifov2014:0006 Iossifov2014_FMRPTargets	int900,int732:chr1:66983920..67221552	chr1:66929251..67236822	84251	SGIP1	0.268273
Iossifov2014:0006 Iossifov2014_FMRPTargets	int515,int566,int293,int133,int863,int342:chr2:239997710..240327863	chr2:239949863..240392643	9759	HDAC4	0.268273
Iossifov2014:0006 Iossifov2014_FMRPTargets	int928:chr20:41780017..41783638	chr20:40681391..41888557	11122	PTPRT	0.268273
Iossifov2014:0006 Iossifov2014_FMRPTargets	int974:chr8:41723550..41935324	chr8:41490743..41824280	286	ANK1	0.268273
Iossifov2014:0006 Iossifov2014_FMRPTargets	int771:chr1:156403681..156474119	chr1:156413512..156540634	4209	MEF2D	0.268273
Iossifov2014:0006 Iossifov2014_FMRPTargets	int89:chr12:132417451..132571956	chr12:132309278..132585011	8408,57634	ULK1,EP400	0.268273
Iossifov2014:0006 Iossifov2014_FMRPTargets	int123,int408,int72:chr16:2014130..2289455	chr16:2027989..2460747	7249,5310,57524,21	TSC2,PKD1,CASKIN1,ABCA3	0.268273
Iossifov2014:0006 Iossifov2014_FMRPTargets	int110,int650:chr1:43970956..44369444	chr1:44342477..44453694	9670	IPO13	0.268273
Iossifov2014:0006 Iossifov2014_FMRPTargets	int180:chr5:32461803..32493382	chr5:32334455..32514844	51663	ZFR	0.268273
Iossifov2014:0006 Iossifov2014_FMRPTargets	int546:chr19:51134298..51152949	chr19:51145083..51290195	50944	SHANK1	0.268273
Iossifov2014:0006 Iossifov2014_FMRPTargets	int437,int428,int5,int514:chr6:43082651..43396608	chr6:43079921..43275997	23113,84630	CUL9,TTBK1	0.268273
Iossifov2014:0006 Iossifov2014_FMRPTargets	int436:chr22:20031102..20162758	chr22:19937401..20074309	421	ARVCF	0.268273
Iossifov2014:0006 Iossifov2014_FMRPTargets	int713:chr13:67306783..67472713	chr13:66856965..67874468	5101	PCDH9	0.268273
Iossifov2014:0006 Iossifov2014_FMRPTargets	int724:chr17:1627704..1657899	chr17:1533922..1658176	10594	PRPF8	0.268273
Iossifov2014:0006 Iossifov2014_FMRPTargets	int997:chr12:125097041..125097710	chr12:124788956..125122010	9612	NCOR2	0.268273
Iossifov2014:0006 Iossifov2014_FMRPTargets	int622,int181:chr7:70071979..70257129	chr7:68993904..70278054	26053	AUTS2	0.268273
Iossifov2014:0006 Iossifov2014_FMRPTargets	int110,int650:chr1:43970956..44369444	chr1:43926546..44109343	5792	PTPRF	0.268273
Iossifov2014:0006 Iossifov2014_FMRPTargets	int618,int77:chr2:98998983..100146146	chr2:100143715..100829037	3899	AFF3	0.268273
Iossifov2014:0006 Iossifov2014_FMRPTargets	int898:chr15:62874445..62911117	chr15:62869509..63156829	83660	TLN2	0.268273
Iossifov2014:0006 Iossifov2014_FMRPTargets	int871:chr19:47969394..48115083	chr19:47911278..48045307	6543	SLC8A2	0.268273
Iossifov2014:0006 Iossifov2014_FMRPTargets	int689:chr3:35676532..35775455	chr3:35610665..35855988	10777	ARPP21	0.268273
Iossifov2014:0006 Iossifov2014_FMRPTargets	int831,int240,int846:chr5:16762024..16827737	chr5:16642015..17006385	4651	MYO10	0.268273
Iossifov2014:0006 Iossifov2014_FMRPTargets	int518:chr14:79681303..79767060	chr14:78800073..80354633	9369	NRXN3	0.268273
Iossifov2014:0006 Iossifov2014_FMRPTargets	int106,int182,int348:chr10:103804114..104209407	chr10:103935254..104249691	8729,5662	GBF1,PSD	0.268273
Iossifov2014:0006 Iossifov2014_FMRPTargets	int511,int162:chr21:41451731..41512161	chr21:41364342..42289039	1826	DSCAM	0.268273
Iossifov2014:0006 Iossifov2014_FMRPTargets	int108,int353:chr19:49451217..49659014	chr19:49552645..49674287	8541	PPFIA3	0.268273
Iossifov2014:0006 Iossifov2014_FMRPTargets	int640,int663:chr17:28733862..29738071	chr17:29351944..29724695	4763	NF1	0.268273
Iossifov2014:0006 Iossifov2014_FMRPTargets	int916:chr17:42009211..42272586	chr17:42134120..42271014	10014	HDAC5	0.268273
Iossifov2014:0006 Iossifov2014_FMRPTargets	int360:chr12:110060137..110740470	chr12:110649031..110808897	488	ATP2A2	0.268273
Iossifov2014:0006 Iossifov2014_FMRPTargets	int172,int492:chr14:24662857..24721665	chr14:24629424..24728124	79711	IPO4	0.268273
Iossifov2014:0006 Iossifov2014_FMRPTargets	int652,int424,int424,int85,int458:chr17:48396110..48647011	chr17:48568428..48724832	8913	CACNA1G	0.268273
Iossifov2014:0006 Iossifov2014_FMRPTargets	int206:chr12:53716133..53929672	chr12:53854275..53963444	7786	MAP3K12	0.268273
Iossifov2014:0006 Iossifov2014_FMRPTargets	int660:chr16:24099496..24106227	chr16:23777299..24251932	5579	PRKCB	0.268273
Iossifov2014:0006 Iossifov2014_FMRPTargets	int781:chr1:46615056..46892812	chr1:46724071..46839038	10489	LRRC41	0.268273
Iossifov2014:0006 Iossifov2014_FMRPTargets	int309,int456,int686:chr9:9209799..9440297	chr9:8294245..10682723	5789	PTPRD	0.268273
Iossifov2014:0006 Iossifov2014_FMRPTargets	int399:chr8:19987914..19987914	chr8:19984703..20099207	526	ATP6V1B2	0.268273
Iossifov2014:0006 Iossifov2014_FMRPTargets	int126:chr1:42274619..42350417	chr1:41952035..42454378	59269	HIVEP3	0.268273
Iossifov2014:0006 Iossifov2014_FMRPTargets	int36:chr1:37202097..37261085	chr1:37241127..37569844	2899	GRIK3	0.268273
Iossifov2014:0006 Iossifov2014_FMRPTargets	int183:chr3:47588649..48326433	chr3:47774398..48200769	22907,4134	DHX30,MAP4	0.268273
Iossifov2014:0006 Iossifov2014_FMRPTargets	int651:chr18:43617872..43716475	chr18:43644109..43754199	498	ATP5A1	0.268273
Iossifov2014:0006 Iossifov2014_FMRPTargets	int391:chr2:237021346..237136992	chr2:236332732..237060444	116987	AGAP1	0.268273
Iossifov2014:0006 Iossifov2014_FMRPTargets	int284:chr15:70428667..70434356	chr15:70320129..70460256	7090	TLE3	0.268273
Iossifov2014:0006 Iossifov2014_FMRPTargets	int341,int67,int535:chr10:61562977..61808880	chr10:61766055..62563284	288	ANK3	0.268273
Iossifov2014:0006 Iossifov2014_FMRPTargets	int275,int488,int178,int78,int259,int715,int886,int432,int23,int598,int745,int325,int196:chr8:8088877..11886722	chr8:9343444..9659856	8658	TNKS	0.268273
Iossifov2014:0006 Iossifov2014_FMRPTargets	int487,int578:chr5:166984363..167900328	chr5:167649064..167919308	23286	WWC1	0.268273
Iossifov2014:0006 Iossifov2014_FMRPTargets	int474:chr2:222225453..222272013	chr2:222262746..222508922	2043	EPHA4	0.268273
Iossifov2014:0006 Iossifov2014_FMRPTargets	int589:chr17:43507403..44672951	chr17:44598034..44854828	4905	NSF	0.268273
Iossifov2014:0006 Iossifov2014_FMRPTargets	int986:chr4:146748044..146821410	chr4:146658778..146930112	152485	ZNF827	0.268273
Iossifov2014:0006 Iossifov2014_FMRPTargets	int170:chr14:73343471..73717433	chr14:73416152..73563920	53349	ZFYVE1	0.268273
Iossifov2014:0006 Iossifov2014_FMRPTargets	int150:chr13:111719291..111780597	chr13:111697623..111978081	8874	ARHGEF7	0.268273
Iossifov2014:0006 Iossifov2014_FMRPTargets	int268:chr7:77862252..77953248	chr7:77626373..79152890	9863	MAGI2	0.268273
Iossifov2014:0006 Iossifov2014_FMRPTargets	int471:chr12:51983427..52209780	chr12:51715100..52226648	9498,6334	SLC4A8,SCN8A	0.268273
Iossifov2014:0006 Iossifov2014_FMRPTargets	int296,int629,int961:chr10:78778734..79019060	chr10:78609358..79467577	3778	KCNMA1	0.268273
Iossifov2014:0006 Iossifov2014_FMRPTargets	int852:chr1:89847153..90065293	chr1:89920396..90083420	23507	LRRC8B	0.268273
Iossifov2014:0006 Iossifov2014_FMRPTargets	int618,int77:chr2:98998983..100146146	chr2:98991320..99227496	3631	INPP4A	0.268273
Iossifov2014:0006 Iossifov2014_FMRPTargets	int681:chr9:129954016..130076801	chr9:129955940..130175828	84253	GARNL3	0.268273
Iossifov2014:0006 Iossifov2014_FMRPTargets	int294:chr21:38458048..38598090	chr21:38375570..38595408	7267	TTC3	0.268273
Iossifov2014:0006 Iossifov2014_FMRPTargets	int118:chr4:160185669..160355746	chr4:160118997..160301301	9693	RAPGEF2	0.268273
Iossifov2014:0006 Iossifov2014_FMRPTargets	int546:chr19:51134298..51152949	chr19:51000149..51141302	94030	LRRC4B	0.268273
Iossifov2014:0006 Iossifov2014_FMRPTargets	int730:chr20:37020978..37240766	chr20:37031448..37227504	57148	RALGAPB	0.268273
Iossifov2014:0006 Iossifov2014_FMRPTargets	int926:chr1:156647931..156655253	chr1:156541739..156649324	63827	BCAN	0.268273
Iossifov2014:0006 Iossifov2014_FMRPTargets	int996,int913:chr1:210939131..211643017	chr1:210831656..211377457	3756	KCNH1	0.268273
Iossifov2014:0006 Iossifov2014_FMRPTargets	int847,int470:chr4:186491772..186859331	chr4:186486597..186947870	8470	SORBS2	0.268273
Iossifov2014:0006 Iossifov2014_FMRPTargets	int990:chr2:202613635..202666254	chr2:202544985..202715895	57679	ALS2	0.268273
Iossifov2014:0006 Iossifov2014_FMRPTargets	int562:chr17:10035379..10035379	chr17:9793925..10171868	8522	GAS7	0.268273
Iossifov2014:0006 Iossifov2014_FMRPTargets	int941:chr2:101451819..101498230	chr2:101366612..101633287	4862	NPAS2	0.268273
Iossifov2014:0006 Iossifov2014_FMRPTargets	int15,int62,int95,int225:chr9:119138164..119529014	chr9:119379580..119483579	22954	TRIM32	0.268273
Iossifov2014:0006 Iossifov2014_FMRPTargets	int710,int81:chr15:54355939..54400068	chr15:54235100..54940806	440279	UNC13C	0.268273
Iossifov2014:0006 Iossifov2014_FMRPTargets	int676:chr11:35399975..35403124	chr11:35252751..35511610	6506	SLC1A2	0.268273
Iossifov2014:0006 Iossifov2014_FMRPTargets	int987,int495:chr10:80878219..80972653	chr10:80758791..81096285	57178	ZMIZ1	0.268273
Iossifov2014:0006 Iossifov2014_FMRPTargets	int701:chr2:173620465..173716172	chr2:173530524..173937620	11069	RAPGEF4	0.268273
Iossifov2014:0006 Iossifov2014_FMRPTargets	int143:chr15:52811815..52811815	chr15:52579479..52891247	4644	MYO5A	0.268273
Iossifov2014:0006 Iossifov2014_FMRPTargets	int528:chr2:230618034..230870007	chr2:230608552..230856725	9320	TRIP12	0.268273
Iossifov2014:0006 Iossifov2014_FMRPTargets	int520:chr1:116906839..116948712	chr1:116845794..116967396	476	ATP1A1	0.268273
Iossifov2014:0006 Iossifov2014_FMRPTargets	int210:chr6:16714217..16753147	chr6:16279342..16831721	6310	ATXN1	0.268273
Parikshak2013:0003 Parikshak2013_M03	int165:chr6:53590928..53829104	chr6:53589777..53808919	55227	LRRC1	0.281172
Parikshak2013:0003 Parikshak2013_M03	int89:chr12:132417451..132571956	chr12:132558971..132657018	79050	NOC4L	0.281172
Parikshak2013:0003 Parikshak2013_M03	int631,int222,int501:chr2:62905539..64334456	chr2:63207191..63304966	5013	OTX1	0.281172
Parikshak2013:0003 Parikshak2013_M03	int571,int445:chr7:5862648..5983553	chr7:5562435..5891361	6624,54476	FSCN1,RNF216	0.281172
Parikshak2013:0003 Parikshak2013_M03	int377:chr19:52838968..52883416	chr19:52769497..52890376	162963	ZNF610	0.281172
Parikshak2013:0003 Parikshak2013_M03	int807,int254:chr3:50058610..50412945	chr3:50335220..50448367	8692,11186	HYAL2,RASSF1	0.281172
Parikshak2013:0003 Parikshak2013_M03	int114:chr14:92544769..92639767	chr14:92518297..92650543	53981	CPSF2	0.281172
Parikshak2013:0003 Parikshak2013_M03	int360:chr12:110060137..110740470	chr12:110492139..110676600	28981	IFT81	0.281172
Parikshak2013:0003 Parikshak2013_M03	int364:chr7:1877501..2247496	chr7:2211856..2310780	4521	NUDT1	0.281172
Parikshak2013:0003 Parikshak2013_M03	int954:chr2:27281034..27934711	chr2:27370257..27486660	790	CAD	0.281172
Parikshak2013:0003 Parikshak2013_M03	int803,int176:chr2:162193238..162878404	chr2:162202619..162301573	10716	TBR1	0.281172
Parikshak2013:0003 Parikshak2013_M03	int275,int488,int178,int78,int259,int715,int886,int432,int23,int598,int745,int325,int196:chr8:8088877..11886722	chr8:8790313..8910849	90459	ERI1	0.281172
Parikshak2013:0003 Parikshak2013_M03	int790:chr5:145467826..145674091	chr5:145513162..145688784	54439	RBM27	0.281172
Parikshak2013:0003 Parikshak2013_M03	int51:chr1:77899667..78819970	chr1:78008100..78219112	26009	ZZZ3	0.281172
Parikshak2013:0003 Parikshak2013_M03	int622,int181:chr7:70071979..70257129	chr7:68993904..70278054	26053	AUTS2	0.281172
Parikshak2013:0003 Parikshak2013_M03	int807,int254:chr3:50058610..50412945	chr3:50122847..50246508	6405	SEMA3F	0.281172
Parikshak2013:0003 Parikshak2013_M03	int912:chr7:4952056..5007993	chr7:4877368..4971625	56903	PAPOLB	0.281172
Parikshak2013:0003 Parikshak2013_M03	int108,int353:chr19:49451217..49659014	chr19:49451381..49566610	2997	GYS1	0.281172
Parikshak2013:0003 Parikshak2013_M03	int485:chr14:77496619..77532343	chr14:77470885..77565042	64207	IRF2BPL	0.281172
Parikshak2013:0003 Parikshak2013_M03	int995:chr6:149813940..150180259	chr6:149896010..150137708	11104,348995	KATNA1,NUP43	0.281172
Parikshak2013:0003 Parikshak2013_M03	int781:chr1:46615056..46892812	chr1:46485811..46712167	8503	PIK3R3	0.281172
Parikshak2013:0003 Parikshak2013_M03	int560:chr12:56455524..56462323	chr12:56442003..56653351	84872,6601	ZC3H10,SMARCC2	0.281172
Parikshak2013:0003 Parikshak2013_M03	int548:chr3:134113349..134341297	chr3:134134574..134313855	80254	CEP63	0.281172
Parikshak2013:0003 Parikshak2013_M03	int387:chr9:101858054..101931740	chr9:101797370..101936473	7046	TGFBR1	0.281172
Parikshak2013:0003 Parikshak2013_M03	int641:chr18:32622168..32926744	chr18:32811021..32994431	100101467,7572	ZSCAN30,ZNF24	0.281172
Parikshak2013:0003 Parikshak2013_M03	int817:chr1:234765989..234789591	chr1:234720014..234815271	359948	IRF2BP2	0.281172
Parikshak2013:0003 Parikshak2013_M03	int890:chr22:24194941..24204630	chr22:24059149..24196705	6598	SMARCB1	0.281172
Parikshak2013:0003 Parikshak2013_M03	int478:chr20:21056805..21246620	chr20:21213941..21390463	22803	XRN2	0.281172
Parikshak2013:0003 Parikshak2013_M03	int275,int488,int178,int78,int259,int715,int886,int432,int23,int598,int745,int325,int196:chr8:8088877..11886722	chr8:9343444..9659856	8658	TNKS	0.281172
Parikshak2013:0003 Parikshak2013_M03	int25,int92:chr12:3890095..4001019	chr12:3898026..4052614	57097	PARP11	0.281172
Parikshak2013:0003 Parikshak2013_M03	int376:chr9:14366507..14373886	chr9:14061841..14468982	4781	NFIB	0.281172
Parikshak2013:0003 Parikshak2013_M03	int954:chr2:27281034..27934711	chr2:27528715..27649901	2976	GTF3C2	0.281172
Parikshak2013:0003 Parikshak2013_M03	int410:chr11:115432255..115476687	chr11:115024344..115445241	23705	CADM1	0.281172
Parikshak2013:0003 Parikshak2013_M03	int974:chr8:41723550..41935324	chr8:41766996..41979544	7994	KAT6A	0.281172
Parikshak2013:0003 Parikshak2013_M03	int570,int466:chr3:155585172..156005151	chr3:155518324..155675520	8833	GMPS	0.281172
Parikshak2013:0003 Parikshak2013_M03	int834,int232:chr10:97050555..97725111	chr10:97345685..97486567	5832	ALDH18A1	0.281172
Parikshak2013:0003 Parikshak2013_M03	int128,int398,int525,int610:chr7:148305430..148645341	chr7:148484463..148651441	2146	EZH2	0.281172
Parikshak2013:0003 Parikshak2013_M03	int206:chr12:53716133..53929672	chr12:53681239..53894946	8086,5094	AAAS,PCBP2	0.281172
Parikshak2013:0003 Parikshak2013_M03	int172,int492:chr14:24662857..24721665	chr14:24629424..24850576	79711,161424,27141	IPO4,NOP9,CIDEB	0.281172
Parikshak2013:0003 Parikshak2013_M03	int724:chr17:1627704..1657899	chr17:1533922..1658176	10594	PRPF8	0.281172
Parikshak2013:0003 Parikshak2013_M03	int437,int428,int5,int514:chr6:43082651..43396608	chr6:42985354..43091683	9820	CUL7	0.281172
Parikshak2013:0003 Parikshak2013_M03	int904,int37:chr21:33776671..33867280	chr21:33663329..33835312	9875	URB1	0.281172
Parikshak2013:0003 Parikshak2013_M03	int822:chr2:72395464..73084166	chr2:73074603..73182020	2016	EMX1	0.281172
Parikshak2013:0003 Parikshak2013_M03	int875:chr1:54352928..54352928	chr1:54341998..54453841	115353	LRRC42	0.281172
Parikshak2013:0003 Parikshak2013_M03	int651:chr18:43617872..43716475	chr18:43614297..43728299	115106	HAUS1	0.281172
Parikshak2013:0003 Parikshak2013_M03	int136:chr14:64229305..64474121	chr14:64249682..64713167	23224	SYNE2	0.281172
Parikshak2013:0003 Parikshak2013_M03	int527:chr1:182693381..182751046	chr1:182738438..182877117	1660	DHX9	0.281172
Parikshak2013:0003 Parikshak2013_M03	int123,int408,int72:chr16:2014130..2289455	chr16:1952063..2158713	10607,7249	TBL3,TSC2	0.281172
Parikshak2013:0003 Parikshak2013_M03	int73:chr19:7636751..7731619	chr19:7664410..7764439	56949	XAB2	0.281172
Parikshak2013:0003 Parikshak2013_M03	int905:chr5:136989278..137171477	chr5:137067072..137160039	10949	HNRNPA0	0.281172
Parikshak2013:0003 Parikshak2013_M03	int462:chr11:44106142..44285857	chr11:44047098..44286980	2132	EXT2	0.281172
Parikshak2013:0003 Parikshak2013_M03	int806:chr18:74030680..74061749	chr18:74049636..74277146	9658	ZNF516	0.281172
Parikshak2013:0003 Parikshak2013_M03	int183:chr3:47588649..48326433	chr3:47607377..47893405	6599	SMARCC1	0.281172
Parikshak2013:0003 Parikshak2013_M03	int545:chr10:91369885..91593216	chr10:91391346..91554700	9585	KIF20B	0.281172
Parikshak2013:0003 Parikshak2013_M03	int762:chr1:116407240..116651984	chr1:116358998..116453747	4808	NHLH2	0.281172
Parikshak2013:0003 Parikshak2013_M03	int292:chr13:114138733..114302622	chr13:114169055..114315788	7027	TFDP1	0.281172
Parikshak2013:0003 Parikshak2013_M03	int106,int182,int348:chr10:103804114..104209407	chr10:103847324..103950210	8861	LDB1	0.281172
Parikshak2013:0003 Parikshak2013_M03	int385:chr14:56521676..56591404	chr14:56515092..56788031	57161	PELI2	0.281172
Parikshak2013:0003 Parikshak2013_M03	int185,int420:chr1:29186719..29593410	chr1:29454249..29578637	6429	SRSF4	0.281172
Uddin2014:0001 Uddin2014_BRAIN_CRITICAL	int277:chr2:208542914..208560343	chr2:208425354..208560055	151194	METTL21A	0.325367
Uddin2014:0001 Uddin2014_BRAIN_CRITICAL	int822:chr2:72395464..73084166	chr2:72336366..72444991	56603	CYP26B1	0.325367
Uddin2014:0001 Uddin2014_BRAIN_CRITICAL	int847,int470:chr4:186491772..186859331	chr4:186486597..186947870	8470	SORBS2	0.325367
Uddin2014:0001 Uddin2014_BRAIN_CRITICAL	int251:chr18:20897698..21368907	chr18:20855978..21087925	85019	TMEM241	0.325367
Uddin2014:0001 Uddin2014_BRAIN_CRITICAL	int341,int67,int535:chr10:61562977..61808880	chr10:61528505..61736414	8030	CCDC6	0.325367
Uddin2014:0001 Uddin2014_BRAIN_CRITICAL	int730:chr20:37020978..37240766	chr20:37031448..37227504	57148	RALGAPB	0.325367
Uddin2014:0001 Uddin2014_BRAIN_CRITICAL	int735:chr11:122751060..122751060	chr11:122639205..122763347	56253	CRTAM	0.325367
Uddin2014:0001 Uddin2014_BRAIN_CRITICAL	int484:chr11:17938556..18162945	chr11:17789595..18104709	26297	SERGEF	0.325367
Uddin2014:0001 Uddin2014_BRAIN_CRITICAL	int779:chr12:50271497..50281414	chr12:50240678..50367760	23017	FAIM2	0.325367
Uddin2014:0001 Uddin2014_BRAIN_CRITICAL	int352:chr2:166415099..166422010	chr2:165924029..166565917	6328,6326,80034	SCN3A,SCN2A,CSRNP3	0.325367
Uddin2014:0001 Uddin2014_BRAIN_CRITICAL	int17:chr20:5029207..5042089	chr20:4813001..5060939	9962	SLC23A2	0.325367
Uddin2014:0001 Uddin2014_BRAIN_CRITICAL	int198,int315,int22:chr20:14696013..14913496	chr20:13906145..16053841	140733	MACROD2	0.325367
Uddin2014:0001 Uddin2014_BRAIN_CRITICAL	int897:chr17:49630076..49694162	chr17:49687673..50307377	56934	CA10	0.325367
Uddin2014:0001 Uddin2014_BRAIN_CRITICAL	int618,int77:chr2:98998983..100146146	chr2:99996937..100176480	51455	REV1	0.325367
Uddin2014:0001 Uddin2014_BRAIN_CRITICAL	int905:chr5:136989278..137171477	chr5:136933188..137160039	26249,10949	KLHL3,HNRNPA0	0.325367
Uddin2014:0001 Uddin2014_BRAIN_CRITICAL	int113,int998:chr4:72510..498459	chr4:413772..562960	170960	ZNF721	0.325367
Uddin2014:0001 Uddin2014_BRAIN_CRITICAL	int518:chr14:79681303..79767060	chr14:78800073..80354633	9369	NRXN3	0.325367
Uddin2014:0001 Uddin2014_BRAIN_CRITICAL	int471:chr12:51983427..52209780	chr12:51715100..52226648	9498,6334	SLC4A8,SCN8A	0.325367
Uddin2014:0001 Uddin2014_BRAIN_CRITICAL	int990:chr2:202613635..202666254	chr2:202544985..202715895	57679	ALS2	0.325367
Uddin2014:0001 Uddin2014_BRAIN_CRITICAL	int377:chr19:52838968..52883416	chr19:52831120..52941657	84436	ZNF528	0.325367
Uddin2014:0001 Uddin2014_BRAIN_CRITICAL	int468:chr2:233465847..233523617	chr2:233492014..233745289	26058	GIGYF2	0.325367
Uddin2014:0001 Uddin2014_BRAIN_CRITICAL	int15,int62,int95,int225:chr9:119138164..119529014	chr9:119167503..120247317	23245	ASTN2	0.325367
Uddin2014:0001 Uddin2014_BRAIN_CRITICAL	int8,int750:chr11:132912844..132936734	chr11:132264874..133472403	4978	OPCML	0.325367
Uddin2014:0001 Uddin2014_BRAIN_CRITICAL	int974:chr8:41723550..41935324	chr8:41490743..41824280	286	ANK1	0.325367
Uddin2014:0001 Uddin2014_BRAIN_CRITICAL	int391:chr2:237021346..237136992	chr2:236332732..237060444	116987	AGAP1	0.325367
Uddin2014:0001 Uddin2014_BRAIN_CRITICAL	int773:chr11:131582093..131606071	chr11:131170370..132226716	50863	NTM	0.325367
Uddin2014:0001 Uddin2014_BRAIN_CRITICAL	int946:chr11:9964346..10331664	chr11:9780213..10385754	81846	SBF2	0.325367
Uddin2014:0001 Uddin2014_BRAIN_CRITICAL	int114:chr14:92544769..92639767	chr14:92504895..92642965	4287	ATXN3	0.325367
Uddin2014:0001 Uddin2014_BRAIN_CRITICAL	int400:chr2:3313428..3381189	chr2:3313445..3503342	51112	TRAPPC12	0.325367
Uddin2014:0001 Uddin2014_BRAIN_CRITICAL	int985:chr1:240300129..240300129	chr1:240185184..240658489	56776	FMN2	0.325367
Uddin2014:0001 Uddin2014_BRAIN_CRITICAL	int192,int981:chr3:10281647..10510287	chr3:10345706..10617268	491	ATP2B2	0.325367
Uddin2014:0001 Uddin2014_BRAIN_CRITICAL	int170:chr14:73343471..73717433	chr14:73533142..73710399	5663	PSEN1	0.325367
Uddin2014:0001 Uddin2014_BRAIN_CRITICAL	int996,int913:chr1:210939131..211643017	chr1:210831656..211509725	3756,55758	KCNH1,RCOR3	0.325367
Uddin2014:0001 Uddin2014_BRAIN_CRITICAL	int437,int428,int5,int514:chr6:43082651..43396608	chr6:43079921..43212325	23113	CUL9	0.325367
Uddin2014:0001 Uddin2014_BRAIN_CRITICAL	int350,int877:chr2:141959134..142485218	chr2:140968995..142959270	53353	LRP1B	0.325367
Uddin2014:0001 Uddin2014_BRAIN_CRITICAL	int51:chr1:77899667..78819970	chr1:78141673..78295564	23032	USP33	0.325367
Uddin2014:0001 Uddin2014_BRAIN_CRITICAL	int265:chr5:130655526..131539255	chr5:131265666..131417761	23305	ACSL6	0.325367
Uddin2014:0001 Uddin2014_BRAIN_CRITICAL	int923,int643:chr1:169651770..170054087	chr1:169870469..170113879	22920	KIFAP3	0.325367
Uddin2014:0001 Uddin2014_BRAIN_CRITICAL	int618,int77:chr2:98998983..100146146	chr2:98991320..99417589	3631,493753,11320	INPP4A,COA5,MGAT4A	0.325367
Uddin2014:0001 Uddin2014_BRAIN_CRITICAL	int872:chr3:65307541..65327414	chr3:65319905..66094509	9223	MAGI1	0.325367
Uddin2014:0001 Uddin2014_BRAIN_CRITICAL	int979:chr10:26160650..26484154	chr10:26435235..26613491	2572	GAD2	0.325367
Uddin2014:0001 Uddin2014_BRAIN_CRITICAL	int689:chr3:35676532..35775455	chr3:35610665..35855988	10777	ARPP21	0.325367
Uddin2014:0001 Uddin2014_BRAIN_CRITICAL	int425:chr15:23091857..23116232	chr15:23023278..23156843	123606	NIPA1	0.325367
Uddin2014:0001 Uddin2014_BRAIN_CRITICAL	int480:chr8:104212025..104212025	chr8:104082920..104262533	79870	BAALC	0.325367
Uddin2014:0001 Uddin2014_BRAIN_CRITICAL	int550:chr1:112566033..112597493	chr1:112298453..112601777	3752	KCND3	0.325367
Uddin2014:0001 Uddin2014_BRAIN_CRITICAL	int211:chr20:44779565..44813304	chr20:44782371..45105271	64405,63916	CDH22,ELMO2	0.325367
Uddin2014:0001 Uddin2014_BRAIN_CRITICAL	int622,int181:chr7:70071979..70257129	chr7:68993904..70278054	26053	AUTS2	0.325367
Uddin2014:0001 Uddin2014_BRAIN_CRITICAL	int896:chr4:140664444..140676533	chr4:140617545..141145233	55534	MAML3	0.325367
Uddin2014:0001 Uddin2014_BRAIN_CRITICAL	int926:chr1:156647931..156655253	chr1:156519085..156649324	60484,63827	HAPLN2,BCAN	0.325367
Uddin2014:0001 Uddin2014_BRAIN_CRITICAL	int54,int55:chr4:93452066..94157778	chr4:93155549..94715706	2895	GRID2	0.325367
Uddin2014:0001 Uddin2014_BRAIN_CRITICAL	int681:chr9:129954016..130076801	chr9:129607052..130175828	9649,84253	RALGPS1,GARNL3	0.325367
Uddin2014:0001 Uddin2014_BRAIN_CRITICAL	int183:chr3:47588649..48326433	chr3:47583727..47691730	10675	CSPG5	0.325367
Uddin2014:0001 Uddin2014_BRAIN_CRITICAL	int954:chr2:27281034..27934711	chr2:27581472..27685124	29959	NRBP1	0.325367
Uddin2014:0001 Uddin2014_BRAIN_CRITICAL	int236:chr16:66874574..66874574	chr16:66734798..66934879	1783,8883	DYNC1LI2,NAE1	0.325367
Uddin2014:0001 Uddin2014_BRAIN_CRITICAL	int143:chr15:52811815..52811815	chr15:52579479..52891247	4644	MYO5A	0.325367
Uddin2014:0001 Uddin2014_BRAIN_CRITICAL	int652,int424,int424,int85,int458:chr17:48396110..48647011	chr17:48568428..48724832	8913	CACNA1G	0.325367
Uddin2014:0001 Uddin2014_BRAIN_CRITICAL	int320:chr1:13954726..13956807	chr1:13956734..14171574	7799	PRDM2	0.325367
Uddin2014:0001 Uddin2014_BRAIN_CRITICAL	int969:chr8:2827474..2911322	chr8:2772874..4922328	64478	CSMD1	0.325367
Uddin2014:0001 Uddin2014_BRAIN_CRITICAL	int479,int84:chr2:38947554..39173570	chr2:38950740..39048636	6432	SRSF7	0.325367
Uddin2014:0001 Uddin2014_BRAIN_CRITICAL	int269:chr19:55010778..55012790	chr19:54890339..55044894	114823,94059	LENG8,LENG9	0.325367
Uddin2014:0001 Uddin2014_BRAIN_CRITICAL	int451:chr15:81484720..81484720	chr15:81419218..81625104	3603	IL16	0.325367
Uddin2014:0001 Uddin2014_BRAIN_CRITICAL	int279,int278:chr22:32977782..33041767	chr22:32888539..33524377	8224	SYN3	0.325367
Uddin2014:0001 Uddin2014_BRAIN_CRITICAL	int585:chr6:69130024..69782518	chr6:69275631..70119403	577	ADGRB3	0.325367
Uddin2014:0001 Uddin2014_BRAIN_CRITICAL	int341,int67,int535:chr10:61562977..61808880	chr10:61766055..62563284	288	ANK3	0.325367
Uddin2014:0001 Uddin2014_BRAIN_CRITICAL	int785:chr8:38014429..38316849	chr8:38112560..38309790	54904	WHSC1L1	0.325367
Uddin2014:0001 Uddin2014_BRAIN_CRITICAL	int89:chr12:132417451..132571956	chr12:132364464..132585011	57634	EP400	0.325367
Uddin2014:0001 Uddin2014_BRAIN_CRITICAL	int329:chr19:39475140..39545986	chr19:39494662..39622128	126433,390928	FBXO27,PAPL	0.325367
Uddin2014:0001 Uddin2014_BRAIN_CRITICAL	int899:chr17:11190747..11234195	chr17:11074739..11487380	388336	SHISA6	0.325367
Uddin2014:0001 Uddin2014_BRAIN_CRITICAL	int631,int222,int501:chr2:62905539..64334456	chr2:64099666..64316214	51542	VPS54	0.325367
Uddin2014:0001 Uddin2014_BRAIN_CRITICAL	int185,int420:chr1:29186719..29593410	chr1:29143602..29520421	2035,399474	EPB41,TMEM200B	0.325367
Uddin2014:0001 Uddin2014_BRAIN_CRITICAL	int129:chr2:77119035..77358977	chr2:76954849..77819502	80059	LRRTM4	0.325367
Uddin2014:0001 Uddin2014_BRAIN_CRITICAL	int803,int176:chr2:162193238..162878404	chr2:162410844..162861786	57282	SLC4A10	0.325367
Uddin2014:0001 Uddin2014_BRAIN_CRITICAL	int436:chr22:20031102..20162758	chr22:19937401..20155530	421,54487,29801	ARVCF,DGCR8,ZDHHC8	0.325367
Uddin2014:0001 Uddin2014_BRAIN_CRITICAL	int713:chr13:67306783..67472713	chr13:66856965..67874468	5101	PCDH9	0.325367
Uddin2014:0001 Uddin2014_BRAIN_CRITICAL	int123,int408,int72:chr16:2014130..2289455	chr16:2118710..2460747	5310,25837,64223,1877,57524,21	PKD1,RAB26,MLST8,E4F1,CASKIN1,ABCA3	0.325367
Uddin2014:0001 Uddin2014_BRAIN_CRITICAL	int382:chr7:6646145..6646145	chr7:6547064..6648610	55146	ZDHHC4	0.325367
Uddin2014:0001 Uddin2014_BRAIN_CRITICAL	int646:chr7:147754924..147812966	chr7:145743452..148138088	26047	CNTNAP2	0.325367
Uddin2014:0001 Uddin2014_BRAIN_CRITICAL	int762:chr1:116407240..116651984	chr1:116449118..116632675	55356	SLC22A15	0.325367
Uddin2014:0001 Uddin2014_BRAIN_CRITICAL	int833:chr8:82689212..82873063	chr8:82593565..82703539	79752	ZFAND1	0.325367
Uddin2014:0001 Uddin2014_BRAIN_CRITICAL	int544:chr7:37532418..37737176	chr7:36872510..37558929	9844	ELMO1	0.325367
Uddin2014:0001 Uddin2014_BRAIN_CRITICAL	int546:chr19:51134298..51152949	chr19:51105233..51290195	84258,50944	SYT3,SHANK1	0.325367
Uddin2014:0001 Uddin2014_BRAIN_CRITICAL	int443:chr13:113745941..113745941	chr13:113553534..113774053	23263	MCF2L	0.325367
Uddin2014:0001 Uddin2014_BRAIN_CRITICAL	int210:chr6:16714217..16753147	chr6:16279342..16831721	6310	ATXN1	0.325367
Uddin2014:0001 Uddin2014_BRAIN_CRITICAL	int135,int45,int386:chr3:70900385..71194680	chr3:70983864..71703140	27086	FOXP1	0.325367
Uddin2014:0001 Uddin2014_BRAIN_CRITICAL	int183:chr3:47588649..48326433	chr3:48212595..48332479	51385	ZNF589	0.325367
Uddin2014:0001 Uddin2014_BRAIN_CRITICAL	int807,int254:chr3:50058610..50412945	chr3:50380043..50611675	9254	CACNA2D2	0.325367
Uddin2014:0001 Uddin2014_BRAIN_CRITICAL	int528:chr2:230618034..230870007	chr2:230202344..230856725	92737,9320	DNER,TRIP12	0.325367
Uddin2014:0001 Uddin2014_BRAIN_CRITICAL	int106,int182,int348:chr10:103804114..104209407	chr10:104142373..104249691	5662	PSD	0.325367
Uddin2014:0001 Uddin2014_BRAIN_CRITICAL	int954:chr2:27281034..27934711	chr2:27853675..27956707	9913	SUPT7L	0.325367
Uddin2014:0001 Uddin2014_BRAIN_CRITICAL	int782:chr7:24509698..24611183	chr7:24542964..24753322	51678	MPP6	0.325367
Uddin2014:0001 Uddin2014_BRAIN_CRITICAL	int589:chr17:43507403..44672951	chr17:44598034..44854828	4905	NSF	0.325367
Uddin2014:0001 Uddin2014_BRAIN_CRITICAL	int29:chr6:89388023..89633046	chr6:89299615..89743348	8732	RNGTT	0.325367
Uddin2014:0001 Uddin2014_BRAIN_CRITICAL	int527:chr1:182693381..182751046	chr1:182595791..182712067	85397	RGS8	0.325367
Uddin2014:0001 Uddin2014_BRAIN_CRITICAL	int722:chr3:1114303..1114366	chr3:1064341..1465292	27255	CNTN6	0.325367
Uddin2014:0001 Uddin2014_BRAIN_CRITICAL	int589:chr17:43507403..44672951	chr17:43791645..44125699	1394,4137	CRHR1,MAPT	0.325367
Uddin2014:0001 Uddin2014_BRAIN_CRITICAL	int309,int456,int686:chr9:9209799..9440297	chr9:8294245..10682723	5789	PTPRD	0.325367
Uddin2014:0001 Uddin2014_BRAIN_CRITICAL	int572:chr1:64940492..64998457	chr1:64866475..65178741	57685	CACHD1	0.325367
Uddin2014:0001 Uddin2014_BRAIN_CRITICAL	int410:chr11:115432255..115476687	chr11:115024344..115445241	23705	CADM1	0.325367
Uddin2014:0001 Uddin2014_BRAIN_CRITICAL	int265:chr5:130655526..131539255	chr5:130739613..131040929	51735	RAPGEF6	0.325367
Uddin2014:0001 Uddin2014_BRAIN_CRITICAL	int205:chr16:75152826..75211347	chr16:75112420..75226132	162239	ZFP1	0.325367
Uddin2014:0001 Uddin2014_BRAIN_CRITICAL	int780:chr17:6368336..6437583	chr17:6334582..6529877	83394	PITPNM3	0.325367
Uddin2014:0001 Uddin2014_BRAIN_CRITICAL	int108,int353:chr19:49451217..49659014	chr19:49552645..49674287	8541	PPFIA3	0.325367
Uddin2014:0001 Uddin2014_BRAIN_CRITICAL	int771:chr1:156403681..156474119	chr1:156354054..156469184	10485	C1ORF61	0.325367
Uddin2014:0001 Uddin2014_BRAIN_CRITICAL	int543:chr15:72097992..73161393	chr15:72557067..72682525	60677	CELF6	0.325367
Uddin2014:0001 Uddin2014_BRAIN_CRITICAL	int917:chr21:40505513..40839630	chr21:40537403..40755712	54014	BRWD1	0.325367
Uddin2014:0001 Uddin2014_BRAIN_CRITICAL	int389:chr1:230540900..230619350	chr1:230437391..230631674	79605	PGBD5	0.325367
Uddin2014:0001 Uddin2014_BRAIN_CRITICAL	int524,int169,int177,int40:chr17:72839130..73534485	chr17:72818161..73021892	2905,30850	GRIN2C,CDR2L	0.325367
Uddin2014:0001 Uddin2014_BRAIN_CRITICAL	int340:chr12:117999874..118004024	chr12:117870816..118476028	283455	KSR2	0.325367
Uddin2014:0001 Uddin2014_BRAIN_CRITICAL	int270:chr15:57244382..57244382	chr15:57140832..57600730	6938	TCF12	0.325367
Uddin2014:0001 Uddin2014_BRAIN_CRITICAL	int187:chr11:124406100..124446589	chr11:124422741..124525822	84897	TBRG1	0.325367
Uddin2014:0001 Uddin2014_BRAIN_CRITICAL	int292:chr13:114138733..114302622	chr13:114169055..114315788	7027	TFDP1	0.325367
Uddin2014:0001 Uddin2014_BRAIN_CRITICAL	int570,int466:chr3:155585172..156005151	chr3:155768336..156276927	7881	KCNAB1	0.325367
Uddin2014:0001 Uddin2014_BRAIN_CRITICAL	int462:chr11:44106142..44285857	chr11:44047098..44286980	2132	EXT2	0.325367
Uddin2014:0001 Uddin2014_BRAIN_CRITICAL	int360:chr12:110060137..110740470	chr12:110347606..110575500	9815,400073	GIT2,C12ORF76	0.325367
Uddin2014:0001 Uddin2014_BRAIN_CRITICAL	int24:chr12:101279586..101373845	chr12:101118373..101542419	121601	ANO4	0.325367
Uddin2014:0001 Uddin2014_BRAIN_CRITICAL	int172,int492:chr14:24662857..24721665	chr14:24571233..24669463	9985	REC8	0.325367
Uddin2014:0001 Uddin2014_BRAIN_CRITICAL	int614,int260:chr1:158981187..159074762	chr1:159071376..159192932	57863	CADM3	0.325367
Uddin2014:0001 Uddin2014_BRAIN_CRITICAL	int38:chr10:35878148..35909646	chr10:35465908..35881598	219771	CCNY	0.325367
Uddin2014:0001 Uddin2014_BRAIN_CRITICAL	int183:chr3:47588649..48326433	chr3:47872179..48200769	4134	MAP4	0.325367
Uddin2014:0001 Uddin2014_BRAIN_CRITICAL	int21,int366:chr3:153587256..154132927	chr3:153973456..154112286	170506	DHX36	0.325367
Uddin2014:0001 Uddin2014_BRAIN_CRITICAL	int924:chr7:154554896..154565111	chr7:153514181..154706000	1804	DPP6	0.325367
Uddin2014:0001 Uddin2014_BRAIN_CRITICAL	int383:chr7:104524092..105087973	chr7:104584636..104774532	55904	KMT2E	0.325367
Uddin2014:0001 Uddin2014_BRAIN_CRITICAL	int693:chr5:139191665..139207494	chr5:139105405..139244048	84249	PSD2	0.325367
Uddin2014:0001 Uddin2014_BRAIN_CRITICAL	int657:chr6:44852734..45396544	chr6:44774466..45415788	8464	SUPT3H	0.325367
Uddin2014:0001 Uddin2014_BRAIN_CRITICAL	int586:chr17:71174027..71255954	chr17:71091159..71188062	6752	SSTR2	0.325367
Uddin2014:0001 Uddin2014_BRAIN_CRITICAL	int829:chr6:38338015..38342083	chr6:38116226..38677924	114781	BTBD9	0.325367
Uddin2014:0001 Uddin2014_BRAIN_CRITICAL	int995:chr6:149813940..150180259	chr6:149959288..150109392	9113	LATS1	0.325367
Uddin2014:0001 Uddin2014_BRAIN_CRITICAL	int688:chr22:36910391..36941780	chr22:36936915..37168690	10369	CACNG2	0.325367
Uddin2014:0001 Uddin2014_BRAIN_CRITICAL	int631,int222,int501:chr2:62905539..64334456	chr2:62830985..63293621	23301	EHBP1	0.325367
Uddin2014:0001 Uddin2014_BRAIN_CRITICAL	int343:chr1:231334780..231346779	chr1:231228673..231377314	440730	TRIM67	0.325367
Uddin2014:0001 Uddin2014_BRAIN_CRITICAL	int415:chr9:79456175..79467292	chr9:79206291..79591003	158471	PRUNE2	0.325367
Uddin2014:0001 Uddin2014_BRAIN_CRITICAL	int145:chr5:126546576..126631791	chr5:126556455..126816910	84466	MEGF10	0.325367
Uddin2014:0001 Uddin2014_BRAIN_CRITICAL	int39,int109:chr5:179601491..179617225	chr5:179507794..179789071	255426,5601	RASGEF1C,MAPK9	0.325367
Uddin2014:0001 Uddin2014_BRAIN_CRITICAL	int86,int919:chr16:6656073..7604361	chr16:5999131..7783340	54715	RBFOX1	0.325367
Uddin2014:0001 Uddin2014_BRAIN_CRITICAL	int661:chr12:31799621..31801645	chr12:31515156..31813952	160518	DENND5B	0.325367
Uddin2014:0001 Uddin2014_BRAIN_CRITICAL	int640,int663:chr17:28733862..29738071	chr17:28635941..28816675	1362	CPD	0.325367
Uddin2014:0001 Uddin2014_BRAIN_CRITICAL	int170:chr14:73343471..73717433	chr14:73066003..73430824	8110	DPF3	0.325367
Uddin2014:0001 Uddin2014_BRAIN_CRITICAL	int592,int906:chr1:242546333..242564007	chr1:242231688..242757998	200150	PLD5	0.325367
Uddin2014:0001 Uddin2014_BRAIN_CRITICAL	int797:chr2:160325291..160465641	chr2:160072303..160543112	151525,29994	WDSUB1,BAZ2B	0.325367
Uddin2014:0001 Uddin2014_BRAIN_CRITICAL	int708:chr12:108320634..108475893	chr12:108453247..108664313	9671	WSCD2	0.325367
Uddin2014:0001 Uddin2014_BRAIN_CRITICAL	int916:chr17:42009211..42272586	chr17:42262400..42511235	7343,10900,284069	UBTF,RUNDC3A,FAM171A2	0.325367
Uddin2014:0001 Uddin2014_BRAIN_CRITICAL	int118:chr4:160185669..160355746	chr4:160118997..160301301	9693	RAPGEF2	0.325367
Uddin2014:0001 Uddin2014_BRAIN_CRITICAL	int268:chr7:77862252..77953248	chr7:77626373..79152890	9863	MAGI2	0.325367
Uddin2014:0001 Uddin2014_BRAIN_CRITICAL	int770:chr3:3022997..3023000	chr3:2070549..3119645	152330	CNTN4	0.325367
Uddin2014:0001 Uddin2014_BRAIN_CRITICAL	int701:chr2:173620465..173716172	chr2:173530524..173937620	11069	RAPGEF4	0.325367
Uddin2014:0001 Uddin2014_BRAIN_CRITICAL	int150:chr13:111719291..111780597	chr13:111697623..111978081	8874	ARHGEF7	0.325367
Uddin2014:0001 Uddin2014_BRAIN_CRITICAL	int213:chr5:171260919..171274885	chr5:171268555..171503877	23291	FBXW11	0.325367
Uddin2014:0001 Uddin2014_BRAIN_CRITICAL	int640,int663:chr17:28733862..29738071	chr17:29351944..29885236	4763,84440	NF1,RAB11FIP4	0.325367
Uddin2014:0001 Uddin2014_BRAIN_CRITICAL	int359,int140:chr10:49842179..49902125	chr10:49444681..49930561	5599,58504	MAPK8,ARHGAP22	0.325367
Uddin2014:0001 Uddin2014_BRAIN_CRITICAL	int900,int732:chr1:66983920..67221552	chr1:66929251..67236822	84251	SGIP1	0.325367
Uddin2014:0001 Uddin2014_BRAIN_CRITICAL	int305:chr8:80582607..80582607	chr8:80453048..80598410	11075	STMN2	0.325367
Uddin2014:0001 Uddin2014_BRAIN_CRITICAL	int615:chr7:63757160..64210052	chr7:64184765..64314059	7697	ZNF138	0.325367
Uddin2014:0001 Uddin2014_BRAIN_CRITICAL	int275,int488,int178,int78,int259,int715,int886,int432,int23,int598,int745,int325,int196:chr8:8088877..11886722	chr8:10733656..11205654	286046,66036	XKR6,MTMR9	0.325367
Uddin2014:0001 Uddin2014_BRAIN_CRITICAL	int206:chr12:53716133..53929672	chr12:53854275..53963444	7786	MAP3K12	0.325367
Uddin2014:0001 Uddin2014_BRAIN_CRITICAL	int449:chr3:107823224..108545856	chr3:108238336..108433693	9666	DZIP3	0.325367
Samocha2014:0001 Samocha2014_CONSTRAINED	int557:chr17:65060773..65276451	chr17:65046553..65311319	9931	HELZ	0.331967
Samocha2014:0001 Samocha2014_CONSTRAINED	int916:chr17:42009211..42272586	chr17:42012031..42106436	162417	NAGS	0.331967
Samocha2014:0001 Samocha2014_CONSTRAINED	int545:chr10:91369885..91593216	chr10:91319253..91475329	53354	PANK1	0.331967
Samocha2014:0001 Samocha2014_CONSTRAINED	int192,int981:chr3:10281647..10510287	chr3:10345706..10617268	491	ATP2B2	0.331967
Samocha2014:0001 Samocha2014_CONSTRAINED	int528:chr2:230618034..230870007	chr2:230608552..230856725	9320	TRIP12	0.331967
Samocha2014:0001 Samocha2014_CONSTRAINED	int38:chr10:35878148..35909646	chr10:35907176..36000362	8325	FZD8	0.331967
Samocha2014:0001 Samocha2014_CONSTRAINED	int916:chr17:42009211..42272586	chr17:42262400..42368250	7343	UBTF	0.331967
Samocha2014:0001 Samocha2014_CONSTRAINED	int275,int488,int178,int78,int259,int715,int886,int432,int23,int598,int745,int325,int196:chr8:8088877..11886722	chr8:10733656..11128875	286046	XKR6	0.331967
Samocha2014:0001 Samocha2014_CONSTRAINED	int835,int632:chr3:143499552..143872124	chr3:143620639..143731210	205428	C3ORF58	0.331967
Samocha2014:0001 Samocha2014_CONSTRAINED	int520:chr1:116906839..116948712	chr1:116845794..116967396	476	ATP1A1	0.331967
Samocha2014:0001 Samocha2014_CONSTRAINED	int724:chr17:1627704..1657899	chr17:1533922..1658176	10594	PRPF8	0.331967
Samocha2014:0001 Samocha2014_CONSTRAINED	int296,int629,int961:chr10:78778734..79019060	chr10:78609358..79467577	3778	KCNMA1	0.331967
Samocha2014:0001 Samocha2014_CONSTRAINED	int807,int254:chr3:50058610..50412945	chr3:50056340..50334602	10181,6405,7869	RBM5,SEMA3F,SEMA3B	0.331967
Samocha2014:0001 Samocha2014_CONSTRAINED	int322:chr11:114040325..114092582	chr11:113860430..114141397	7704	ZBTB16	0.331967
Samocha2014:0001 Samocha2014_CONSTRAINED	int108,int353:chr19:49451217..49659014	chr19:49427155..49539182	10856	RUVBL2	0.331967
Samocha2014:0001 Samocha2014_CONSTRAINED	int427:chr5:176998497..177106718	chr5:176918577..177013967	51428	DDX41	0.331967
Samocha2014:0001 Samocha2014_CONSTRAINED	int954:chr2:27281034..27934711	chr2:27370257..27486660	790	CAD	0.331967
Samocha2014:0001 Samocha2014_CONSTRAINED	int267:chr10:48391129..48449237	chr10:48405787..48509138	2662	GDF10	0.331967
Samocha2014:0001 Samocha2014_CONSTRAINED	int660:chr16:24099496..24106227	chr16:23777299..24393737	5579,10368	PRKCB,CACNG3	0.331967
Samocha2014:0001 Samocha2014_CONSTRAINED	int206:chr12:53716133..53929672	chr12:53854275..53963444	7786	MAP3K12	0.331967
Samocha2014:0001 Samocha2014_CONSTRAINED	int699:chr16:8968067..9079252	chr16:8965950..9127341	7874	USP7	0.331967
Samocha2014:0001 Samocha2014_CONSTRAINED	int487,int578:chr5:166984363..167900328	chr5:166641842..167711162	57451	TENM2	0.331967
Samocha2014:0001 Samocha2014_CONSTRAINED	int425:chr15:23091857..23116232	chr15:22822648..23156843	23191,123606	CYFIP1,NIPA1	0.331967
Samocha2014:0001 Samocha2014_CONSTRAINED	int437,int428,int5,int514:chr6:43082651..43396608	chr6:43069032..43169244	6722	SRF	0.331967
Samocha2014:0001 Samocha2014_CONSTRAINED	int589:chr17:43507403..44672951	chr17:44598034..44854828	4905	NSF	0.331967
Samocha2014:0001 Samocha2014_CONSTRAINED	int108,int353:chr19:49451217..49659014	chr19:49552645..49674287	8541	PPFIA3	0.331967
Samocha2014:0001 Samocha2014_CONSTRAINED	int170:chr14:73343471..73717433	chr14:73455220..73608076	58517	RBM25	0.331967
Samocha2014:0001 Samocha2014_CONSTRAINED	int128,int398,int525,int610:chr7:148305430..148645341	chr7:148325932..148651441	8454,2146	CUL1,EZH2	0.331967
Samocha2014:0001 Samocha2014_CONSTRAINED	int905:chr5:136989278..137171477	chr5:137067072..137160039	10949	HNRNPA0	0.331967
Samocha2014:0001 Samocha2014_CONSTRAINED	int673:chr16:87858245..87879163	chr16:87843628..87973100	8140	SLC7A5	0.331967
Samocha2014:0001 Samocha2014_CONSTRAINED	int803,int176:chr2:162193238..162878404	chr2:162410844..162861786	57282	SLC4A10	0.331967
Samocha2014:0001 Samocha2014_CONSTRAINED	int284:chr15:70428667..70434356	chr15:70320129..70460256	7090	TLE3	0.331967
Samocha2014:0001 Samocha2014_CONSTRAINED	int73:chr19:7636751..7731619	chr19:7529037..7764439	10908,57662,56949	PNPLA6,CAMSAP3,XAB2	0.331967
Samocha2014:0001 Samocha2014_CONSTRAINED	int118:chr4:160185669..160355746	chr4:160118997..160301301	9693	RAPGEF2	0.331967
Samocha2014:0001 Samocha2014_CONSTRAINED	int183:chr3:47588649..48326433	chr3:47607377..47911686	6599,22907	SMARCC1,DHX30	0.331967
Samocha2014:0001 Samocha2014_CONSTRAINED	int378:chr15:96835281..96866320	chr15:96799156..96903492	7026	NR2F2	0.331967
Samocha2014:0001 Samocha2014_CONSTRAINED	int106,int182,int348:chr10:103804114..104209407	chr10:104109570..104202893	79176	FBXL15	0.331967
Samocha2014:0001 Samocha2014_CONSTRAINED	int485:chr14:77496619..77532343	chr14:77470885..77565042	64207	IRF2BPL	0.331967
Samocha2014:0001 Samocha2014_CONSTRAINED	int652,int424,int424,int85,int458:chr17:48396110..48647011	chr17:48568428..48724832	8913	CACNA1G	0.331967
Samocha2014:0001 Samocha2014_CONSTRAINED	int511,int162:chr21:41451731..41512161	chr21:41364342..42289039	1826	DSCAM	0.331967
Samocha2014:0001 Samocha2014_CONSTRAINED	int544:chr7:37532418..37737176	chr7:36872510..37558929	9844	ELMO1	0.331967
Samocha2014:0001 Samocha2014_CONSTRAINED	int527:chr1:182693381..182751046	chr1:182738438..182877117	1660	DHX9	0.331967
Samocha2014:0001 Samocha2014_CONSTRAINED	int618,int77:chr2:98998983..100146146	chr2:98991320..99227496	3631	INPP4A	0.331967
Samocha2014:0001 Samocha2014_CONSTRAINED	int803,int176:chr2:162193238..162878404	chr2:162202619..162301573	10716	TBR1	0.331967
Samocha2014:0001 Samocha2014_CONSTRAINED	int106,int182,int348:chr10:103804114..104209407	chr10:103969945..104071231	5309	PITX3	0.331967
Samocha2014:0001 Samocha2014_CONSTRAINED	int871:chr19:47969394..48115083	chr19:47911278..48045307	6543	SLC8A2	0.331967
Samocha2014:0001 Samocha2014_CONSTRAINED	int785:chr8:38014429..38316849	chr8:38112560..38309790	54904	WHSC1L1	0.331967
Samocha2014:0001 Samocha2014_CONSTRAINED	int890:chr22:24194941..24204630	chr22:24059149..24196705	6598	SMARCB1	0.331967
Samocha2014:0001 Samocha2014_CONSTRAINED	int985:chr1:240300129..240300129	chr1:240185184..240658489	56776	FMN2	0.331967
Samocha2014:0001 Samocha2014_CONSTRAINED	int471:chr12:51983427..52209780	chr12:51715100..52226648	9498,6334	SLC4A8,SCN8A	0.331967
Samocha2014:0001 Samocha2014_CONSTRAINED	int825:chr14:63292605..63510678	chr14:63153290..63581956	27133	KCNH5	0.331967
Samocha2014:0001 Samocha2014_CONSTRAINED	int546:chr19:51134298..51152949	chr19:51145083..51290195	50944	SHANK1	0.331967
Samocha2014:0001 Samocha2014_CONSTRAINED	int107,int35:chr15:47716150..48050095	chr15:47406402..48086420	80031	SEMA6D	0.331967
Samocha2014:0001 Samocha2014_CONSTRAINED	int987,int495:chr10:80878219..80972653	chr10:80758791..81096285	57178	ZMIZ1	0.331967
Samocha2014:0001 Samocha2014_CONSTRAINED	int358:chr1:192991783..193429853	chr1:193021087..193243942	79577	CDC73	0.331967
Samocha2014:0001 Samocha2014_CONSTRAINED	int150:chr13:111719291..111780597	chr13:111697623..111978081	8874	ARHGEF7	0.331967
Samocha2014:0001 Samocha2014_CONSTRAINED	int123,int408,int72:chr16:2014130..2289455	chr16:2207183..2316465	57524	CASKIN1	0.331967
Samocha2014:0001 Samocha2014_CONSTRAINED	int809:chr12:52268138..52334814	chr12:52275450..52410863	91	ACVR1B	0.331967
Samocha2014:0001 Samocha2014_CONSTRAINED	int579:chr17:60743806..60752388	chr17:60486385..60790962	11011,9902	TLK2,MRC2	0.331967
Samocha2014:0001 Samocha2014_CONSTRAINED	int550:chr1:112566033..112597493	chr1:112298453..112601777	3752	KCND3	0.331967
Samocha2014:0001 Samocha2014_CONSTRAINED	int340:chr12:117999874..118004024	chr12:117870816..118476028	283455	KSR2	0.331967
Samocha2014:0001 Samocha2014_CONSTRAINED	int543:chr15:72097992..73161393	chr15:72696666..72898896	25820	ARIH1	0.331967
Samocha2014:0001 Samocha2014_CONSTRAINED	int640,int663:chr17:28733862..29738071	chr17:29351944..29724695	4763	NF1	0.331967
Samocha2014:0001 Samocha2014_CONSTRAINED	int143:chr15:52811815..52811815	chr15:52579479..52891247	4644	MYO5A	0.331967
Samocha2014:0001 Samocha2014_CONSTRAINED	int861,int395:chr19:4856287..4872275	chr19:4833091..4982165	29128	UHRF1	0.331967
Samocha2014:0001 Samocha2014_CONSTRAINED	int360:chr12:110060137..110740470	chr12:110649031..110808897	488	ATP2A2	0.331967
Samocha2014:0001 Samocha2014_CONSTRAINED	int947:chr21:28392015..28541902	chr21:28270230..28409439	11096	ADAMTS5	0.331967
Samocha2014:0001 Samocha2014_CONSTRAINED	int983,int302,int623,int669:chr1:151833831..152141922	chr1:152058792..152157930	7062	TCHH	0.331967
Samocha2014:0001 Samocha2014_CONSTRAINED	int185,int420:chr1:29186719..29593410	chr1:29068653..29210208	4985	OPRD1	0.331967
Samocha2014:0001 Samocha2014_CONSTRAINED	int546:chr19:51134298..51152949	chr19:51000149..51141302	94030	LRRC4B	0.331967
Samocha2014:0001 Samocha2014_CONSTRAINED	int622,int181:chr7:70071979..70257129	chr7:68993904..70278054	26053	AUTS2	0.331967
Samocha2014:0001 Samocha2014_CONSTRAINED	int89:chr12:132417451..132571956	chr12:132364464..132585011	57634	EP400	0.331967
Samocha2014:0001 Samocha2014_CONSTRAINED	int688:chr22:36910391..36941780	chr22:36886896..37168690	8664,10369	EIF3D,CACNG2	0.331967
Sugathan2014:0003 Sugathan2014_M2	int683,int659:chr12:15368644..15669413	chr12:15405190..15771265	5800	PTPRO	0.340966
Sugathan2014:0003 Sugathan2014_M2	int39,int109:chr5:179601491..179617225	chr5:179507794..179706130	255426	RASGEF1C	0.340966
Sugathan2014:0003 Sugathan2014_M2	int719:chr6:63808931..64539397	chr6:64211916..64313493	7803	PTP4A1	0.340966
Sugathan2014:0003 Sugathan2014_M2	int25,int92:chr12:3890095..4001019	chr12:3898026..4052614	57097	PARP11	0.340966
Sugathan2014:0003 Sugathan2014_M2	int508:chr4:105967687..106034949	chr4:105997031..106220960	54790	TET2	0.340966
Sugathan2014:0003 Sugathan2014_M2	int165:chr6:53590928..53829104	chr6:53492698..53600506	401265	KLHL31	0.340966
Sugathan2014:0003 Sugathan2014_M2	int720:chr10:54072560..54116232	chr10:52680910..54078110	5592	PRKG1	0.340966
Sugathan2014:0003 Sugathan2014_M2	int113,int998:chr4:72510..498459	chr4:413772..562960	170960	ZNF721	0.340966
Sugathan2014:0003 Sugathan2014_M2	int379:chr3:133780030..134017219	chr3:133855977..134039586	6259	RYK	0.340966
Sugathan2014:0003 Sugathan2014_M2	int145:chr5:126546576..126631791	chr5:126556455..126816910	84466	MEGF10	0.340966
Sugathan2014:0003 Sugathan2014_M2	int468:chr2:233465847..233523617	chr2:233400766..233567491	80303	EFHD1	0.340966
Sugathan2014:0003 Sugathan2014_M2	int618,int77:chr2:98998983..100146146	chr2:99215568..99417589	11320	MGAT4A	0.340966
Sugathan2014:0003 Sugathan2014_M2	int265:chr5:130655526..131539255	chr5:130739613..131040929	51735	RAPGEF6	0.340966
Sugathan2014:0003 Sugathan2014_M2	int589:chr17:43507403..44672951	chr17:44087281..44372740	284058	KANSL1	0.340966
Sugathan2014:0003 Sugathan2014_M2	int154:chr16:20726949..20726949	chr16:20724985..20823286	55623	THUMPD1	0.340966
Sugathan2014:0003 Sugathan2014_M2	int793:chr6:89790564..89867561	chr6:89785768..89895288	135293	PM20D2	0.340966
Sugathan2014:0003 Sugathan2014_M2	int387:chr9:101858054..101931740	chr9:101797370..101936473	7046	TGFBR1	0.340966
Sugathan2014:0003 Sugathan2014_M2	int242:chr5:170284624..170694033	chr5:170218885..170747019	64901	RANBP17	0.340966
Sugathan2014:0003 Sugathan2014_M2	int113,int998:chr4:72510..498459	chr4:261595..387691	7700	ZNF141	0.340966
Sugathan2014:0003 Sugathan2014_M2	int999:chr17:9126903..9133394	chr17:8854858..9167317	9423	NTN1	0.340966
Sugathan2014:0003 Sugathan2014_M2	int41:chr1:236899343..236938860	chr1:236888580..237087281	4548	MTR	0.340966
Sugathan2014:0003 Sugathan2014_M2	int358:chr1:192991783..193429853	chr1:192958551..193080906	6738	TROVE2	0.340966
Sugathan2014:0003 Sugathan2014_M2	int185,int420:chr1:29186719..29593410	chr1:29425936..29520421	399474	TMEM200B	0.340966
Sugathan2014:0003 Sugathan2014_M2	int797:chr2:160325291..160465641	chr2:160155489..160543112	29994	BAZ2B	0.340966
Sugathan2014:0003 Sugathan2014_M2	int935:chr19:56837099..56879488	chr19:56845382..56974889	147949,147948	ZNF583,ZNF582	0.340966
Sugathan2014:0003 Sugathan2014_M2	int2,int666:chr6:46044196..46150542	chr6:46027700..46134436	22875	ENPP4	0.340966
Sugathan2014:0003 Sugathan2014_M2	int214:chr15:34106037..34158266	chr15:33533162..34178304	6263	RYR3	0.340966
Sugathan2014:0003 Sugathan2014_M2	int582,int347:chr10:97745894..97962767	chr10:97819471..97943517	9849	ZNF518A	0.340966
Sugathan2014:0003 Sugathan2014_M2	int215:chr6:113973847..114133862	chr6:114108513..114204652	4082	MARCKS	0.340966
Sugathan2014:0003 Sugathan2014_M2	int186,int306,int339,int46,int580:chr12:96089725..96302462	chr12:96031582..96254536	59277	NTN4	0.340966
Sugathan2014:0003 Sugathan2014_M2	int785:chr8:38014429..38316849	chr8:38112560..38309790	54904	WHSC1L1	0.340966
Sugathan2014:0003 Sugathan2014_M2	int779:chr12:50271497..50281414	chr12:50209825..50306912	144233	BCDIN3D	0.340966
Sugathan2014:0003 Sugathan2014_M2	int244:chr15:35341836..35395583	chr15:35250541..35350497	54989	ZNF770	0.340966
Sugathan2014:0003 Sugathan2014_M2	int822:chr2:72395464..73084166	chr2:73044511..73139289	6697	SPR	0.340966
Sugathan2014:0003 Sugathan2014_M2	int900,int732:chr1:66983920..67221552	chr1:66929251..67236822	84251	SGIP1	0.340966
Sugathan2014:0003 Sugathan2014_M2	int807,int254:chr3:50058610..50412945	chr3:50122847..50278411	6405,10991	SEMA3F,SLC38A3	0.340966
Sugathan2014:0003 Sugathan2014_M2	int489:chr15:61434751..61469322	chr15:60760482..61591502	6095	RORA	0.340966
Sugathan2014:0003 Sugathan2014_M2	int995:chr6:149813940..150180259	chr6:149959288..150109392	9113	LATS1	0.340966
Iossifov2014:0003 Iossifov2014_DeNovoLGDsInSchizoprenia	int546:chr19:51134298..51152949	chr19:51145083..51290195	50944	SHANK1	0.39956
Iossifov2014:0003 Iossifov2014_DeNovoLGDsInSchizoprenia	int582,int347:chr10:97745894..97962767	chr10:97931454..98101333	29760	BLNK	0.39956
Iossifov2014:0003 Iossifov2014_DeNovoLGDsInSchizoprenia	int849:chr1:98297731..98562260	chr1:97523299..98456615	1806	DPYD	0.39956
Iossifov2014:0003 Iossifov2014_DeNovoLGDsInSchizoprenia	int543:chr15:72097992..73161393	chr15:72032887..72130597	10002	NR2E3	0.39956
Iossifov2014:0003 Iossifov2014_DeNovoLGDsInSchizoprenia	int164:chr1:82220276..82539588	chr1:82095454..82478422	23266	ADGRL2	0.39956
Iossifov2014:0003 Iossifov2014_DeNovoLGDsInSchizoprenia	int890:chr22:24194941..24204630	chr22:24166564..24257409	4282	MIF	0.39956
Iossifov2014:0003 Iossifov2014_DeNovoLGDsInSchizoprenia	int126:chr1:42274619..42350417	chr1:41952035..42454378	59269	HIVEP3	0.39956
Iossifov2014:0003 Iossifov2014_DeNovoLGDsInSchizoprenia	int595:chr1:831489..872352	chr1:825966..921099	339451	KLHL17	0.39956
Iossifov2014:0003 Iossifov2014_DeNovoLGDsInSchizoprenia	int785:chr8:38014429..38316849	chr8:38019008..38140287	23259	DDHD2	0.39956
Parikshak2013:0015 Parikshak2013_M16	int641:chr18:32622168..32926744	chr18:32486891..32743432	10982	MAPRE2	0.40136
Parikshak2013:0015 Parikshak2013_M16	int570,int466:chr3:155585172..156005151	chr3:155460400..155594076	285315	C3ORF33	0.40136
Parikshak2013:0015 Parikshak2013_M16	int871:chr19:47969394..48115083	chr19:47911278..48088515	6543,8775	SLC8A2,NAPA	0.40136
Parikshak2013:0015 Parikshak2013_M16	int804:chr10:11959691..12107640	chr10:12101639..12231957	55176	SEC61A2	0.40136
Parikshak2013:0015 Parikshak2013_M16	int73:chr19:7636751..7731619	chr19:7529037..7646653	10908	PNPLA6	0.40136
Parikshak2013:0015 Parikshak2013_M16	int10,int115:chr9:124971170..124982500	chr9:124944855..125061091	26468	LHX6	0.40136
Parikshak2013:0015 Parikshak2013_M16	int954:chr2:27281034..27934711	chr2:27123238..27343619	22924,3795	MAPRE3,KHK	0.40136
Parikshak2013:0015 Parikshak2013_M16	int537,int523:chr6:162933134..163273912	chr6:161748589..163218834	5071	PARK2	0.40136
Parikshak2013:0015 Parikshak2013_M16	int341,int67,int535:chr10:61562977..61808880	chr10:61528505..61736414	8030	CCDC6	0.40136
Parikshak2013:0015 Parikshak2013_M16	int807,int254:chr3:50058610..50412945	chr3:50310258..50406899	8372	HYAL3	0.40136
Parikshak2013:0015 Parikshak2013_M16	int954:chr2:27281034..27934711	chr2:27816337..27937847	22950	SLC4A1AP	0.40136
Parikshak2013:0015 Parikshak2013_M16	int546:chr19:51134298..51152949	chr19:51105233..51213092	84258	SYT3	0.40136
Parikshak2013:0015 Parikshak2013_M16	int702:chr15:32995468..33062361	chr15:32863869..33009298	6447	SCG5	0.40136
Parikshak2013:0015 Parikshak2013_M16	int785:chr8:38014429..38316849	chr8:37964105..38090819	9530	BAG4	0.40136
Parikshak2013:0015 Parikshak2013_M16	int275,int488,int178,int78,int259,int715,int886,int432,int23,int598,int745,int325,int196:chr8:8088877..11886722	chr8:11071999..11205654	66036	MTMR9	0.40136
Parikshak2013:0015 Parikshak2013_M16	int995:chr6:149813940..150180259	chr6:150000830..150152557	5110	PCMT1	0.40136
Parikshak2013:0015 Parikshak2013_M16	int449:chr3:107823224..108545856	chr3:108238336..108433693	9666	DZIP3	0.40136
Parikshak2013:0015 Parikshak2013_M16	int786,int958,int612:chr2:31245804..31351249	chr2:31113330..31431592	79623	GALNT14	0.40136
Parikshak2013:0015 Parikshak2013_M16	int108,int353:chr19:49451217..49659014	chr19:49547617..49641717	64130	LIN7B	0.40136
Parikshak2013:0015 Parikshak2013_M16	int399:chr8:19987914..19987914	chr8:19984703..20099207	526	ATP6V1B2	0.40136
Parikshak2013:0015 Parikshak2013_M16	int590:chr18:55310072..55325982	chr18:55247893..55359177	4677	NARS	0.40136
Parikshak2013:0015 Parikshak2013_M16	int562:chr17:10035379..10035379	chr17:9793925..10171868	8522	GAS7	0.40136
Parikshak2013:0015 Parikshak2013_M16	int485:chr14:77496619..77532343	chr14:77494577..77603630	85457	CIPC	0.40136
Parikshak2013:0015 Parikshak2013_M16	int953:chr16:83692881..83756988	chr16:82590398..83866607	1012,3281	CDH13,HSBP1	0.40136
Parikshak2013:0015 Parikshak2013_M16	int383:chr7:104524092..105087973	chr7:104736820..105099377	6733	SRPK2	0.40136
Parikshak2013:0015 Parikshak2013_M16	int618,int77:chr2:98998983..100146146	chr2:98991320..99227496	3631	INPP4A	0.40136
Parikshak2013:0015 Parikshak2013_M16	int900,int732:chr1:66983920..67221552	chr1:66929251..67236822	84251	SGIP1	0.40136
Parikshak2013:0015 Parikshak2013_M16	int845:chr17:77152842..77160151	chr17:77065426..77582230	146713	RBFOX3	0.40136
Parikshak2013:0015 Parikshak2013_M16	int143:chr15:52811815..52811815	chr15:52579479..52891247	4644	MYO5A	0.40136
Parikshak2013:0015 Parikshak2013_M16	int771:chr1:156403681..156474119	chr1:156413512..156540634	4209	MEF2D	0.40136
Parikshak2013:0015 Parikshak2013_M16	int611,int483:chr15:90580008..90756292	chr15:90738894..90835443	51335	NGRN	0.40136
Parikshak2013:0015 Parikshak2013_M16	int589:chr17:43507403..44672951	chr17:44598034..44854828	4905	NSF	0.40136
Parikshak2013:0015 Parikshak2013_M16	int213:chr5:171260919..171274885	chr5:171268555..171503877	23291	FBXW11	0.40136
Parikshak2013:0015 Parikshak2013_M16	int614,int260:chr1:158981187..159074762	chr1:159071376..159192932	57863	CADM3	0.40136
Parikshak2013:0015 Parikshak2013_M16	int210:chr6:16714217..16753147	chr6:16279342..16831721	6310	ATXN1	0.40136
Parikshak2013:0015 Parikshak2013_M16	int876:chr12:31915159..32023666	chr12:31804070..31952108	196394	AMN1	0.40136
Parikshak2013:0015 Parikshak2013_M16	int150:chr13:111719291..111780597	chr13:111697623..111978081	8874	ARHGEF7	0.40136
Pinto2014:0006 Pinto2014_ID	int524,int169,int177,int40:chr17:72839130..73534485	chr17:73442608..73540820	283989	TSEN54	0.410559
Pinto2014:0006 Pinto2014_ID	int942:chr1:47687084..47997658	chr1:47695810..47849819	6491	STIL	0.410559
Pinto2014:0006 Pinto2014_ID	int543:chr15:72097992..73161393	chr15:72908519..73050817	585	BBS4	0.410559
Pinto2014:0006 Pinto2014_ID	int611,int483:chr15:90580008..90756292	chr15:90607210..90715786	3418	IDH2	0.410559
Pinto2014:0006 Pinto2014_ID	int586:chr17:71174027..71255954	chr17:71119172..71224645	9382	COG1	0.410559
Pinto2014:0006 Pinto2014_ID	int834,int232:chr10:97050555..97725111	chr10:97403152..97523900	26123	TCTN3	0.410559
Pinto2014:0006 Pinto2014_ID	int15,int62,int95,int225:chr9:119138164..119529014	chr9:119379580..119483579	22954	TRIM32	0.410559
Pinto2014:0006 Pinto2014_ID	int110,int650:chr1:43970956..44369444	chr1:44103203..44416837	6487	ST3GAL3	0.410559
Pinto2014:0006 Pinto2014_ID	int515,int566,int293,int133,int863,int342:chr2:239997710..240327863	chr2:239949863..240392643	9759	HDAC4	0.410559
Pinto2014:0006 Pinto2014_ID	int548:chr3:134113349..134341297	chr3:134134574..134313855	80254	CEP63	0.410559
Pinto2014:0006 Pinto2014_ID	int387:chr9:101858054..101931740	chr9:101797370..101936473	7046	TGFBR1	0.410559
Pinto2014:0006 Pinto2014_ID	int937,int75:chr3:33066986..33194990	chr3:33018099..33208694	2720	GLB1	0.410559
Pinto2014:0006 Pinto2014_ID	int128,int398,int525,int610:chr7:148305430..148645341	chr7:148484463..148651441	2146	EZH2	0.410559
Pinto2014:0006 Pinto2014_ID	int976:chr2:170274818..170578931	chr2:170266005..170383165	129880	BBS5	0.410559
Pinto2014:0006 Pinto2014_ID	int603:chr4:15395591..15499481	chr4:15401488..15623180	57545	CC2D2A	0.410559
Pinto2014:0006 Pinto2014_ID	int234:chr8:94306996..94698775	chr8:94697071..94850347	91147	TMEM67	0.410559
Pinto2014:0006 Pinto2014_ID	int890:chr22:24194941..24204630	chr22:24059149..24196705	6598	SMARCB1	0.410559
Pinto2014:0006 Pinto2014_ID	int724:chr17:1627704..1657899	chr17:1549816..1661893	124997	WDR81	0.410559
Parikshak2013:0002 Parikshak2013_M02	int524,int169,int177,int40:chr17:72839130..73534485	chr17:72913726..73021892	30850	CDR2L	0.435656
Parikshak2013:0002 Parikshak2013_M02	int954:chr2:27281034..27934711	chr2:27580097..27673611	130557	ZNF513	0.435656
Parikshak2013:0002 Parikshak2013_M02	int546:chr19:51134298..51152949	chr19:51000149..51141302	94030	LRRC4B	0.435656
Parikshak2013:0002 Parikshak2013_M02	int583:chr20:4008974..4008974	chr20:3892068..4066216	11237	RNF24	0.435656
Parikshak2013:0002 Parikshak2013_M02	int813:chr19:14792529..14864228	chr19:14730851..14864558	84449	ZNF333	0.435656
Parikshak2013:0002 Parikshak2013_M02	int508:chr4:105967687..106034949	chr4:105997031..106220960	54790	TET2	0.435656
Parikshak2013:0002 Parikshak2013_M02	int183:chr3:47588649..48326433	chr3:48212595..48332479	51385	ZNF589	0.435656
Parikshak2013:0002 Parikshak2013_M02	int437,int428,int5,int514:chr6:43082651..43396608	chr6:43283807..43494370	24149,65989	ZNF318,DLK2	0.435656
Parikshak2013:0002 Parikshak2013_M02	int776:chr19:6312290..6323207	chr19:6190391..6349959	4298	MLLT1	0.435656
Parikshak2013:0002 Parikshak2013_M02	int615:chr7:63757160..64210052	chr7:64184765..64314059	7697	ZNF138	0.435656
Parikshak2013:0002 Parikshak2013_M02	int987,int495:chr10:80878219..80972653	chr10:80758791..81096285	57178	ZMIZ1	0.435656
Parikshak2013:0002 Parikshak2013_M02	int211:chr20:44779565..44813304	chr20:44669625..44788580	57727	NCOA5	0.435656
Parikshak2013:0002 Parikshak2013_M02	int51:chr1:77899667..78819970	chr1:78394086..78514889	8880	FUBP1	0.435656
Parikshak2013:0002 Parikshak2013_M02	int719:chr6:63808931..64539397	chr6:64275706..64445418	23469	PHF3	0.435656
Parikshak2013:0002 Parikshak2013_M02	int137:chr7:72022225..72417063	chr7:72279905..72441979	9883	POM121	0.435656
Parikshak2013:0002 Parikshak2013_M02	int275,int488,int178,int78,int259,int715,int886,int432,int23,int598,int745,int325,int196:chr8:8088877..11886722	chr8:8621998..8821131	9258	MFHAS1	0.435656
Parikshak2013:0002 Parikshak2013_M02	int935:chr19:56837099..56879488	chr19:56845382..56956400	147949	ZNF583	0.435656
Parikshak2013:0002 Parikshak2013_M02	int436:chr22:20031102..20162758	chr22:19997754..20119400	54487	DGCR8	0.435656
Parikshak2013:0002 Parikshak2013_M02	int724:chr17:1627704..1657899	chr17:1549816..1661893	124997	WDR81	0.435656
Parikshak2013:0002 Parikshak2013_M02	int652,int424,int424,int85,int458:chr17:48396110..48647011	chr17:48486160..48583341	55316	RSAD1	0.435656
Parikshak2013:0002 Parikshak2013_M02	int871:chr19:47969394..48115083	chr19:48041452..48226534	29998	GLTSCR1	0.435656
Parikshak2013:0002 Parikshak2013_M02	int565:chr16:12585849..12611712	chr16:12000590..12688146	92017	SNX29	0.435656
Parikshak2013:0002 Parikshak2013_M02	int779:chr12:50271497..50281414	chr12:50164928..50292208	57701	NCKAP5L	0.435656
Parikshak2013:0002 Parikshak2013_M02	int106,int182,int348:chr10:103804114..104209407	chr10:103822750..103930090	23082	PPRC1	0.435656
Parikshak2013:0002 Parikshak2013_M02	int857:chr19:48690847..48697961	chr19:48603948..48720877	374920	C19ORF68	0.435656
Parikshak2013:0002 Parikshak2013_M02	int954:chr2:27281034..27934711	chr2:27729388..27825589	84226	C2ORF16	0.435656
Parikshak2013:0002 Parikshak2013_M02	int595:chr1:831489..872352	chr1:825966..921099	339451	KLHL17	0.435656
Parikshak2013:0002 Parikshak2013_M02	int589:chr17:43507403..44672951	chr17:44087281..44372740	284058	KANSL1	0.435656
Parikshak2013:0002 Parikshak2013_M02	int377:chr19:52838968..52883416	chr19:52597652..52849180	90317,162962,90321,147657	ZNF616,ZNF836,ZNF766,ZNF480	0.435656
Parikshak2013:0002 Parikshak2013_M02	int199:chr12:108034827..108139363	chr12:108106642..108224914	11108	PRDM4	0.435656
Parikshak2013:0002 Parikshak2013_M02	int511,int162:chr21:41451731..41512161	chr21:41364342..42289039	1826	DSCAM	0.435656
Parikshak2013:0002 Parikshak2013_M02	int392:chr19:821102..830621	chr19:757830..852017	566	AZU1	0.435656
Parikshak2013:0002 Parikshak2013_M02	int494:chr13:46514492..46658712	chr13:46516313..46696896	23091	ZC3H13	0.435656
Parikshak2013:0002 Parikshak2013_M02	int36:chr1:37202097..37261085	chr1:37241127..37569844	2899	GRIK3	0.435656
Parikshak2013:0002 Parikshak2013_M02	int413:chr4:165824574..165835223	chr4:165808099..165900273	152756	FAM218A	0.435656
Parikshak2013:0002 Parikshak2013_M02	int451:chr15:81484720..81484720	chr15:81419218..81686524	3603,80765	IL16,STARD5	0.435656
Parikshak2013:0002 Parikshak2013_M02	int123,int408,int72:chr16:2014130..2289455	chr16:2203488..2388413	1877,10921	E4F1,RNPS1	0.435656
Parikshak2013:0002 Parikshak2013_M02	int975:chr16:89106321..89132011	chr16:88921262..89113504	863	CBFA2T3	0.435656
Parikshak2013:0002 Parikshak2013_M02	int89:chr12:132417451..132571956	chr12:132309278..132585011	8408,57634	ULK1,EP400	0.435656
Parikshak2013:0002 Parikshak2013_M02	int543:chr15:72097992..73161393	chr15:72513521..72633628	56965	PARP6	0.435656
Parikshak2013:0002 Parikshak2013_M02	int383:chr7:104524092..105087973	chr7:104584636..104774532	55904	KMT2E	0.435656
Parikshak2013:0002 Parikshak2013_M02	int615:chr7:63757160..64210052	chr7:63704250..63837012	728927	ZNF736	0.435656
Parikshak2013:0002 Parikshak2013_M02	int618,int77:chr2:98998983..100146146	chr2:99996937..100176480	51455	REV1	0.435656
Parikshak2013:0002 Parikshak2013_M02	int543:chr15:72097992..73161393	chr15:72098360..72480440	4649	MYO9A	0.435656
Parikshak2013:0002 Parikshak2013_M02	int427:chr5:176998497..177106718	chr5:176926789..177051548	54540	FAM193B	0.435656
Parikshak2013:0002 Parikshak2013_M02	int896:chr4:140664444..140676533	chr4:140617545..141145233	55534	MAML3	0.435656
Iossifov2014:0002 Iossifov2014_ChromatinModifiers	int108,int353:chr19:49451217..49659014	chr19:49427155..49539182	10856	RUVBL2	0.471553
Iossifov2014:0002 Iossifov2014_ChromatinModifiers	int785:chr8:38014429..38316849	chr8:37893010..38017598	9070	ASH2L	0.471553
Iossifov2014:0002 Iossifov2014_ChromatinModifiers	int155:chr7:127263886..127788296	chr7:127222201..127752659	27044	SND1	0.471553
Iossifov2014:0002 Iossifov2014_ChromatinModifiers	int508:chr4:105967687..106034949	chr4:105997031..106220960	54790	TET2	0.471553
Iossifov2014:0002 Iossifov2014_ChromatinModifiers	int756:chr3:20191506..20373412	chr3:20011523..20215896	8850	KAT2B	0.471553
Iossifov2014:0002 Iossifov2014_ChromatinModifiers	int954:chr2:27281034..27934711	chr2:27853675..27956707	9913	SUPT7L	0.471553
Iossifov2014:0002 Iossifov2014_ChromatinModifiers	int711:chr7:18065193..18092793	chr7:18056571..19056992	9734	HDAC9	0.471553
Iossifov2014:0002 Iossifov2014_ChromatinModifiers	int199:chr12:108034827..108139363	chr12:108106642..108224914	11108	PRDM4	0.471553
Iossifov2014:0002 Iossifov2014_ChromatinModifiers	int916:chr17:42009211..42272586	chr17:42134120..42271014	10014	HDAC5	0.471553
Iossifov2014:0002 Iossifov2014_ChromatinModifiers	int89:chr12:132417451..132571956	chr12:132364464..132585011	57634	EP400	0.471553
Iossifov2014:0002 Iossifov2014_ChromatinModifiers	int170:chr14:73343471..73717433	chr14:73066003..73430824	8110	DPF3	0.471553
Iossifov2014:0002 Iossifov2014_ChromatinModifiers	int183:chr3:47588649..48326433	chr3:47607377..47893405	6599	SMARCC1	0.471553
Iossifov2014:0002 Iossifov2014_ChromatinModifiers	int122,int331:chr1:184737999..184945900	chr1:184944550..185091740	6045	RNF2	0.471553
Iossifov2014:0002 Iossifov2014_ChromatinModifiers	int691,int59:chr10:68988231..69896336	chr10:69574426..69698147	23411	SIRT1	0.471553
Iossifov2014:0002 Iossifov2014_ChromatinModifiers	int449:chr3:107823224..108545856	chr3:108238336..108433693	9666	DZIP3	0.471553
Iossifov2014:0002 Iossifov2014_ChromatinModifiers	int247:chr1:2944527..2990994	chr1:2915741..3375185	63976	PRDM16	0.471553
Iossifov2014:0002 Iossifov2014_ChromatinModifiers	int320:chr1:13954726..13956807	chr1:13956734..14171574	7799	PRDM2	0.471553
Iossifov2014:0002 Iossifov2014_ChromatinModifiers	int781:chr1:46615056..46892812	chr1:46643366..46764145	8438	RAD54L	0.471553
Iossifov2014:0002 Iossifov2014_ChromatinModifiers	int861,int395:chr19:4856287..4872275	chr19:4833091..5173608	29128,23030	UHRF1,KDM4B	0.471553
Iossifov2014:0002 Iossifov2014_ChromatinModifiers	int719:chr6:63808931..64539397	chr6:64275706..64445418	23469	PHF3	0.471553
Iossifov2014:0002 Iossifov2014_ChromatinModifiers	int797:chr2:160325291..160465641	chr2:160155489..160543112	29994	BAZ2B	0.471553
Iossifov2014:0002 Iossifov2014_ChromatinModifiers	int740,int957:chr12:130869054..130906479	chr12:130752432..130876877	9271	PIWIL1	0.471553
Iossifov2014:0002 Iossifov2014_ChromatinModifiers	int917:chr21:40505513..40839630	chr21:40537403..40791047	54014,3150	BRWD1,HMGN1	0.471553
Iossifov2014:0002 Iossifov2014_ChromatinModifiers	int128,int398,int525,int610:chr7:148305430..148645341	chr7:148484463..148651441	2146	EZH2	0.471553
Iossifov2014:0002 Iossifov2014_ChromatinModifiers	int785:chr8:38014429..38316849	chr8:38112560..38309790	54904	WHSC1L1	0.471553
Iossifov2014:0002 Iossifov2014_ChromatinModifiers	int657:chr6:44852734..45396544	chr6:44774466..45415788	8464	SUPT3H	0.471553
Iossifov2014:0002 Iossifov2014_ChromatinModifiers	int890:chr22:24194941..24204630	chr22:24059149..24196705	6598	SMARCB1	0.471553
Iossifov2014:0002 Iossifov2014_ChromatinModifiers	int515,int566,int293,int133,int863,int342:chr2:239997710..240327863	chr2:239949863..240392643	9759	HDAC4	0.471553
Iossifov2014:0002 Iossifov2014_ChromatinModifiers	int974:chr8:41723550..41935324	chr8:41766996..41979544	7994	KAT6A	0.471553
Iossifov2014:0002 Iossifov2014_ChromatinModifiers	int110,int650:chr1:43970956..44369444	chr1:44045796..44191189	9682	KDM4A	0.471553
Sugathan2014:0004 Sugathan2014_M3	int524,int169,int177,int40:chr17:72839130..73534485	chr17:72913726..73021892	30850	CDR2L	0.486851
Sugathan2014:0004 Sugathan2014_M3	int369,int465,int874:chr6:143919229..144207531	chr6:143859316..144172322	9749	PHACTR2	0.486851
Sugathan2014:0004 Sugathan2014_M3	int373:chr11:108478047..108497245	chr11:108465751..108831657	1662	DDX10	0.486851
Sugathan2014:0004 Sugathan2014_M3	int640,int663:chr17:28733862..29738071	chr17:29089701..29221778	51379	CRLF3	0.486851
Sugathan2014:0004 Sugathan2014_M3	int91,int574:chr11:35561328..35811024	chr11:35569734..35662421	24147	FJX1	0.486851
Sugathan2014:0004 Sugathan2014_M3	int436:chr22:20031102..20162758	chr22:19934522..20073449	128989	TANGO2	0.486851
Sugathan2014:0004 Sugathan2014_M3	int374:chr12:33451588..34844133	chr12:33508347..33662754	341359	SYT10	0.486851
Sugathan2014:0004 Sugathan2014_M3	int161:chr8:97529682..97543956	chr8:97435881..97644037	6383	SDC2	0.486851
Sugathan2014:0004 Sugathan2014_M3	int73:chr19:7636751..7731619	chr19:7529037..7646653	10908	PNPLA6	0.486851
Sugathan2014:0004 Sugathan2014_M3	int421:chr14:77062591..77167620	chr14:77158234..77269363	22846	VASH1	0.486851
Sugathan2014:0004 Sugathan2014_M3	int437,int428,int5,int514:chr6:43082651..43396608	chr6:43325291..43438163	89845	ABCC10	0.486851
Sugathan2014:0004 Sugathan2014_M3	int123,int408,int72:chr16:2014130..2289455	chr16:2135798..2248130	84231	TRAF7	0.486851
Sugathan2014:0004 Sugathan2014_M3	int690:chr22:38387223..38387224	chr22:38383261..38491708	9463	PICK1	0.486851
Sugathan2014:0004 Sugathan2014_M3	int637:chr11:2956783..3091788	chr11:2929502..3020650	7262	PHLDA2	0.486851
Sugathan2014:0004 Sugathan2014_M3	int51:chr1:77899667..78819970	chr1:78284199..78429578	91624	NEXN	0.486851
Sugathan2014:0004 Sugathan2014_M3	int631,int222,int501:chr2:62905539..64334456	chr2:63207191..63304966	5013	OTX1	0.486851
Sugathan2014:0004 Sugathan2014_M3	int524,int169,int177,int40:chr17:72839130..73534485	chr17:72674750..72855922	9368,54868	SLC9A3R1,TMEM104	0.486851
Sugathan2014:0004 Sugathan2014_M3	int611,int483:chr15:90580008..90756292	chr15:90753476..90847279	10519	CIB1	0.486851
Sugathan2014:0004 Sugathan2014_M3	int200:chr19:11220410..11257018	chr19:11130037..11378243	3949,25959	LDLR,KANK2	0.486851
Sugathan2014:0004 Sugathan2014_M3	int652,int424,int424,int85,int458:chr17:48396110..48647011	chr17:48353392..48458546	64132	XYLT2	0.486851
Sugathan2014:0004 Sugathan2014_M3	int524,int169,int177,int40:chr17:72839130..73534485	chr17:73451782..73591290	3993	LLGL2	0.486851
Sugathan2014:0004 Sugathan2014_M3	int427:chr5:176998497..177106718	chr5:176908905..177007427	79930	DOK3	0.486851
Sugathan2014:0004 Sugathan2014_M3	int571,int445:chr7:5862648..5983553	chr7:5639671..5891361	54476	RNF216	0.486851
Sugathan2014:0004 Sugathan2014_M3	int394,int794,int346,int87,int639:chr18:9478794..9988562	chr18:9843954..9980018	9218	VAPA	0.486851
Sugathan2014:0004 Sugathan2014_M3	int807,int254:chr3:50058610..50412945	chr3:50194119..50406852	2771,24142	GNAI2,NAT6	0.486851
Sugathan2014:0004 Sugathan2014_M3	int206:chr12:53716133..53929672	chr12:53623469..53720965	60314	C12ORF10	0.486851
Sugathan2014:0004 Sugathan2014_M3	int864:chr1:28244854..28290746	chr1:28215972..28314607	55113	XKR8	0.486851
Sugathan2014:0004 Sugathan2014_M3	int437,int428,int5,int514:chr6:43082651..43396608	chr6:43001766..43097283	51069	MRPL2	0.486851
Pinto2014:0004 Pinto2014_DAPPLE	int924:chr7:154554896..154565111	chr7:153514181..154706000	1804	DPP6	0.50115
Pinto2014:0004 Pinto2014_DAPPLE	int117:chr6:85211666..85516100	chr6:85422215..85543954	9096	TBX18	0.50115
Pinto2014:0004 Pinto2014_DAPPLE	int147:chr15:85173872..85452820	chr15:85074248..85186947	54993	ZSCAN2	0.50115
Pinto2014:0004 Pinto2014_DAPPLE	int258:chr13:24482512..24494811	chr13:24483764..24901212	221178	SPATA13	0.50115
Pinto2014:0004 Pinto2014_DAPPLE	int861,int395:chr19:4856287..4872275	chr19:4795935..4982165	148022,29128	TICAM1,UHRF1	0.50115
Pinto2014:0004 Pinto2014_DAPPLE	int123,int408,int72:chr16:2014130..2289455	chr16:2027989..2158713	7249	TSC2	0.50115
Pinto2014:0004 Pinto2014_DAPPLE	int917:chr21:40505513..40839630	chr21:40537403..40755712	54014	BRWD1	0.50115
Pinto2014:0004 Pinto2014_DAPPLE	int640,int663:chr17:28733862..29738071	chr17:29351944..29724695	4763	NF1	0.50115
Pinto2014:0004 Pinto2014_DAPPLE	int172,int492:chr14:24662857..24721665	chr14:24714743..24810833	5875	RABGGTA	0.50115
Pinto2014:0004 Pinto2014_DAPPLE	int609:chr5:75691606..75743907	chr5:75629079..76023957	10788	IQGAP2	0.50115
Pinto2014:0004 Pinto2014_DAPPLE	int756:chr3:20191506..20373412	chr3:19918571..20215896	5868,8850	RAB5A,KAT2B	0.50115
Pinto2014:0004 Pinto2014_DAPPLE	int976:chr2:170274818..170578931	chr2:169963618..170289122	4036	LRP2	0.50115
Pinto2014:0004 Pinto2014_DAPPLE	int528:chr2:230618034..230870007	chr2:230608552..230856725	9320	TRIP12	0.50115
Pinto2014:0004 Pinto2014_DAPPLE	int383:chr7:104524092..105087973	chr7:104584636..104774532	55904	KMT2E	0.50115
Pinto2014:0004 Pinto2014_DAPPLE	int537,int523:chr6:162933134..163273912	chr6:161748589..163218834	5071	PARK2	0.50115
Pinto2014:0004 Pinto2014_DAPPLE	int135,int45,int386:chr3:70900385..71194680	chr3:70983864..71703140	27086	FOXP1	0.50115
Pinto2014:0004 Pinto2014_DAPPLE	int640,int663:chr17:28733862..29738071	chr17:29227955..29346929	84282	RNF135	0.50115
Pinto2014:0004 Pinto2014_DAPPLE	int584,int866,int491:chr17:55547695..55777985	chr17:55263930..55777299	124540	MSI2	0.50115
Pinto2014:0004 Pinto2014_DAPPLE	int309,int456,int686:chr9:9209799..9440297	chr9:8294245..10682723	5789	PTPRD	0.50115
Pinto2014:0004 Pinto2014_DAPPLE	int518:chr14:79681303..79767060	chr14:78800073..80354633	9369	NRXN3	0.50115
Pinto2014:0004 Pinto2014_DAPPLE	int806:chr18:74030680..74061749	chr18:74049636..74277146	9658	ZNF516	0.50115
Pinto2014:0004 Pinto2014_DAPPLE	int695,int832:chr3:55062106..55097273	chr3:54086692..55128584	55799	CACNA2D3	0.50115
Pinto2014:0004 Pinto2014_DAPPLE	int54,int55:chr4:93452066..94157778	chr4:93155549..94771142	2895,474	GRID2,ATOH1	0.50115
Pinto2014:0004 Pinto2014_DAPPLE	int752:chr2:102860321..103080103	chr2:102857961..102988497	9173	IL1RL1	0.50115
Pinto2014:0004 Pinto2014_DAPPLE	int358:chr1:192991783..193429853	chr1:192958551..193080906	6738	TROVE2	0.50115
Pinto2014:0004 Pinto2014_DAPPLE	int803,int176:chr2:162193238..162878404	chr2:162202619..162301573	10716	TBR1	0.50115
Pinto2014:0004 Pinto2014_DAPPLE	int471:chr12:51983427..52209780	chr12:51915019..52226648	6334	SCN8A	0.50115
DeRubeis2014:0003 DeRubeis2014_SYNAPTIC	int563,int591:chr17:64251733..64534580	chr17:64228925..64826862	5578	PRKCA	0.558344
DeRubeis2014:0003 DeRubeis2014_SYNAPTIC	int210:chr6:16714217..16753147	chr6:16279342..16831721	6310	ATXN1	0.558344
DeRubeis2014:0003 DeRubeis2014_SYNAPTIC	int183:chr3:47588649..48326433	chr3:48194836..48286981	820	CAMP	0.558344
DeRubeis2014:0003 DeRubeis2014_SYNAPTIC	int150:chr13:111719291..111780597	chr13:111697623..111978081	8874	ARHGEF7	0.558344
DeRubeis2014:0003 DeRubeis2014_SYNAPTIC	int524,int169,int177,int40:chr17:72839130..73534485	chr17:73294156..73471790	2885	GRB2	0.558344
DeRubeis2014:0003 DeRubeis2014_SYNAPTIC	int537,int523:chr6:162933134..163273912	chr6:161748589..163218834	5071	PARK2	0.558344
DeRubeis2014:0003 DeRubeis2014_SYNAPTIC	int360:chr12:110060137..110740470	chr12:110347606..110504194	9815	GIT2	0.558344
DeRubeis2014:0003 DeRubeis2014_SYNAPTIC	int701:chr2:173620465..173716172	chr2:173530524..173937620	11069	RAPGEF4	0.558344
Pinto2014:0001 Pinto2014_ASD	int646:chr7:147754924..147812966	chr7:145743452..148138088	26047	CNTNAP2	0.588641
Pinto2014:0001 Pinto2014_ASD	int135,int45,int386:chr3:70900385..71194680	chr3:70983864..71703140	27086	FOXP1	0.588641
Pinto2014:0001 Pinto2014_ASD	int781:chr1:46615056..46892812	chr1:46634352..46755977	55624	POMGNT1	0.588641
Pinto2014:0001 Pinto2014_ASD	int123,int408,int72:chr16:2014130..2289455	chr16:2027989..2158713	7249	TSC2	0.588641
Pinto2014:0001 Pinto2014_ASD	int849:chr1:98297731..98562260	chr1:97523299..98456615	1806	DPYD	0.588641
Pinto2014:0001 Pinto2014_ASD	int471:chr12:51983427..52209780	chr12:51915019..52226648	6334	SCN8A	0.588641
Pinto2014:0001 Pinto2014_ASD	int675:chr5:125882825..125882825	chr5:125857532..126001082	501	ALDH7A1	0.588641
Pinto2014:0001 Pinto2014_ASD	int640,int663:chr17:28733862..29738071	chr17:29351944..29724695	4763	NF1	0.588641
Pinto2014:0001 Pinto2014_ASD	int640,int663:chr17:28733862..29738071	chr17:29227955..29346929	84282	RNF135	0.588641
Iossifov2014:0008 Iossifov2014_PSD	int192,int981:chr3:10281647..10510287	chr3:10322612..10617268	6396,491	SEC13,ATP2B2	0.640136
Iossifov2014:0008 Iossifov2014_PSD	int926:chr1:156647931..156655253	chr1:156519085..156649324	60484,63827	HAPLN2,BCAN	0.640136
Iossifov2014:0008 Iossifov2014_PSD	int995:chr6:149813940..150180259	chr6:150000830..150152557	5110	PCMT1	0.640136
Iossifov2014:0008 Iossifov2014_PSD	int974:chr8:41723550..41935324	chr8:41490743..41824280	286	ANK1	0.640136
Iossifov2014:0008 Iossifov2014_PSD	int834,int232:chr10:97050555..97725111	chr10:97051529..97391177	10580	SORBS1	0.640136
Iossifov2014:0008 Iossifov2014_PSD	int562:chr17:10035379..10035379	chr17:9793925..10171868	8522	GAS7	0.640136
Iossifov2014:0008 Iossifov2014_PSD	int520:chr1:116906839..116948712	chr1:116845794..116967396	476	ATP1A1	0.640136
Iossifov2014:0008 Iossifov2014_PSD	int611,int483:chr15:90580008..90756292	chr15:90607210..90715786	3418	IDH2	0.640136
Iossifov2014:0008 Iossifov2014_PSD	int803,int176:chr2:162193238..162878404	chr2:162094785..162288228	10213	PSMD14	0.640136
Iossifov2014:0008 Iossifov2014_PSD	int563,int591:chr17:64251733..64534580	chr17:64228925..64826862	5578	PRKCA	0.640136
Iossifov2014:0008 Iossifov2014_PSD	int900,int732:chr1:66983920..67221552	chr1:66929251..67236822	84251	SGIP1	0.640136
Iossifov2014:0008 Iossifov2014_PSD	int8,int750:chr11:132912844..132936734	chr11:132264874..133472403	4978	OPCML	0.640136
Iossifov2014:0008 Iossifov2014_PSD	int391:chr2:237021346..237136992	chr2:236332732..237060444	116987	AGAP1	0.640136
Iossifov2014:0008 Iossifov2014_PSD	int641:chr18:32622168..32926744	chr18:32003253..32743432	1837,10982	DTNA,MAPRE2	0.640136
Iossifov2014:0008 Iossifov2014_PSD	int200:chr19:11220410..11257018	chr19:11254942..11378243	25959	KANK2	0.640136
Iossifov2014:0008 Iossifov2014_PSD	int743:chr8:27475767..27564846	chr8:27434433..27542328	1191	CLU	0.640136
Iossifov2014:0008 Iossifov2014_PSD	int524,int169,int177,int40:chr17:72839130..73534485	chr17:73014954..73113074	10476	ATP5H	0.640136
Iossifov2014:0008 Iossifov2014_PSD	int637:chr11:2956783..3091788	chr11:2945659..3083607	4676	NAP1L4	0.640136
Iossifov2014:0008 Iossifov2014_PSD	int807,int254:chr3:50058610..50412945	chr3:50194119..50316786	2771	GNAI2	0.640136
Iossifov2014:0008 Iossifov2014_PSD	int487,int578:chr5:166984363..167900328	chr5:167843462..167966309	5917	RARS	0.640136
Iossifov2014:0008 Iossifov2014_PSD	int73:chr19:7636751..7731619	chr19:7529037..7646653	10908	PNPLA6	0.640136
Iossifov2014:0008 Iossifov2014_PSD	int985:chr1:240300129..240300129	chr1:240185184..240658489	56776	FMN2	0.640136
Iossifov2014:0008 Iossifov2014_PSD	int41:chr1:236899343..236938860	chr1:236779753..236947927	88	ACTN2	0.640136
Iossifov2014:0008 Iossifov2014_PSD	int646:chr7:147754924..147812966	chr7:145743452..148138088	26047	CNTNAP2	0.640136
Iossifov2014:0008 Iossifov2014_PSD	int807,int254:chr3:50058610..50412945	chr3:50380043..50611675	9254	CACNA2D2	0.640136
Iossifov2014:0008 Iossifov2014_PSD	int994:chr10:21406811..21458310	chr10:21048902..21533116	10529	NEBL	0.640136
Iossifov2014:0008 Iossifov2014_PSD	int143:chr15:52811815..52811815	chr15:52579479..52891247	4644	MYO5A	0.640136
Iossifov2014:0008 Iossifov2014_PSD	int406:chr3:121342819..121727963	chr3:121362045..121538614	2804	GOLGB1	0.640136
Iossifov2014:0008 Iossifov2014_PSD	int474:chr2:222225453..222272013	chr2:222262746..222508922	2043	EPHA4	0.640136
Iossifov2014:0008 Iossifov2014_PSD	int660:chr16:24099496..24106227	chr16:23777299..24251932	5579	PRKCB	0.640136
Iossifov2014:0008 Iossifov2014_PSD	int966,int414:chr2:206952515..207224602	chr2:206967802..207094243	4719	NDUFS1	0.640136
Iossifov2014:0008 Iossifov2014_PSD	int924:chr7:154554896..154565111	chr7:153514181..154706000	1804	DPP6	0.640136
Iossifov2014:0008 Iossifov2014_PSD	int399:chr8:19987914..19987914	chr8:19984703..20099207	526	ATP6V1B2	0.640136
Iossifov2014:0008 Iossifov2014_PSD	int753:chr8:38622060..38622060	chr8:38515703..38730546	6867	TACC1	0.640136
Iossifov2014:0008 Iossifov2014_PSD	int309,int456,int686:chr9:9209799..9440297	chr9:8294245..10682723	5789	PTPRD	0.640136
Iossifov2014:0008 Iossifov2014_PSD	int365:chr9:75798406..76200815	chr9:75696646..75805310	301	ANXA1	0.640136
Iossifov2014:0008 Iossifov2014_PSD	int179:chr9:114918772..115147463	chr9:115072188..115254685	84263	HSDL2	0.640136
Iossifov2014:0008 Iossifov2014_PSD	int341,int67,int535:chr10:61562977..61808880	chr10:61766055..62563284	288	ANK3	0.640136
Iossifov2014:0008 Iossifov2014_PSD	int676:chr11:35399975..35403124	chr11:35252751..35511610	6506	SLC1A2	0.640136
Iossifov2014:0008 Iossifov2014_PSD	int110,int650:chr1:43970956..44369444	chr1:43926546..44109343	5792	PTPRF	0.640136
Iossifov2014:0008 Iossifov2014_PSD	int51:chr1:77899667..78819970	chr1:78400635..78502995	11080	DNAJB4	0.640136
Iossifov2014:0008 Iossifov2014_PSD	int953:chr16:83692881..83756988	chr16:82590398..83850215	1012	CDH13	0.640136
Iossifov2014:0008 Iossifov2014_PSD	int279,int278:chr22:32977782..33041767	chr22:32888539..33524377	8224	SYN3	0.640136
Iossifov2014:0008 Iossifov2014_PSD	int883:chr1:161494127..161504858	chr1:161424329..161516687	3310	HSPA6	0.640136
Iossifov2014:0008 Iossifov2014_PSD	int299:chr13:98966784..99020971	chr13:98724815..99122027	10160	FARP1	0.640136
Iossifov2014:0008 Iossifov2014_PSD	int516:chr17:66547409..66560097	chr17:66339763..66567457	5573	PRKAR1A	0.640136
Iossifov2014:0008 Iossifov2014_PSD	int383:chr7:104524092..105087973	chr7:104736820..105099377	6733	SRPK2	0.640136
Iossifov2014:0008 Iossifov2014_PSD	int675:chr5:125882825..125882825	chr5:125857532..126001082	501	ALDH7A1	0.640136
Iossifov2014:0008 Iossifov2014_PSD	int118:chr4:160185669..160355746	chr4:160118997..160301301	9693	RAPGEF2	0.640136
Iossifov2014:0008 Iossifov2014_PSD	int206:chr12:53716133..53929672	chr12:53775885..53894946	5094	PCBP2	0.640136
Iossifov2014:0008 Iossifov2014_PSD	int150:chr13:111719291..111780597	chr13:111697623..111978081	8874	ARHGEF7	0.640136
Iossifov2014:0008 Iossifov2014_PSD	int871:chr19:47969394..48115083	chr19:47911278..48088515	6543,8775	SLC8A2,NAPA	0.640136
Iossifov2014:0008 Iossifov2014_PSD	int589:chr17:43507403..44672951	chr17:44598034..44854828	4905	NSF	0.640136
Iossifov2014:0008 Iossifov2014_PSD	int954:chr2:27281034..27934711	chr2:27370257..27486660	790	CAD	0.640136
Iossifov2014:0008 Iossifov2014_PSD	int545:chr10:91369885..91593216	chr10:91391346..91554700	9585	KIF20B	0.640136
Iossifov2014:0008 Iossifov2014_PSD	int394,int794,int346,int87,int639:chr18:9478794..9988562	chr18:9843954..9980018	9218	VAPA	0.640136
Iossifov2014:0008 Iossifov2014_PSD	int651:chr18:43617872..43716475	chr18:43644109..43754199	498	ATP5A1	0.640136
Iossifov2014:0008 Iossifov2014_PSD	int546:chr19:51134298..51152949	chr19:51145083..51290195	50944	SHANK1	0.640136
Iossifov2014:0008 Iossifov2014_PSD	int360:chr12:110060137..110740470	chr12:110649031..110808897	488	ATP2A2	0.640136
Iossifov2014:0008 Iossifov2014_PSD	int606:chr15:60608397..60670149	chr15:60619349..60760185	302	ANXA2	0.640136
Iossifov2014:0008 Iossifov2014_PSD	int447,int959:chr8:102749568..103193781	chr8:102678769..103207135	83988	NCALD	0.640136
Iossifov2014:0008 Iossifov2014_PSD	int97:chr2:118368816..118873792	chr2:118653053..118841739	54520	CCDC93	0.640136
Iossifov2014:0008 Iossifov2014_PSD	int434,int464:chr14:23020706..23082027	chr14:23013806..23128143	1603	DAD1	0.640136
Iossifov2014:0008 Iossifov2014_PSD	int777:chr3:184517015..184517041	chr3:184459930..184790402	23355	VPS8	0.640136
Iossifov2014:0008 Iossifov2014_PSD	int631,int222,int501:chr2:62905539..64334456	chr2:63998097..64138696	7360	UGP2	0.640136
Iossifov2014:0008 Iossifov2014_PSD	int265:chr5:130655526..131539255	chr5:131265666..131417761	23305	ACSL6	0.640136
Iossifov2014:0008 Iossifov2014_PSD	int518:chr14:79681303..79767060	chr14:78800073..80354633	9369	NRXN3	0.640136
Iossifov2014:0008 Iossifov2014_PSD	int268:chr7:77862252..77953248	chr7:77626373..79152890	9863	MAGI2	0.640136
Iossifov2014:0008 Iossifov2014_PSD	int106,int182,int348:chr10:103804114..104209407	chr10:104142373..104332512	5662,10121	PSD,ACTR1A	0.640136
Iossifov2014:0008 Iossifov2014_PSD	int946:chr11:9964346..10331664	chr11:9780213..10385754	81846	SBF2	0.640136
Iossifov2014:0008 Iossifov2014_PSD	int589:chr17:43507403..44672951	chr17:43901747..44125699	4137	MAPT	0.640136
Iossifov2014:0008 Iossifov2014_PSD	int916:chr17:42009211..42272586	chr17:41932726..42057079	4355	MPP2	0.640136
Iossifov2014:0008 Iossifov2014_PSD	int47:chr15:90890799..91083353	chr15:90861472..91065475	8826	IQGAP1	0.640136
Iossifov2014:0008 Iossifov2014_PSD	int183:chr3:47588649..48326433	chr3:47774398..48200769	22907,4134	DHX30,MAP4	0.640136
Iossifov2014:0008 Iossifov2014_PSD	int343:chr1:231334780..231346779	chr1:231306918..231433719	8443	GNPAT	0.640136
Iossifov2014:0008 Iossifov2014_PSD	int640,int663:chr17:28733862..29738071	chr17:29601667..29694380	4974	OMG	0.640136
Iossifov2014:0008 Iossifov2014_PSD	int810:chr3:13156835..13205932	chr3:12918541..13184617	9922	IQSEC1	0.640136
Iossifov2014:0008 Iossifov2014_PSD	int575:chr11:68588176..68796746	chr11:68502087..68679399	1374	CPT1A	0.640136
Iossifov2014:0008 Iossifov2014_PSD	int796:chr3:28277894..28644307	chr3:28213123..28381263	152100	CMC1	0.640136
Iossifov2014:0008 Iossifov2014_PSD	int942:chr1:47687084..47997658	chr1:47729468..47864511	51727	CMPK1	0.640136
Iossifov2014:0008 Iossifov2014_PSD	int740,int957:chr12:130869054..130906479	chr12:130860680..131072410	23504	RIMBP2	0.640136
Iossifov2014:0008 Iossifov2014_PSD	int847,int470:chr4:186491772..186859331	chr4:186486597..186947870	8470	SORBS2	0.640136
Iossifov2014:0008 Iossifov2014_PSD	int123,int408,int72:chr16:2014130..2289455	chr16:2207183..2316465	57524	CASKIN1	0.640136
Iossifov2014:0008 Iossifov2014_PSD	int701:chr2:173620465..173716172	chr2:173530524..173937620	11069	RAPGEF4	0.640136
Iossifov2014:0008 Iossifov2014_PSD	int123,int408,int72:chr16:2014130..2289455	chr16:1939516..2158713	4716,9143,9351,7249	NDUFB10,SYNGR3,SLC9A3R2,TSC2	0.640136
Iossifov2014:0008 Iossifov2014_PSD	int38:chr10:35878148..35909646	chr10:35465908..35881598	219771	CCNY	0.640136
Iossifov2014:0008 Iossifov2014_PSD	int108,int353:chr19:49451217..49659014	chr19:49547617..49674287	64130,8541	LIN7B,PPFIA3	0.640136
Iossifov2014:0008 Iossifov2014_PSD	int185,int420:chr1:29186719..29593410	chr1:29143602..29466558	2035	EPB41	0.640136
Iossifov2014:0008 Iossifov2014_PSD	int524,int169,int177,int40:chr17:72839130..73534485	chr17:73212686..73328474	23163	GGA3	0.640136
Iossifov2014:0008 Iossifov2014_PSD	int781:chr1:46615056..46892812	chr1:46789938..46899520	2166	FAAH	0.640136
Iossifov2014:0008 Iossifov2014_PSD	int16,int7,int220:chr7:132938039..133542099	chr7:132867822..133770513	60412	EXOC4	0.640136
Iossifov2014:0008 Iossifov2014_PSD	int802:chr12:4734085..4734085	chr12:4688263..4816720	4704	NDUFA9	0.640136
Iossifov2014:0008 Iossifov2014_PSD	int822:chr2:72395464..73084166	chr2:72386443..73123177	23233	EXOC6B	0.640136
Iossifov2014:0008 Iossifov2014_PSD	int51:chr1:77899667..78819970	chr1:77677661..78045654	26289	AK5	0.640136
Iossifov2014:0008 Iossifov2014_PSD	int66:chr5:133294384..133416974	chr5:133287565..133410824	7416	VDAC1	0.640136
Iossifov2014:0008 Iossifov2014_PSD	int631,int222,int501:chr2:62905539..64334456	chr2:63745742..63854330	4190	MDH1	0.640136
Iossifov2014:0008 Iossifov2014_PSD	int148:chr2:84726156..84894838	chr2:84630646..84756586	8802	SUCLG1	0.640136
Iossifov2014:0008 Iossifov2014_PSD	int652,int424,int424,int85,int458:chr17:48396110..48647011	chr17:48438593..48544914	55379	LRRC59	0.640136
Iossifov2014:0008 Iossifov2014_PSD	int782:chr7:24509698..24611183	chr7:24542964..24753322	51678	MPP6	0.640136
Iossifov2014:0008 Iossifov2014_PSD	int155:chr7:127263886..127788296	chr7:127158405..127752659	381,27044	ARF5,SND1	0.640136
Iossifov2014:0008 Iossifov2014_PSD	int898:chr15:62874445..62911117	chr15:62869509..63156829	83660	TLN2	0.640136
Sanders2015:0001 Sanders2015_CNV_REGION	int90:chr7:73877809..73987405	chr7:73372118..74195022	2006,3984,7458,7462,5982,7461,9569,2969	ELN,LIMK1,EIF4H,LAT2,RFC2,CLIP2,GTF2IRD1,GTF2I	0.672033
Sanders2015:0001 Sanders2015_CNV_REGION	int297:chr15:23931507..23949863	chr15:23868695..24002450	54551,4692	MAGEL2,NDN	0.672033
Sanders2015:0001 Sanders2015_CNV_REGION	int436:chr22:20031102..20162758	chr22:19631986..20207431	5413,2812,6899,54584,79680,10587,1312,128989,421,54487,5902,29801,27037,388849	SEPT5,GP1BB,TBX1,GNB1L,C22ORF29,TXNRD2,COMT,TANGO2,ARVCF,DGCR8,RANBP1,ZDHHC8,TRMT2A,CCDC188	0.672033
Sugathan2014:0005 Sugathan2014_M4	int939:chr6:109279211..109468770	chr6:109287639..109485708	27244	SESN1	0.676632
Sugathan2014:0005 Sugathan2014_M4	int615:chr7:63757160..64210052	chr7:63704250..63837012	728927	ZNF736	0.676632
Sugathan2014:0005 Sugathan2014_M4	int261:chr11:57989089..58437328	chr11:58274343..58415712	9404	LPXN	0.676632
Sugathan2014:0005 Sugathan2014_M4	int8,int750:chr11:132912844..132936734	chr11:132264874..133472403	4978	OPCML	0.676632
Sugathan2014:0005 Sugathan2014_M4	int265:chr5:130655526..131539255	chr5:131508303..131633556	8974	P4HA2	0.676632
Sugathan2014:0005 Sugathan2014_M4	int275,int488,int178,int78,int259,int715,int886,int432,int23,int598,int745,int325,int196:chr8:8088877..11886722	chr8:9343444..9659856	8658	TNKS	0.676632
Sugathan2014:0005 Sugathan2014_M4	int16,int7,int220:chr7:132938039..133542099	chr7:132867822..133770513	60412	EXOC4	0.676632
Sugathan2014:0005 Sugathan2014_M4	int192,int981:chr3:10281647..10510287	chr3:10307433..10404631	51738	GHRL	0.676632
Sugathan2014:0005 Sugathan2014_M4	int406:chr3:121342819..121727963	chr3:121543170..121683034	6565	SLC15A2	0.676632
Sugathan2014:0005 Sugathan2014_M4	int777:chr3:184517015..184517041	chr3:184459930..184790402	23355	VPS8	0.676632
Sugathan2014:0005 Sugathan2014_M4	int618,int77:chr2:98998983..100146146	chr2:99593723..99841187	80705	TSGA10	0.676632
Sugathan2014:0005 Sugathan2014_M4	int802:chr12:4734085..4734085	chr12:4629237..4828213	8798,10566	DYRK4,AKAP3	0.676632
Sugathan2014:0005 Sugathan2014_M4	int876:chr12:31915159..32023666	chr12:31804070..31952108	196394	AMN1	0.676632
Sugathan2014:0005 Sugathan2014_M4	int807,int254:chr3:50058610..50412945	chr3:50317319..50419812	3373	HYAL1	0.676632
Sugathan2014:0005 Sugathan2014_M4	int294:chr21:38458048..38598090	chr21:38375570..38595408	7267	TTC3	0.676632
Sugathan2014:0005 Sugathan2014_M4	int97:chr2:118368816..118873792	chr2:118776049..118887597	51141	INSIG2	0.676632
Sugathan2014:0005 Sugathan2014_M4	int537,int523:chr6:162933134..163273912	chr6:163078163..163756524	135138	PACRG	0.676632
Sugathan2014:0005 Sugathan2014_M4	int383:chr7:104524092..105087973	chr7:104736820..105099377	6733	SRPK2	0.676632
Sugathan2014:0005 Sugathan2014_M4	int631,int222,int501:chr2:62905539..64334456	chr2:64099666..64316214	51542	VPS54	0.676632
Sugathan2014:0005 Sugathan2014_M4	int504:chr19:20864227..20893225	chr19:20782744..20914402	199777	ZNF626	0.676632
Sugathan2014:0005 Sugathan2014_M4	int652,int424,int424,int85,int458:chr17:48396110..48647011	chr17:48433518..48572206	80221	ACSF2	0.676632
Sugathan2014:0005 Sugathan2014_M4	int543:chr15:72097992..73161393	chr15:72696666..72898896	25820	ARIH1	0.676632
Sugathan2014:0005 Sugathan2014_M4	int143:chr15:52811815..52811815	chr15:52579479..52891247	4644	MYO5A	0.676632
Sugathan2014:0005 Sugathan2014_M4	int641:chr18:32622168..32926744	chr18:32811021..32940209	100101467	ZSCAN30	0.676632
Sugathan2014:0005 Sugathan2014_M4	int615:chr7:63757160..64210052	chr7:63960254..64093505	340252	ZNF680	0.676632
Sugathan2014:0005 Sugathan2014_M4	int896:chr4:140664444..140676533	chr4:140617545..141145233	55534	MAML3	0.676632
Sugathan2014:0005 Sugathan2014_M4	int213:chr5:171260919..171274885	chr5:171268555..171503877	23291	FBXW11	0.676632
Sugathan2014:0005 Sugathan2014_M4	int256:chr14:31347709..31353247	chr14:31343004..31565607	29966	STRN3	0.676632
Sugathan2014:0005 Sugathan2014_M4	int406:chr3:121342819..121727963	chr3:121362045..121538614	2804	GOLGB1	0.676632
Sugathan2014:0005 Sugathan2014_M4	int114:chr14:92544769..92639767	chr14:92504895..92642965	4287	ATXN3	0.676632
Sugathan2014:0005 Sugathan2014_M4	int618,int77:chr2:98998983..100146146	chr2:99880700..99987639	129530	LYG1	0.676632
Pinto2014:0002 Pinto2014_ASD_HIGHCONF	int258:chr13:24482512..24494811	chr13:24483764..24901212	221178	SPATA13	0.69683
Pinto2014:0002 Pinto2014_ASD_HIGHCONF	int803,int176:chr2:162193238..162878404	chr2:162202619..162301573	10716	TBR1	0.69683
Pinto2014:0002 Pinto2014_ASD_HIGHCONF	int756:chr3:20191506..20373412	chr3:19918571..20215896	5868,8850	RAB5A,KAT2B	0.69683
Pinto2014:0002 Pinto2014_ASD_HIGHCONF	int917:chr21:40505513..40839630	chr21:40537403..40755712	54014	BRWD1	0.69683
Pinto2014:0002 Pinto2014_ASD_HIGHCONF	int309,int456,int686:chr9:9209799..9440297	chr9:8294245..10682723	5789	PTPRD	0.69683
Pinto2014:0002 Pinto2014_ASD_HIGHCONF	int976:chr2:170274818..170578931	chr2:169963618..170289122	4036	LRP2	0.69683
Pinto2014:0002 Pinto2014_ASD_HIGHCONF	int518:chr14:79681303..79767060	chr14:78800073..80354633	9369	NRXN3	0.69683
Pinto2014:0002 Pinto2014_ASD_HIGHCONF	int609:chr5:75691606..75743907	chr5:75629079..76023957	10788	IQGAP2	0.69683
Pinto2014:0002 Pinto2014_ASD_HIGHCONF	int537,int523:chr6:162933134..163273912	chr6:161748589..163218834	5071	PARK2	0.69683
Pinto2014:0007 Pinto2014_MAPK	int123,int408,int72:chr16:2014130..2289455	chr16:2027989..2158713	7249	TSC2	0.736326
Pinto2014:0007 Pinto2014_MAPK	int609:chr5:75691606..75743907	chr5:75629079..76023957	10788	IQGAP2	0.736326
Pinto2014:0007 Pinto2014_MAPK	int640,int663:chr17:28733862..29738071	chr17:29351944..29724695	4763	NF1	0.736326
Pinto2014:0008 Pinto2014_NEURONAL	int803,int176:chr2:162193238..162878404	chr2:162202619..162301573	10716	TBR1	0.772723
Pinto2014:0008 Pinto2014_NEURONAL	int537,int523:chr6:162933134..163273912	chr6:161748589..163218834	5071	PARK2	0.772723
Pinto2014:0008 Pinto2014_NEURONAL	int518:chr14:79681303..79767060	chr14:78800073..80354633	9369	NRXN3	0.772723
Pinto2014:0003 Pinto2014_CHROMATIN	int756:chr3:20191506..20373412	chr3:20011523..20215896	8850	KAT2B	1
DeRubeis2014:0001 DeRubeis2014_ASD_RISK	int803,int176:chr2:162193238..162878404	chr2:162202619..162301573	10716	TBR1	1
DeRubeis2014:0004 DeRubeis2014_TGFB	int657:chr6:44852734..45396544	chr6:45226053..45538819	860	RUNX2	1
DeRubeis2014:0001 DeRubeis2014_ASD_RISK	int695,int832:chr3:55062106..55097273	chr3:54086692..55128584	55799	CACNA2D3	1
Pinto2014:0003 Pinto2014_CHROMATIN	int917:chr21:40505513..40839630	chr21:40537403..40755712	54014	BRWD1	1
DeRubeis2014:0004 DeRubeis2014_TGFB	int785:chr8:38014429..38316849	chr8:37893010..38017598	9070	ASH2L	1

## Sheet: Interval Summary
INTERVAL	N_SNP	N_ALTLOC	GENE_ID	GENE_DESC
int10,int115:chr9:124971170..124982500	22	427289	153090,158135,254956,4702,26468,92399,92400,5742	DAB2IP,TTLL11,MORN5,NDUFA8,LHX6,MRRF,RBM18,PTGS1
int105:chr16:51163406..51211595	65	215169	6299	SALL1
int106,int182,int348:chr10:103804114..104209407	465	76667	10660,8945,25911,27343,6468,2253,10360,10724,30819,79591,79803,23082,9221,8861,83401,8729,5309,4791,79176,5662,79004,79946,51684,10121,81603,118980,403,54838,119032,57412,1586,54805,22978,729020,9118,84108,6877,22984,84833,9148,51063,255022,119395,9644,79991,9748,1308,119392,80217,9446,119391,159686,85450	LBX1,BTRC,DPCD,POLL,FBXW4,FGF8,NPM3,MGEA5,KCNIP2,C10ORF76,HPS6,PPRC1,NOLC1,LDB1,ELOVL3,GBF1,PITX3,NFKB2,FBXL15,PSD,CUEDC2,C10ORF95,SUFU,ACTR1A,TRIM8,SFXN2,ARL3,WBP1L,BORCS7,AS3MT,CYP17A1,CNNM2,NT5C2,RPEL1,INA,PCGF6,TAF5,PDCD11,USMG5,NEURL1,CALHM2,CALHM1,CALHM3,SH3PXD2A,OBFC1,SLK,COL17A1,SFR1,CFAP43,GSTO1,GSTO2,CFAP58,ITPRIP
int107,int35:chr15:47716150..48050095	716	775108	80031	SEMA6D
int108,int353:chr19:49451217..49659014	577	421596	27076,653583,284346,23474,390940,7515,79177,100170229,126298,126299,199731,5329,56269,56006,3783,284349,284348,342908,7638,7596,7711,7773,7673,7766,342909,7767,7768,10780,7769,7770,353355,9310,7771,26974,7772,7733,125931,147710,5817,56971,388551,602,23624,4059,5819,10452,348,341,346,344,1209,5971,11129,79760,284352,162979,388552,284353,79090,57787,90332,147700,1158,2068,10849,10848,2067,2354,1476…	LYPD3,PHLDB3,ZNF575,ETHE1,PINLYP,XRCC1,ZNF576,SRRM5,IRGQ,ZNF428,CADM4,PLAUR,IRGC,SMG9,KCNN4,ZNF283,LYPD5,ZNF404,ZNF221,ZNF45,ZNF155,ZNF230,ZNF222,ZNF223,ZNF284,ZNF224,ZNF225,ZNF234,ZNF226,ZNF227,ZNF233,ZNF235,ZNF112,ZNF285,ZNF229,ZNF180,CEACAM20,IGSF23,PVR,CEACAM19,CEACAM16,BCL3,CBLC,BCAM,PVRL2,TOMM40,APOE,APOC1,APOC4,APOC2,CLPTM1,RELB,CLASRP,GEMIN7,PPP1R37,ZNF296,BLOC1S3,NKPD1,TRAPPC6A,MARK4,EXO…
int11,int649:chr6:11712240..11774626	211	656419	84830	ADTRP
int110,int650:chr1:43970956..44369444	801	659836	440585,149465,10969,128218,7075,149466,4352,991,23334,64834,112950,81888,5792,9682,6487,9048,9670,1802,533,8704,149473,6536,128209,55929,79033,55182,339541,79639,11004,6202,1263,149478,266675,343521,8643,8891,7389,79654,57643,84842,114034,4595,10420,25974,10327,5052,4678,149483,60313,51249,3652,23139,8503,10103,541468,55624,8438,7388,10489,387338,2166	FAM183A,CFAP57,EBNA1BP2,TMEM125,TIE1,C1ORF210,MPL,CDC20,SZT2,ELOVL1,MED8,HYI,PTPRF,KDM4A,ST3GAL3,ARTN,IPO13,DPH2,ATP6V0B,B4GALT2,CCDC24,SLC6A9,KLF17,DMAP1,ERI3,RNF220,C1ORF228,TMEM53,KIF2C,RPS8,PLK3,BTBD19,BEST4,TCTEX1D4,PTCH2,EIF2B3,UROD,HECTD3,ZSWIM5,HPDL,TOE1,MUTYH,TESK2,MMACHC,AKR1A1,PRDX1,NASP,CCDC17,GPBP1L1,TMEM69,IPP,MAST2,PIK3R3,TSPAN1,LURAP1,POMGNT1,RAD54L,UQCRH,LRRC41,NSUN4,FAAH
int112:chr1:198543996..198593807	83	382204	127124,5788	ATP6V1G3,PTPRC
int113,int998:chr4:72510..498459	829	23055	170960,54872,5158,4636,10336,521,84179,10815,2580,84286,3425,1609,53834,10861,285498,10417,1487,10296,57654,285464,54729	ZNF721,PIGG,PDE6B,MYL5,PCGF3,ATP5I,MFSD7,CPLX1,GAK,TMEM175,IDUA,DGKQ,FGFRL1,SLC26A1,RNF212,SPON2,CTBP1,MAEA,UVSSA,CRIPAK,NKX1-1
int113,int998:chr4:72510..498459	829	23055	152687,255403	ZNF595,ZNF718
int113,int998:chr4:72510..498459	829	23055	654254,7700	ZNF732,ZNF141
int114:chr14:92544769..92639767	398	344656	145567,9252,80017,8111,440193,55671,79820,123036,10516,9321,4287,53981,4707	TTC7B,RPS6KA5,C14ORF159,GPR68,CCDC88C,PPP4R3A,CATSPERB,TC2N,FBLN5,TRIP11,ATXN3,CPSF2,NDUFB1
int117:chr6:85211666..85516100	786	974664	9096	TBX18
int118:chr4:160185669..160355746	279	384837	9693	RAPGEF2
int119:chr7:95080493..95161660	178	706902	55607,5444,5446,5445,51666	PPP1R9A,PON1,PON3,PON2,ASB4
int122,int331:chr1:184737999..184945900	382	542185	80267,116496,6045,54823,81627,10625	EDEM3,FAM129A,RNF2,SWT1,TRMT1L,IVNS1ABP
int123,int408,int72:chr16:2014130..2289455	566	721703	79622,4350,51728,64285,8131,3050,3042,3040,3039,3049,83986,55692,398,64714,8786,8312,4833,26063,10573,58986,9727,6650,146325,283948,9091,57799,117166,84331,197335,89941,9028,10273,84326,79006,65990,84264,339123,84219,146330,10232,124093,64428,63922,388199,113000,51764,64788,30812,6755,390664,8912,7177,23430,25823,64499,7329,8938,84572,115939,64718,283951,645811,9894,1186,79652,390667,9742,57585,9…	SNRNP25,MPG,POLR3K,RHBDF1,NPRL3,HBZ,HBM,HBA2,HBA1,HBQ1,FAM234A,LUC7L,ARHGDIG,PDIA2,RGS11,AXIN1,NME4,DECR2,MRPL28,TMEM8A,RAB11FIP3,CAPN15,PRR35,NHLRC4,PIGQ,RAB40C,WFIKKN1,FAM195A,WDR90,RHOT2,RHBDL1,STUB1,C16ORF13,METRN,FAM173A,HAGHL,JMJD8,WDR24,FBXL16,MSLN,CCDC78,NARFL,CHTF18,PRR25,RPUSD1,GNG13,LMF1,SOX8,SSTR5,C1QTNF8,CACNA1H,TPSAB1,TPSD1,TPSG1,TPSB2,UBE2I,BAIAP3,GNPTG,TSR3,UNKL,C16ORF91,CCDC154,T…
int124:chr3:118610653..118892550	670	925598	152404,152405,7348,8702,57514,56983,55254,51300,941,141,51365,64091,89876,10063,8856,2932,165829,116064,11167	IGSF11,C3ORF30,UPK1B,B4GALT4,ARHGAP31,POGLUT1,TMEM39A,TIMMDC1,CD80,ADPRH,PLA1A,POPDC2,MAATS1,COX17,NR1I2,GSK3B,GPR156,LRRC58,FSTL1
int125:chr13:53625781..54040483	845	673314	10562	OLFM4
int126:chr1:42274619..42350417	161	663629	1907,59269	EDN2,HIVEP3
int128,int398,int525,int610:chr7:148305430..148645341	626	528336	202865,8454,2146	C7ORF33,CUL1,EZH2
int129:chr2:77119035..77358977	896	439693	80059	LRRTM4
int131:chr5:96218598..96316470	276	853641	831,51752,64167,4012	CAST,ERAP1,ERAP2,LNPEP
int134:chr12:70913328..70944714	84	691097	5787,5801	PTPRB,PTPRR
int135,int45,int386:chr3:70900385..71194680	287	49230	27086	FOXP1
int136:chr14:64229305..64474121	641	973739	57381,122876,5529,112840,81537,23224,2100,4522,9495,7597,22890,3306,145376	RHOJ,GPHB5,PPP2R5E,WDR89,SGPP1,SYNE2,ESR2,MTHFD1,AKAP5,ZBTB25,ZBTB1,HSPA2,PPP1R36
int137:chr7:72022225..72417063	560	186499	441250,9883	TYW1B,POM121
int143:chr15:52811815..52811815	1	3780332	10017,10681,55930,4644,10776,56204,3175	BCL2L10,GNB5,MYO5C,MYO5A,ARPP19,FAM214A,ONECUT1
int145:chr5:126546576..126631791	142	393905	84466,133619	MEGF10,PRRC1
int146:chr10:127827758..127851175	171	53359	387718,26098,118856,56647,7390,55760,92565,8038,118611	TEX36,EDRF1,MMP21,BCCIP,UROS,DHX32,FANK1,ADAM12,C10ORF90
int147:chr15:85173872..85452820	651	909660	54993,84942,4828,23478,9640,57538,9154,5151	ZSCAN2,WDR73,NMB,SEC11A,ZNF592,ALPK3,SLC28A1,PDE8A
int148:chr2:84726156..84894838	233	216233	8802,1768,129293,9168,56888,83439,84173,10618,54884,284948,822,4144,8673,10791,2677,51255,10713,129303,388969,10578,6439,84913	SUCLG1,DNAH6,TRABD2A,TMSB10,KCMF1,TCF7L1,ELMOD3,TGOLN2,RETSAT,SH2D6,CAPG,MAT2A,VAMP8,VAMP5,GGCX,RNF181,USP39,TMEM150A,C2ORF68,GNLY,SFTPB,ATOH8
int15,int62,int95,int225:chr9:119138164..119529014	1063	949431	5069,23245,22954	PAPPA,ASTN2,TRIM32
int150:chr13:111719291..111780597	199	697729	8874,121793	ARHGEF7,TEX29
int152:chr9:72470461..72475010	13	494788	8395,116224,2395,5568,9414,9413,320,375743,138255	PIP5K1B,FAM122A,FXN,PRKACG,TJP2,FAM189A2,APBA1,PTAR1,C9ORF135
int153:chr8:39505191..39612977	199	520637	8749,2515,3620,169355	ADAM18,ADAM2,IDO1,IDO2
int154:chr16:20726949..20726949	1	3780332	348158,116285,6296,55623,81691,112479,57149,123879,55567,57146,257629,7783,1428	ACSM2B,ACSM1,ACSM3,THUMPD1,LOC81691,ERI2,LYRM1,DCUN1D3,DNAH3,TMEM159,ANKS4B,ZP2,CRYM
int155:chr7:127263886..127788296	714	133313	381,29999,79571,27044,5078,64101	ARF5,FSCN3,GCC1,SND1,PAX4,LRRC4
int159:chr6:116315485..116422847	167	325575	2444,221294,1300,29940,23270,7259,441168,254228,221301,100128327,51389,345895,3841,221302,221303,222545,222546	FRK,NT5DC1,COL10A1,DSE,TSPYL4,TSPYL1,FAM26F,FAM26E,FAM26D,TRAPPC3L,RWDD1,RSPH4A,KPNA5,ZUFSP,FAM162B,GPRC6A,RFX6
int16,int7,int220:chr7:132938039..133542099	792	104253	60412,136332,84912	EXOC4,LRGUK,SLC35B4
int161:chr8:97529682..97543956	65	323895	6383,10404	SDC2,CPQ
int163:chr8:66607219..66755163	298	664861	9650,55156,5150	MTFR1,ARMC1,PDE7A
int164:chr1:82220276..82539588	818	972879	23266	ADGRL2
int165:chr6:53590928..53829104	643	194040	401265,55227	KLHL31,LRRC1
int165:chr6:53590928..53829104	643	194040	90523,27283	MLIP,TINAG
int167,int677:chr6:83911265..84176272	493	557926	90025,23033,112611,5238,4199,167681,9892	UBE3D,DOPEY1,RWDD2A,PGM3,ME1,PRSS35,SNAP91
int170:chr14:73343471..73717433	951	955875	8110,26094,53349,58517,5663,89932,8650,79697,399671,641371,10965,122970,641372,83544,9240,91748,145482,57862,51004,145483,957,80127,91750,4329,338917,5826,55237	DPF3,DCAF4,ZFYVE1,RBM25,PSEN1,PAPLN,NUMB,C14ORF169,HEATR4,ACOT1,ACOT2,ACOT4,ACOT6,DNAL1,PNMA1,ELMSAN1,PTGR2,ZNF410,COQ6,FAM161B,ENTPD5,BBOF1,LIN52,ALDH6A1,VSX2,ABCD4,VRTN
int172,int492:chr14:24662857..24721665	90	307841	10901,317749,728635,90668,9362,5106,80344,4901,161247,5720,55072,10379,9985,51016,5721,283629,79711,51292,10548,29082,145553,100528064,4738,26277,7051,161424,56413,1241,5875,115817,27141,4776,196883,11035,57523,23351,643866,56948,1215,1511,2999,3002	DHRS4,DHRS4L2,DHRS4L1,LRRC16B,CPNE6,PCK2,DCAF11,NRL,FITM1,PSME1,RNF31,IRF9,REC8,EMC9,PSME2,TSSK4,IPO4,GMPR2,TM9SF1,CHMP4A,MDP1,NEDD8-MDP1,NEDD8,TINF2,TGM1,NOP9,LTB4R2,LTB4R,RABGGTA,DHRS1,CIDEB,NFATC4,ADCY4,RIPK3,NYNRIN,KHNYN,CBLN3,SDR39U1,CMA1,CTSG,GZMH,GZMB
int179:chr9:114918772..115147463	642	941277	64420,9991,84263,158405,58493,401548,57864	SUSD1,PTBP3,HSDL2,KIAA1958,INIP,SNX30,SLC46A2
int17:chr20:5029207..5042089	51	440608	9770,9962,8760,29058,5111	RASSF2,SLC23A2,CDS2,TMEM230,PCNA
int180:chr5:32461803..32493382	124	455263	23037,64083,54545,51663	PDZD2,GOLPH3,MTMR12,ZFR
int183:chr3:47588649..48326433	641	16332	1232,1230,729230,1234,9034,4057,83597,79442,6997,259236,259173,29122,100287362,377047,5745,339906,4634,151903,23218,29072,64147,23276,25930,22937,54859,10675,6599,22907,4134,993,820,51385,10201,646424,285231,51372,84126,5364,11277,79714,51246,5210,90226,1294,7384,440955,65010,1951,51517,51447,5576,788,10425,646450,54681,11180,25915,55152,3615,54870,5859,10869,3913,200942,339834,64925,646498,37534…	CCR3,CCR1,CCR2,CCR5,CCRL2,LTF,RTP3,LRRC2,TDGF1,TMIE,ALS2CL,PRSS50,PRSS46,PRSS45,PTH1R,PRSS42,MYL3,CCDC12,NBEAL2,SETD2,KIF9,KLHL18,PTPN23,SCAP,ELP6,CSPG5,SMARCC1,DHX30,MAP4,CDC25A,CAMP,ZNF589,NME6,SPINK8,FBXW12,TMA7,ATRIP,PLXNB1,TREX1,CCDC51,SHISA5,PFKFB4,UCN2,COL7A1,UQCRC1,TMEM89,SLC26A6,CELSR3,NCKIPSD,IP6K2,PRKAR2A,SLC25A20,ARIH2,ARIH2OS,P4HTM,WDR6,NDUFAF3,DALRD3,IMPDH2,QRICH1,QARS,USP19,LAMB2,K…
int184:chr2:228091192..228114954	174	51937	3667,84236,1286,1285,56947,79853,3267	IRS1,RHBDD1,COL4A4,COL4A3,MFF,TM4SF20,AGFG1
int185,int420:chr1:29186719..29593410	752	518948	8289,55650,84243,2810,10726,54707,63906,8431,388610,126695,115572,6548,23038,84065,84958,2827,9064,8547,388611,10163,27245,2268,2537,199870,23673,5511,9473,27293,6118,55113,2140,5724,93974,22826,83667,54797,65979,1104,54952,115273,6883,10691,51441,4985,2035,399474,6429,10076,51102	ARID1A,PIGV,ZDHHC18,SFN,NUDC,GPN2,GPATCH3,NR0B2,TRNP1,KDF1,FAM46B,SLC9A1,WDTC1,TMEM222,SYTL1,GPR3,MAP3K6,FCN3,CD164L2,WASF2,AHDC1,FGR,IFI6,FAM76A,STX12,PPP1R8,THEMIS2,SMPDL3B,RPA2,XKR8,EYA3,PTAFR,ATPIF1,DNAJC8,SESN2,MED18,PHACTR4,RCC1,TRNAU1AP,RAB42,TAF12,GMEB1,YTHDF2,OPRD1,EPB41,TMEM200B,SRSF4,PTPRU,MECR
int186,int306,int339,int46,int580:chr12:96089725..96302462	740	605845	59277,6636,120935,144193,3034,4048	NTN4,SNRPF,CCDC38,AMDHD1,HAL,LTA4H
int187:chr11:124406100..124446589	149	534181	283159,283160,26595,390271,283162,26493,390275,219858,116337,84897,53340,54414,4900,23584,90952,79684,64221,641654,54538,80071,220296,219855,219854,63876,403312,9638,9538,3703,1111,56,160065,100169851,399967,399968,219844,29118,83480,50937	OR8D1,OR8D2,OR8B2,OR8B3,OR8B4,OR8B8,OR8A1,OR8B12,PANX3,TBRG1,SPA17,SIAE,NRGN,VSIG2,ESAM,MSANTD2,ROBO3,HEPN1,ROBO4,CCDC15,HEPACAM,SLC37A2,TMEM218,PKNOX2,LOC403312,FEZ1,EI24,STT3A,CHEK1,ACRV1,PATE1,PATE3,PATE2,PATE4,HYLS1,DDX25,PUS3,CDON
int188,int50:chr19:30237263..30328851	216	794357	342865,10775,79156,83636,898	VSTM2B,POP4,PLEKHF1,C19ORF12,CCNE1
int189:chr9:114832028..114888773	147	774618	64420,9991,84263,158405,58493,401548,57864	SUSD1,PTBP3,HSDL2,KIAA1958,INIP,SNX30,SLC46A2
int192,int981:chr3:10281647..10510287	574	953970	56852,9901,25917,55209,375323,64419,151835,7862,4968,10093,100526693,8536,26140,10474,285367,84522,132014,63924,84818,78987,285368,55831,2177,401052,55845,115795,7428,3656,9797,51738,6396,491	RAD18,SRGAP3,THUMPD3,SETD5,LHFPL4,MTMR14,CPNE9,BRPF1,OGG1,ARPC4,ARPC4-TTLL3,CAMK1,TTLL3,TADA3,RPUSD3,JAGN1,IL17RE,CIDEC,IL17RC,CRELD1,PRRT3,EMC3,FANCD2,LOC401052,BRK1,FANCD2OS,VHL,IRAK2,TATDN2,GHRL,SEC13,ATP2B2
int193:chr2:61036023..61062412	49	452310	64895,5966,150962,5194,84542,339804,130872,9736,7514	PAPOLG,REL,PUS10,PEX13,KIAA1841,C2ORF74,AHSA2,USP34,XPO1
int194:chr14:68970211..69010925	105	719514	10243,161142,64398,1965,51382,26499,161145,57475,384,5283,10490,145226,51109,23503,5890	GPHN,FAM71D,MPP5,EIF2S1,ATP6V1D,PLEK2,TMEM229B,PLEKHH1,ARG2,PIGH,VTI1B,RDH12,RDH11,ZFYVE26,RAD51B
int197:chr7:133787989..133787989	1	3780332	60412,136332,84912	EXOC4,LRGUK,SLC35B4
int198,int315,int22:chr20:14696013..14913496	549	952879	55617,51575,79133,80343,140733,23767	TASP1,ESF1,NDUFAF5,SEL1L2,MACROD2,FLRT3
int199:chr12:108034827..108139363	269	867467	121551,11137,121549,11108	BTBD11,PWP1,ASCL4,PRDM4
int19:chr9:23735995..23849297	209	522678	1993	ELAVL2
int1:chr8:119093994..119128220	73	590727	2131,401474	EXT1,SAMD12
int2,int666:chr6:46044196..46150542	301	862197	53405,22875,59084,10231,51302,9481,221400,100287718,7941,4224,221395,266977	CLIC5,ENPP4,ENPP5,RCAN2,CYP39A1,SLC25A27,TDRD6,ANKRD66,PLA2G7,MEP1A,ADGRF5,ADGRF1
int200:chr19:11220410..11257018	158	354102	85509,148156,94025,125963,57693,390882,125962,390883,162998,26648,125958,84527,100529215,374879,7730,10781,147741,79088,7675,93134,54811,162993,59286,5300,54850,93145,50509,50700,55337,56342,692312,5032,83854,8666,1786,51073,3383,9294,3386,7087,100125288,112812,125950,3385,7297,5141,11140,9817,84971,53637,57153,65095,1032,10053,3609,81890,1785,255809,10498,11018,90580,6597,78992,3949,147841,25959…	MBD3L1,ZNF558,MUC16,OR1M1,ZNF317,OR7G2,OR7G1,OR7G3,OR7D2,OR7E24,OR7D4,ZNF559,ZNF559-ZNF177,ZNF699,ZNF177,ZNF266,ZNF560,ZNF426,ZNF121,ZNF561,ZNF562,ZNF846,UBL5,PIN1,FBXL12,OLFM2,COL5A3,RDH8,C19ORF66,PPAN,PPAN-P2RY11,P2RY11,ANGPTL6,EIF3G,DNMT1,MRPL4,ICAM1,S1PR2,ICAM4,ICAM5,ZGLP1,FDX1L,RAVER1,ICAM3,TYK2,PDE4A,CDC37,KEAP1,ATG4D,S1PR5,SLC44A2,KRI1,CDKN2D,AP1M2,ILF3,QTRT1,DNM2,C19ORF38,CARM1,TMED1,C19O…
int201:chr5:60603462..60842210	266	91934	57688	ZSWIM6
int202:chr13:60130083..60406796	450	356732	81624	DIAPH3
int203:chr6:19827389..19827389	1	3780332	3400	ID4
int205:chr16:75152826..75211347	231	455898	79726,84937,162239,197257,1504,440387,9564,10428,124491,4166,11345,23563,79583,54386,23536,3735	WDR59,ZNRF1,ZFP1,LDHD,CTRB1,CTRB2,BCAR1,CFDP1,TMEM170A,CHST6,GABARAPL2,CHST5,TMEM231,TERF2IP,ADAT1,KARS
int206:chr12:53716133..53929672	266	142643	144501,3855,283403,3892,3887,3889,3891,3890,3888,9119,3854,286887,3853,3852,112802,121391,140807,319101,3849,3848,374454,51350,3850,3851,338785,196374,3856,3875,1975,23371,3489,8435,84926,283337,51380,3695,84975,5916,9700,5204,60314,8086,121340,6667,269,54458,5094,6895,7786,8620,11016,517,57658	KRT80,KRT7,C12ORF80,KRT86,KRT81,KRT83,KRT85,KRT84,KRT82,KRT75,KRT6B,KRT6C,KRT6A,KRT5,KRT71,KRT74,KRT72,KRT73,KRT2,KRT1,KRT77,KRT76,KRT3,KRT4,KRT79,KRT78,KRT8,KRT18,EIF4B,TNS2,IGFBP6,SOAT2,SPRYD3,ZNF740,CSAD,ITGB7,MFSD5,RARG,ESPL1,PFDN5,C12ORF10,AAAS,SP7,SP1,AMHR2,PRR13,PCBP2,TARBP2,MAP3K12,NPFF,ATF7,ATP5G2,CALCOCO1
int207,int65:chr14:99140055..99270397	412	787545	283598	C14ORF177
int20:chr5:1099300..1115398	56	544706	79844,9319,65980,85409,10723,340024,348932,7015,81037,6531,79888	ZDHHC11,TRIP13,BRD9,NKD2,SLC12A7,SLC6A19,SLC6A18,TERT,CLPTM1L,SLC6A3,LPCAT1
int21,int366:chr3:153587256..154132927	1501	876772	26084,170506,344758	ARHGEF26,DHX36,GPR149
int210:chr6:16714217..16753147	94	686377	2766,6310	GMPR,ATXN1
int211:chr20:44779565..44813304	79	651528	57158,51526,78997,140902,3172,128486,79183,11142,10955,100,8839,60598,140730,7529,80336,6789,10953,3787,149708,128488,5266,6406,6407,6590,11317,8785,90196,6385,55861,51604,27296,10406,10816,140870,100526773,57119,90199,140832,259240,259239,164237,391253,280664,116092,11065,140686,90203,140831,7125,90204,5476,10005,63935,128497,140825,5360,63925,4318,57468,57727,958,64405,51006,63916	JPH2,OSER1,GDAP1L1,R3HDML,HNF4A,FITM2,TTPAL,PKIG,SERINC3,ADA,WISP2,KCNK15,RIMS4,YWHAB,PABPC1L,STK4,TOMM34,KCNS1,WFDC5,WFDC12,PI3,SEMG1,SEMG2,SLPI,RBPJL,MATN4,SYS1,SDC4,DBNDD2,PIGT,TP53TG5,WFDC2,SPINT3,WFDC6,EPPIN-WFDC6,EPPIN,WFDC8,WFDC10A,WFDC9,WFDC11,WFDC13,SPINT4,WFDC10B,DNTTIP1,UBE2C,WFDC3,SNX21,ZSWIM3,TNNC2,ZSWIM1,CTSA,ACOT8,PCIF1,SPATA25,NEURL2,PLTP,ZNF335,MMP9,SLC12A5,NCOA5,CD40,CDH22,SLC35…
int212:chr2:132625252..132692267	181	804991	29798,408029	C2ORF27A,C2ORF27B
int213:chr5:171260919..171274885	39	607057	23291,6793,285588,92181,285590	FBXW11,STK10,EFCAB9,UBTD2,SH3PXD2B
int214:chr15:34106037..34158266	140	767555	653125,728047,643699,9824,6447,26585,342184,6263,57099,1133,161779,56851,79768,51234,9990,256646,55505,254531,23015	GOLGA8K,GOLGA8O,GOLGA8N,ARHGAP11A,SCG5,GREM1,FMN1,RYR3,AVEN,CHRM5,PGBD4,EMC7,KATNBL1,EMC4,SLC12A6,NUTM1,NOP10,LPCAT4,GOLGA8A
int215:chr6:113973847..114133862	531	717694	4082	MARCKS
int221,int448,int141:chr7:129433365..129594320	506	797000	7328,51530,23008,136263,84928,1358,51200,93979,1357,95681,4232,26958,114960,136259	UBE2H,ZC3HC1,KLHDC10,SSMEM1,TMEM209,CPA2,CPA4,CPA5,CPA1,CEP41,MEST,COPG2,TSGA13,KLF14
int226:chr4:103610517..103610517	1	3780332	4790,4126,7323,493856,150159,133308,56898,1062	NFKB1,MANBA,UBE2D3,CISD2,SLC9B1,SLC9B2,BDH2,CENPE
int229:chr6:6353056..6375309	70	629774	2162	F13A1
int233,int964:chr19:53743855..53780026	155	362046	90338,55786,84671,79788,317701,342926,317703,91664,112401,91661,388561,126017,55422,503834	ZNF160,ZNF415,ZNF347,ZNF665,VN1R2,ZNF677,VN1R4,ZNF845,BIRC8,ZNF765,ZNF761,ZNF813,ZNF331,DPRX
int234:chr8:94306996..94698775	650	360302	137392,91147,389677	FAM92A1,TMEM67,RBM12B
int236:chr16:66874574..66874574	1	3780332	1003,146227,51192,100529251,7084,113540,146225,123920,146223,1783,283847,766,8883,57546,8824,1014,23491,6236,51647,283848,865,80262,55336,3299,8996,1874,84752,79767,8717,653319,29100,283849,6553,26231,25894,29109,55282,146212,3291,51673,29800,9114,79567,181,10664,146206,50855,388284,65057,84080,81577,57610,55815,57215,10204,23644,80152,123904,5681,1506,5699,3931,6560,54920,64180,64174,100131303,5…	CDH5,BEAN1,CKLF,CKLF-CMTM1,TK2,CMTM1,CMTM2,CMTM3,CMTM4,DYNC1LI2,CCDC79,CA7,NAE1,PDP2,CES2,CDH16,CES3,RRAD,FAM96B,CES4A,CBFB,C16ORF70,FBXL8,HSF4,NOL3,E2F4,B3GNT9,ELMO3,TRADD,KIAA0895L,TMEM208,EXOC3L1,SLC9A5,LRRC29,PLEKHG4,FHOD1,LRRC36,KCTD19,HSD11B2,TPPP3,ZDHHC1,ATP6V0D1,FAM65A,AGRP,CTCF,RLTPR,PARD6A,C16ORF86,ACD,ENKD1,GFOD2,RANBP10,TSNAXIP1,THAP11,NUTF2,EDC4,CENPT,NRN1L,PSKH1,CTRL,PSMB10,LCAT,SLC…
int242:chr5:170284624..170694033	592	199579	133874,3937,30820,3779,2568,64901,30012,4869,8817	C5ORF58,LCP2,KCNIP1,KCNMB1,GABRP,RANBP17,TLX3,NPM1,FGF18
int244:chr15:35341836..35395583	140	767145	57369,70,9716,54989	GJD2,ACTC1,AQR,ZNF770
int247:chr1:2944527..2990994	109	694342	140625,63976,27237,1953,127262,7161,49856,148870,388588,57470,1677,9731,339448	ACTRT2,PRDM16,ARHGEF16,MEGF6,TPRG1L,TP73,WRAP73,CCDC27,SMIM1,LRRC47,DFFB,CEP104,C1ORF174
int24:chr12:101279586..101373845	250	859104	121601,160728,27340,400	ANO4,SLC5A8,UTP20,ARL1
int25,int92:chr12:3890095..4001019	277	859395	56341,84766,57097	PRMT8,CRACR2A,PARP11
int251:chr18:20897698..21368907	647	148248	91768,85019,8780,29919,4864,147463,3909,125488,26256,114876,55364,59340	CABLES1,TMEM241,RIOK3,C18ORF8,NPC1,ANKRD29,LAMA3,TTC39C,CABYR,OSBPL1A,IMPACT,HRH4
int255:chr12:130345983..130365179	30	306766	121256	TMEM132D
int256:chr14:31347709..31353247	13	458105	1690,29966,11154,25831,25938,112487,2856,80224	COCH,STRN3,AP4S1,HECTD1,HEATR5A,DTD2,GPR33,NUBPL
int257:chr6:147156451..147239784	182	704458	10981,79747	RAB32,ADGB
int258:chr13:24482512..24494811	74	161090	4285,542767,387911,221178,338872	MIPEP,C1QTNF9B-AS1,C1QTNF9B,SPATA13,C1QTNF9
int261:chr11:57989089..58437328	1129	919112	219956,219952,219954,219957,219959,219958,219960,81341,219965,441608,390190,390191,219968,9404,80829,1270	OR9Q1,OR6Q1,OR9I1,OR9Q2,OR1S1,OR1S2,OR10Q1,OR10W1,OR5B17,OR5B3,OR5B2,OR5B12,OR5B21,LPXN,ZFP91,CNTF
int263:chr3:112948233..113007525	107	469273	91653,55779,152185,54847,205717,523,80218,54762,254887,57577,79691,1814,7634,201633,26137	BOC,CFAP44,SPICE1,SIDT1,USF3,ATP6V1A,NAA50,GRAMD1C,ZDHHC23,CCDC191,QTRTD1,DRD3,ZNF80,TIGIT,ZBTB20
int264:chr10:106387449..106758234	896	922961	22986	SORCS3
int265:chr5:130655526..131539255	957	21430	8974,8572,6583,6584	P4HA2,PDLIM4,SLC22A4,SLC22A5
int265:chr5:130655526..131539255	957	21430	90624,3094,56990,51735,96459,728637,23305,3562,1437	LYRM7,HINT1,CDC42SE2,RAPGEF6,FNIP1,MEIKIN,ACSL6,IL3,CSF2
int266,int601:chr12:65706289..65896957	235	140743	11197,23592,253827	WIF1,LEMD3,MSRB3
int267:chr10:48391129..48449237	92	337783	642517,653145,118738,5949,2658,2662	AGAP9,ANXA8,ZNF488,RBP3,GDF2,GDF10
int268:chr7:77862252..77953248	309	675207	9863	MAGI2
int269:chr19:55010778..55012790	18	110048	91662,91663,5582,59284,59283,59285,284415,4696,26121,441864,4849,126014,29844,79042,6203,79165,147798,79143,11025,79168,10990,10288,11026,353514,23547,3903,57348,114823,3904,94059,148170,11027,11024,10859,11006,115653,3804,3802,3805,3811,3809,3812,2204,9437,55655,199713,51206,54869,112724,54776,7138,7137,352909,6861,5794,255043,22870,84446,23640,84787,284417,147744,6158,125965,284418,3589,388564,…	NLRP12,MYADM,PRKCG,CACNG7,CACNG8,CACNG6,VSTM1,NDUFA3,PRPF31,TARM1,CNOT3,OSCAR,TFPT,TSEN34,RPS9,LENG1,TMC4,MBOAT7,LILRB3,LILRA6,LILRB5,LILRB2,LILRA3,LILRA5,LILRA4,LAIR1,TTYH1,LENG8,LAIR2,LENG9,CDC42EP5,LILRA2,LILRA1,LILRB1,LILRB4,KIR3DL3,KIR2DL3,KIR2DL1,KIR2DL4,KIR3DL1,KIR2DS4,KIR3DL2,FCAR,NCR1,NLRP2,NLRP7,GP6,EPS8L1,RDH13,PPP1R12C,TNNT1,TNNI3,DNAAF3,SYT5,PTPRH,TMEM86B,PPP6R1,BRSK1,HSPBP1,SUV420H2…
int27,int195:chr5:153573938..153690010	426	554500	55568,79685,9421	GALNT10,SAP30L,HAND1
int270:chr15:57244382..57244382	1	3780332	6938,84952,100820829,145781,81488	TCF12,CGNL1,MYZAP,GCOM1,POLR2M
int271:chr21:40135124..40217615	228	836887	2114	ETS2
int273,int989:chr7:1442088..1479952	124	649761	79778,26173,7975,202915,84262,392617	MICALL2,INTS1,MAFK,TMEM184A,PSMG3,ELFN1
int275,int488,int178,int78,int259,int715,int886,int432,int23,int598,int745,int325,int196:chr8:8088877..11886722	13907	2743	9258,90459	MFHAS1,ERI1
int275,int488,int178,int78,int259,int715,int886,int432,int23,int598,int745,int325,int196:chr8:8088877..11886722	13907	2743	2626,252969,2222,1508,613209,613210,613211,728957,100133267,392197,377630,85002	GATA4,NEIL2,FDFT1,CTSB,DEFB135,DEFB136,DEFB134,ZNF705D,LOC100133267,USP17L7,USP17L2,FAM86B1
int275,int488,int178,int78,int259,int715,int886,int432,int23,int598,int745,int325,int196:chr8:8088877..11886722	13907	2743	157285	SGK223
int275,int488,int178,int78,int259,int715,int886,int432,int23,int598,int745,int325,int196:chr8:8088877..11886722	13907	2743	137075	CLDN23
int275,int488,int178,int78,int259,int715,int886,int432,int23,int598,int745,int325,int196:chr8:8088877..11886722	13907	2743	83648,640	FAM167A,BLK
int275,int488,int178,int78,int259,int715,int886,int432,int23,int598,int745,int325,int196:chr8:8088877..11886722	13907	2743	79660	PPP1R3B
int275,int488,int178,int78,int259,int715,int886,int432,int23,int598,int745,int325,int196:chr8:8088877..11886722	13907	2743	4482	MSRA
int275,int488,int178,int78,int259,int715,int886,int432,int23,int598,int745,int325,int196:chr8:8088877..11886722	13907	2743	94137,203076,83595,54984,286046,66036,83650	RP1L1,C8ORF74,SOX7,PINX1,XKR6,MTMR9,SLC35G5
int275,int488,int178,int78,int259,int715,int886,int432,int23,int598,int745,int325,int196:chr8:8088877..11886722	13907	2743	203074	PRSS55
int275,int488,int178,int78,int259,int715,int886,int432,int23,int598,int745,int325,int196:chr8:8088877..11886722	13907	2743	8658	TNKS
int277:chr2:208542914..208560343	44	611292	1385,151194,151195,7855,389072	CREB1,METTL21A,CCNYL1,FZD5,PLEKHM3
int279,int278:chr22:32977782..33041767	239	532888	3976,5008,652968,83874,550631,10291,23541,51537,200312,266629,284904,730005,9514,6948,23481,339665,23762,150290,22880,6525,27124,140606,91445,50487,3985,113791,23598,4733,56478,9814,23761,253143,9681,7533,25775,6523,150297,10739,6527,10738,51493,254240,25793,8224,7078	LIF,OSM,GATSL3,TBC1D10A,CCDC157,SF3A1,SEC14L2,MTFP1,RNF215,SEC14L3,SEC14L4,SEC14L6,GAL3ST1,TCN2,PES1,SLC35E4,OSBP2,DUSP18,MORC2,SMTN,INPP5J,SELM,RNF185,PLA2G3,LIMK2,PIK3IP1,PATZ1,DRG1,EIF4ENIF1,SFI1,PISD,PRR14L,DEPDC5,YWHAH,C22ORF24,SLC5A1,C22ORF42,RFPL2,SLC5A4,RFPL3,RTCB,BPIFC,FBXO7,SYN3,TIMP3
int280:chr13:29138398..29148653	32	565709	3651,1045,646625,2322,255967,2321	PDX1,CDX2,URAD,FLT3,PAN3,FLT1
int281:chr22:42905055..42920541	74	285934	150372,253190,27341,84271,1727,267020,53947,26286,11252,25809,638,706,27349,23170,80274,758,64800,25830,80339,150379,25813,29780,64098,85352	NFAM1,SERHL2,RRP7A,POLDIP3,CYB5R3,ATP5L2,A4GALT,ARFGAP3,PACSIN2,TTLL1,BIK,TSPO,MCAT,TTLL12,SCUBE1,MPPED1,EFCAB6,SULT4A1,PNPLA3,PNPLA5,SAMM50,PARVB,PARVG,KIAA1644
int284:chr15:70428667..70434356	19	506386	7090	TLE3
int289:chr9:24573717..24719895	287	627126	100129669	IZUMO3
int290,int71:chr1:161976234..162111400	325	862331	114836,8832,6504,962,57823,4063,51744,55600,142683,50848,100131187,7391,257106,126823,4817,81607,5202,51506,27005,5498,9191,4720,2207,8703,84134,9507,654790,336,9970,6391,4359,257177,2212,3310,9103,2214,2213,2215,84824,127943,11266,22926,25903,9722,400793,284680,117157,127933,6675,4921,51478	SLAMF6,CD84,SLAMF1,CD48,SLAMF7,LY9,CD244,ITLN1,ITLN2,F11R,TSTD1,USF1,ARHGAP30,KLHDC9,NIT1,PVRL4,PFDN2,UFC1,USP21,PPOX,DEDD,NDUFS2,FCER1G,B4GALT3,TOMM40L,ADAMTS4,PCP4L1,APOA2,NR1I3,SDHC,MPZ,CFAP126,FCGR2A,HSPA6,FCGR2C,FCGR3A,FCGR2B,FCGR3B,FCRLA,FCRLB,DUSP12,ATF6,OLFML2B,NOS1AP,C1ORF226,C1ORF111,SH2D1B,UHMK1,UAP1,DDR2,HSD17B7
int292:chr13:114138733..114302622	540	728437	10426,400165,23250,23263,2155,2159,8858,8451,55795,3916,79774,101928841,113622,55002,55208,7027,6011,496,348013,2621,643365	TUBGCP3,ATP11AUN,ATP11A,MCF2L,F7,F10,PROZ,CUL4A,PCID2,LAMP1,GRTP1,LOC101928841,ADPRHL1,TMCO3,DCUN1D2,TFDP1,GRK1,ATP4B,TMEM255B,GAS6,LINC00452
int294:chr21:38458048..38598090	322	825668	23562,6493,3141,53820,7267,51227,10311,1859	CLDN14,SIM2,HLCS,RIPPLY3,TTC3,PIGP,DSCR3,DYRK1A
int296,int629,int961:chr10:78778734..79019060	563	906540	3778	KCNMA1
int297:chr15:23931507..23949863	30	337139	54551,4692	MAGEL2,NDN
int299:chr13:98966784..99020971	180	665482	10160,140432,8428	FARP1,RNF113B,STK24
int29:chr6:89388023..89633046	430	470229	8732,10957,135295,135293,2569,2570,51465,58528,22881,57226,23195,9994,84694,60468	RNGTT,PNRC1,SRSF12,PM20D2,GABRR1,GABRR2,UBE2J1,RRAGD,ANKRD6,LYRM2,MDN1,CASP8AP2,GJA10,BACH2
int300:chr21:42436332..42489796	224	376036	25825,191585,54097,4600,4599,7113	BACE2,PLAC4,FAM3B,MX2,MX1,TMPRSS2
int301:chr15:29450081..29462476	40	568854	321,23359,56160	APBA2,FAM189A1,NDNL2
int303:chr13:96058183..96087296	106	535522	10257,9071,22873,5611,55757,266722	ABCC4,CLDN10,DZIP1,DNAJC3,UGGT2,HS6ST3
int305:chr8:80582607..80582607	1	3780332	11075	STMN2
int307:chr21:46074565..46139210	358	102719	23308,326,29947,5211,7226,755,81543,54084,386672,386677,386679,386675,386682,386681,386676,386680,353333,386674,386678,386683,386685,386684,353323,353332,7327,6612,754,3689,85395	ICOSLG,AIRE,DNMT3L,PFKL,TRPM2,C21ORF2,LRRC3,TSPEAR,KRTAP10-4,KRTAP10-1,KRTAP10-2,KRTAP10-7,KRTAP10-3,KRTAP10-8,KRTAP10-9,KRTAP10-5,KRTAP10-10,KRTAP10-6,KRTAP10-11,KRTAP12-3,KRTAP10-12,KRTAP12-4,KRTAP12-2,KRTAP12-1,UBE2G2,SUMO3,PTTG1IP,ITGB2,FAM207A
int309,int456,int686:chr9:9209799..9440297	1011	184133	5789	PTPRD
int310:chr2:64885133..64914631	50	383938	29094,54812,9792	LGALSL,AFTPH,SERTAD2
int312:chr5:108990708..109220991	651	935769	4124	MAN2A1
int319:chr9:132265328..132309588	200	292526	28989,375759,51450,140459,9536,27348,10868,1861,51759,23048,57720,23413,256158,445,8939,59335,23404,25,347148,84929,10319,83543,8021,84814,286336	NTMT1,C9ORF50,PRRX2,ASB6,PTGES,TOR1B,USP20,TOR1A,C9ORF78,FNBP1,GPR107,NCS1,HMCN2,ASS1,FUBP3,PRDM12,EXOSC2,ABL1,QRFP,FIBCD1,LAMC3,AIF1L,NUP214,PLPP7,FAM78A
int320:chr1:13954726..13956807	9	390174	126755,10630,7799	LRRC38,PDPN,PRDM2
int322:chr11:114040325..114092582	187	578859	80975,644672,9183,57646,9177,3359,7704,4837,10179,25996,54494	TMPRSS5,CLDN25,ZW10,USP28,HTR3B,HTR3A,ZBTB16,NNMT,RBM7,REXO2,C11ORF71
int324,int830:chr7:12139784..12309141	889	74319	54664	TMEM106B
int326:chr15:78563735..78563735	1	3780332	23102,646892,3419,10518,23205,55466,80349,1381,3658,123688,5685,1138,1136,1143	TBC1D2B,SH2D7,IDH3A,CIB2,ACSBG1,DNAJA4,WDR61,CRABP1,IREB2,HYKK,PSMA4,CHRNA5,CHRNA3,CHRNB4
int329:chr19:39475140..39545986	438	42128	57677,284406,84924,339324,57711,84911,92283,163081,728485,342892,25850,388536,374900,374899,147923,199704,163087,92285,284459,84503,148266,148268,390927,163255,51276,22835,163115,84775,126231,23094,83889,8193,10653,94274,64073,9424,57828,90522,5714,399473,147965,6261,199720,115727,27335,11184,81,147968,653499,3963,3960,1891,3191,4793,126432,22933,6183,643669,54938,115290,126433,390928,10298,34289…	ZFP14,ZFP82,ZNF566,ZNF260,ZNF529,ZNF382,ZNF461,ZNF567,LOC728485,ZNF850,ZNF345,ZNF790,ZNF568,ZNF829,ZNF420,ZNF585A,ZNF383,ZNF585B,HKR1,ZNF527,ZNF569,ZNF570,ZNF793,ZNF540,ZNF571,ZFP30,ZNF781,ZNF607,ZNF573,SIPA1L3,WDR87,DPF1,SPINT2,PPP1R14A,C19ORF33,KCNK6,CATSPERG,YIF1B,PSMD8,SPRED3,FAM98C,RYR1,GGN,RASGRP4,EIF3K,MAP4K1,ACTN4,CAPN12,LGALS7B,LGALS7,LGALS4,ECH1,HNRNPL,NFKBIB,RINL,SIRT2,MRPS12,CCER2,SAR…
int332,int57:chr2:23585786..23689034	262	860893	114818	KLHL29
int338:chr11:15774451..16059173	433	278384	55553	SOX6
int33:chr7:114593865..114747072	276	503792	29969	MDFIC
int34,int982:chr4:152728941..152958691	604	969729	729830,5188	FAM160A1,GATB
int340:chr12:117999874..118004024	8	327946	283455,5985,55884,54621,5037,51347,64426	KSR2,RFC5,WSB2,VSIG10,PEBP1,TAOK3,SUDS3
int341,int67,int535:chr10:61562977..61808880	752	185151	220963,100507027,8030	SLC16A9,MRLN,CCDC6
int341,int67,int535:chr10:61562977..61808880	752	185151	288,983	ANK3,CDK1
int343:chr1:231334780..231346779	22	392836	22796,10753,183,84886,79573,64801,375061,440730,149373,8443,128061,83932,149371,54583,7257,27185	COG2,CAPN9,AGT,C1ORF198,TTC13,ARV1,FAM89A,TRIM67,LOC149373,GNPAT,C1ORF131,SPRTN,EXOC8,EGLN1,TSNAX,DISC1
int345,int973:chr17:18662965..18831432	468	916501	254272,729288,147166,10517,51030,5636,125206,644815,10750,388436,400581,22905,5598,27077,7732,4239	TBC1D28,ZNF286B,TRIM16L,FBXW10,TVP23B,PRPSAP2,SLC5A10,FAM83G,GRAP,LOC388436,GRAPL,EPN2,MAPK7,B9D1,RNF112,MFAP4
int349:chr15:97312002..97323225	58	245412	145946	SPATA8
int350,int877:chr2:141959134..142485218	1875	358939	53353	LRP1B
int352:chr2:166415099..166422010	8	127752	6328,6326,80034	SCN3A,SCN2A,CSRNP3
int354:chr11:98722894..98857006	519	455422	53942	CNTN5
int355:chr7:34943327..35238530	665	220252	57057	TBX20
int355:chr7:34943327..35238530	665	220252	23333	DPY19L1
int358:chr1:192991783..193429853	435	44042	6738,51377,79577,51022,8707	TROVE2,UCHL5,CDC73,GLRX2,B3GALT2
int359,int140:chr10:49842179..49902125	159	788496	143162,5599,58504,57705,474354,196740,170370,170371,118461,644168,2074,267004,101243544,1103,6572,282966,55753,8505,100652748,4477,8031,100287932,414189,387680	FRMPD2,MAPK8,ARHGAP22,WDFY4,LRRC18,VSTM4,FAM170B,C10ORF128,C10ORF71,DRGX,ERCC6,PGBD3,ERCC6-PGBD3,CHAT,SLC18A3,C10ORF53,OGDHL,PARG,TIMM23B,MSMB,NCOA4,TIMM23,AGAP6,FAM21A
int360:chr12:110060137..110740470	929	62551	11153,23479,9733,338773,6404,23603,54434,1610,55530,84749,7374,121642,32,121643,283446,89910,83892,4598,326625	FICD,ISCU,SART3,TMEM119,SELPLG,CORO1C,SSH1,DAO,SVOP,USP30,UNG,ALKBH2,ACACB,FOXN4,MYO1H,UBE3B,KCTD10,MVK,MMAB
int360:chr12:110060137..110740470	929	62551	84915,59341,84260,51228,9815,88455,400073,28981,488,51434,29902,10094,144715,51184,51699,160760,79600,84329,5501,160762,4633,23316,10019,144717,6311,80724,8315,217,8550,89894,10961,80018,10906,283450,5781,6128	FAM222A,TRPV4,TCHP,GLTP,GIT2,ANKRD13A,C12ORF76,IFT81,ATP2A2,ANAPC7,FAM216A,ARPC3,RAD9B,GPN3,VPS29,PPTC7,TCTN1,HVCN1,PPP1CC,CCDC63,MYL2,CUX2,SH2B3,FAM109A,ATXN2,ACAD10,BRAP,ALDH2,MAPKAPK5,TMEM116,ERP29,NAA25,TRAFD1,HECTD4,PTPN11,RPL6
int361:chr11:3108506..3108506	1	3780332	3481,723961,3630,7054,10077,430,29125,975,10078,3784,29850,5002,1028,5003,7262,4676,833,114879,386746,116534	IGF2,INS-IGF2,INS,TH,TSPAN32,ASCL2,C11ORF21,CD81,TSSC4,KCNQ1,TRPM5,SLC22A18,CDKN1C,SLC22A18AS,PHLDA2,NAP1L4,CARS,OSBPL5,MRGPRG,MRGPRE
int364:chr7:1877501..2247496	990	965139	8379,4521,29960,29886,8662,55501,3955,402635,23288,221927,80727,155185,2768,84433	MAD1L1,NUDT1,FTSJ2,SNX8,EIF3B,CHST12,LFNG,GRIFIN,IQCE,BRAT1,TTYH3,AMZ1,GNA12,CARD11
int365:chr9:75798406..76200815	731	489096	301	ANXA1
int369,int465,int874:chr6:143919229..144207531	689	930804	8504,134637,2519,9749,84946,153918,5325,83443,8676	PEX3,ADAT2,FUCA2,PHACTR2,LTV1,ZC2HC1B,PLAGL1,SF3B5,STX11
int36:chr1:37202097..37261085	86	268983	2899	GRIK3
int373:chr11:108478047..108497245	51	634927	6588,54733,54734,8065,38,4863,472,160140,143888,23086,1662	SLN,SLC35F2,RAB39A,CUL5,ACAT1,NPAT,ATM,C11ORF65,KDELC2,EXPH5,DDX10
int374:chr12:33451588..34844133	2993	549356	84920	ALG10
int374:chr12:33451588..34844133	2993	549356	341359	SYT10
int376:chr9:14366507..14373886	14	377117	4781	NFIB
int377:chr19:52838968..52883416	165	526674	84765,79898,65251,59348,284370,80110,9668,284371,90317,5518,162962,90321,147657,162963,400713,84436,147658,147660,388558,55762,55769,81856,162966,7576,90333,162967,388559,100529240,125893,147664	ZNF577,ZNF613,ZNF649,ZNF350,ZNF615,ZNF614,ZNF432,ZNF841,ZNF616,PPP2R1A,ZNF836,ZNF766,ZNF480,ZNF610,ZNF880,ZNF528,ZNF534,ZNF578,ZNF808,ZNF701,ZNF83,ZNF611,ZNF600,ZNF28,ZNF468,ZNF320,ZNF888,ZNF816-ZNF321P,ZNF816,ERVV-1
int378:chr15:96835281..96866320	68	598484	7026	NR2F2
int379:chr3:133780030..134017219	533	155234	55573,11073,7018,58477,51560,80111,6578	CDV3,TOPBP1,TF,SRPRB,RAB6B,C3ORF36,SLCO2A1
int379:chr3:133780030..134017219	533	155234	6259	RYK
int382:chr7:6646145..6646145	1	3780332	26100,222962,84629,80028,60,6624,54476,654231,51622,7965,5395,100310846,27102,84132,9265,5879,84792,221955,11014,392862,55146,79034,54753,100131017,7559,222967,221960	WIPI2,SLC29A4,TNRC18,FBXL18,ACTB,FSCN1,RNF216,OCM,CCZ1,AIMP2,PMS2,ANKRD61,EIF2AK1,USP42,CYTH3,RAC1,FAM220A,DAGLB,KDELR2,GRID2IP,ZDHHC4,C7ORF26,ZNF853,ZNF316,ZNF12,RSPH10B,CCZ1B
int383:chr7:104524092..105087973	901	119781	5001,375612	ORC5,LHFPL3
int383:chr7:104524092..105087973	901	119781	55904,6733,54517,60561,222255,222256	KMT2E,SRPK2,PUS7,RINT1,ATXN7L1,CDHR3
int385:chr14:56521676..56591404	207	781938	57161	PELI2
int387:chr9:101858054..101931740	117	343371	1306,7046,10952,85365	COL15A1,TGFBR1,SEC61B,ALG2
int388:chr1:114726064..114731913	31	256765	148281	SYT6
int389:chr1:230540900..230619350	179	744466	2590,79605	GALNT2,PGBD5
int38:chr10:35878148..35909646	58	457785	8453,1390,219771,219770,8325	CUL2,CREM,CCNY,GJD4,FZD8
int39,int109:chr5:179601491..179617225	62	445509	80230,3187,285679,821,646019,9794,4056,8878,11282,51149,23061,55819,255426,5601,9945	RUFY1,HNRNPH1,C5ORF60,CANX,CBY3,MAML1,LTC4S,SQSTM1,MGAT4B,C5ORF45,TBC1D9B,RNF130,RASGEF1C,MAPK9,GFPT2
int391:chr2:237021346..237136992	397	670254	116987,2637,401036,79781,57007	AGAP1,GBX2,ASB18,IQCA1,ACKR3
int392:chr19:821102..830621	37	451163	8612,54531,51298,126567,25759,8174,91978,284451,997,3004,682,610,27006,5442,10272,55658,5064,400668,126353,5725,566,5657,1991,1675,79948,84634,10025,1820,91300,57418,116444,1265,10347,91304,23526,2879,5434,22904,6794,513,90007,1153,55009,255057,1943,84939,374291,26528,6209,2593,10297,92840,148223,126520,54760,339366,399664,53615,10975,6929,390874,148229,57455,83855,113179,113178,81926,1455,55643,…	PLPP2,MIER2,THEG,C2CD4C,SHC2,MADCAM1,TPGS1,ODF3L2,CDC34,GZMM,BSG,HCN2,FGF22,POLRMT,FSTL3,RNF126,PALM,PRSS57,MISP,PTBP1,AZU1,PRTN3,ELANE,CFD,PLPPR3,KISS1R,MED16,ARID3A,R3HDM4,WDR18,GRIN3B,CNN2,ABCA7,TMEM259,HMHA1,GPX4,POLR2E,SBNO2,STK11,ATP5D,MIDN,CIRBP,C19ORF24,CBARP,EFNA2,MUM1,NDUFS7,DAZAP1,RPS15,GAMT,APC2,REEP6,C19ORF25,PLK5,PCSK4,ADAMTSL5,MEX3D,MBD3,UQCR11,TCF3,ONECUT3,ATP8B3,REXO1,KLF16,ADAT3…
int394,int794,int346,int87,int639:chr18:9478794..9988562	1629	629239	4729,23253,57045,10928,9989,11031,84203,9218	NDUFV2,ANKRD12,TWSG1,RALBP1,PPP4R1,RAB31,TXNDC2,VAPA
int399:chr8:19987914..19987914	1	3780332	6570,526,11178	SLC18A1,ATP6V1B2,LZTS1
int400:chr2:3313428..3381189	294	317799	7260,51112,55256,6201,78989,246243,55821,728597	TSSC1,TRAPPC12,ADI1,RPS7,COLEC11,RNASEH1,ALLC,DCDC2C
int406:chr3:121342819..121727963	1030	377348	286676,942,846,1475,26355,131076,54554,3836,151636,165631,83666,54625,79663,84925,54437,10954,26984,111,201562,4638,64770,54763,8997,7372,3693,56667,57493,84561,7707,8723,114885	ILDR1,CD86,CASR,CSTA,FAM162A,CCDC58,WDR5B,KPNA1,DTX3L,PARP15,PARP9,PARP14,HSPBAP1,DIRC2,SEMA5B,PDIA5,SEC22A,ADCY5,HACD2,MYLK,CCDC14,ROPN1,KALRN,UMPS,ITGB5,MUC13,HEG1,SLC12A8,ZNF148,SNX4,OSBPL11
int406:chr3:121342819..121727963	1030	377348	9515,10721,503582,51725,3059,2804,9657,55840,6565	STXBP5L,POLQ,ARGFX,FBXO40,HCLS1,GOLGB1,IQCB1,EAF2,SLC15A2
int409:chr3:15775446..16066785	680	909431	6533,80852,51244,84077,152273,7182,64432,64145,23473,9467,85403,131965,8292,686,26061,23243	SLC6A6,GRIP2,CCDC174,C3ORF20,FGD5,NR2C2,MRPS25,RBSN,CAPN7,SH3BP5,EAF1,METTL6,COLQ,BTD,HACL1,ANKRD28
int410:chr11:115432255..115476687	164	533200	23705	CADM1
int411,int111:chr18:14673378..14791236	461	442282	374860	ANKRD30B
int412:chr12:8851557..8971968	101	38598	93978,338339,26253,57379,8076,57494,144568,1911,10219,4074	CLEC6A,CLEC4D,CLEC4E,AICDA,MFAP5,RIMKLB,A2ML1,PHC1,KLRG1,M6PR
int413:chr4:165824574..165835223	95	38909	100506013,152756,391712,166655,201931,11275,6307,1363	APELA,FAM218A,TRIM61,TRIM60,TMEM192,KLHL2,MSMO1,CPE
int415:chr9:79456175..79467292	44	439419	158471,442425	PRUNE2,FOXB2
int419:chr10:129769429..129824976	159	768635	5791,119467,4288	PTPRE,CLRN3,MKI67
int41:chr1:236899343..236938860	145	536596	4811,7107,56605,128178,3964,55127,88,4548	NID1,GPR137B,ERO1B,EDARADD,LGALS8,HEATR1,ACTN2,MTR
int421:chr14:77062591..77167620	271	868663	22846,145497,23357	VASH1,LRRC74A,ANGEL1
int425:chr15:23091857..23116232	48	494249	283767,114791,23191,81614,123606	GOLGA6L1,TUBGCP5,CYFIP1,NIPA2,NIPA1
int427:chr5:176998497..177106718	221	648878	90249,3101,51720,23567,2264,64324,27166,53917,83463,10636,10960,6569,2870,80758,345456,2161,1627,9260,79930,51428,54540,54732,11285	UNC5A,HK3,UIMC1,ZNF346,FGFR4,NSD1,PRELID1,RAB24,MXD3,RGS14,LMAN2,SLC34A1,GRK6,PRR7,PFN3,F12,DBN1,PDLIM7,DOK3,DDX41,FAM193B,TMED9,B4GALT7
int434,int464:chr14:23020706..23082027	331	122107	63874,1603	ABHD4,DAD1
int436:chr22:20031102..20162758	388	853485	5413,2812,6899,54584,79680,10587,1312,128989,421,54487,5902,29801,27037,388849	SEPT5,GP1BB,TBX1,GNB1L,C22ORF29,TXNRD2,COMT,TANGO2,ARVCF,DGCR8,RANBP1,ZDHHC8,TRMT2A,CCDC188
int437,int428,int5,int514:chr6:43082651..43396608	531	406445	116113,4188,7942,29964,5225,100188893,10817,25862,705,9477,896,129685,647024,2978,2979,55173,55809,23304,5961,6903,23506,285855,171558,10695,441150,27232,5528,5190,116138,88745,89953,4201,5754,9820,51069,6722,23113,84630,10591,10864,401262,24149,89845,93643,65989,9533,221424,25844,57510,5429,9587,221421,54676,55168,7422	FOXP4,MDFI,TFEB,PRICKLE4,PGC,TOMM6,FRS3,USP49,BYSL,MED20,CCND3,TAF8,C6ORF132,GUCA1A,GUCA1B,MRPS10,TRERF1,UBR2,PRPH2,TBCC,GLTSCR1L,RPL7L1,PTCRA,CNPY3,C6ORF226,GNMT,PPP2R5D,PEX6,KLHDC3,RRP36,KLC4,MEA1,PTK7,CUL7,MRPL2,SRF,CUL9,TTBK1,DNPH1,SLC22A7,CRIP3,ZNF318,ABCC10,TJAP1,DLK2,POLR1C,LRRC73,YIPF3,XPO5,POLH,MAD2L1BP,RSPH9,GTPBP2,MRPS18A,VEGFA
int438:chr7:55165996..55165996	1	3780332	1956	EGFR
int439:chr8:102474371..102488478	41	606812	79977,83988,50484,51366,4956	GRHL2,NCALD,RRM2B,UBR5,ODF1
int440:chr15:102085503..102093632	21	539916	22856,55829,6627,5046	CHSY1,VIMP,SNRPA1,PCSK6
int441:chr10:127804531..127820570	51	594836	387718,26098,118856,56647,7390,55760,92565,8038,118611	TEX36,EDRF1,MMP21,BCCIP,UROS,DHX32,FANK1,ADAM12,C10ORF90
int443:chr13:113745941..113745941	1	3780332	10426,400165,23250,23263,2155,2159,8858,8451,55795,3916,79774,101928841,113622,55002,55208,7027,6011,496,348013,2621,643365	TUBGCP3,ATP11AUN,ATP11A,MCF2L,F7,F10,PROZ,CUL4A,PCID2,LAMP1,GRTP1,LOC101928841,ADPRHL1,TMCO3,DCUN1D2,TFDP1,GRK1,ATP4B,TMEM255B,GAS6,LINC00452
int446:chr14:53665735..53868813	801	362839	57544,283554,30001,5706,6815,64841,10979,80821	TXNDC16,GPR137C,ERO1A,PSMC6,STYX,GNPNAT1,FERMT2,DDHD1
int447,int959:chr8:102749568..103193781	944	730239	79977,83988,50484,51366,4956	GRHL2,NCALD,RRM2B,UBR5,ODF1
int449:chr3:107823224..108545856	1783	649541	84666,50852	RETNLB,TRAT1
int449:chr3:107823224..108545856	1783	649541	961,55081,11148,22989,9666,57650	CD47,IFT57,HHLA2,MYH15,DZIP3,KIAA1524
int44:chr3:6880004..6902624	64	656806	2917	GRM7
int451:chr15:81484720..81484720	1	3780332	161502,3603,80765,342125	CFAP161,IL16,STARD5,TMC3
int452:chr6:168527603..168531726	16	438727	4301,3834,100128124,79981	MLLT4,KIF25,HGC6.3,FRMD1
int454:chr1:19093325..19100178	30	368830	5081	PAX7
int455:chr6:51803149..51826281	62	656192	5314,3605	PKHD1,IL17A
int460:chr14:72471274..72487872	45	622000	9628	RGS6
int462:chr11:44106142..44285857	301	409354	390110,84680,2132,60529	ACCSL,ACCS,EXT2,ALX4
int463:chr2:47307630..47307640	2	42678	57217,90411,285051,805	TTC7A,MCFD2,C2ORF61,CALM2
int468:chr2:233465847..233523617	163	778187	129563,4880,250,251,248,646960,1144,9427,1146,9470,200765,80303,26058,3769,389084,25791,4759,3635,55054,6295,8527,55230,54576,54575,54600,54577,54578,54579,54657,54659,54658,339766,414061,55355,79054,6694	DIS3L2,NPPC,ALPP,ALPPL2,ALPI,PRSS56,CHRND,ECEL1,CHRNG,EIF4E2,TIGD1,EFHD1,GIGYF2,KCNJ13,C2ORF82,NGEF,NEU2,INPP5D,ATG16L1,SAG,DGKD,USP40,UGT1A8,UGT1A10,UGT1A9,UGT1A7,UGT1A6,UGT1A5,UGT1A4,UGT1A3,UGT1A1,MROH2A,DNAJB3,HJURP,TRPM8,SPP2
int471:chr12:51983427..52209780	270	30019	79657,8909,55652,10411,51564,7421,79022,1280,29843,5213,387856,140461,121275,341567,121274,23519,121273,341568,3906,54934,904,784,112,9416,85478,27289,51303,7471,377,7480,23109,5571,8085,121268,50846,55716,10376,84790,7846,5630,10024,79962,65244,338761,23416,10445,25766,84070,91010,7009,57701,144233,23017,359,362,363,29127,41,6602,2819,84987,91012,51474,121006,113251,57609,466,283471,25840,613227…	RPAP3,ENDOU,SLC48A1,RAPGEF3,HDAC7,VDR,TMEM106C,COL2A1,SENP1,PFKM,CCDC184,ASB8,OR10AD1,H1FNT,ZNF641,ANP32D,C12ORF54,OR8S1,LALBA,KANSL2,CCNT1,CACNB3,ADCY6,DDX23,CCDC65,RND1,FKBP11,WNT1,ARF3,WNT10B,DDN,PRKAG1,KMT2D,RHEBL1,DHH,LMBR1L,TUBA1B,TUBA1C,TUBA1A,PRPH,TROAP,DNAJC22,SPATS2,C1QL4,KCNH3,MCRS1,PRPF40B,FAM186B,FMNL3,TMBIM6,NCKAP5L,BCDIN3D,FAIM2,AQP2,AQP5,AQP6,RACGAP1,ASIC1,SMARCD1,GPD1,COX14,CERS5…
int473:chr6:50491551..50934086	882	633626	83741,7021	TFAP2D,TFAP2B
int474:chr2:222225453..222272013	111	704412	2043	EPHA4
int477:chr21:16058284..16059028	5	275842	64092,388813	SAMSN1,LOC388813
int478:chr20:21056805..21246620	251	179606	55857,22803,644524	KIZ,XRN2,NKX2-4
int479,int84:chr2:38947554..39173570	395	464940	92906,130589,79833,6432,90957,729967,100271715,6654,344387,8491	HNRNPLL,GALM,GEMIN6,SRSF7,DHX57,MORN2,ARHGEF33,SOS1,CDKL4,MAP4K3
int47:chr15:90890799..91083353	609	788913	51458,90381,374654,56964,5346,8800,145873,55897,290,10239,100526783,348110,374655,3418,10509,390637,51335,10519,342132,8826,64784,641,5045,2242,4122,55898,91433,374659,9055,26276,9899	RHCG,TICRR,KIF7,WDR93,PLIN1,PEX11A,MESP2,MESP1,ANPEP,AP3S2,C15ORF38-AP3S2,ARPIN,ZNF710,IDH2,SEMA4B,GDPGP1,NGRN,CIB1,ZNF774,IQGAP1,CRTC3,BLM,FURIN,FES,MAN2A2,UNC45A,RCCD1,HDDC3,PRC1,VPS33B,SV2B
int480:chr8:104212025..104212025	1	3780332	528,79870,8323,115908,25879,81034,9699,81501,1807,29967	ATP6V1C1,BAALC,FZD6,CTHRC1,DCAF13,SLC25A32,RIMS2,DCSTAMP,DPYS,LRP12
int481:chr17:21460712..21528062	62	61468	339263	C17ORF51
int482:chr1:38567570..38592450	35	239129	80149,64769,7802,79753,29889,284654,55143,54955,284656,149175,127687,79693,4520,3633,10946,51118,2275,5453	ZC3H12A,MEAF6,DNALI1,SNIP1,GNL2,RSPO1,CDCA8,C1ORF109,EPHA10,MANEAL,C1ORF122,YRDC,MTF1,INPP5B,SF3A3,UTP11L,FHL3,POU3F1
int484:chr11:17938556..18162945	448	677294	10944,144100,6207,5286,4925,374383,3767,6833,10083,340990,4654,3746,26297,7166,117195,113174,117196	C11ORF58,PLEKHA7,RPS13,PIK3C2A,NUCB2,NCR3LG1,KCNJ11,ABCC8,USH1C,OTOG,MYOD1,KCNC1,SERGEF,TPH1,MRGPRX3,SAAL1,MRGPRX4
int485:chr14:77496619..77532343	85	667484	64207,85457,283576,57156,58157,2954,29954,161394,283578,122945,10598,63894,145501,9517,81892,8846,283579,22938,57143	IRF2BPL,CIPC,ZDHHC22,TMEM63C,NGB,GSTZ1,POMT2,SAMD15,TMED8,NOXRED1,AHSA1,VIPAS39,ISM2,SPTLC2,SLIRP,ALKBH1,C14ORF178,SNW1,ADCK1
int487,int578:chr5:166984363..167900328	2043	600772	57451,23286,5917,79646,6586	TENM2,WWC1,RARS,PANK3,SLIT3
int489:chr15:61434751..61469322	96	705918	302,79664,6095	ANXA2,ICE2,RORA
int494:chr13:46514492..46658712	307	733051	23091,1361,3936,220416	ZC3H13,CPB2,LCP1,LRRC63
int498:chr22:36578082..36599659	126	145989	80833,80832,8542,23780,4627,25828,80020,8664,10369,11020,5816,4689,1439,4357,339669,79734,7263,164656,3560,114904,6753,5880,27128	APOL3,APOL4,APOL1,APOL2,MYH9,TXN2,FOXRED2,EIF3D,CACNG2,IFT27,PVALB,NCF4,CSF2RB,MPST,TEX33,KCTD17,TST,TMPRSS6,IL2RB,C1QTNF6,SSTR3,RAC2,CYTH4
int49:chr1:216829269..216941624	315	870746	51133,7399,2104	KCTD3,USH2A,ESRRG
int500:chr1:232159221..232159221	1	3780332	22796,10753,183,84886,79573,64801,375061,440730,149373,8443,128061,83932,149371,54583,7257,27185	COG2,CAPN9,AGT,C1ORF198,TTC13,ARV1,FAM89A,TRIM67,LOC149373,GNPAT,C1ORF131,SPRTN,EXOC8,EGLN1,TSNAX,DISC1
int504:chr19:20864227..20893225	75	673915	100129842,199777	ZNF737,ZNF626
int505:chr11:4862230..4934503	202	813347	143496,6737,119774,390036,119772,143502,390037,143501,390038,143503,55128,81285,256892,119694,119695,401665,119692,119687,81282,79324,56547,401666,119682,401667,119679,119678,390054,23538,283111,3043,100187828,3047,3048,3046,79339,390058,79345,390059,282763,390061,390064,390066,390063,50613,143630,340980,390067,117854,445372,53840,10346,85363,387748,390072,390077,390075,79473,390081,390078,390079…	OR52B4,TRIM21,OR52K2,OR52K1,OR52M1,OR52I2,OR52I1,C11ORF40,OR51D1,OR51E1,TRIM68,OR51E2,OR51F1,OR51F2,OR52R1,OR51T1,OR51S1,OR51A7,OR51G2,OR51G1,MMP26,OR51A4,OR51L1,OR51A2,OR52J3,OR52E2,OR52A5,OR52A1,OR51V1,HBB,HBD,HBG1,HBG2,HBE1,OR51B4,OR51B6,OR51B2,OR51M1,OR51B5,OR51Q1,OR51I2,OR52D1,OR51I1,UBQLN3,UBQLNL,OR52B6,OR52H1,TRIM6,TRIM6-TRIM34,TRIM34,TRIM22,TRIM5,OR56B1,OR52N4,OR52N2,OR52N5,OR52N1,OR52E4,…
int506:chr7:2482781..2544564	254	398056	8379,4521,29960,29886,8662,55501,3955,402635,23288,221927,80727,155185,2768,84433	MAD1L1,NUDT1,FTSJ2,SNX8,EIF3B,CHST12,LFNG,GRIFIN,IQCE,BRAT1,TTYH3,AMZ1,GNA12,CARD11
int508:chr4:105967687..106034949	147	681145	54790	TET2
int509:chr12:125615244..125655575	99	699161	949,7316,140707,57647,65985	SCARB1,UBC,BRI3BP,DHX37,AACS
int511,int162:chr21:41451731..41512161	182	757491	1826	DSCAM
int515,int566,int293,int133,int863,int342:chr2:239997710..240327863	975	878667	9759	HDAC4
int516:chr17:66547409..66560097	25	445385	51321,22901,9120,5573,55062,54757	AMZ2,ARSG,SLC16A6,PRKAR1A,WIPI1,FAM20A
int518:chr14:79681303..79767060	59	21121	9369	NRXN3
int51:chr1:77899667..78819970	1507	202697	81849,10026,26289,26009,23032,374986,91624,8880,11080,54810	ST6GALNAC5,PIGK,AK5,ZZZ3,USP33,FAM73A,NEXN,FUBP1,DNAJB4,GIPC2
int520:chr1:116906839..116948712	33	37042	476	ATP1A1
int521:chr2:179757052..179856304	195	591533	220988,4780,8540,150737,92104,50940,129831,114880,494513,65977,8575,51661,7273,285025,91404	HNRNPA3,NFE2L2,AGPS,TTC30B,TTC30A,PDE11A,RBM45,OSBPL6,DFNB59,PLEKHA3,PRKRA,FKBP7,TTN,CCDC141,SESTD1
int524,int169,int177,int40:chr17:72839130..73534485	1438	600487	6169,94015,64446,124602,350383,388419,55890,11314,124599,146723,10871,100131439,342510,326624,146722,9368,54868,26151,2905,2232,92736,283985,347741,124590,30850,283987,3396,23510,9121,10476,79637,30833,51155,79902,6613,51081,23163,57409,60386,2885,9772,283989,3993,57513,80022,643008,100130933,29115,9400,3691,85451,2584,3021,201294,23558,91107,201292,64978,85302,100134934,51,1018,2125,8811,353174,…	RPL38,TTYH2,DNAI2,KIF19,GPR142,BTBD17,GPRC5C,CD300A,CD300LB,C17ORF77,CD300C,CD300LD,CD300E,RAB37,CD300LF,SLC9A3R1,TMEM104,NAT9,GRIN2C,FDXR,OTOP2,FADS6,OTOP3,USH1G,CDR2L,HID1,ICT1,KCTD2,SLC16A5,ATP5H,ARMC7,NT5C,HN1,NUP85,SUMO2,MRPS7,GGA3,MIF4GD,SLC25A19,GRB2,TMEM94,TSEN54,LLGL2,CASKIN2,MYO15B,SMIM5,SMIM6,SAP30BP,RECQL5,ITGB4,UNK,GALK1,H3F3B,UNC13D,WBP2,TRIM47,TRIM65,MRPL38,FBF1,TEN1,ACOX1,CDK3,EVP…
int526:chr10:117978024..117997389	56	638836	2674,374355,119548,5406,5407,5408,143379,259217,387712,57698,11023,338567,6571,118987	GFRA1,CCDC172,PNLIPRP3,PNLIP,PNLIPRP1,PNLIPRP2,C10ORF82,HSPA12A,ENO4,SHTN1,VAX1,KCNK18,SLC18A2,PDZD8
int527:chr1:182693381..182751046	115	575664	2752,127670,353299,6041,6004,85397,80896,1660,81626,3915,3918,23057,9887,4688,23179,10092,403314,23127,116461	GLUL,TEDDM1,RGSL1,RNASEL,RGS16,RGS8,NPL,DHX9,SHCBP1L,LAMC1,LAMC2,NMNAT2,SMG7,NCF2,RGL1,ARPC5,APOBEC4,COLGALT2,TSEN15
int528:chr2:230618034..230870007	261	67523	55022,92737,9320,130888,151473	PID1,DNER,TRIP12,FBXO36,SLC16A14
int531:chr11:63295034..63353603	59	82636	85329,117245,5920,54979,11145,25923,10313,65998,144097,2011,79829,283248,1351,55611,28992,23769,10963,83706,84304,3338,7423,2286,5331,83707,56834,50801,26472,25858,2101,25824,572,283234,8986,51504	LGALS12,HRASLS5,RARRES3,HRASLS2,PLA2G16,ATL3,RTN3,C11ORF95,C11ORF84,MARK2,NAA40,RCOR2,COX8A,OTUB1,MACROD1,FLRT1,STIP1,FERMT3,NUDT22,DNAJC4,VEGFB,FKBP2,PLCB3,TRPT1,GPR137,KCNK4,PPP1R14B,TEX40,ESRRA,PRDX5,BAD,CCDC88B,RPS6KA4,TRMT112
int533,int581:chr19:56287846..56306966	67	549263	91662,91663,5582,59284,59283,59285,284415,4696,26121,441864,4849,126014,29844,79042,6203,79165,147798,79143,11025,79168,10990,10288,11026,353514,23547,3903,57348,114823,3904,94059,148170,11027,11024,10859,11006,115653,3804,3802,3805,3811,3809,3812,2204,9437,55655,199713,51206,54869,112724,54776,7138,7137,352909,6861,5794,255043,22870,84446,23640,84787,284417,147744,6158,125965,284418,3589,388564,…	NLRP12,MYADM,PRKCG,CACNG7,CACNG8,CACNG6,VSTM1,NDUFA3,PRPF31,TARM1,CNOT3,OSCAR,TFPT,TSEN34,RPS9,LENG1,TMC4,MBOAT7,LILRB3,LILRA6,LILRB5,LILRB2,LILRA3,LILRA5,LILRA4,LAIR1,TTYH1,LENG8,LAIR2,LENG9,CDC42EP5,LILRA2,LILRA1,LILRB1,LILRB4,KIR3DL3,KIR2DL3,KIR2DL1,KIR2DL4,KIR3DL1,KIR2DS4,KIR3DL2,FCAR,NCR1,NLRP2,NLRP7,GP6,EPS8L1,RDH13,PPP1R12C,TNNT1,TNNI3,DNAAF3,SYT5,PTPRH,TMEM86B,PPP6R1,BRSK1,HSPBP1,SUV420H2…
int537,int523:chr6:162933134..163273912	1308	309388	4216,56895,5071,135138	MAP3K4,AGPAT4,PARK2,PACRG
int538:chr2:168723890..168748110	112	297855	8708	B3GALT1
int54,int55:chr4:93452066..94157778	1153	260068	2895,474	GRID2,ATOH1
int540:chr20:43896605..43896605	1	3780332	57158,51526,78997,140902,3172,128486,79183,11142,10955,100,8839,60598,140730,7529,80336,6789,10953,3787,149708,128488,5266,6406,6407,6590,11317,8785,90196,6385,55861,51604,27296,10406,10816,140870,100526773,57119,90199,140832,259240,259239,164237,391253,280664,116092,11065,140686,90203,140831,7125,90204,5476,10005,63935,128497,140825,5360,63925,4318,57468,57727,958,64405,51006,63916	JPH2,OSER1,GDAP1L1,R3HDML,HNF4A,FITM2,TTPAL,PKIG,SERINC3,ADA,WISP2,KCNK15,RIMS4,YWHAB,PABPC1L,STK4,TOMM34,KCNS1,WFDC5,WFDC12,PI3,SEMG1,SEMG2,SLPI,RBPJL,MATN4,SYS1,SDC4,DBNDD2,PIGT,TP53TG5,WFDC2,SPINT3,WFDC6,EPPIN-WFDC6,EPPIN,WFDC8,WFDC10A,WFDC9,WFDC11,WFDC13,SPINT4,WFDC10B,DNTTIP1,UBE2C,WFDC3,SNX21,ZSWIM3,TNNC2,ZSWIM1,CTSA,ACOT8,PCIF1,SPATA25,NEURL2,PLTP,ZNF335,MMP9,SLC12A5,NCOA5,CD40,CDH22,SLC35…
int543:chr15:72097992..73161393	929	11091	79875,196993,10002,4649,123228,196996,5315,56965,60677,3073,338949,25820,55889,585,83440	THSD4,CT62,NR2E3,MYO9A,SENP8,GRAMD2,PKM,PARP6,CELF6,HEXA,TMEM202,ARIH1,GOLGA6B,BBS4,ADPGK
int544:chr7:37532418..37737176	396	79697	353345	GPR141
int544:chr7:37532418..37737176	396	79697	9844	ELMO1
int545:chr10:91369885..91593216	709	782024	9023,3988,3433,3437,439996,3434,24138,387700,53354,9585	CH25H,LIPA,IFIT2,IFIT3,IFIT1B,IFIT1,IFIT5,SLC16A12,PANK1,KIF20B
int546:chr19:51134298..51152949	59	610415	126123,79784,3748,7376,5424,9476,6689,4606,284361,112703,126119,554235,94030,342918,84258,50944,6320,2854,93650,84798,354,3816,3817,55554,9622,25818,5653,5650,11202,284366,5655,11012,43849,26085,27180,43847,27036,90353,945,284369,402665,147645,2109,100129083,125875,4818,3982,147646,89790,729767,27181,89858,946,7728,8778,100049587,2358,3036,2359,2357	IZUMO2,MYH14,KCNC3,NR1H2,POLD1,NAPSA,SPIB,MYBPC2,EMC10,FAM71E1,JOSD2,ASPDH,LRRC4B,C19ORF81,SYT3,SHANK1,CLEC11A,GPR32,ACPT,C19ORF48,KLK3,KLK1,KLK2,KLK15,KLK4,KLK5,KLK6,KLK7,KLK8,KLK9,KLK10,KLK11,KLK12,KLK13,SIGLEC9,KLK14,SIGLEC7,CTU1,CD33,SIGLECL1,IGLON5,VSIG10L,ETFB,LOC100129083,CLDND2,NKG7,LIM2,C19ORF84,SIGLEC10,CEACAM18,SIGLEC8,SIGLEC12,SIGLEC6,ZNF175,SIGLEC5,SIGLEC14,FPR2,HAS1,FPR3,FPR1
int547:chr13:113458612..113458612	1	3780332	10426,400165,23250,23263,2155,2159,8858,8451,55795,3916,79774,101928841,113622,55002,55208,7027,6011,496,348013,2621,643365	TUBGCP3,ATP11AUN,ATP11A,MCF2L,F7,F10,PROZ,CUL4A,PCID2,LAMP1,GRTP1,LOC101928841,ADPRHL1,TMCO3,DCUN1D2,TFDP1,GRK1,ATP4B,TMEM255B,GAS6,LINC00452
int548:chr3:134113349..134341297	495	804662	51421,80254,25847,339855	AMOTL2,CEP63,ANAPC13,KY
int550:chr1:112566033..112597493	87	693743	515,5016,128346,79084,140,5906,11218,55924,3752,643355	ATP5F1,OVGP1,C1ORF162,WDR77,ADORA3,RAP1A,DDX20,FAM212B,KCND3,LOC643355
int552:chr15:75960767..76088345	280	759084	56905,653641,653643,54939,79661,4123,25942,5780,10073,257364,55272,161753,1464,92912,26263,145957,123591,2108,64843,49855,5955,9051,10099,79834,10363	C15ORF39,GOLGA6C,GOLGA6D,COMMD4,NEIL1,MAN2C1,SIN3A,PTPN9,SNUPN,SNX33,IMP3,ODF3L1,CSPG4,UBE2Q2,FBXO22,NRG4,TMEM266,ETFA,ISL2,SCAPER,RCN2,PSTPIP1,TSPAN3,PEAK1,HMG20A
int553:chr6:100329161..100426848	166	418971	84539	MCHR2
int554:chr9:84463850..84473465	12	162088	389761,389762,389763	SPATA31D4,SPATA31D3,SPATA31D1
int555:chr7:93202612..93276888	187	810416	799	CALCR
int556:chr7:112031696..112031696	1	3780332	9732,11179,3475,286006	DOCK4,ZNF277,IFRD1,LSMEM1
int557:chr17:65060773..65276451	251	111166	8313,201134,350,5578,27091,27092,786,9931,26207,5718,25926,2186,3838,284018	AXIN2,CEP112,APOH,PRKCA,CACNG5,CACNG4,CACNG1,HELZ,PITPNC1,PSMD12,NOL11,BPTF,KPNA2,C17ORF58
int560:chr12:56455524..56462323	9	178660	121364,254783,390321,254786,283365,390323,403282,390326,341416,403284,390327,341418,121129,121130,196410,2647,5959,3679,10220,967,84324,29095,85406,4327,1606,84305,1017,5869,6821,6490,64375,6231,2065,5036,6171,84872,23344,140465,4637,6601,79035,283375,10193,93058,283373,1431,51561,10330,9924,6773,319,8914,283377,4284,27165,5939,11176,506,10728,4666,8630,5557	OR10A7,OR6C74,OR6C1,OR6C3,OR6C6,OR6C75,OR6C65,OR6C76,OR6C2,OR6C68,OR6C70,OR6C4,OR2AP1,OR10P1,METTL7B,BLOC1S1,RDH5,ITGA7,GDF11,CD63,SARNP,ORMDL2,DNAJC14,MMP19,DGKA,PYM1,CDK2,RAB5B,SUOX,PMEL,IKZF4,RPS26,ERBB3,PA2G4,RPL41,ZC3H10,ESYT1,MYL6B,MYL6,SMARCC2,NABP2,SLC39A5,RNF41,COQ10A,ANKRD52,CS,IL23A,CNPY2,PAN2,STAT2,APOF,TIMELESS,SPRYD4,MIP,GLS2,RBMS2,BAZ2A,ATP5B,PTGES3,NACA,HSD17B6,PRIM1
int561:chr8:55418245..55461786	155	574621	6101	RP1
int562:chr17:10035379..10035379	1	3780332	201140,9340,644070,5957,8522	DHRS7C,GLP2R,GSG1L2,RCVRN,GAS7
int563,int591:chr17:64251733..64534580	827	905090	8313,201134,350,5578,27091,27092,786,9931,26207,5718,25926,2186,3838,284018	AXIN2,CEP112,APOH,PRKCA,CACNG5,CACNG4,CACNG1,HELZ,PITPNC1,PSMD12,NOL11,BPTF,KPNA2,C17ORF58
int565:chr16:12585849..12611712	75	668585	9516,8303,51061,29066,26156,2935,608,92017	LITAF,SNN,TXNDC11,ZC3H7A,RSL1D1,GSPT1,TNFRSF17,SNX29
int568:chr7:114337652..114387041	135	758069	93986	FOXP2
int570,int466:chr3:155585172..156005151	819	223127	7881,6747,25976	KCNAB1,SSR3,TIPARP
int570,int466:chr3:155585172..156005151	819	223127	23007,285315,8833,9197	PLCH1,C3ORF33,GMPS,SLC33A1
int571,int445:chr7:5862648..5983553	462	480586	26100,222962,84629,80028,60,6624,54476,654231,51622,7965,5395,100310846,27102,84132,9265,5879,84792,221955,11014,392862,55146,79034,54753,100131017,7559,222967,221960	WIPI2,SLC29A4,TNRC18,FBXL18,ACTB,FSCN1,RNF216,OCM,CCZ1,AIMP2,PMS2,ANKRD61,EIF2AK1,USP42,CYTH3,RAC1,FAM220A,DAGLB,KDELR2,GRID2IP,ZDHHC4,C7ORF26,ZNF853,ZNF316,ZNF12,RSPH10B,CCZ1B
int572:chr1:64940492..64998457	82	246566	57685,55225,3716	CACHD1,RAVER2,JAK1
int573:chr9:136664170..136678449	29	474437	9442,84628,23064,389799,7270,56751,64794,9329,158067,11092,7248,8328,9328,1056,5900,26301,29989,28,6130,6835,169436,6838,6837,6834,6836,11093,57109,11094,11182,9719,389827,642968,1621,1757,7410,8019,11091	MED27,NTNG2,SETX,CFAP77,TTF1,BARHL1,DDX31,GTF3C4,AK8,C9ORF9,TSC1,GFI1B,GTF3C5,CEL,RALGDS,GBGT1,OBP2B,ABO,RPL7A,SURF2,STKLD1,SURF6,MED22,SURF1,SURF4,ADAMTS13,REXO4,CACFD1,SLC2A6,ADAMTSL2,TMEM8C,FAM163B,DBH,SARDH,VAV2,BRD3,WDR5
int575:chr11:68588176..68796746	533	952585	221,4728,10312,81622,1119,51111,53838,4041,55291,51083,9633,1374,3508,219927,116512,219931,116535	ALDH3B1,NDUFS8,TCIRG1,UNC93B1,CHKA,SUV420H1,C11ORF24,LRP5,PPP6R3,GAL,MTL5,CPT1A,IGHMBP2,MRPL21,MRGPRD,TPCN2,MRGPRF
int579:chr17:60743806..60752388	18	449115	146779,339175,11011,9902,162333	EFCAB3,METTL2A,TLK2,MRC2,MARCH10
int582,int347:chr10:97745894..97962767	408	579281	1558,142827,9124,10580,5832,953,26123,100127889,387707,54619,9849,29760,1791,93377,7093,56889,118788,84458,26148,6585,84986,10023,23401,23223,5223,84287,51013,80019,64210,26287,112817,414157,55361,118812,83742,60370,118813,6425,401647,55118,27291,84171	CYP2C8,ACSM6,PDLIM1,SORBS1,ALDH18A1,ENTPD1,TCTN3,C10ORF131,CC2D2B,CCNJ,ZNF518A,BLNK,DNTT,OPALIN,TLL2,TM9SF3,PIK3AP1,LCOR,C10ORF12,SLIT1,ARHGAP19,FRAT1,FRAT2,RRP12,PGAM1,ZDHHC16,EXOSC1,UBTD1,MMS19,ANKRD2,HOGA1,C10ORF62,PI4K2A,MORN4,MARVELD1,AVPI1,ZFYVE27,SFRP5,GOLGA7B,CRTAC1,R3HCC1L,LOXL4
int583:chr20:4008974..4008974	1	3780332	140885,5173,140901,388780,7053,343641,6628,79175,117532,10528,57593,3420,128653,100288797,64601,56265,5786,64773,2797,64949,5020,551,22888,60493,3704,9762,65992,83959,25943,8455,64096,80332,116835,6614,994,54976,55317,25876,1059,57506,80025,11237,54498,146	SIRPA,PDYN,STK35,LOC388780,TGM3,TGM6,SNRPB,ZNF343,TMC2,NOP56,EBF4,IDH3B,C20ORF141,TMEM239,VPS16,CPXM1,PTPRA,PCED1A,GNRH2,MRPS26,OXT,AVP,UBOX5,FASTKD5,ITPA,LZTS3,DDRGK1,SLC4A11,C20ORF194,ATRN,GFRA4,ADAM33,HSPA12B,SIGLEC1,CDC25B,C20ORF27,AP5S1,SPEF1,CENPB,MAVS,PANK2,RNF24,SMOX,ADRA1D
int584,int866,int491:chr17:55547695..55777985	543	911072	124540	MSI2
int585:chr6:69130024..69782518	1997	656721	577	ADGRB3
int586:chr17:71174027..71255954	264	731037	201266,6752,9382,55028,84923,642843,23580,54549	SLC39A11,SSTR2,COG1,C17ORF80,FAM104A,CPSF4L,CDC42EP4,SDK2
int589:chr17:43507403..44672951	4172	118637	80174,124808,4185,51751,10052,388389,9343,2670,146909,10882,4836,79877,79777,10614,124790,113026,752,124783,9020,201176,9842	DBF4B,CCDC43,ADAM11,HIGD1B,GJC1,CCDC103,EFTUD2,GFAP,KIF18B,C1QL1,NMT1,DCAKD,ACBD4,HEXIM1,HEXIM2,PLCD3,FMNL1,SPATA32,MAP3K14,ARHGAP27,PLEKHM1
int589:chr17:43507403..44672951	4172	118637	474170,51326,4905,7473,7484,9570,388394	LRRC37A2,ARL17A,NSF,WNT3,WNT9B,GOSR2,RPRML
int589:chr17:43507403..44672951	4172	118637	1394,162540,4137,246744,284058,105376839,100506084	CRHR1,SPPL2C,MAPT,STH,KANSL1,LRRC37A,ARL17B
int590:chr18:55310072..55325982	63	441471	2235,100505549,4677,5205	FECH,LOC100505549,NARS,ATP8B1
int592,int906:chr1:242546333..242564007	104	153793	8564,2271,23596,128025,1122,9156,441925,440738,200150	KMO,FH,OPN3,WDR64,CHML,EXO1,BECN2,MAP1LC3C,PLD5
int595:chr1:831489..872352	134	654768	148398,339451,84069,26155,9636,375790,84808,57801,401934,54991,254173,126792,8784,7293,51150,6339,388581,118424,126789,80772,83756,116983,54973,1855,54587,54998,643965,64856,81669,219293,55052,441869,83858,55210,339453,29101,142678,8510,643988,984,728661,728642,9906,65220,2782,163688,339456,85452,2563,5590,6497,199990,79906,11079,5192,9651,8764,55229,388585,127281,79258,100287898	SAMD11,KLHL17,PLEKHN1,NOC2L,ISG15,AGRN,PERM1,HES4,RNF223,C1ORF159,TTLL10,B3GALT6,TNFRSF18,TNFRSF4,SDF4,SCNN1D,FAM132A,UBE2J2,PUSL1,CPTP,TAS1R3,ACAP3,CPSF3L,DVL1,MXRA8,AURKAIP1,TMEM88B,VWA1,CCNL2,ATAD3C,MRPL20,ANKRD65,ATAD3B,ATAD3A,TMEM240,SSU72,MIB2,MMP23B,C1ORF233,CDK11B,SLC35E2B,CDK11A,SLC35E2,NADK,GNB1,CALML6,TMEM52,CFAP74,GABRD,PRKCZ,SKI,FAAP20,MORN1,RER1,PEX10,PLCH2,TNFRSF14,PANK4,HES5,FAM21…
int602,int276:chr18:45615308..45636095	66	618172	201501	ZBTB7C
int603:chr4:15395591..15499481	252	832475	114905,57545,26234,285550,683,952	C1QTNF7,CC2D2A,FBXL5,FAM200B,BST1,CD38
int604:chr10:91057358..91185257	212	394598	9023,3988,3433,3437,439996,3434,24138,387700,53354,9585	CH25H,LIPA,IFIT2,IFIT3,IFIT1B,IFIT1,IFIT5,SLC16A12,PANK1,KIF20B
int606:chr15:60608397..60670149	195	722665	302,79664,6095	ANXA2,ICE2,RORA
int609:chr5:75691606..75743907	128	737081	22987,10788,2151,2149,2150,170591,1393,55109,84327,8622,55255	SV2C,IQGAP2,F2RL2,F2R,F2RL1,S100Z,CRHBP,AGGF1,ZBED3,PDE8B,WDR41
int611,int483:chr15:90580008..90756292	560	783514	51458,90381,374654,56964,5346,8800,145873,55897,290,10239,100526783,348110,374655,3418,10509,390637,51335,10519,342132,8826,64784,641,5045,2242,4122,55898,91433,374659,9055,26276,9899	RHCG,TICRR,KIF7,WDR93,PLIN1,PEX11A,MESP2,MESP1,ANPEP,AP3S2,C15ORF38-AP3S2,ARPIN,ZNF710,IDH2,SEMA4B,GDPGP1,NGRN,CIB1,ZNF774,IQGAP1,CRTC3,BLM,FURIN,FES,MAN2A2,UNC45A,RCCD1,HDDC3,PRC1,VPS33B,SV2B
int613:chr2:238857006..239037273	593	726476	1293,79083,51052,64284,9208,375316,10267,140739,51540,339768,377007,151176,80895,55502,8864,26146,51665	COL6A3,MLPH,PRLH,RAB17,LRRFIP1,RBM44,RAMP1,UBE2F,SCLY,ESPNL,KLHL30,FAM132B,ILKAP,HES6,PER2,TRAF3IP1,ASB1
int614,int260:chr1:158981187..159074762	224	810235	391112,128368,128366,128367,6708,81448,128371,391114,128372,81442,4332,149628,3428,9447,57863,2532,2205,441911,26476	OR6Y1,OR10Z1,OR6P1,OR10X1,SPTA1,OR6K2,OR6K6,OR6K3,OR6N1,OR6N2,MNDA,PYHIN1,IFI16,AIM2,CADM3,ACKR1,FCER1A,OR10J3,OR10J1
int615:chr7:63757160..64210052	1432	333003	340252,51427,7697,10793	ZNF680,ZNF107,ZNF138,ZNF273
int615:chr7:63757160..64210052	1432	333003	730291,168417,728927	ZNF735,ZNF679,ZNF736
int616:chr1:20284874..20326080	122	718413	23352,51154,23065,54896,22977,8574,832,440574,100532736,4681,3362,255104,54546,23252,30814,5320,5322,64600,26279,127733,391013,127731	UBR4,MRTO4,EMC1,PQLC2,AKR7A3,AKR7A2,CAPZB,MINOS1,MINOS1-NBL1,NBL1,HTR6,TMCO4,RNF186,OTUD3,PLA2G2E,PLA2G2A,PLA2G5,PLA2G2F,PLA2G2D,UBXN10,PLA2G2C,VWA5B1
int618,int77:chr2:98998983..100146146	1760	109545	57730,1329,10120,7535,23505,200403,1261,3631,25972,493753,11320,343990,80705,150590,51601,51263,129531,254773,129530,9669,10190,51455,3899	ANKRD36B,COX5B,ACTR1B,ZAP70,TMEM131,VWA3B,CNGA3,INPP4A,UNC50,COA5,MGAT4A,KIAA1211L,TSGA10,C2ORF15,LIPT1,MRPL30,MITD1,LYG2,LYG1,EIF5B,TXNDC9,REV1,AFF3
int619:chr11:98911438..98911604	4	60445	53942	CNTN5
int621,int453:chr2:206050355..206495505	1017	828292	117583,8828	PARD3B,NRP2
int622,int181:chr7:70071979..70257129	541	889040	26053	AUTS2
int625,int729:chr8:109067078..109588327	1439	85357	9694	EMC2
int625,int729:chr8:109067078..109588327	1439	85357	340419	RSPO2
int625,int729:chr8:109067078..109588327	1439	85357	3646	EIF3E
int626,int826:chr8:72179780..72239230	178	759243	2138	EYA1
int630,int768:chr13:92170670..92265763	236	839376	2262	GPC5
int631,int222,int501:chr2:62905539..64334456	1879	34122	51057,4190	WDPCP,MDH1
int631,int222,int501:chr2:62905539..64334456	1879	34122	23301,5013	EHBP1,OTX1
int631,int222,int501:chr2:62905539..64334456	1879	34122	7360,51542,57162	UGP2,VPS54,PELI1
int633:chr20:24001032..24051650	108	631833	92086	GGTLC1
int634:chr19:43885987..43955545	239	21942	5669,5675,5676,5680,5670,5673,5672,5678,57126,83639	PSG1,PSG6,PSG7,PSG11,PSG2,PSG5,PSG4,PSG9,CD177,TEX101
int634:chr19:43885987..43955545	239	21942	27076,653583,284346,23474,390940,7515,79177,100170229,126298,126299,199731,5329,56269,56006,3783,284349,284348,342908,7638,7596,7711,7773,7673,7766,342909,7767,7768,10780,7769,7770,353355,9310,7771,26974,7772,7733,125931,147710,5817,56971,388551,602,23624,4059,5819,10452,348,341,346,344,1209,5971,11129,79760,284352,162979,388552,284353,79090,57787,90332,147700,1158,2068,10849,10848,2067,2354,1476…	LYPD3,PHLDB3,ZNF575,ETHE1,PINLYP,XRCC1,ZNF576,SRRM5,IRGQ,ZNF428,CADM4,PLAUR,IRGC,SMG9,KCNN4,ZNF283,LYPD5,ZNF404,ZNF221,ZNF45,ZNF155,ZNF230,ZNF222,ZNF223,ZNF284,ZNF224,ZNF225,ZNF234,ZNF226,ZNF227,ZNF233,ZNF235,ZNF112,ZNF285,ZNF229,ZNF180,CEACAM20,IGSF23,PVR,CEACAM19,CEACAM16,BCL3,CBLC,BCAM,PVRL2,TOMM40,APOE,APOC1,APOC4,APOC2,CLPTM1,RELB,CLASRP,GEMIN7,PPP1R37,ZNF296,BLOC1S3,NKPD1,TRAPPC6A,MARK4,EXO…
int635:chr8:24282721..24410740	317	870912	10863,27299,8756	ADAM28,ADAMDEC1,ADAM7
int637:chr11:2956783..3091788	416	818223	3481,723961,3630,7054,10077,430,29125,975,10078,3784,29850,5002,1028,5003,7262,4676,833,114879,386746,116534	IGF2,INS-IGF2,INS,TH,TSPAN32,ASCL2,C11ORF21,CD81,TSSC4,KCNQ1,TRPM5,SLC22A18,CDKN1C,SLC22A18AS,PHLDA2,NAP1L4,CARS,OSBPL5,MRGPRG,MRGPRE
int638:chr5:77992284..78016049	60	645209	8546,9522,10184	AP3B1,SCAMP1,LHFPL2
int63:chr4:152105746..152609700	1083	365425	166614,987,10586,6189,152503,345062	DCLK2,LRBA,MAB21L2,RPS3A,SH3D19,PRSS48
int63:chr4:152105746..152609700	1083	365425	729830,5188	FAM160A1,GATB
int64,int298:chr12:80453341..80731040	424	284101	283310,374462,4618,4617	OTOGL,PTPRQ,MYF6,MYF5
int640,int663:chr17:28733862..29738071	1540	50401	4763,4974,2124,2123,84440	NF1,OMG,EVI2B,EVI2A,RAB11FIP4
int640,int663:chr17:28733862..29738071	1540	50401	79915,51379,55803,79736,84282	ATAD5,CRLF3,ADAP2,TEFM,RNF135
int640,int663:chr17:28733862..29738071	1540	50401	27346,7126,147007,23098,90410,26073,645832,7448,113235,9058,8456,9094,94005,230,10615,124923,6830,9703,6388,6147,284086,9618,147011,83871,100861437,116238,55731,26284,2319,147015,57649,124925,51268,399687,9220,1411,57532,57551,90313,124930,116236,28964,84940,85464,374786,84081,6532,642,388364,1362,9527,26083	TMEM97,TNFAIP1,TMEM199,SARM1,IFT20,POLDIP2,SEBOX,VTN,SLC46A1,SLC13A2,FOXN1,UNC119,PIGS,ALDOC,SPAG5,SGK494,SUPT6H,KIAA0100,SDF2,RPL23A,NEK8,TRAF4,PROCA1,RAB34,NARR,TLCD1,FAM222B,ERAL1,FLOT2,DHRS13,PHF12,SEZ6,PIPOX,MYO18A,TIAF1,CRYBA1,NUFIP2,TAOK1,TP53I13,ANKRD13B,ABHD15,GIT1,CORO6,SSH2,EFCAB5,NSRP1,SLC6A4,BLMH,TMIGD1,CPD,GOSR1,TBC1D29
int641:chr18:32622168..32926744	491	72473	84307,100101467,7572,252884	ZNF397,ZSCAN30,ZNF24,ZNF396
int641:chr18:32622168..32926744	491	72473	1837,10982	DTNA,MAPRE2
int642:chr22:36216155..36440240	236	75329	80830,4151,80831,23543	APOL6,MB,APOL5,RBFOX2
int644:chr8:26736989..26897003	742	170276	148	ADRA1A
int646:chr7:147754924..147812966	98	398821	26047	CNTNAP2
int647:chr6:7257272..7264849	30	433828	6239,6745,285782,83732	RREB1,SSR1,CAGE1,RIOK1
int648:chr1:164765566..164943923	397	817287	5087	PBX1
int651:chr18:43617872..43716475	259	864549	8170,6563,284266,57724,9050,115106,498,147339,494470,125336,29906,9063,83473,100506888,728929,162699,51224,84064,51124,652991	SLC14A2,SLC14A1,SIGLEC15,EPG5,PSTPIP2,HAUS1,ATP5A1,C18ORF25,RNF165,LOXHD1,ST8SIA5,PIAS2,KATNAL2,TCEB3CL2,TCEB3CL,TCEB3C,TCEB3B,HDHD2,IER3IP1,SKOR2
int652,int424,int424,int85,int458:chr17:48396110..48647011	571	877099	3211,3212,3213,3214,3215,3216,3217,3218,3219,360205,84366,10481,284076,10241,516,65264,11267,10642,2695,124872,51225,2793,162466,22834,5245,4804,11248,8405,10237,81558,11143,729220,255061,1748,1747,3675,5164,201191,6442,84687,1277,162461,64132,146956,51264,80221,55379,55316,84073,1101,55040,64847,8913,8714,51747,91369,124857,10140	HOXB1,HOXB2,HOXB3,HOXB4,HOXB5,HOXB6,HOXB7,HOXB8,HOXB9,PRAC2,PRAC1,HOXB13,TTLL6,CALCOCO2,ATP5G1,UBE2Z,SNF8,IGF2BP1,GIP,B4GALNT2,ABI3,GNGT2,PHOSPHO1,ZNF652,PHB,NGFR,NXPH3,SPOP,SLC35B1,FAM117A,KAT7,FLJ45513,TAC4,DLX4,DLX3,ITGA3,PDK2,SAMD14,SGCA,PPP1R9B,COL1A1,TMEM92,XYLT2,EME1,MRPL27,ACSF2,LRRC59,RSAD1,MYCBPAP,CHAD,EPN3,SPATA20,CACNA1G,ABCC3,LUC7L3,ANKRD40,WFIKKN2,TOB1
int654:chr3:172419276..172566275	287	619338	57552,1894	NCEH1,ECT2
int655:chr10:16557186..16617359	175	773710	9317,389941,6251,8029,1787,7431	PTER,C1QL3,RSU1,CUBN,TRDMT1,VIM
int656:chr16:5143791..5200693	287	144239	79622,4350,51728,64285,8131,3050,3042,3040,3039,3049,83986,55692,398,64714,8786,8312,4833,26063,10573,58986,9727,6650,146325,283948,9091,57799,117166,84331,197335,89941,9028,10273,84326,79006,65990,84264,339123,84219,146330,10232,124093,64428,63922,388199,113000,51764,64788,30812,6755,390664,8912,7177,23430,25823,64499,7329,8938,84572,115939,64718,283951,645811,9894,1186,79652,390667,9742,57585,9…	SNRNP25,MPG,POLR3K,RHBDF1,NPRL3,HBZ,HBM,HBA2,HBA1,HBQ1,FAM234A,LUC7L,ARHGDIG,PDIA2,RGS11,AXIN1,NME4,DECR2,MRPL28,TMEM8A,RAB11FIP3,CAPN15,PRR35,NHLRC4,PIGQ,RAB40C,WFIKKN1,FAM195A,WDR90,RHOT2,RHBDL1,STUB1,C16ORF13,METRN,FAM173A,HAGHL,JMJD8,WDR24,FBXL16,MSLN,CCDC78,NARFL,CHTF18,PRR25,RPUSD1,GNG13,LMF1,SOX8,SSTR5,C1QTNF8,CACNA1H,TPSAB1,TPSD1,TPSG1,TPSB2,UBE2I,BAIAP3,GNPTG,TSR3,UNKL,C16ORF91,CCDC154,T…
int657:chr6:44852734..45396544	1121	651886	8464,860	SUPT3H,RUNX2
int658:chr2:208925719..208957750	96	683576	1385,151194,151195,7855,389072	CREB1,METTL21A,CCNYL1,FZD5,PLEKHM3
int660:chr16:24099496..24106227	16	488195	57478,6340,6338,91949,23062,56061,124454,4706,84516,79728,5347,10595,63928,5579,10368	USP31,SCNN1G,SCNN1B,COG7,GGA2,UBFD1,EARS2,NDUFAB1,DCTN5,PALB2,PLK1,ERN2,CHP2,PRKCB,CACNG3
int661:chr12:31799621..31801645	8	410120	58516,160518,254013,196394,440093	FAM60A,DENND5B,METTL20,AMN1,H3F3C
int662:chr4:188991315..188992049	7	158692	339976,205860	TRIML1,TRIML2
int664:chr9:33531481..33531481	1	3780332	54840,3301,55234,2683,27290,51510,4799,573,364,360,65083,441459	APTX,DNAJA1,SMU1,B4GALT1,SPINK4,CHMP5,NFX1,BAG1,AQP7,AQP3,NOL6,ANKRD18B
int665,int231,int157:chr2:85339839..85394572	197	574974	8802,1768,129293,9168,56888,83439,84173,10618,54884,284948,822,4144,8673,10791,2677,51255,10713,129303,388969,10578,6439,84913	SUCLG1,DNAH6,TRABD2A,TMSB10,KCMF1,TCF7L1,ELMOD3,TGOLN2,RETSAT,SH2D6,CAPG,MAT2A,VAMP8,VAMP5,GGCX,RNF181,USP39,TMEM150A,C2ORF68,GNLY,SFTPB,ATOH8
int668:chr6:142648056..142934867	347	119212	4829,51534,57211	NMBR,VTA1,ADGRG6
int66:chr5:133294384..133416974	281	801958	56951,7416,6932,6500,5515,51265,7320,91368,23338,10802,51128,819,9879,134553,79770,84105,347732,5307	C5ORF15,VDAC1,TCF7,SKP1,PPP2CA,CDKL3,UBE2B,CDKN2AIPNL,JADE2,SEC24A,SAR1B,CAMLG,DDX46,C5ORF24,TXNDC15,PCBD2,CATSPER3,PITX1
int670:chr9:84253427..84274151	61	643631	7088	TLE1
int671,int31,int450:chr3:69832851..70217984	734	575657	4286	MITF
int673:chr16:87858245..87879163	131	113876	100506581,79791,81631,23174,57338,54758,8140,763,54971	C16ORF95,FBXO31,MAP1LC3B,ZCCHC14,JPH3,KLHDC4,SLC7A5,CA5A,BANP
int674:chr3:171852737..171857014	8	315214	64778	FNDC3B
int675:chr5:125882825..125882825	1	3780332	501,51808,389320	ALDH7A1,PHAX,TEX43
int676:chr11:35399975..35403124	7	363988	960,6506,25891,24147,54765	CD44,SLC1A2,PAMR1,FJX1,TRIM44
int681:chr9:129954016..130076801	107	44167	23099,403341,9649,23452,84253,29988,7633,90678,6136,64855,6812,286207,158248,138428,27433,1025,10044,2356,2022,203,30815,27090,138429,8818,399665,114789,203245,3934,79095,80142,1759,25792,375757,2801,51117,10999,26995,81605,51148,4957,2733,6709,6418,89891,29941,84885,10444,54662,2021,51490,56262,883,254295,23511,22845,84895,56904,57171,5524,1384,389792	ZBTB43,ZBTB34,RALGPS1,ANGPTL2,GARNL3,SLC2A8,ZNF79,LRSAM1,RPL12,FAM129B,STXBP1,CFAP157,TTC16,PTRH1,TOR2A,CDK9,SH2D3C,FPGS,ENG,AK1,ST6GALNAC6,ST6GALNAC4,PIP5KL1,DPM2,FAM102A,SLC25A25,NAIF1,LCN2,C9ORF16,PTGES2,DNM1,CIZ1,SWI5,GOLGA2,COQ4,SLC27A4,TRUB2,URM1,CERCAM,ODF2,GLE1,SPTAN1,SET,WDR34,PKN3,ZDHHC12,ZER1,TBC1D13,ENDOG,C9ORF114,LRRC8A,CCBL1,PHYHD1,NUP188,DOLK,FAM73B,SH3GLB2,DOLPP1,PPP2R4,CRAT,IER5L
int683,int659:chr12:15368644..15669413	459	277980	85004,5800,2059,11171,51071	RERG,PTPRO,EPS8,STRAP,DERA
int687,int103:chr2:119223974..119631981	915	814385	2019,8685	EN1,MARCO
int688:chr22:36910391..36941780	117	513139	80833,80832,8542,23780,4627,25828,80020,8664,10369,11020,5816,4689,1439,4357,339669,79734,7263,164656,3560,114904,6753,5880,27128	APOL3,APOL4,APOL1,APOL2,MYH9,TXN2,FOXRED2,EIF3D,CACNG2,IFT27,PVALB,NCF4,CSF2RB,MPST,TEX33,KCTD17,TST,TMPRSS6,IL2RB,C1QTNF6,SSTR3,RAC2,CYTH4
int689:chr3:35676532..35775455	176	472385	10777	ARPP21
int690:chr22:38387223..38387224	2	60443	114794,4242,29775,11135,26088,3957,23616,57026,3956,79159,11078,3005,23464,8484,51386,129138,85377,5435,84645,6663,9463,23539,80115,8398,23764,25829,1454	ELFN2,MFNG,CARD10,CDC42EP1,GGA1,LGALS2,SH3BP1,PDXP,LGALS1,NOL12,TRIOBP,H1F0,GCAT,GALR3,EIF3L,ANKRD54,MICALL1,POLR2F,C22ORF23,SOX10,PICK1,SLC16A8,BAIAP2L2,PLA2G6,MAFF,TMEM184B,CSNK1E
int691,int59:chr10:68988231..69896336	1649	277068	56521,23411,26091,84665,220202,3189,64081,55680,1763,8034,80312,55749,219736,79009,9188	DNAJC12,SIRT1,HERC4,MYPN,ATOH7,HNRNPH3,PBLD,RUFY2,DNA2,SLC25A16,TET1,CCAR1,STOX1,DDX50,DDX21
int691,int59:chr10:68988231..69896336	1649	277068	29119,347731	CTNNA3,LRRTM3
int692,int698:chr1:198052735..198451136	1076	950165	140609	NEK7
int693:chr5:139191665..139207494	24	279574	84249,9542,5813,492311,84418,5201,83697,1839,54882,404734,8637,113829,10011,10307,55374,3550,54853,929,23438,4695,153527,373863,3035,56147,56146,56145,56144,56143,56142,56141,56140,9752,56139,56138,56137,56136,56135,56134,29930,56133,56132,56131,26167,56130,56129,56128,57717,56127,56126,56125,56124,56123,56122,56121,56114,56113,56112,56104,83884,56111,56103,56110,6879,56102,56109,56108,8641,9708,…	PSD2,NRG2,PURA,IGIP,CYSTM1,PFDN1,SLC4A9,HBEGF,ANKHD1,ANKHD1-EIF4EBP3,EIF4EBP3,SLC35A4,SRA1,APBB3,TMCO6,IK,WDR55,CD14,HARS2,NDUFA2,ZMAT2,DND1,HARS,PCDHA1,PCDHA2,PCDHA3,PCDHA4,PCDHA5,PCDHA6,PCDHA7,PCDHA8,PCDHA9,PCDHA10,PCDHA11,PCDHA12,PCDHA13,PCDHAC1,PCDHAC2,PCDHB1,PCDHB2,PCDHB3,PCDHB4,PCDHB5,PCDHB6,PCDHB7,PCDHB8,PCDHB16,PCDHB9,PCDHB10,PCDHB11,PCDHB12,PCDHB13,PCDHB14,PCDHB15,PCDHGA1,PCDHGA2,PCDHGA3…
int695,int832:chr3:55062106..55097273	132	506610	55799,57408	CACNA2D3,LRTM1
int696,int384:chr3:133162914..133194456	88	693804	66000,8419	TMEM108,BFSP2
int697:chr7:16408071..16480989	189	815313	729920,25928,100506049,28969,57037,27075,10551,155465	ISPD,SOSTDC1,LRRC72,BZW2,ANKMY2,TSPAN13,AGR2,AGR3
int699:chr16:8968067..9079252	254	783857	283953,79091,18,5373,25880,23589,7874,29035	TMEM114,METTL22,ABAT,PMM2,TMEM186,CARHSP1,USP7,C16ORF72
int69:chr7:31826095..31890104	132	618383	5137	PDE1C
int700:chr3:190211244..190222954	22	407755	9076,10686,131920,3556	CLDN1,CLDN16,TMEM207,IL1RAP
int701:chr2:173620465..173716172	180	536137	11069,51776,83879	RAPGEF4,ZAK,CDCA7
int702:chr15:32995468..33062361	223	678173	653125,728047,643699,9824,6447,26585,342184,6263,57099,1133,161779,56851,79768,51234,9990,256646,55505,254531,23015	GOLGA8K,GOLGA8O,GOLGA8N,ARHGAP11A,SCG5,GREM1,FMN1,RYR3,AVEN,CHRM5,PGBD4,EMC7,KATNBL1,EMC4,SLC12A6,NUTM1,NOP10,LPCAT4,GOLGA8A
int706:chr7:101096477..101102990	53	75566	8295,222865,57154,402569,10552,10095,8896,10898,11333,26024,100526740,285989,23660,9551,84124,79027,221786,100289187,221785,1577,100861540,1551,1576,64816,81392,89122,349149,7586,563,7589,10980,9179,7551,245812,255374,4176,389541,6878,10734,55262,79690,79037,221914,352954,441272,29990,29992,56257,55063,222950,221908,402573,81628,3268,26261,5118,64598,100316904,4034,7036,2783,51412,10248,2056,6459…	TRRAP,TMEM130,SMURF1,KPNA7,ARPC1A,ARPC1B,BUD31,CPSF4,PDAP1,PTCD1,ATP5J2-PTCD1,ZNF789,ZKSCAN5,ATP5J2,ZNF394,ZNF655,FAM200A,GS1-259H13.2,ZSCAN25,CYP3A5,CYP3A7-CYP3A51P,CYP3A7,CYP3A4,CYP3A43,OR2AE1,TRIM4,GJC3,ZKSCAN1,AZGP1,ZSCAN21,COPS6,AP4M1,ZNF3,CNPY4,MBLAC1,MCM7,LAMTOR4,TAF6,STAG3,C7ORF43,GAL3ST4,PVRIG,GPC2,GATS,SPDYE3,PILRB,PILRA,MEPCE,ZCWPW1,NYAP1,PPP1R35,C7ORF61,TSC22D4,AGFG2,FBXO24,PCOLCE,MOS…
int708:chr12:108320634..108475893	462	863487	9671,1240	WSCD2,CMKLR1
int709:chr1:212882450..213004927	377	811690	55509,25936,128387,28982,149643,79805,90806,26750	BATF3,NSL1,TATDN3,FLVCR1,SPATA45,VASH2,ANGEL2,RPS6KC1
int710,int81:chr15:54355939..54400068	161	547541	440279	UNC13C
int711:chr7:18065193..18092793	71	666778	23161,221823,9734	SNX13,PRPS1L1,HDAC9
int713:chr13:67306783..67472713	322	618377	5101	PCDH9
int714:chr11:3564942..3654676	487	90516	417,116969,57053,4928,27315,6786,391,6240	ART1,ART5,CHRNA10,NUP98,PGAP2,STIM1,RHOG,RRM1
int717:chr11:114302800..114450708	360	86056	120400,54827,120406	NXPE1,NXPE4,NXPE2
int717:chr11:114302800..114450708	360	86056	80975,644672,9183,57646,9177,3359,7704,4837,10179,25996,54494	TMPRSS5,CLDN25,ZW10,USP28,HTR3B,HTR3A,ZBTB16,NNMT,RBM7,REXO2,C11ORF71
int719:chr6:63808931..64539397	1178	147214	51557	LGSN
int719:chr6:63808931..64539397	1178	147214	7803,23469,346007,441155	PTP4A1,PHF3,EYS,LOC441155
int720:chr10:54072560..54116232	88	565325	29974,5592,23283,22943	A1CF,PRKG1,CSTF2T,DKK1
int722:chr3:1114303..1114366	7	644	27255	CNTN6
int724:chr17:1627704..1657899	96	650317	7531,1398,4641,51763,5306,124935,8578,83547,10594,124997,5345,727910,5176,114826,6117,146760,1801,124641,3090,23293,63826,9905,55720,4335,79066,5048,23277,23108,8386,4991,8390,26189,8383	YWHAE,CRK,MYO1C,INPP5K,PITPNA,SLC43A2,SCARF1,RILP,PRPF8,WDR81,SERPINF2,TLCD2,SERPINF1,SMYD4,RPA1,RTN4RL1,DPH1,OVCA2,HIC1,SMG6,SRR,SGSM2,TSR1,MNT,METTL16,PAFAH1B1,CLUH,RAP1GAP2,OR1D5,OR1D2,OR1G1,OR1A2,OR1A1
int727:chr19:55064008..55166829	409	420306	91662,91663,5582,59284,59283,59285,284415,4696,26121,441864,4849,126014,29844,79042,6203,79165,147798,79143,11025,79168,10990,10288,11026,353514,23547,3903,57348,114823,3904,94059,148170,11027,11024,10859,11006,115653,3804,3802,3805,3811,3809,3812,2204,9437,55655,199713,51206,54869,112724,54776,7138,7137,352909,6861,5794,255043,22870,84446,23640,84787,284417,147744,6158,125965,284418,3589,388564,…	NLRP12,MYADM,PRKCG,CACNG7,CACNG8,CACNG6,VSTM1,NDUFA3,PRPF31,TARM1,CNOT3,OSCAR,TFPT,TSEN34,RPS9,LENG1,TMC4,MBOAT7,LILRB3,LILRA6,LILRB5,LILRB2,LILRA3,LILRA5,LILRA4,LAIR1,TTYH1,LENG8,LAIR2,LENG9,CDC42EP5,LILRA2,LILRA1,LILRB1,LILRB4,KIR3DL3,KIR2DL3,KIR2DL1,KIR2DL4,KIR3DL1,KIR2DS4,KIR3DL2,FCAR,NCR1,NLRP2,NLRP7,GP6,EPS8L1,RDH13,PPP1R12C,TNNT1,TNNI3,DNAAF3,SYT5,PTPRH,TMEM86B,PPP6R1,BRSK1,HSPBP1,SUV420H2…
int728:chr5:796047..824025	78	679527	79844,9319,65980,85409,10723,340024,348932,7015,81037,6531,79888	ZDHHC11,TRIP13,BRD9,NKD2,SLC12A7,SLC6A19,SLC6A18,TERT,CLPTM1L,SLC6A3,LPCAT1
int730:chr20:37020978..37240766	222	5972	56259,128434,9675,58490,7052,85449,671,3929	CTNNBL1,VSTM2L,TTI1,RPRD1B,TGM2,KIAA1755,BPI,LBP
int730:chr20:37020978..37240766	222	5972	57148,149685,343578,140679,79913,26051,81610,60625	RALGAPB,ADIG,ARHGAP40,SLC32A1,ACTR5,PPP1R16B,FAM83D,DHX35
int731:chr3:141660166..141879926	743	658191	9616,131890,483,7029,256356,54464,545,5357,7220,26577,23350,344838,9435	RNF7,GRK7,ATP1B3,TFDP2,GK5,XRN1,ATR,PLS1,TRPC1,PCOLCE2,U2SURP,PAQR9,CHST2
int735:chr11:122751060..122751060	1	3780332	84959,56253,79864,390259,3312,79827	UBASH3B,CRTAM,C11ORF63,BSX,HSPA8,CLMP
int738:chr17:2400876..2410593	25	555058	7531,1398,4641,51763,5306,124935,8578,83547,10594,124997,5345,727910,5176,114826,6117,146760,1801,124641,3090,23293,63826,9905,55720,4335,79066,5048,23277,23108,8386,4991,8390,26189,8383	YWHAE,CRK,MYO1C,INPP5K,PITPNA,SLC43A2,SCARF1,RILP,PRPF8,WDR81,SERPINF2,TLCD2,SERPINF1,SMYD4,RPA1,RTN4RL1,DPH1,OVCA2,HIC1,SMG6,SRR,SGSM2,TSR1,MNT,METTL16,PAFAH1B1,CLUH,RAP1GAP2,OR1D5,OR1D2,OR1G1,OR1A2,OR1A1
int739:chr8:128675771..128679252	9	437621	4609	MYC
int73:chr19:7636751..7731619	271	845316	23370,374877,140467,57192,92960,10908,57662,100131801,6813,56729,56949,199675,126003,126006,2208,10332,339390,30835,115704,80131,5609,100507588,80164,6618,404217,10469,1994,6370,84467,79603,6234,51293,4701,51129,256949,9230,51257,4670,84106,84330,4542,81794	ARHGEF18,C19ORF45,ZNF358,MCOLN1,PEX11G,PNPLA6,CAMSAP3,PET100,STXBP2,RETN,XAB2,MCEMP1,TRAPPC5,PCP2,FCER2,CLEC4M,CLEC4G,CD209,EVI5L,LRRC8E,MAP2K7,TGFBR3L,PRR36,SNAPC2,CTXN1,TIMM44,ELAVL1,CCL25,FBN3,CERS4,RPS28,CD320,NDUFA7,ANGPTL4,KANK3,RAB11B,MARCH2,HNRNPM,PRAM1,ZNF414,MYO1F,ADAMTS10
int740,int957:chr12:130869054..130906479	131	585917	9271,23504	PIWIL1,RIMBP2
int743:chr8:27475767..27564846	287	36089	81551,2185,23087,2053,1135,51435,1191	STMN4,PTK2B,TRIM35,EPHX2,CHRNA2,SCARA3,CLU
int743:chr8:27475767..27564846	287	36089	157570,55246,55872,286133,389643,55140	ESCO2,CCDC25,PBK,SCARA5,NUGGC,ELP3
int746:chr5:35054522..35078728	49	515281	26064,153657,55299,134218,5810,64902,5618	RAI14,TTC23L,BRIX1,DNAJC21,RAD1,AGXT2,PRLR
int747,int894:chr8:32192790..32816348	1586	832139	3084	NRG1
int748:chr9:121959985..122001714	104	711874	1620	BRINP1
int74:chr5:178696394..178698324	9	364584	5626,23138,64777,55651,3182,85007,91522,57396,6940,117608,80108,285676,345462,2916,30832,9509	PROP1,N4BP3,RMND5B,NHP2,HNRNPAB,PHYKPL,COL23A1,CLK4,ZNF354A,ZNF354B,ZFP2,ZNF454,ZNF879,GRM6,ZNF354C,ADAMTS2
int751:chr2:30053857..30053857	1	3780332	5500,245711,23160,55006,165186,79745,388939,238	PPP1CB,SPDYA,WDR43,TRMT61B,FAM179A,CLIP4,C2ORF71,ALK
int752:chr2:102860321..103080103	801	503874	7850,3554,8808,9173,8809,8807,389015,6549,130827,84804	IL1R2,IL1R1,IL1RL2,IL1RL1,IL18R1,IL18RAP,SLC9A4,SLC9A2,TMEM182,MFSD9
int753:chr8:38622060..38622060	1	3780332	6867,59339,203100,8754,83877,203102	TACC1,PLEKHA2,HTRA4,ADAM9,TM2D2,ADAM32
int756:chr3:20191506..20373412	619	665396	151651,5868,151649,8850,151648	EFHB,RAB5A,PP2D1,KAT2B,SGOL1
int762:chr1:116407240..116651984	432	478345	81839,845,4808,55356,126868	VANGL1,CASQ2,NHLH2,SLC22A15,MAB21L3
int763:chr10:29093958..29112015	99	190435	283080	C10ORF126
int765,int18:chr3:179812133..180292831	618	40748	64393,5290,27094,51193,55669,59345,86,4711,57129,8975,51555	ZMAT3,PIK3CA,KCNMB3,ZNF639,MFN1,GNB4,ACTL6A,NDUFB5,MRPL47,USP13,PEX5L
int765,int18:chr3:179812133..180292831	618	40748	151613,339829	TTC14,CCDC39
int766:chr12:69269375..69289749	54	641006	5908,57122,55508,4193,1368	RAP1B,NUP107,SLC35E3,MDM2,CPM
int770:chr3:3022997..3023000	2	21497	152330,3568,51095,51185	CNTN4,IL5RA,TRNT1,CRBN
int771:chr1:156403681..156474119	88	60514	23632,81611,79630,148523,54460,51107,9129,23248,80222,1893,54507,4170,2029,55204,84072,1520,1513,405,9869,8416,58497,29956,149428,55793,54964,10962,126626,56882,79626,100534012,79005,10500,8394,388695,29765,6944,5710,57592,5298,5993,5692,8991,23126,57530,7286,81609,284485,11189,51686,65005,11022,339398,6097,100191040,284486,117145,6281,6282,126637,7062,126638,388697,2312,388698,49860,254910,54544…	CA14,ANP32E,C1ORF54,CIART,MRPS21,APH1A,PRPF3,RPRD2,TARS2,ECM1,ADAMTSL4,MCL1,ENSA,GOLPH3L,HORMAD1,CTSS,CTSK,ARNT,SETDB1,ANXA9,PRUNE,CERS2,BNIPL,FAM63A,C1ORF56,MLLT11,GABPB2,CDC42SE1,TNFAIP8L2,TNFAIP8L2-SCNM1,SCNM1,SEMA6C,PIP5K1A,LYSMD1,TMOD4,VPS72,PSMD4,ZNF687,PI4KB,RFX5,PSMB4,SELENBP1,POGZ,CGN,TUFT1,SNX27,RIIAD1,CELF3,OAZ3,MRPL9,TDRKH,LINGO4,RORC,C2CD4D,THEM5,THEM4,S100A10,S100A11,TCHHL1,TCHH,RPT…
int773:chr11:131582093..131606071	61	648488	50863	NTM
int774:chr8:49888974..50369079	1242	912641	6591,492307	SNAI2,C8ORF22
int776:chr19:6312290..6323207	53	285120	6294,9667,374875,25873,257062,125988,9361,4902,163154,56931,2528,2525,400673,828,2527,126328,8498,5990,81616,4298,125981,8192,84266,5623,2962,8570,92359,284427,79085,79958,8744,10382,970,8740,718,9322,7409,56927,10045,2015	SAFB,SAFB2,HSD11B1L,RPL36,CATSPERD,C19ORF70,LONP1,NRTN,PRR22,DUS3L,FUT6,FUT3,VMAC,CAPS,FUT5,NDUFA11,RANBP3,RFX2,ACSBG2,MLLT1,ACER1,CLPP,ALKBH7,PSPN,GTF2F1,KHSRP,CRB3,SLC25A41,SLC25A23,DENND1C,TNFSF9,TUBB4A,CD70,TNFSF14,C3,TRIP10,VAV1,GPR108,SH2D3A,ADGRE1
int777:chr3:184517015..184517041	3	11673	64110,23355,285382,1962,9175,90407,200879,59343,10644,6434	MAGEF1,VPS8,C3ORF70,EHHADH,MAP3K13,TMEM41A,LIPH,SENP2,IGF2BP2,TRA2B
int779:chr12:50271497..50281414	30	568769	79657,8909,55652,10411,51564,7421,79022,1280,29843,5213,387856,140461,121275,341567,121274,23519,121273,341568,3906,54934,904,784,112,9416,85478,27289,51303,7471,377,7480,23109,5571,8085,121268,50846,55716,10376,84790,7846,5630,10024,79962,65244,338761,23416,10445,25766,84070,91010,7009,57701,144233,23017,359,362,363,29127,41,6602,2819,84987,91012,51474,121006,113251,57609,466,283471,25840,613227…	RPAP3,ENDOU,SLC48A1,RAPGEF3,HDAC7,VDR,TMEM106C,COL2A1,SENP1,PFKM,CCDC184,ASB8,OR10AD1,H1FNT,ZNF641,ANP32D,C12ORF54,OR8S1,LALBA,KANSL2,CCNT1,CACNB3,ADCY6,DDX23,CCDC65,RND1,FKBP11,WNT1,ARF3,WNT10B,DDN,PRKAG1,KMT2D,RHEBL1,DHH,LMBR1L,TUBA1B,TUBA1C,TUBA1A,PRPH,TROAP,DNAJC22,SPATS2,C1QL4,KCNH3,MCRS1,PRPF40B,FAM186B,FMNL3,TMBIM6,NCKAP5L,BCDIN3D,FAIM2,AQP2,AQP5,AQP6,RACGAP1,ASIC1,SMARCD1,GPD1,COX14,CERS5…
int780:chr17:6368336..6437583	200	795960	54478,23746,83394,9851,84817,388327,51003,284111,54739,162517,83659	FAM64A,AIPL1,PITPNM3,KIAA0753,TXNDC17,C17ORF100,MED31,SLC13A5,XAF1,FBXO39,TEKT1
int781:chr1:46615056..46892812	503	143264	440585,149465,10969,128218,7075,149466,4352,991,23334,64834,112950,81888,5792,9682,6487,9048,9670,1802,533,8704,149473,6536,128209,55929,79033,55182,339541,79639,11004,6202,1263,149478,266675,343521,8643,8891,7389,79654,57643,84842,114034,4595,10420,25974,10327,5052,4678,149483,60313,51249,3652,23139,8503,10103,541468,55624,8438,7388,10489,387338,2166	FAM183A,CFAP57,EBNA1BP2,TMEM125,TIE1,C1ORF210,MPL,CDC20,SZT2,ELOVL1,MED8,HYI,PTPRF,KDM4A,ST3GAL3,ARTN,IPO13,DPH2,ATP6V0B,B4GALT2,CCDC24,SLC6A9,KLF17,DMAP1,ERI3,RNF220,C1ORF228,TMEM53,KIF2C,RPS8,PLK3,BTBD19,BEST4,TCTEX1D4,PTCH2,EIF2B3,UROD,HECTD3,ZSWIM5,HPDL,TOE1,MUTYH,TESK2,MMACHC,AKR1A1,PRDX1,NASP,CCDC17,GPBP1L1,TMEM69,IPP,MAST2,PIK3R3,TSPAN1,LURAP1,POMGNT1,RAD54L,UQCRH,LRRC41,NSUN4,FAAH
int782:chr7:24509698..24611183	256	855832	51678,1687,26031	MPP6,DFNA5,OSBPL3
int783,int286:chr19:6575461..6597962	103	308587	6294,9667,374875,25873,257062,125988,9361,4902,163154,56931,2528,2525,400673,828,2527,126328,8498,5990,81616,4298,125981,8192,84266,5623,2962,8570,92359,284427,79085,79958,8744,10382,970,8740,718,9322,7409,56927,10045,2015	SAFB,SAFB2,HSD11B1L,RPL36,CATSPERD,C19ORF70,LONP1,NRTN,PRR22,DUS3L,FUT6,FUT3,VMAC,CAPS,FUT5,NDUFA11,RANBP3,RFX2,ACSBG2,MLLT1,ACER1,CLPP,ALKBH7,PSPN,GTF2F1,KHSRP,CRB3,SLC25A41,SLC25A23,DENND1C,TNFSF9,TUBB4A,CD70,TNFSF14,C3,TRIP10,VAV1,GPR108,SH2D3A,ADGRE1
int784:chr22:44412952..44412952	1	3780332	150372,253190,27341,84271,1727,267020,53947,26286,11252,25809,638,706,27349,23170,80274,758,64800,25830,80339,150379,25813,29780,64098,85352	NFAM1,SERHL2,RRP7A,POLDIP3,CYB5R3,ATP5L2,A4GALT,ARFGAP3,PACSIN2,TTLL1,BIK,TSPO,MCAT,TTLL12,SCUBE1,MPPED1,EFCAB6,SULT4A1,PNPLA3,PNPLA5,SAMM50,PARVB,PARVG,KIAA1644
int785:chr8:38014429..38316849	298	50265	80139,11160,11212,25960,55290,80223,137362,155,1978,9070,9530,6770,27257,23259,84513,54904,137994,2260,389649	ZNF703,ERLIN2,PROSC,ADGRA2,BRF2,RAB11FIP1,GOT1L1,ADRB3,EIF4EBP1,ASH2L,BAG4,STAR,LSM1,DDHD2,PLPP5,WHSC1L1,LETM2,FGFR1,C8ORF86
int786,int958,int612:chr2:31245804..31351249	346	734437	79623,440854,30845	GALNT14,CAPN14,EHD3
int787:chr21:43447653..43454844	35	298021	54101,63977,25966,49854,89766,9619,7033,7032,53347,7031,64699,54020,89765,5152	RIPK4,PRDM15,C2CD2,ZBTB21,UMODL1,ABCG1,TFF3,TFF2,UBASH3A,TFF1,TMPRSS3,SLC37A1,RSPH1,PDE9A
int788:chr17:39235053..39653212	1245	842600	84152,10948,4761,8557,5409,2064,93210,2886,84299,22806,124626,100505591,55876,284110,94103,5709,1440,7067,9862,339287,22794,9572,51195,147179,990,5914,125111,7153,3487,84951,1236,6605,125113,192666,147183,353288,147184,342574,162605,3858,3859,54474,25984,390792,125115,85293,83897,83896,83895,728255,81850,100132476,81851,81872,728279,100132386,730755,85294,728224,653240,83755,81871,728318,85289,84…	PPP1R1B,STARD3,NEUROD2,TCAP,PNMT,ERBB2,PGAP3,GRB7,MIEN1,IKZF3,ZPBP2,LRRC3C,GSDMB,GSDMA,ORMDL3,PSMD3,CSF3,THRA,MED24,MSL1,CASC3,NR1D1,RAPGEFL1,WIPF2,CDC6,RARA,GJD3,TOP2A,IGFBP4,TNS4,CCR7,SMARCE1,KRT222,KRT24,KRT25,KRT26,TMEM99,KRT27,KRT28,KRT10,KRT12,KRT20,KRT23,KRT39,KRT40,KRTAP3-3,KRTAP3-2,KRTAP3-1,KRTAP1-5,KRTAP1-4,KRTAP1-3,KRTAP4-7,KRTAP1-1,KRTAP2-1,KRTAP2-2,KRTAP4-9,KRTAP2-3,KRTAP2-4,KRTAP4-8…
int789:chr17:198892..207714	35	435764	9501,400566,359845	RPH3AL,C17ORF97,FAM101B
int790:chr5:145467826..145674091	533	953957	153768,643226,153769,153770,51520,54439,5459	PRELID2,GRXCR2,SH3RF2,PLAC8L1,LARS,RBM27,POU4F3
int791:chr2:214845451..214845453	2	30147	22807,79582,402117	IKZF2,SPAG16,VWC2L
int792:chr10:134780983..134836543	179	15804	55844,664,282973,10570,282974,80313,170394,170393,3632,84504,54777	PPP2R2D,BNIP3,JAKMIP3,DPYSL4,STK32C,LRRC27,PWWP2B,C10ORF91,INPP5A,NKX6-2,CFAP46
int792:chr10:134780983..134836543	179	15804	84435,85442,8433,27287,118472,101,10844,118471,50632,196743,92170,282969,1892,503542,1571,93426,441581	ADGRA1,KNDC1,UTF1,VENTX,ZNF511,ADAM8,TUBGCP2,PRAP1,CALY,PAOX,MTG1,FUOM,ECHS1,SPRN,CYP2E1,SYCE1,FRG2B
int793:chr6:89790564..89867561	165	674904	8732,10957,135295,135293,2569,2570,51465,58528,22881,57226,23195,9994,84694,60468	RNGTT,PNRC1,SRSF12,PM20D2,GABRR1,GABRR2,UBE2J1,RRAGD,ANKRD6,LYRM2,MDN1,CASP8AP2,GJA10,BACH2
int796:chr3:28277894..28644307	497	161183	152100,152098,64343	CMC1,ZCWPW2,AZI2
int797:chr2:160325291..160465641	274	614730	85461,151525,29994,64844,9936,100526664,4065,22925,3694,5937	TANC1,WDSUB1,BAZ2B,MARCH7,CD302,LY75-CD302,LY75,PLA2R1,ITGB6,RBMS1
int79:chr17:1182166..1204291	124	166577	55275,79850,55178,50628,51031,64359,29928,29,727857,286753	VPS53,FAM57A,RNMTL1,GEMIN4,GLOD4,NXN,TIMM22,ABR,BHLHA9,TUSC5
int8,int750:chr11:132912844..132936734	62	653715	4978	OPCML
int800:chr13:42155821..42184822	53	445686	23078,160851,11215	VWA8,DGKH,AKAP11
int802:chr12:4734085..4734085	1	3780332	894,57103,8074,2251,57102,10635,8798,4704,10566,26290,3742,3736	CCND2,TIGAR,FGF23,FGF6,C12ORF4,RAD51AP1,DYRK4,NDUFA9,AKAP3,GALNT8,KCNA6,KCNA1
int803,int176:chr2:162193238..162878404	1118	150999	10010,10213,10716	TANK,PSMD14,TBR1
int803,int176:chr2:162193238..162878404	1118	150999	57282,1803,2641,2191,64135,25801,90134	SLC4A10,DPP4,GCG,FAP,IFIH1,GCA,KCNH7
int804:chr10:11959691..12107640	498	699130	26019,55526,55176,8872,11164	UPF2,DHTKD1,SEC61A2,CDC123,NUDT5
int806:chr18:74030680..74061749	39	173131	9658,400658	ZNF516,C18ORF65
int807,int254:chr3:50058610..50412945	361	11125	1232,1230,729230,1234,9034,4057,83597,79442,6997,259236,259173,29122,100287362,377047,5745,339906,4634,151903,23218,29072,64147,23276,25930,22937,54859,10675,6599,22907,4134,993,820,51385,10201,646424,285231,51372,84126,5364,11277,79714,51246,5210,90226,1294,7384,440955,65010,1951,51517,51447,5576,788,10425,646450,54681,11180,25915,55152,3615,54870,5859,10869,3913,200942,339834,64925,646498,37534…	CCR3,CCR1,CCR2,CCR5,CCRL2,LTF,RTP3,LRRC2,TDGF1,TMIE,ALS2CL,PRSS50,PRSS46,PRSS45,PTH1R,PRSS42,MYL3,CCDC12,NBEAL2,SETD2,KIF9,KLHL18,PTPN23,SCAP,ELP6,CSPG5,SMARCC1,DHX30,MAP4,CDC25A,CAMP,ZNF589,NME6,SPINK8,FBXW12,TMA7,ATRIP,PLXNB1,TREX1,CCDC51,SHISA5,PFKFB4,UCN2,COL7A1,UQCRC1,TMEM89,SLC26A6,CELSR3,NCKIPSD,IP6K2,PRKAR2A,SLC25A20,ARIH2,ARIH2OS,P4HTM,WDR6,NDUFAF3,DALRD3,IMPDH2,QRICH1,QARS,USP19,LAMB2,K…
int809:chr12:52268138..52334814	183	447322	79657,8909,55652,10411,51564,7421,79022,1280,29843,5213,387856,140461,121275,341567,121274,23519,121273,341568,3906,54934,904,784,112,9416,85478,27289,51303,7471,377,7480,23109,5571,8085,121268,50846,55716,10376,84790,7846,5630,10024,79962,65244,338761,23416,10445,25766,84070,91010,7009,57701,144233,23017,359,362,363,29127,41,6602,2819,84987,91012,51474,121006,113251,57609,466,283471,25840,613227…	RPAP3,ENDOU,SLC48A1,RAPGEF3,HDAC7,VDR,TMEM106C,COL2A1,SENP1,PFKM,CCDC184,ASB8,OR10AD1,H1FNT,ZNF641,ANP32D,C12ORF54,OR8S1,LALBA,KANSL2,CCNT1,CACNB3,ADCY6,DDX23,CCDC65,RND1,FKBP11,WNT1,ARF3,WNT10B,DDN,PRKAG1,KMT2D,RHEBL1,DHH,LMBR1L,TUBA1B,TUBA1C,TUBA1A,PRPH,TROAP,DNAJC22,SPATS2,C1QL4,KCNH3,MCRS1,PRPF40B,FAM186B,FMNL3,TMBIM6,NCKAP5L,BCDIN3D,FAIM2,AQP2,AQP5,AQP6,RACGAP1,ASIC1,SMARCD1,GPD1,COX14,CERS5…
int810:chr3:13156835..13205932	140	753350	6854,7079,5468,80746,23609,100129480,5894,55287,23066,6161,9922	SYN2,TIMP4,PPARG,TSEN2,MKRN2,MKRN2OS,RAF1,TMEM40,CAND2,RPL32,IQSEC1
int811,int467,int28,int837:chr9:16679305..16910872	935	298793	54796	BNC2
int813:chr19:14792529..14864228	275	495698	976,5585,10212,5731,10755,9524,3337,388512,4713,84658,84449,30817,26664,26659,390892,26333,26658,6511,126402,23581,126370,85360,10994,4854,79852,23476,10270,26993,58525,64926,126410,114770,11283,4051,66002,26538,26532,284433,26539,8529,126541,57834,7171,4218,84941,26017,8907,117286,10365,58513,84167,125972,10523,79939,9441,79041,79086,284434,23309,9002,27151,4650,93323,55850,79629,29086,126549,20…	ADGRE5,PKN1,DDX39A,PTGER1,GIPC1,TECR,DNAJB1,CLEC17A,NDUFB7,ADGRE3,ZNF333,ADGRE2,OR7C1,OR7A5,OR7A10,OR7A17,OR7C2,SLC1A6,CCDC105,CASP14,OR1I1,SYDE1,ILVBL,NOTCH3,EPHX3,BRD4,AKAP8,AKAP8L,WIZ,RASAL3,CYP4F22,PGLYRP2,CYP4F8,CYP4F3,CYP4F12,OR10H2,OR10H3,OR10H5,OR10H1,CYP4F2,OR10H4,CYP4F11,TPM4,RAB8A,HSH2D,FAM32A,AP1M1,CIB3,KLF2,EPS15L1,C19ORF44,CALR3,CHERP,SLC35E1,MED26,TMEM38A,SMIM7,NWD1,SIN3B,F2RL3,CPA…
int814:chr10:108930271..109353186	1199	909164	114815	SORCS1
int816:chr7:122853731..122853731	1	3780332	6561	SLC13A1
int817:chr1:234765989..234789591	75	629291	359948	IRF2BP2
int821:chr5:1039278..1094670	158	769354	79844,9319,65980,85409,10723,340024,348932,7015,81037,6531,79888	ZDHHC11,TRIP13,BRD9,NKD2,SLC12A7,SLC6A19,SLC6A18,TERT,CLPTM1L,SLC6A3,LPCAT1
int822:chr2:72395464..73084166	876	85573	56603,23233,6697,2016,94097,26056,344022,10322,10574,84279,150726,1961,7840,9027,51471,51002,388960,8446,10617,72,1716,200424,388962,10797,55233,57835,1639,84058,83444,23559,388963,6242,64427,7841,3196,116540,84865,27429,85474,1796,84759,165545,550,84695,130951,10505	CYP26B1,EXOC6B,SPR,EMX1,SFXN5,RAB11FIP5,NOTO,SMYD5,CCT7,PRADC1,FBXO41,EGR4,ALMS1,NAT8,NAT8B,TPRKB,C2ORF78,DUSP11,STAMBP,ACTG2,DGUOK,TET3,BOLA3,MTHFD2,MOB1A,SLC4A5,DCTN1,WDR54,INO80B,WBP1,C2ORF81,RTKN,TTC31,MOGS,TLX2,MRPL53,CCDC142,HTRA2,LBX2,DOK1,PCGF1,DQX1,AUP1,LOXL3,M1AP,SEMA4F
int823:chr2:1447040..1604276	669	279681	54221,7173	SNTG2,TPO
int825:chr14:63292605..63510678	469	787185	27133	KCNH5
int829:chr6:38338015..38342083	17	403809	266727,60685,114781,1769,2739,2740,55776,8645,89822,83795,221458,23500,4337	MDGA1,ZFAND3,BTBD9,DNAH8,GLO1,GLP1R,SAYSD1,KCNK5,KCNK17,KCNK16,KIF6,DAAM2,MOCS1
int831,int240,int846:chr5:16762024..16827737	198	765272	90441,54463,4651	ZNF622,FAM134B,MYO10
int833:chr8:82689212..82873063	546	873365	3612,92421,347051,79752,64089	IMPA1,CHMP4C,SLC10A5,ZFAND1,SNX16
int834,int232:chr10:97050555..97725111	1667	783213	1558,142827,9124,10580,5832,953,26123,100127889,387707,54619,9849,29760,1791,93377,7093,56889,118788,84458,26148,6585,84986,10023,23401,23223,5223,84287,51013,80019,64210,26287,112817,414157,55361,118812,83742,60370,118813,6425,401647,55118,27291,84171	CYP2C8,ACSM6,PDLIM1,SORBS1,ALDH18A1,ENTPD1,TCTN3,C10ORF131,CC2D2B,CCNJ,ZNF518A,BLNK,DNTT,OPALIN,TLL2,TM9SF3,PIK3AP1,LCOR,C10ORF12,SLIT1,ARHGAP19,FRAT1,FRAT2,RRP12,PGAM1,ZDHHC16,EXOSC1,UBTD1,MMS19,ANKRD2,HOGA1,C10ORF62,PI4K2A,MORN4,MARVELD1,AVPI1,ZFYVE27,SFRP5,GOLGA7B,CRTAC1,R3HCC1L,LOXL4
int835,int632:chr3:143499552..143872124	680	505549	285195,205428	SLC9A9,C3ORF58
int836:chr18:30456905..30805683	444	128418	374864,80816	CCDC178,ASXL3
int838:chr19:56535735..56538037	22	84307	91662,91663,5582,59284,59283,59285,284415,4696,26121,441864,4849,126014,29844,79042,6203,79165,147798,79143,11025,79168,10990,10288,11026,353514,23547,3903,57348,114823,3904,94059,148170,11027,11024,10859,11006,115653,3804,3802,3805,3811,3809,3812,2204,9437,55655,199713,51206,54869,112724,54776,7138,7137,352909,6861,5794,255043,22870,84446,23640,84787,284417,147744,6158,125965,284418,3589,388564,…	NLRP12,MYADM,PRKCG,CACNG7,CACNG8,CACNG6,VSTM1,NDUFA3,PRPF31,TARM1,CNOT3,OSCAR,TFPT,TSEN34,RPS9,LENG1,TMC4,MBOAT7,LILRB3,LILRA6,LILRB5,LILRB2,LILRA3,LILRA5,LILRA4,LAIR1,TTYH1,LENG8,LAIR2,LENG9,CDC42EP5,LILRA2,LILRA1,LILRB1,LILRB4,KIR3DL3,KIR2DL3,KIR2DL1,KIR2DL4,KIR3DL1,KIR2DS4,KIR3DL2,FCAR,NCR1,NLRP2,NLRP7,GP6,EPS8L1,RDH13,PPP1R12C,TNNT1,TNNI3,DNAAF3,SYT5,PTPRH,TMEM86B,PPP6R1,BRSK1,HSPBP1,SUV420H2…
int83:chr11:24759535..24770151	29	576432	338645	LUZP2
int843,int52:chr1:117812083..118100835	797	251008	5738,9398,8458,80263,79679	PTGFRN,CD101,TTF2,TRIM45,VTCN1
int843,int52:chr1:117812083..118100835	797	251008	10905,54855	MAN1A2,FAM46C
int844:chr15:74043523..74049061	16	515741	4756,10021,283677,27020,80381,388135,161514,4016,5371,9399,342096,57611,3671,64220,80125,1583,8482,84993,10620,1198,80153,1544,1543,1445,79748,594855,25989,4351,10066,57184,9377,192683,54913,60490	NEO1,HCN4,REC114,NPTN,CD276,C15ORF59,TBC1D21,LOXL1,PML,STOML1,GOLGA6A,ISLR2,ISLR,STRA6,CCDC33,CYP11A1,SEMA7A,UBL7,ARID3B,CLK3,EDC3,CYP1A2,CYP1A1,CSK,LMAN1L,CPLX3,ULK3,MPI,SCAMP2,FAM219B,COX5A,SCAMP5,RPP25,PPCDC
int845:chr17:77152842..77160151	29	432529	9267,57602,7077,3959,114897,124583,64772,146713	CYTH1,USP36,TIMP2,LGALS3BP,C1QTNF1,CANT1,ENGASE,RBFOX3
int847,int470:chr4:186491772..186859331	1395	314983	291,57587,83891,353322,55805,441054,55325,256309,27295,8470,7098,25854,285440,3818,2160	SLC25A4,CFAP97,SNX25,ANKRD37,LRP2BP,C4ORF47,UFSP2,CCDC110,PDLIM3,SORBS2,TLR3,FAM149A,CYP4V2,KLKB1,F11
int848:chr3:139922531..139953635	45	260484	64084	CLSTN2
int849:chr1:98297731..98562260	375	214952	1806	DPYD
int852:chr1:89847153..90065293	596	173370	5586,2959,56267,494115,2635,2633,2634,388646,115361,115362,163351	PKN2,GTF2B,CCBL2,RBMXL1,GBP3,GBP1,GBP2,GBP7,GBP4,GBP5,GBP6
int852:chr1:89847153..90065293	596	173370	23507,84230	LRRC8B,LRRC8C
int854,int733:chr6:53407591..53416684	16	348474	2729	GCLC
int857:chr19:48690847..48697961	22	381444	27076,653583,284346,23474,390940,7515,79177,100170229,126298,126299,199731,5329,56269,56006,3783,284349,284348,342908,7638,7596,7711,7773,7673,7766,342909,7767,7768,10780,7769,7770,353355,9310,7771,26974,7772,7733,125931,147710,5817,56971,388551,602,23624,4059,5819,10452,348,341,346,344,1209,5971,11129,79760,284352,162979,388552,284353,79090,57787,90332,147700,1158,2068,10849,10848,2067,2354,1476…	LYPD3,PHLDB3,ZNF575,ETHE1,PINLYP,XRCC1,ZNF576,SRRM5,IRGQ,ZNF428,CADM4,PLAUR,IRGC,SMG9,KCNN4,ZNF283,LYPD5,ZNF404,ZNF221,ZNF45,ZNF155,ZNF230,ZNF222,ZNF223,ZNF284,ZNF224,ZNF225,ZNF234,ZNF226,ZNF227,ZNF233,ZNF235,ZNF112,ZNF285,ZNF229,ZNF180,CEACAM20,IGSF23,PVR,CEACAM19,CEACAM16,BCL3,CBLC,BCAM,PVRL2,TOMM40,APOE,APOC1,APOC4,APOC2,CLPTM1,RELB,CLASRP,GEMIN7,PPP1R37,ZNF296,BLOC1S3,NKPD1,TRAPPC6A,MARK4,EXO…
int858:chr7:5177472..5187445	47	307267	26100,222962,84629,80028,60,6624,54476,654231,51622,7965,5395,100310846,27102,84132,9265,5879,84792,221955,11014,392862,55146,79034,54753,100131017,7559,222967,221960	WIPI2,SLC29A4,TNRC18,FBXL18,ACTB,FSCN1,RNF216,OCM,CCZ1,AIMP2,PMS2,ANKRD61,EIF2AK1,USP42,CYTH3,RAC1,FAM220A,DAGLB,KDELR2,GRID2IP,ZDHHC4,C7ORF26,ZNF853,ZNF316,ZNF12,RSPH10B,CCZ1B
int859:chr12:13081400..13092787	29	569250	79370,4040,118426,54682,80824,1389,2842,1027,81575,51202,9052,55507,50865,57613,83445,2012	BCL2L14,LRP6,BORCS5,MANSC1,DUSP16,CREBL2,GPR19,CDKN1B,APOLD1,DDX47,GPRC5A,GPRC5D,HEBP1,FAM234B,GSG1,EMP1
int86,int919:chr16:6656073..7604361	5471	16140	54715	RBFOX1
int860,int936:chr15:58628415..58835317	712	630491	3990,102,54629,79811,54778,9133,4643,92483,145773,9245,2958,663	LIPC,ADAM10,FAM63B,SLTM,RNF111,CCNB2,MYO1E,LDHAL6B,FAM81A,GCNT3,GTF2A2,BNIP2
int861,int395:chr19:4856287..4872275	68	306584	8612,54531,51298,126567,25759,8174,91978,284451,997,3004,682,610,27006,5442,10272,55658,5064,400668,126353,5725,566,5657,1991,1675,79948,84634,10025,1820,91300,57418,116444,1265,10347,91304,23526,2879,5434,22904,6794,513,90007,1153,55009,255057,1943,84939,374291,26528,6209,2593,10297,92840,148223,126520,54760,339366,399664,53615,10975,6929,390874,148229,57455,83855,113179,113178,81926,1455,55643,…	PLPP2,MIER2,THEG,C2CD4C,SHC2,MADCAM1,TPGS1,ODF3L2,CDC34,GZMM,BSG,HCN2,FGF22,POLRMT,FSTL3,RNF126,PALM,PRSS57,MISP,PTBP1,AZU1,PRTN3,ELANE,CFD,PLPPR3,KISS1R,MED16,ARID3A,R3HDM4,WDR18,GRIN3B,CNN2,ABCA7,TMEM259,HMHA1,GPX4,POLR2E,SBNO2,STK11,ATP5D,MIDN,CIRBP,C19ORF24,CBARP,EFNA2,MUM1,NDUFS7,DAZAP1,RPS15,GAMT,APC2,REEP6,C19ORF25,PLK5,PCSK4,ADAMTSL5,MEX3D,MBD3,UQCR11,TCF3,ONECUT3,ATP8B3,REXO1,KLF16,ADAT3…
int862:chr4:20253438..20253438	1	3780332	9353,133015,80333	SLIT2,PACRGL,KCNIP4
int864:chr1:28244854..28290746	157	621927	8289,55650,84243,2810,10726,54707,63906,8431,388610,126695,115572,6548,23038,84065,84958,2827,9064,8547,388611,10163,27245,2268,2537,199870,23673,5511,9473,27293,6118,55113,2140,5724,93974,22826,83667,54797,65979,1104,54952,115273,6883,10691,51441,4985,2035,399474,6429,10076,51102	ARID1A,PIGV,ZDHHC18,SFN,NUDC,GPN2,GPATCH3,NR0B2,TRNP1,KDF1,FAM46B,SLC9A1,WDTC1,TMEM222,SYTL1,GPR3,MAP3K6,FCN3,CD164L2,WASF2,AHDC1,FGR,IFI6,FAM76A,STX12,PPP1R8,THEMIS2,SMPDL3B,RPA2,XKR8,EYA3,PTAFR,ATPIF1,DNAJC8,SESN2,MED18,PHACTR4,RCC1,TRNAU1AP,RAB42,TAF12,GMEB1,YTHDF2,OPRD1,EPB41,TMEM200B,SRSF4,PTPRU,MECR
int870:chr22:46911745..46922134	48	319838	7477,55267,5465,55020,150383,51512,10343,55687,9620,23151,64781,25771	WNT7B,PRR34,PPARA,TTC38,CDPF1,GTSE1,PKDREJ,TRMU,CELSR1,GRAMD4,CERK,TBC1D22A
int871:chr19:47969394..48115083	178	41314	27076,653583,284346,23474,390940,7515,79177,100170229,126298,126299,199731,5329,56269,56006,3783,284349,284348,342908,7638,7596,7711,7773,7673,7766,342909,7767,7768,10780,7769,7770,353355,9310,7771,26974,7772,7733,125931,147710,5817,56971,388551,602,23624,4059,5819,10452,348,341,346,344,1209,5971,11129,79760,284352,162979,388552,284353,79090,57787,90332,147700,1158,2068,10849,10848,2067,2354,1476…	LYPD3,PHLDB3,ZNF575,ETHE1,PINLYP,XRCC1,ZNF576,SRRM5,IRGQ,ZNF428,CADM4,PLAUR,IRGC,SMG9,KCNN4,ZNF283,LYPD5,ZNF404,ZNF221,ZNF45,ZNF155,ZNF230,ZNF222,ZNF223,ZNF284,ZNF224,ZNF225,ZNF234,ZNF226,ZNF227,ZNF233,ZNF235,ZNF112,ZNF285,ZNF229,ZNF180,CEACAM20,IGSF23,PVR,CEACAM19,CEACAM16,BCL3,CBLC,BCAM,PVRL2,TOMM40,APOE,APOC1,APOC4,APOC2,CLPTM1,RELB,CLASRP,GEMIN7,PPP1R37,ZNF296,BLOC1S3,NKPD1,TRAPPC6A,MARK4,EXO…
int872:chr3:65307541..65327414	46	588755	9223,115286,26018	MAGI1,SLC25A26,LRIG1
int873:chr22:43167966..43182761	80	206366	150372,253190,27341,84271,1727,267020,53947,26286,11252,25809,638,706,27349,23170,80274,758,64800,25830,80339,150379,25813,29780,64098,85352	NFAM1,SERHL2,RRP7A,POLDIP3,CYB5R3,ATP5L2,A4GALT,ARFGAP3,PACSIN2,TTLL1,BIK,TSPO,MCAT,TTLL12,SCUBE1,MPPED1,EFCAB6,SULT4A1,PNPLA3,PNPLA5,SAMM50,PARVB,PARVG,KIAA1644
int875:chr1:54352928..54352928	1	2678571	284546,26994,22996,2060,114883,4898,5865,91408,51060,112970,9372,200014,84950,4998,23318,2882,348378,79699,65260,440590,6342,55268,127435,6512,1376,54987,4116,7804,63948,148979,55706,1733,54432,115353,51668,127428,388633,9528,200008,51253,606495,23648	C1ORF185,RNF11,TTC39A,EPS15,OSBPL9,NRD1,RAB3B,BTF3L4,TXNDC12,KTI12,ZFYVE9,CC2D1B,PRPF38A,ORC1,ZCCHC11,GPX7,FAM159A,ZYG11B,COA7,ZYG11A,SCP2,ECHDC2,PODN,SLC1A7,CPT2,C1ORF123,MAGOH,LRP8,DMRTB1,GLIS1,NDC1,DIO1,YIPF1,LRRC42,HSPB11,TCEANC2,LDLRAD1,TMEM59,CDCP2,MRPL37,CYB5RL,SSBP3
int876:chr12:31915159..32023666	512	186169	58516,160518,254013,196394,440093	FAM60A,DENND5B,METTL20,AMN1,H3F3C
int879:chr3:149255800..149293316	111	706353	116441,4071,7104,25937,51122,389161,11342,5217	TM4SF18,TM4SF1,TM4SF4,WWTR1,COMMD2,ANKUB1,RNF13,PFN2
int88,int679:chr7:70497737..70614846	346	843650	64409	WBSCR17
int883:chr1:161494127..161504858	32	578043	114836,8832,6504,962,57823,4063,51744,55600,142683,50848,100131187,7391,257106,126823,4817,81607,5202,51506,27005,5498,9191,4720,2207,8703,84134,9507,654790,336,9970,6391,4359,257177,2212,3310,9103,2214,2213,2215,84824,127943,11266,22926,25903,9722,400793,284680,117157,127933,6675,4921,51478	SLAMF6,CD84,SLAMF1,CD48,SLAMF7,LY9,CD244,ITLN1,ITLN2,F11R,TSTD1,USF1,ARHGAP30,KLHDC9,NIT1,PVRL4,PFDN2,UFC1,USP21,PPOX,DEDD,NDUFS2,FCER1G,B4GALT3,TOMM40L,ADAMTS4,PCP4L1,APOA2,NR1I3,SDHC,MPZ,CFAP126,FCGR2A,HSPA6,FCGR2C,FCGR3A,FCGR2B,FCGR3B,FCRLA,FCRLB,DUSP12,ATF6,OLFML2B,NOS1AP,C1ORF226,C1ORF111,SH2D1B,UHMK1,UAP1,DDR2,HSD17B7
int884:chr2:150160052..150193025	68	559845	130574	LYPD6
int887:chr1:225935369..225963665	110	465092	127602,3930,55740,6726,2052,9725,10637,29920,7044,163859,3020	DNAH14,LBR,ENAH,SRP9,EPHX1,TMEM63A,LEFTY1,PYCR2,LEFTY2,SDE2,H3F3A
int888:chr13:113459639..113497586	93	690099	10426,400165,23250,23263,2155,2159,8858,8451,55795,3916,79774,101928841,113622,55002,55208,7027,6011,496,348013,2621,643365	TUBGCP3,ATP11AUN,ATP11A,MCF2L,F7,F10,PROZ,CUL4A,PCID2,LAMP1,GRTP1,LOC101928841,ADPRHL1,TMCO3,DCUN1D2,TFDP1,GRK1,ATP4B,TMEM255B,GAS6,LINC00452
int890:chr22:24194941..24204630	35	498676	3543,51233,266747,150248,4320,6598,7621,29802,400916,66035,91319,4282,100037417,2953,653689,1652,391322,23523,2952,56241,2687,23384,135,51733,6634,2678,83606,388886	IGLL1,DRICH1,RGL4,C22ORF15,MMP11,SMARCB1,ZNF70,VPREB3,CHCHD10,SLC2A11,DERL3,MIF,DDTL,GSTT2,GSTT2B,DDT,LOC391322,CABIN1,GSTT1,SUSD2,GGT5,SPECC1L,ADORA2A,UPB1,SNRPD3,GGT1,GUCD1,LRRC75B
int891:chr13:95036778..95082174	151	649946	10082,1638,160897,23483	GPC6,DCT,GPR180,TGDS
int892:chr14:95948545..95964845	62	476387	161176,51218	SYNE3,GLRX5
int893:chr11:10536116..10561245	81	626684	272,100463486,50862,10894,10335,9646,1982,58486	AMPD3,MTRNR2L8,RNF141,LYVE1,MRVI1,CTR9,EIF4G2,ZBED5
int896:chr4:140664444..140676533	25	474122	80155,84709,4717,83452,80854,4258,55534,60592,1047,152586,255520,7350,23158	NAA15,MGARP,NDUFC1,RAB33B,SETD7,MGST2,MAML3,SCOC,CLGN,MGAT4D,ELMOD2,UCP1,TBC1D9
int897:chr17:49630076..49694162	151	745775	56934	CA10
int898:chr15:62874445..62911117	87	669888	83660	TLN2
int899:chr17:11190747..11234195	150	608543	388336,1770,6416,7566	SHISA6,DNAH9,MAP2K4,ZNF18
int89:chr12:132417451..132571956	180	121085	6433,4326,8408,80324,57634,79050,317781,50614	SFSWAP,MMP17,ULK1,PUS1,EP400,NOC4L,DDX51,GALNT9
int900,int732:chr1:66983920..67221552	845	543128	84251,200132,10022,79819,57708,23169,400757,149233,3595,26135	SGIP1,TCTEX1D1,INSL5,WDR78,MIER1,SLC35D1,C1ORF141,IL23R,IL12RB2,SERBP1
int902:chr22:46396775..46396775	1	3780332	7477,55267,5465,55020,150383,51512,10343,55687,9620,23151,64781,25771	WNT7B,PRR34,PPARA,TTC38,CDPF1,GTSE1,PKDREJ,TRMU,CELSR1,GRAMD4,CERK,TBC1D22A
int904,int37:chr21:33776671..33867280	260	836273	56246,54069,9875,59271	MRAP,MIS18A,URB1,EVA1C
int905:chr5:136989278..137171477	205	102781	26249,10949,9499,27039,51306,7478,8382,10112,10902,8697,2676,995,51307,51780,51308,1958,2107,3313	KLHL3,HNRNPA0,MYOT,PKD2L2,FAM13B,WNT8A,NME5,KIF20A,BRD8,CDC23,GFRA3,CDC25C,FAM53C,KDM3B,REEP2,EGR1,ETF1,HSPA9
int908:chr11:78399817..78440736	72	429404	2615,25987,55331,192134,726,4975,4647,220032,5058,282679,1207,51773,28971,92105,7069,65987,100532726,4718,79053,57558,283219,9846,79731,26011	LRRC32,TSKU,ACER3,B3GNT6,CAPN5,OMP,MYO7A,GDPD4,PAK1,AQP11,CLNS1A,RSF1,AAMDC,INTS4,THRSP,KCTD14,NDUFC2-KCTD14,NDUFC2,ALG8,USP35,KCTD21,GAB2,NARS2,TENM4
int909:chr12:86971635..87287609	557	463520	25834	MGAT4C
int90:chr7:73877809..73987405	191	452367	2006,3984,7458,7462,5982,7461,9569,2969,653361,84163	ELN,LIMK1,EIF4H,LAT2,RFC2,CLIP2,GTF2IRD1,GTF2I,NCF1,GTF2IRD2
int91,int574:chr11:35561328..35811024	394	325411	960,6506,25891,24147,54765	CD44,SLC1A2,PAMR1,FJX1,TRIM44
int910:chr1:169356004..169460865	227	718564	481,29922,8548,57821,10560,2153,6403,6402,6401,55732,92342,57147,22920,149281	ATP1B1,NME7,BLZF1,CCDC181,SLC19A2,F5,SELP,SELL,SELE,C1ORF112,METTL18,SCYL3,KIFAP3,METTL11B
int911:chr1:107631400..107704997	106	257404	55170,22854	PRMT6,NTNG1
int912:chr7:4952056..5007993	224	436394	221937,9907,55698,56903,100505381,57786,100533952	FOXK1,AP5Z1,RADIL,PAPOLB,MMD2,RBAK,RBAK-RBAKDN
int915:chr16:11460924..11475167	87	147190	8651,7142,58531,5620,5619,116028	SOCS1,TNP2,PRM3,PRM2,PRM1,RMI2
int916:chr17:42009211..42272586	443	405358	4222,284067,50964,1845,146894,4356,4355,5539,5697,162417,84336,92579,124801,10014,78995,92591,79089,56970,7343,6521,10900,2896,51629,284069,3674,23131,2535	MEOX1,C17ORF105,SOST,DUSP3,CD300LG,MPP3,MPP2,PPY,PYY,NAGS,TMEM101,G6PC3,LSM12,HDAC5,C17ORF53,ASB16,TMUB2,ATXN7L3,UBTF,SLC4A1,RUNDC3A,GRN,SLC25A39,FAM171A2,ITGA2B,GPATCH8,FZD2
int917:chr21:40505513..40839630	984	881894	8624,54014,7485,3150,6450,150082	PSMG1,BRWD1,WRB,HMGN1,SH3BGR,LCA5L
int920:chr19:15797558..15918455	612	115877	976,5585,10212,5731,10755,9524,3337,388512,4713,84658,84449,30817,26664,26659,390892,26333,26658,6511,126402,23581,126370,85360,10994,4854,79852,23476,10270,26993,58525,64926,126410,114770,11283,4051,66002,26538,26532,284433,26539,8529,126541,57834,7171,4218,84941,26017,8907,117286,10365,58513,84167,125972,10523,79939,9441,79041,79086,284434,23309,9002,27151,4650,93323,55850,79629,29086,126549,20…	ADGRE5,PKN1,DDX39A,PTGER1,GIPC1,TECR,DNAJB1,CLEC17A,NDUFB7,ADGRE3,ZNF333,ADGRE2,OR7C1,OR7A5,OR7A10,OR7A17,OR7C2,SLC1A6,CCDC105,CASP14,OR1I1,SYDE1,ILVBL,NOTCH3,EPHX3,BRD4,AKAP8,AKAP8L,WIZ,RASAL3,CYP4F22,PGLYRP2,CYP4F8,CYP4F3,CYP4F12,OR10H2,OR10H3,OR10H5,OR10H1,CYP4F2,OR10H4,CYP4F11,TPM4,RAB8A,HSH2D,FAM32A,AP1M1,CIB3,KLF2,EPS15L1,C19ORF44,CALR3,CHERP,SLC35E1,MED26,TMEM38A,SMIM7,NWD1,SIN3B,F2RL3,CPA…
int921:chr13:95785721..95819942	84	676238	10257,9071,22873,5611,55757,266722	ABCC4,CLDN10,DZIP1,DNAJC3,UGGT2,HS6ST3
int923,int643:chr1:169651770..170054087	1349	575435	481,29922,8548,57821,10560,2153,6403,6402,6401,55732,92342,57147,22920,149281	ATP1B1,NME7,BLZF1,CCDC181,SLC19A2,F5,SELP,SELL,SELE,C1ORF112,METTL18,SCYL3,KIFAP3,METTL11B
int924:chr7:154554896..154565111	26	557603	1804	DPP6
int925:chr1:212735729..212830882	214	751094	467,149647	ATF3,FAM71A
int926:chr1:156647931..156655253	23	383809	23632,81611,79630,148523,54460,51107,9129,23248,80222,1893,54507,4170,2029,55204,84072,1520,1513,405,9869,8416,58497,29956,149428,55793,54964,10962,126626,56882,79626,100534012,79005,10500,8394,388695,29765,6944,5710,57592,5298,5993,5692,8991,23126,57530,7286,81609,284485,11189,51686,65005,11022,339398,6097,100191040,284486,117145,6281,6282,126637,7062,126638,388697,2312,388698,49860,254910,54544…	CA14,ANP32E,C1ORF54,CIART,MRPS21,APH1A,PRPF3,RPRD2,TARS2,ECM1,ADAMTSL4,MCL1,ENSA,GOLPH3L,HORMAD1,CTSS,CTSK,ARNT,SETDB1,ANXA9,PRUNE,CERS2,BNIPL,FAM63A,C1ORF56,MLLT11,GABPB2,CDC42SE1,TNFAIP8L2,TNFAIP8L2-SCNM1,SCNM1,SEMA6C,PIP5K1A,LYSMD1,TMOD4,VPS72,PSMD4,ZNF687,PI4KB,RFX5,PSMB4,SELENBP1,POGZ,CGN,TUFT1,SNX27,RIIAD1,CELF3,OAZ3,MRPL9,TDRKH,LINGO4,RORC,C2CD4D,THEM5,THEM4,S100A10,S100A11,TCHHL1,TCHH,RPT…
int927:chr8:23441600..23472541	224	43189	2675,23039,9046,10361,8822,2039,64760,79873,6440,55806,649,80346,203190,661,9796,55124,23516,5533,10174,64236,541565,57805,55909,1960,157310,23221,8795,8794,8793,8797,91782,203069,4017,9583,51312	GFRA2,XPO7,DOK2,NPM2,FGF17,DMTN,FAM160B2,NUDT18,SFTPC,HR,BMP1,REEP4,LGI3,POLR3D,PHYHIP,PIWIL2,SLC39A14,PPP3CC,SORBS3,PDLIM2,C8ORF58,CCAR2,BIN3,EGR3,PEBP4,RHOBTB2,TNFRSF10B,TNFRSF10C,TNFRSF10D,TNFRSF10A,CHMP7,R3HCC1,LOXL2,ENTPD4,SLC25A37
int928:chr20:41780017..41783638	10	461321	11122	PTPRT
int933:chr10:101285093..101285093	1	3780332	84795,3257,60495,26507,2805,159296	PYROXD2,HPS1,HPSE2,CNNM1,GOT1,NKX2-3
int934:chr10:12597881..12628735	112	541105	57118	CAMK1D
int935:chr19:56837099..56879488	103	702129	147949,147948,63934,57573,140612,388566,58491,147670,90485	ZNF583,ZNF582,ZNF667,ZNF471,ZFP28,ZNF470,ZNF71,SMIM17,ZNF835
int937,int75:chr3:33066986..33194990	375	856746	2720,10491,643853,26032,25827,7342,23122,10015	GLB1,CRTAP,TMPPE,SUSD5,FBXL2,UBP1,CLASP2,PDCD6IP
int938:chr3:151585256..151672755	217	829139	344752,13,56670	AADACL2,AADAC,SUCNR1
int939:chr6:109279211..109468770	303	351099	84071,27244,285753	ARMC2,SESN1,CEP57L1
int940:chr11:5378666..5399473	225	5901	143496,6737,119774,390036,119772,143502,390037,143501,390038,143503,55128,81285,256892,119694,119695,401665,119692,119687,81282,79324,56547,401666,119682,401667,119679,119678,390054,23538,283111,3043,100187828,3047,3048,3046,79339,390058,79345,390059,282763,390061,390064,390066,390063,50613,143630,340980,390067,117854,445372,53840,10346,85363,387748,390072,390077,390075,79473,390081,390078,390079…	OR52B4,TRIM21,OR52K2,OR52K1,OR52M1,OR52I2,OR52I1,C11ORF40,OR51D1,OR51E1,TRIM68,OR51E2,OR51F1,OR51F2,OR52R1,OR51T1,OR51S1,OR51A7,OR51G2,OR51G1,MMP26,OR51A4,OR51L1,OR51A2,OR52J3,OR52E2,OR52A5,OR52A1,OR51V1,HBB,HBD,HBG1,HBG2,HBE1,OR51B4,OR51B6,OR51B2,OR51M1,OR51B5,OR51Q1,OR51I2,OR52D1,OR51I1,UBQLN3,UBQLNL,OR52B6,OR52H1,TRIM6,TRIM6-TRIM34,TRIM34,TRIM22,TRIM5,OR56B1,OR52N4,OR52N2,OR52N5,OR52N1,OR52E4,…
int941:chr2:101451819..101498230	98	613255	4862,6160,11138,55571,284996,200407,731220	NPAS2,RPL31,TBC1D8,CNOT11,RNF149,CREG2,RFX8
int942:chr1:47687084..47997658	743	929286	1579,260293,199974,284541,10158,6886,6491,51727,2301,2306	CYP4A11,CYP4X1,CYP4Z1,CYP4A22,PDZK1IP1,TAL1,STIL,CMPK1,FOXE3,FOXD2
int943,int903,int230:chr19:56309224..56330079	111	200648	91662,91663,5582,59284,59283,59285,284415,4696,26121,441864,4849,126014,29844,79042,6203,79165,147798,79143,11025,79168,10990,10288,11026,353514,23547,3903,57348,114823,3904,94059,148170,11027,11024,10859,11006,115653,3804,3802,3805,3811,3809,3812,2204,9437,55655,199713,51206,54869,112724,54776,7138,7137,352909,6861,5794,255043,22870,84446,23640,84787,284417,147744,6158,125965,284418,3589,388564,…	NLRP12,MYADM,PRKCG,CACNG7,CACNG8,CACNG6,VSTM1,NDUFA3,PRPF31,TARM1,CNOT3,OSCAR,TFPT,TSEN34,RPS9,LENG1,TMC4,MBOAT7,LILRB3,LILRA6,LILRB5,LILRB2,LILRA3,LILRA5,LILRA4,LAIR1,TTYH1,LENG8,LAIR2,LENG9,CDC42EP5,LILRA2,LILRA1,LILRB1,LILRB4,KIR3DL3,KIR2DL3,KIR2DL1,KIR2DL4,KIR3DL1,KIR2DS4,KIR3DL2,FCAR,NCR1,NLRP2,NLRP7,GP6,EPS8L1,RDH13,PPP1R12C,TNNT1,TNNI3,DNAAF3,SYT5,PTPRH,TMEM86B,PPP6R1,BRSK1,HSPBP1,SUV420H2…
int946:chr11:9964346..10331664	1166	734984	65975,9866,6157,6764,56672,56673,56676,56674,56675,57758,23258,440026,10527,7702,7465,23075,81846,133	STK33,TRIM66,RPL27A,ST5,AKIP1,C11ORF16,ASCL3,TMEM9B,NRIP3,SCUBE2,DENND5A,TMEM41B,IPO7,ZNF143,WEE1,SWAP70,SBF2,ADM
int947:chr21:28392015..28541902	643	273523	9510,11096	ADAMTS1,ADAMTS5
int948:chr18:23805393..24047874	520	142981	6760,143471,6875	SS18,PSMA8,TAF4B
int948:chr18:23805393..24047874	520	142981	284252	KCTD1
int951:chr12:27861268..27957674	216	748304	23012,56938,341346,8496,387849,60488,57542,100287284	STK38L,ARNTL2,SMCO2,PPFIBP1,REP15,MRPS35,KLHL42,MANSC4
int952:chr11:5160096..5194616	109	667317	143496,6737,119774,390036,119772,143502,390037,143501,390038,143503,55128,81285,256892,119694,119695,401665,119692,119687,81282,79324,56547,401666,119682,401667,119679,119678,390054,23538,283111,3043,100187828,3047,3048,3046,79339,390058,79345,390059,282763,390061,390064,390066,390063,50613,143630,340980,390067,117854,445372,53840,10346,85363,387748,390072,390077,390075,79473,390081,390078,390079…	OR52B4,TRIM21,OR52K2,OR52K1,OR52M1,OR52I2,OR52I1,C11ORF40,OR51D1,OR51E1,TRIM68,OR51E2,OR51F1,OR51F2,OR52R1,OR51T1,OR51S1,OR51A7,OR51G2,OR51G1,MMP26,OR51A4,OR51L1,OR51A2,OR52J3,OR52E2,OR52A5,OR52A1,OR51V1,HBB,HBD,HBG1,HBG2,HBE1,OR51B4,OR51B6,OR51B2,OR51M1,OR51B5,OR51Q1,OR51I2,OR52D1,OR51I1,UBQLN3,UBQLNL,OR52B6,OR52H1,TRIM6,TRIM6-TRIM34,TRIM34,TRIM22,TRIM5,OR56B1,OR52N4,OR52N2,OR52N5,OR52N1,OR52E4,…
int953:chr16:83692881..83756988	268	370985	1012,3281,23417,29948,54550,146167,8720,123872,83693,161931,9013,93107,58189,9914,57707,23406,79786,9100,83716	CDH13,HSBP1,MLYCD,OSGIN1,NECAB2,SLC38A8,MBTPS1,DNAAF1,HSDL1,ADAD2,TAF1C,KCNG4,WFDC1,ATP2C2,TLDC1,COTL1,KLHL36,USP10,CRISPLD2
int954:chr2:27281034..27934711	743	10727	8648,79172,391356,109,51277,22979,5443,1788,1838,55252,3797,10890,150946,3030,3032,85465,165082,92749,9381,339778,130106,3777,54978,1058,56896,22924,54867,60509,11117,3795,100128731,84696,150921,10669,10113,339779,51374,790,8884,285126,57159,7781,7349,4358,9784,2976,8890,130557,29959,5496,200634,26160,2646,64838,84226,84450,11321,22950,79635,9913,9553,64080,9577,2355,151056	NCOA1,CENPO,PTRHD1,ADCY3,DNAJC27,EFR3B,POMC,DNMT3A,DTNB,ASXL2,KIF3C,RAB10,GAREML,HADHA,HADHB,EPT1,ADGRF3,DRC1,OTOF,C2ORF70,CIB4,KCNK3,SLC35F6,CENPA,DPYSL5,MAPRE3,TMEM214,AGBL5,EMILIN1,KHK,OST4,ABHD1,TCF23,CGREF1,PREB,PRR30,ATRAID,CAD,SLC5A6,DNAJC5G,TRIM54,SLC30A3,UCN,MPV17,SNX17,GTF3C2,EIF2B4,ZNF513,NRBP1,PPM1G,KRTCAP3,IFT172,GCKR,FNDC4,C2ORF16,ZNF512,GPN1,SLC4A1AP,CCDC121,SUPT7L,MRPL33,RBKS,BRE,…
int955:chr10:100240052..100240617	6	147240	84795,3257,60495,26507,2805,159296	PYROXD2,HPS1,HPSE2,CNNM1,GOT1,NKX2-3
int966,int414:chr2:206952515..207224602	547	684820	54891,1933,4719,2825,57683	INO80D,EEF1B2,NDUFS1,GPR1,ZDBF2
int969:chr8:2827474..2911322	307	565716	64478	CSMD1
int96:chr9:74729250..74815119	240	839488	138240,9615	C9ORF57,GDA
int970:chr11:58467814..58640992	339	63773	10249	GLYAT
int970:chr11:58467814..58640992	339	63773	219970,92292	GLYATL2,GLYATL1
int971,int944:chr4:75760504..75983102	404	520864	685,25849	BTC,PARM1
int972:chr20:18058000..18104554	155	650346	92667,27131,58495,100303755,57325	MGME1,SNX5,OVOL2,PET117,CSRP2BP
int974:chr8:41723550..41935324	319	282391	51125,84296,137964,157848,286,7994,10947,5327,3551,5423,7419,27121,6575,114926	GOLGA7,GINS4,GPAT4,NKX6-3,ANK1,KAT6A,AP3M2,PLAT,IKBKB,POLB,VDAC3,DKK4,SLC20A2,SMIM19
int975:chr16:89106321..89132011	68	666137	84627,161882,124245,27189,1535,4597,348180,333929,115992,9780,81620,51693,353,2588,390748,863,197322,1013,197320,146429,29123,6687,6137,27132,1800,124045,8558,5119,92822,124044,9605,2175,84501,22980,4157,10381,54849,2622,92806,79007,11105	ZNF469,ZFPM1,ZC3H18,IL17C,CYBA,MVD,CTU2,SNAI3,RNF166,PIEZO1,CDT1,TRAPPC2L,APRT,GALNS,PABPN1L,CBFA2T3,ACSF3,CDH15,ZNF778,SLC22A31,ANKRD11,SPG7,RPL13,CPNE7,DPEP1,SPATA33,CDK10,CHMP1A,ZNF276,SPATA2L,VPS9D1,FANCA,SPIRE2,TCF25,MC1R,TUBB3,DEF8,GAS8,CENPBD1,DBNDD1,PRDM7
int976:chr2:170274818..170578931	954	780297	253782,115677,57818,57405,8647,10170,4036,129880,10324,79675,9360,493911,100526832,129881,151230,6741,130507,29081	CERS6,NOSTRIN,G6PC2,SPC25,ABCB11,DHRS9,LRP2,BBS5,KLHL41,FASTKD1,PPIG,PHOSPHO2,PHOSPHO2-KLHL23,CCDC173,KLHL23,SSB,UBR3,METTL5
int977:chr13:74674871..74841329	280	415170	11278	KLF12
int978:chr1:167503778..167532812	163	149704	57645,117143,387597,84944,92235,10223,5451,919,8804,92241,9019,55811,55827,25874,23432,261726,375035,9095	POGK,TADA1,ILDR2,MAEL,DUSP27,GPA33,POU2F1,CD247,CREG1,RCSD1,MPZL1,ADCY10,DCAF6,MPC2,GPR161,TIPRL,SFT2D2,TBX19
int979:chr10:26160650..26484154	1582	76425	53904,2572	MYO3A,GAD2
int97:chr2:118368816..118873792	1536	408316	54520,51141	CCDC93,INSIG2
int97:chr2:118368816..118873792	1536	408316	8886	DDX18
int983,int302,int623,int669:chr1:151833831..152141922	466	268072	23632,81611,79630,148523,54460,51107,9129,23248,80222,1893,54507,4170,2029,55204,84072,1520,1513,405,9869,8416,58497,29956,149428,55793,54964,10962,126626,56882,79626,100534012,79005,10500,8394,388695,29765,6944,5710,57592,5298,5993,5692,8991,23126,57530,7286,81609,284485,11189,51686,65005,11022,339398,6097,100191040,284486,117145,6281,6282,126637,7062,126638,388697,2312,388698,49860,254910,54544…	CA14,ANP32E,C1ORF54,CIART,MRPS21,APH1A,PRPF3,RPRD2,TARS2,ECM1,ADAMTSL4,MCL1,ENSA,GOLPH3L,HORMAD1,CTSS,CTSK,ARNT,SETDB1,ANXA9,PRUNE,CERS2,BNIPL,FAM63A,C1ORF56,MLLT11,GABPB2,CDC42SE1,TNFAIP8L2,TNFAIP8L2-SCNM1,SCNM1,SEMA6C,PIP5K1A,LYSMD1,TMOD4,VPS72,PSMD4,ZNF687,PI4KB,RFX5,PSMB4,SELENBP1,POGZ,CGN,TUFT1,SNX27,RIIAD1,CELF3,OAZ3,MRPL9,TDRKH,LINGO4,RORC,C2CD4D,THEM5,THEM4,S100A10,S100A11,TCHHL1,TCHH,RPT…
int984:chr19:54540779..54544575	22	235192	91662,91663,5582,59284,59283,59285,284415,4696,26121,441864,4849,126014,29844,79042,6203,79165,147798,79143,11025,79168,10990,10288,11026,353514,23547,3903,57348,114823,3904,94059,148170,11027,11024,10859,11006,115653,3804,3802,3805,3811,3809,3812,2204,9437,55655,199713,51206,54869,112724,54776,7138,7137,352909,6861,5794,255043,22870,84446,23640,84787,284417,147744,6158,125965,284418,3589,388564,…	NLRP12,MYADM,PRKCG,CACNG7,CACNG8,CACNG6,VSTM1,NDUFA3,PRPF31,TARM1,CNOT3,OSCAR,TFPT,TSEN34,RPS9,LENG1,TMC4,MBOAT7,LILRB3,LILRA6,LILRB5,LILRB2,LILRA3,LILRA5,LILRA4,LAIR1,TTYH1,LENG8,LAIR2,LENG9,CDC42EP5,LILRA2,LILRA1,LILRB1,LILRB4,KIR3DL3,KIR2DL3,KIR2DL1,KIR2DL4,KIR3DL1,KIR2DS4,KIR3DL2,FCAR,NCR1,NLRP2,NLRP7,GP6,EPS8L1,RDH13,PPP1R12C,TNNT1,TNNI3,DNAAF3,SYT5,PTPRH,TMEM86B,PPP6R1,BRSK1,HSPBP1,SUV420H2…
int985:chr1:240300129..240300129	1	3780332	56776,64388	FMN2,GREM2
int986:chr4:146748044..146821410	119	363454	4086,166785,646603,152485	SMAD1,MMAA,C4ORF51,ZNF827
int987,int495:chr10:80878219..80972653	251	859809	57178,10105,219654,143244,729238,653509,729262	ZMIZ1,PPIF,ZCCHC24,EIF5AL1,SFTPA2,SFTPA1,NUTM2B
int988:chr15:57762793..57783948	77	522548	6938,84952,100820829,145781,81488	TCF12,CGNL1,MYZAP,GCOM1,POLR2M
int98:chr9:6568116..6610892	109	723455	90865,89882,115426,2731,23081	IL33,TPD52L3,UHRF2,GLDC,KDM4C
int990:chr2:202613635..202666254	113	641689	9689,60491,1195,53938,4999,285172,4709,8837,843,841,130540,66008,55437,151254,65062,58538,57679,65061	BZW1,NIF3L1,CLK1,PPIL3,ORC2,FAM126B,NDUFB3,CFLAR,CASP10,CASP8,ALS2CR12,TRAK2,STRADB,ALS2CR11,TMEM237,MPP4,ALS2,CDK15
int991:chr12:16205657..16254406	135	756159	85004,5800,2059,11171,51071	RERG,PTPRO,EPS8,STRAP,DERA
int992:chr12:29680874..29773473	261	848857	55711,51290,341350,83857	FAR2,ERGIC2,OVCH1,TMTC1
int994:chr10:21406811..21458310	82	341993	10529,387638	NEBL,C10ORF113
int995:chr6:149813940..150180259	578	298599	23118,387082,340152,85313,116254,11104,9113,5110,348995,84918,135250,80328,80329,353091	TAB2,SUMO4,ZC3H12D,PPIL4,GINM1,KATNA1,LATS1,PCMT1,NUP43,LRP11,RAET1E,ULBP2,ULBP1,RAET1G
int996,int913:chr1:210939131..211643017	1611	575343	343035,7779,4751,9926	RD3,SLC30A1,NEK2,LPGAT1
int996,int913:chr1:210939131..211643017	1611	575343	57172,3914,50486,3290,80342,27042,148304,3664,255928,56256,55733,3756,55758,7188	CAMK1G,LAMB3,G0S2,HSD11B1,TRAF3IP3,DIEXF,C1ORF74,IRF6,SYT14,SERTAD4,HHAT,KCNH1,RCOR3,TRAF5
int997:chr12:125097041..125097710	5	251944	338442,8562,8843,84660,27198,9026,79720,23457,79676,51329,57605,10198,91574,8099,55206,387893,11066,196383,353116,10959,57696,2967,1967,79867,23545,196385,144348,100533183,80212,144347,9612	HCAR2,DENR,HCAR3,CCDC62,HCAR1,HIP1R,VPS37B,ABCB9,OGFOD2,ARL6IP4,PITPNM2,MPHOSPH9,C12ORF65,CDK2AP1,SBNO1,SETD8,SNRNP35,RILPL2,RILPL1,TMED2,DDX55,GTF2H3,EIF2B1,TCTN2,ATP6V0A2,DNAH10,ZNF664,ZNF664-FAM101A,CCDC92,FAM101A,NCOR2
int999:chr17:9126903..9133394	66	30073	146849,388333,162387,146850,23533,9423,9482,146845,124739	CCDC42,SPDYE4,MFSD6L,PIK3R6,PIK3R5,NTN1,STX8,CFAP52,USP43
