# Supplementary material for: Meta-analysis of GWAS of over 16,000 individuals with autism spectrum disorder highlights a novel locus at 10q24.32 and a significant overlap with schizophrenia
Source: Mol Autism. 2017 May 22;8:21. doi: 10.1186/s13229-017-0137-9 (PMC5441062; doi:10.1186/s13229-017-0137-9)
Supplement: Supplementary file 14 — Summary finding for ASD (World-wide Ancestries; no Swedish PAGES) and Schizophrenia (PMID: 25056061) Meta-analysis; Data reported on P ˂ 5E-8; all associations. (XLS 154 KB) [file 13229_2017_137_MOESM14_ESM.xls]

## Sheet: GWS AUT SCZ findings
MARKER	MARKER LOCATION	A1	ODDS RATIO (95%CI) - PGC AUT	ODDS RATIO (95%CI) - PGC SCZ	ODDS RATIO (95%CI) - PGC Combined	P-VALUE - PGC AUT	P-VALUE - PGC SCZ	P-VALUE - PGC Combined	ASSOCIATED REGION (CLUMP)	GENES IN REGION
rs115329265	chr6:28712247	A	1.02 (0.95-1.09)	1.21 (1.17-1.25)	1.17 (1.14-1.21)	0.6309	3.861e-32	2.099e-27	chr6:28240991..29484110	GPX5 GPX6 HCG14 LINC01556 LINC01623 LOC100129636 MAS1L OR10C1 OR11A1 OR12D2 OR12D3 OR14J1 OR2B3 OR2H1 OR2J2 OR2J3 OR2W1 OR5V1 PGBD1 TRIM27 ZBED9 ZKSCAN3 ZNF311 ZSCAN12 ZSCAN23 ZSCAN26 ZSCAN31
rs116137698	chr6:28667669	A	1.02 (0.93-1.11)	1.26 (1.21-1.31)	1.22 (1.17-1.26)	0.6951	3.107e-30	2.85e-26	chr6:27668300..29660816	GABBR1 GPX5 GPX6 HCG14 HIST1H1B HIST1H2AI HIST1H2AJ HIST1H2AK HIST1H2AL HIST1H2AM HIST1H2BL HIST1H2BM HIST1H2BN HIST1H2BO HIST1H3H HIST1H3I HIST1H3J HIST1H4J HIST1H4K HIST1H4L LINC01012 LINC01015 LINC01556 LINC01623 LOC100129636 LOC100131289 MAS1L MOG NKAPL OR10C1 OR11A1 OR12D2 OR12D3 OR14J1 OR2B2 OR2B3 OR2B6 OR2H1 OR2H2 OR2J2 OR2J3 OR2W1 OR5V1 PGBD1 SNORD32B TOB2P1 TRIM27 UBD ZBED9 ZFP57 ZKSCAN3…
rs141342723	chr6:27622084	T	1.04 (0.95-1.14)	1.23 (1.19-1.28)	1.20 (1.16-1.24)	0.3499	1.823e-26	4.222e-24	chr6:26631568..28619353	GPX5 GPX6 GUSBP2 HIST1H1B HIST1H2AG HIST1H2AH HIST1H2AI HIST1H2AJ HIST1H2AK HIST1H2AL HIST1H2AM HIST1H2BJ HIST1H2BK HIST1H2BL HIST1H2BM HIST1H2BN HIST1H2BO HIST1H3H HIST1H3I HIST1H3J HIST1H4I HIST1H4J HIST1H4K HIST1H4L LINC00240 LINC01012 LOC100131289 LOC100270746 MIR3143 NKAPL OR2B2 OR2B6 PGBD1 POM121L2 PRSS16 TOB2P1 VN1R10P ZBED9 ZKSCAN3 ZKSCAN4 ZKSCAN8 ZNF165 ZNF184 ZNF192P1 ZNF204P ZNF322 ZNF…
rs75782365	chr6:26408551	T	1.03 (0.94-1.13)	1.25 (1.20-1.30)	1.21 (1.16-1.25)	0.5319	8.891e-27	7.572e-24	chr6:25480328..27406607	ABT1 BTN1A1 BTN2A1 BTN2A2 BTN2A3P BTN3A1 BTN3A2 BTN3A3 GUSBP2 HCG11 HFE HIST1H1A HIST1H1C HIST1H1D HIST1H1E HIST1H1T HIST1H2AA HIST1H2AB HIST1H2AC HIST1H2AD HIST1H2AE HIST1H2AG HIST1H2AH HIST1H2APS1 HIST1H2BA HIST1H2BB HIST1H2BC HIST1H2BD HIST1H2BE HIST1H2BF HIST1H2BG HIST1H2BH HIST1H2BI HIST1H2BJ HIST1H2BK HIST1H3A HIST1H3B HIST1H3C HIST1H3D HIST1H3E HIST1H3F HIST1H3G HIST1H4A HIST1H4B HIST1H4C …
rs151267808	chr6:29850720	T	1.05 (0.94-1.17)	1.29 (1.23-1.35)	1.24 (1.19-1.30)	0.4052	3.053e-25	9.958e-23	chr6:28851572..30842629	ABCF1 ATAT1 C6orf136 DHX16 FLOT1 GABBR1 GNL1 HCG14 HCG17 HCG18 HCG4 HCG4B HCG8 HCG9 HLA-A HLA-E HLA-F HLA-F-AS1 HLA-G HLA-H HLA-J HLA-L IER3 IFITM4P LINC00243 LINC01015 LINC01556 LOC100129636 LOC554223 MAS1L MDC1 MDC1-AS1 MIR6891 MIR877 MOG MRPS18B NRM OR10C1 OR11A1 OR12D2 OR12D3 OR14J1 OR2B3 OR2H1 OR2H2 OR2J2 OR2J3 OR2W1 OR5V1 PPP1R10 PPP1R11 PPP1R18 PRR3 RNF39 RPP21 SNORD32B TRIM10 TRIM15 TRIM2…
rs7746199	chr6:27261324	T	1.02 (0.96-1.08)	0.86 (0.83-0.88)	0.88 (0.86-0.91)	0.5639	3.35e-26	9.873e-21	chr6:26743531..27390115	GUSBP2 HIST1H2AG HIST1H2AH HIST1H2BJ HIST1H2BK HIST1H4I LINC00240 LOC100270746 MIR3143 POM121L2 PRSS16 VN1R10P ZNF204P ZNF391
rs114115252	chr6:30899195	A	0.95 (0.88-1.03)	0.84 (0.81-0.87)	0.86 (0.83-0.89)	0.231	2.973e-21	8.231e-20	chr6:29905437..31892484	ABCF1 ABHD16A AIF1 APOM ATAT1 ATP6V1G2 ATP6V1G2-DDX39B BAG6 C2 C6orf136 C6orf15 C6orf25 C6orf47 C6orf48 CCHCR1 CDSN CLIC1 CSNK2B DDAH2 DDR1 DDX39B DHX16 DPCR1 EHMT2 FLOT1 GNL1 GPANK1 GTF2H4 HCG17 HCG18 HCG22 HCG26 HCG27 HCG8 HCG9 HCP5 HLA-A HLA-B HLA-C HLA-E HLA-J HLA-L HSPA1A HSPA1B HSPA1L IER3 LINC00243 LSM2 LST1 LTA LTB LY6G5B LY6G5C LY6G6C LY6G6D LY6G6E LY6G6F MCCD1 MDC1 MDC1-AS1 MICA MICB MI…
rs1782810	chr1:98502340	A	1.11 (1.05-1.18)	1.12 (1.09-1.15)	1.12 (1.09-1.15)	0.0006567	3.071e-17	1.072e-19	chr1:98152581..98604137	DPYD DPYD-AS2 MIR137 MIR137HG MIR2682
rs6921919	chr6:28325201	C	1.04 (0.99-1.11)	1.13 (1.10-1.16)	1.12 (1.09-1.14)	0.1366	1.334e-20	1.163e-19	chr6:27885980..28700352	GPX5 GPX6 NKAPL OR2B6 PGBD1 TOB2P1 ZBED9 ZKSCAN3 ZKSCAN4 ZKSCAN8 ZNF165 ZNF192P1 ZSCAN12 ZSCAN12P1 ZSCAN16 ZSCAN16-AS1 ZSCAN23 ZSCAN26 ZSCAN31 ZSCAN9
rs9467711	chr6:26332605	A	1.02 (0.95-1.10)	1.19 (1.15-1.23)	1.16 (1.12-1.19)	0.5308	4.34e-22	3.336e-19	chr6:25734470..27290082	ABT1 BTN1A1 BTN2A1 BTN2A2 BTN2A3P BTN3A1 BTN3A2 BTN3A3 GUSBP2 HCG11 HFE HIST1H1A HIST1H1C HIST1H1D HIST1H1E HIST1H1T HIST1H2AB HIST1H2AC HIST1H2AD HIST1H2AE HIST1H2AG HIST1H2AH HIST1H2BB HIST1H2BC HIST1H2BD HIST1H2BE HIST1H2BF HIST1H2BG HIST1H2BH HIST1H2BI HIST1H2BJ HIST1H2BK HIST1H3A HIST1H3B HIST1H3C HIST1H3D HIST1H3E HIST1H3F HIST1H3G HIST1H4A HIST1H4B HIST1H4C HIST1H4D HIST1H4E HIST1H4F HIST1…
rs115707823	chr6:30342753	A	0.95 (0.87-1.04)	0.82 (0.79-0.86)	0.84 (0.81-0.88)	0.2688	1.655e-19	5.84e-18	chr6:29356687..31175946	ABCF1 ATAT1 C6orf136 C6orf15 CCHCR1 CDSN DDR1 DHX16 DPCR1 FLOT1 GABBR1 GNL1 GTF2H4 HCG17 HCG18 HCG22 HCG27 HCG4 HCG4B HCG8 HCG9 HLA-A HLA-E HLA-F HLA-F-AS1 HLA-G HLA-H HLA-J HLA-L IER3 IFITM4P LINC00243 LINC01015 LOC554223 MAS1L MDC1 MDC1-AS1 MIR4640 MIR6891 MIR877 MOG MRPS18B MUC21 MUC22 NRM OR10C1 OR11A1 OR12D2 OR2H1 OR2H2 POU5F1 PPP1R10 PPP1R11 PPP1R18 PRR3 PSORS1C1 PSORS1C2 PSORS1C3 RNF39 RPP…
rs116633139	chr6:32667910	A	1.00 (0.92-1.09)	0.84 (0.81-0.87)	0.86 (0.83-0.89)	0.9638	3.997e-21	6.193e-18	chr6:31671557..32879471	AGER AGPAT1 ATF6B BTNL2 C2 C2-AS1 C4A C4B C4B_2 C6orf10 C6orf25 C6orf48 CFB CLIC1 CYP21A1P CYP21A2 DDAH2 DXO EGFL8 EHMT2 FKBPL GPSM3 HCG23 HLA-DOB HLA-DQA1 HLA-DQA2 HLA-DQB1 HLA-DQB2 HLA-DRA HLA-DRB1 HLA-DRB5 HLA-DRB6 HSPA1A HSPA1B HSPA1L LOC100294145 LOC100507547 LSM2 LY6G6C LY6G6D LY6G6E LY6G6F MIR1236 MIR3135B MIR6721 MIR6833 MSH5 MSH5-SAPCD1 NELFE NEU1 NOTCH4 PBX2 PPT2 PPT2-EGFL8 PRRT1 PSMB8 …
rs115123779	chr6:29477821	T	1.00 (0.93-1.07)	0.85 (0.82-0.88)	0.87 (0.85-0.90)	0.9434	2.487e-21	9.98e-18	chr6:28671343..30073259	GABBR1 HCG14 HCG4 HCG4B HCG8 HCG9 HLA-A HLA-F HLA-F-AS1 HLA-G HLA-H HLA-J IFITM4P LINC01015 LINC01556 LINC01623 LOC100129636 LOC554223 MAS1L MOG OR10C1 OR11A1 OR12D2 OR12D3 OR14J1 OR2B3 OR2H1 OR2H2 OR2J2 OR2J3 OR2W1 OR5V1 PPP1R11 RNF39 SNORD32B TRIM27 TRIM31 TRIM31-AS1 UBD ZFP57 ZNF311 ZNRD1 ZNRD1-AS1
rs116326873	chr6:29809826	A	1.12 (1.05-1.19)	1.13 (1.10-1.16)	1.13 (1.10-1.16)	0.0007022	6.388e-15	2.143e-17	chr6:29606761..30323110	HCG17 HCG18 HCG4 HCG4B HCG8 HCG9 HLA-A HLA-F HLA-F-AS1 HLA-G HLA-H HLA-J HLA-L IFITM4P LOC554223 MIR6891 MOG PPP1R11 RNF39 RPP21 TRIM10 TRIM15 TRIM26 TRIM31 TRIM31-AS1 TRIM39 TRIM39-RPP21 TRIM40 ZFP57 ZNRD1 ZNRD1-AS1
rs144762289	chr6:31196862	A	0.95 (0.88-1.03)	0.84 (0.81-0.87)	0.86 (0.83-0.89)	0.2361	1.144e-18	2.843e-17	chr6:30204247..32194630	ABCF1 ABHD16A AGER AGPAT1 AIF1 APOM ATAT1 ATF6B ATP6V1G2 ATP6V1G2-DDX39B BAG6 C2 C2-AS1 C4A C4B C4B_2 C6orf136 C6orf15 C6orf25 C6orf47 C6orf48 CCHCR1 CDSN CFB CLIC1 CSNK2B CYP21A1P CYP21A2 DDAH2 DDR1 DDX39B DHX16 DPCR1 DXO EGFL8 EHMT2 FKBPL FLOT1 GNL1 GPANK1 GPSM3 GTF2H4 HCG17 HCG18 HCG22 HCG26 HCG27 HCP5 HLA-B HLA-C HLA-E HLA-L HSPA1A HSPA1B HSPA1L IER3 LINC00243 LOC100507547 LSM2 LST1 LTA LTB L…
rs9348739	chr6:26923099	C	0.94 (0.88-1.01)	0.87 (0.84-0.90)	0.88 (0.86-0.91)	0.1119	2.151e-17	4.507e-17	chr6:26377028..27274834	ABT1 BTN1A1 BTN2A1 BTN2A2 BTN2A3P BTN3A1 BTN3A2 BTN3A3 GUSBP2 HCG11 HIST1H2AG HIST1H2AH HIST1H2BJ HIST1H2BK HIST1H4I HMGN4 LINC00240 LOC100270746 LOC285819 MIR3143 PRSS16 ZNF322
rs116408368	chr6:30170510	T	1.00 (0.93-1.08)	1.19 (1.15-1.24)	1.15 (1.12-1.19)	0.9737	1.003e-20	6.774e-17	chr6:29335154..30741305	ABCF1 ATAT1 C6orf136 DHX16 FLOT1 GABBR1 GNL1 HCG17 HCG18 HCG4 HCG4B HCG8 HCG9 HLA-A HLA-E HLA-F HLA-F-AS1 HLA-G HLA-H HLA-J HLA-L IER3 IFITM4P LINC01015 LOC554223 MAS1L MDC1 MDC1-AS1 MIR6891 MIR877 MOG MRPS18B NRM OR10C1 OR11A1 OR12D2 OR12D3 OR2H1 OR2H2 PPP1R10 PPP1R11 PPP1R18 PRR3 RNF39 RPP21 SNORD32B TRIM10 TRIM15 TRIM26 TRIM31 TRIM31-AS1 TRIM39 TRIM39-RPP21 TRIM40 TUBB UBD ZFP57 ZNRD1 ZNRD1-AS1
rs11191419	chr10:104612335	A	0.97 (0.93-1.02)	0.91 (0.89-0.93)	0.92 (0.90-0.94)	0.2895	9.235e-18	1.16e-16	chr10:104487871..104969578	AS3MT BORCS7 BORCS7-ASMT CNNM2 CYP17A1 NT5C2 SFXN2 WBP1L
rs115242751	chr6:30122623	T	1.00 (0.92-1.09)	1.22 (1.17-1.27)	1.17 (1.13-1.22)	0.9458	2.209e-20	1.276e-16	chr6:29559238..30879636	ABCF1 ATAT1 C6orf136 DDR1 DHX16 FLOT1 GABBR1 GNL1 GTF2H4 HCG17 HCG18 HCG4 HCG4B HCG8 HCG9 HLA-A HLA-E HLA-F HLA-F-AS1 HLA-G HLA-H HLA-J HLA-L IER3 IFITM4P LINC00243 LOC554223 MDC1 MDC1-AS1 MIR4640 MIR6891 MIR877 MOG MRPS18B NRM PPP1R10 PPP1R11 PPP1R18 PRR3 RNF39 RPP21 TRIM10 TRIM15 TRIM26 TRIM31 TRIM31-AS1 TRIM39 TRIM39-RPP21 TRIM40 TUBB ZFP57 ZNRD1 ZNRD1-AS1
rs114867672	chr6:30931844	T	1.05 (0.97-1.13)	1.17 (1.13-1.21)	1.15 (1.11-1.18)	0.2294	1.2e-17	1.575e-16	chr6:29986324..31085356	ABCF1 ATAT1 C6orf136 C6orf15 CDSN DDR1 DHX16 DPCR1 FLOT1 GNL1 GTF2H4 HCG17 HCG18 HCG22 HLA-E HLA-L IER3 LINC00243 MDC1 MDC1-AS1 MIR4640 MIR6891 MIR877 MRPS18B MUC21 MUC22 NRM PPP1R10 PPP1R11 PPP1R18 PRR3 PSORS1C1 RNF39 RPP21 SFTA2 TRIM10 TRIM15 TRIM26 TRIM31 TRIM31-AS1 TRIM39 TRIM39-RPP21 TRIM40 TUBB VARS2 ZNRD1 ZNRD1-AS1
rs114882497	chr6:32391192	T	1.03 (0.96-1.11)	1.15 (1.12-1.19)	1.13 (1.10-1.17)	0.3647	7.322e-18	1.608e-16	chr6:32223418..32555962	BTNL2 C6orf10 HCG23 HLA-DRA HLA-DRB1 HLA-DRB5 HLA-DRB6
rs116385615	chr6:31881309	T	0.98 (0.91-1.05)	1.15 (1.12-1.19)	1.12 (1.09-1.16)	0.5988	5.38e-20	1.902e-16	chr6:31596138..32131972	ABHD16A APOM ATF6B BAG6 C2 C2-AS1 C4A C4B C4B_2 C6orf25 C6orf47 C6orf48 CFB CLIC1 CSNK2B CYP21A1P CYP21A2 DDAH2 DXO EHMT2 FKBPL GPANK1 HSPA1A HSPA1B HSPA1L LOC100507547 LSM2 LY6G5B LY6G5C LY6G6C LY6G6D LY6G6E LY6G6F MIR1236 MIR4646 MIR6832 MSH5 MSH5-SAPCD1 NELFE NEU1 PPT2 PPT2-EGFL8 PRRC2A PRRT1 SAPCD1 SAPCD1-AS1 SKIV2L SLC44A4 SNORD48 SNORD52 STK19 TNXA TNXB VARS VWA7 ZBTB12
rs202906	chr6:28011652	T	1.01 (0.94-1.08)	1.16 (1.12-1.20)	1.13 (1.10-1.17)	0.8442	8.477e-19	3.393e-16	chr6:27433029..28305508	HIST1H1B HIST1H2AI HIST1H2AJ HIST1H2AK HIST1H2AL HIST1H2AM HIST1H2BL HIST1H2BM HIST1H2BN HIST1H2BO HIST1H3H HIST1H3I HIST1H3J HIST1H4J HIST1H4K HIST1H4L LINC01012 LOC100131289 NKAPL OR2B2 OR2B6 PGBD1 TOB2P1 ZKSCAN4 ZKSCAN8 ZNF165 ZNF184 ZNF192P1 ZSCAN12P1 ZSCAN16 ZSCAN16-AS1 ZSCAN26 ZSCAN31 ZSCAN9
rs13212562	chr6:27300310	A	1.01 (0.94-1.09)	1.17 (1.13-1.22)	1.14 (1.11-1.18)	0.7298	1.078e-18	3.494e-16	chr6:26599509..28002388	ABT1 GUSBP2 HIST1H1B HIST1H2AG HIST1H2AH HIST1H2AI HIST1H2AJ HIST1H2AK HIST1H2AL HIST1H2AM HIST1H2BJ HIST1H2BK HIST1H2BL HIST1H2BM HIST1H2BN HIST1H2BO HIST1H3H HIST1H3I HIST1H3J HIST1H4I HIST1H4J HIST1H4K HIST1H4L LINC00240 LINC01012 LOC100131289 LOC100270746 MIR3143 OR2B2 OR2B6 POM121L2 PRSS16 VN1R10P ZNF184 ZNF204P ZNF322 ZNF391
rs114276265	chr6:31187075	T	0.96 (0.91-1.02)	0.90 (0.88-0.92)	0.91 (0.89-0.93)	0.155	1.493e-16	4.498e-16	chr6:31112737..31275277	CCHCR1 HCG27 HLA-C POU5F1 PSORS1C3 TCF19
rs116427960	chr6:31319226	T	0.98 (0.91-1.05)	0.86 (0.84-0.89)	0.88 (0.86-0.91)	0.5391	3.177e-18	4.966e-16	chr6:30323393..32131972	ABCF1 ABHD16A AIF1 APOM ATAT1 ATF6B ATP6V1G2 ATP6V1G2-DDX39B BAG6 C2 C2-AS1 C4A C4B C4B_2 C6orf136 C6orf15 C6orf25 C6orf47 C6orf48 CCHCR1 CDSN CFB CLIC1 CSNK2B CYP21A1P CYP21A2 DDAH2 DDR1 DDX39B DHX16 DPCR1 DXO EHMT2 FKBPL FLOT1 GNL1 GPANK1 GTF2H4 HCG22 HCG26 HCG27 HCP5 HLA-B HLA-C HLA-E HSPA1A HSPA1B HSPA1L IER3 LINC00243 LOC100507547 LSM2 LST1 LTA LTB LY6G5B LY6G5C LY6G6C LY6G6D LY6G6E LY6G6F M…
rs59574136	chr7:2036460	T	1.09 (1.04-1.14)	1.08 (1.06-1.11)	1.08 (1.06-1.11)	0.0007585	2.04e-13	6.589e-16	chr7:1806591..2326816	FTSJ2 MAD1L1 MIR4655 MIR6836 NUDT1 SNX8
rs114041423	chr6:29607047	A	0.93 (0.87-0.99)	0.90 (0.87-0.92)	0.90 (0.88-0.92)	0.0209	7.492e-15	1.051e-15	chr6:29536462..30038352	GABBR1 HCG4 HCG4B HCG8 HCG9 HLA-A HLA-F HLA-F-AS1 HLA-G HLA-H HLA-J IFITM4P LOC554223 MOG OR2H2 PPP1R11 RNF39 SNORD32B ZFP57 ZNRD1 ZNRD1-AS1
rs6940116	chr6:27708732	A	1.04 (0.97-1.10)	1.13 (1.10-1.16)	1.11 (1.08-1.14)	0.2892	1.359e-16	1.52e-15	chr6:27410422..28301099	HIST1H1B HIST1H2AI HIST1H2AJ HIST1H2AK HIST1H2AL HIST1H2AM HIST1H2BL HIST1H2BM HIST1H2BN HIST1H2BO HIST1H3H HIST1H3I HIST1H3J HIST1H4J HIST1H4K HIST1H4L LINC01012 LOC100131289 NKAPL OR2B2 OR2B6 PGBD1 TOB2P1 ZKSCAN4 ZKSCAN8 ZNF165 ZNF184 ZNF192P1 ZSCAN12P1 ZSCAN16 ZSCAN16-AS1 ZSCAN26 ZSCAN31 ZSCAN9
rs116663187	chr6:28578286	A	1.07 (1.01-1.14)	1.12 (1.09-1.15)	1.11 (1.08-1.14)	0.02639	9.043e-15	1.578e-15	chr6:28216486..29346329	GPX5 GPX6 HCG14 LINC01556 LINC01623 LOC100129636 NKAPL OR12D3 OR14J1 OR2B3 OR2J2 OR2J3 OR2W1 OR5V1 PGBD1 TRIM27 ZBED9 ZKSCAN3 ZKSCAN4 ZNF311 ZSCAN12 ZSCAN23 ZSCAN26 ZSCAN31
rs111639056	chr6:32538476	A	1.01 (0.93-1.10)	0.85 (0.82-0.88)	0.87 (0.84-0.90)	0.779	1.482e-18	1.988e-15	chr6:32387278..32610445	HLA-DQA1 HLA-DRA HLA-DRB1 HLA-DRB5 HLA-DRB6
rs114964506	chr6:30782205	C	0.96 (0.89-1.04)	0.86 (0.83-0.89)	0.87 (0.85-0.90)	0.3223	1.311e-16	2.223e-15	chr6:29970960..31566168	ABCF1 ATAT1 ATP6V1G2 ATP6V1G2-DDX39B C6orf136 C6orf15 CCHCR1 CDSN DDR1 DDX39B DHX16 DPCR1 FLOT1 GNL1 GTF2H4 HCG17 HCG18 HCG22 HCG26 HCG27 HCG8 HCP5 HLA-B HLA-C HLA-E HLA-J HLA-L IER3 LINC00243 LST1 LTA LTB MCCD1 MDC1 MDC1-AS1 MICA MICB MIR4640 MIR6891 MIR877 MRPS18B MUC21 MUC22 NCR3 NFKBIL1 NRM POU5F1 PPP1R10 PPP1R11 PPP1R18 PRR3 PSORS1C1 PSORS1C2 PSORS1C3 RNF39 RPP21 SFTA2 SNORD117 SNORD84 TCF19…
rs6939532	chr6:26534024	T	0.99 (0.92-1.06)	0.87 (0.85-0.90)	0.89 (0.87-0.92)	0.7247	1.575e-17	2.499e-15	chr6:26534024..26534024	NONE
rs114904464	chr6:31348077	A	0.99 (0.92-1.06)	0.87 (0.84-0.89)	0.88 (0.86-0.91)	0.6996	2.093e-17	2.796e-15	chr6:30374211..32345689	ABCF1 ABHD16A AGER AGPAT1 AIF1 APOM ATAT1 ATF6B ATP6V1G2 ATP6V1G2-DDX39B BAG6 C2 C2-AS1 C4A C4B C4B_2 C6orf10 C6orf136 C6orf15 C6orf25 C6orf47 C6orf48 CCHCR1 CDSN CFB CLIC1 CSNK2B CYP21A1P CYP21A2 DDAH2 DDR1 DDX39B DHX16 DPCR1 DXO EGFL8 EHMT2 FKBPL FLOT1 GNL1 GPANK1 GPSM3 GTF2H4 HCG22 HCG26 HCG27 HCP5 HLA-B HLA-C HLA-E HSPA1A HSPA1B HSPA1L IER3 LINC00243 LOC100507547 LSM2 LST1 LTA LTB LY6G5B LY6G…
rs145547914	chr6:32206243	T	0.99 (0.92-1.07)	0.87 (0.84-0.90)	0.89 (0.86-0.91)	0.8403	1.601e-17	3.268e-15	chr6:31745464..32666526	AGER AGPAT1 ATF6B BTNL2 C2 C2-AS1 C4A C4B C4B_2 C6orf10 C6orf48 CFB CYP21A1P CYP21A2 DXO EGFL8 EHMT2 FKBPL GPSM3 HCG23 HLA-DQA1 HLA-DQB1 HLA-DRA HLA-DRB1 HLA-DRB5 HLA-DRB6 HSPA1A HSPA1B HSPA1L LOC100507547 LSM2 MIR1236 MIR6721 MIR6833 NELFE NEU1 NOTCH4 PBX2 PPT2 PPT2-EGFL8 PRRT1 RNF5 RNF5P1 SKIV2L SLC44A4 SNORD48 SNORD52 STK19 TNXA TNXB VARS ZBTB12
rs9269271	chr6:32539107	T	1.03 (0.97-1.10)	1.12 (1.09-1.15)	1.11 (1.08-1.14)	0.3082	3.802e-16	4.458e-15	chr6:32395465..32596908	HLA-DRA HLA-DRB1 HLA-DRB5 HLA-DRB6
rs140502984	chr6:31449552	T	0.99 (0.91-1.07)	1.16 (1.12-1.20)	1.13 (1.10-1.17)	0.7755	4.028e-18	5.239e-15	chr6:30495860..32424992	ABCF1 ABHD16A AGER AGPAT1 AIF1 APOM ATAT1 ATF6B ATP6V1G2 ATP6V1G2-DDX39B BAG6 BTNL2 C2 C2-AS1 C4A C4B C4B_2 C6orf10 C6orf136 C6orf15 C6orf25 C6orf47 C6orf48 CCHCR1 CDSN CFB CLIC1 CSNK2B CYP21A1P CYP21A2 DDAH2 DDR1 DDX39B DHX16 DPCR1 DXO EGFL8 EHMT2 FKBPL FLOT1 GNL1 GPANK1 GPSM3 GTF2H4 HCG22 HCG23 HCG26 HCG27 HCP5 HLA-B HLA-C HLA-DRA HSPA1A HSPA1B HSPA1L IER3 LINC00243 LOC100507547 LSM2 LST1 LTA L…
rs114963521	chr6:30758857	T	0.97 (0.90-1.06)	0.85 (0.82-0.88)	0.87 (0.84-0.90)	0.5177	7.284e-17	5.288e-15	chr6:29970960..31326074	ABCF1 ATAT1 C6orf136 C6orf15 CCHCR1 CDSN DDR1 DHX16 DPCR1 FLOT1 GNL1 GTF2H4 HCG17 HCG18 HCG22 HCG27 HCG8 HLA-B HLA-C HLA-E HLA-J HLA-L IER3 LINC00243 MDC1 MDC1-AS1 MIR4640 MIR6891 MIR877 MRPS18B MUC21 MUC22 NRM POU5F1 PPP1R10 PPP1R11 PPP1R18 PRR3 PSORS1C1 PSORS1C2 PSORS1C3 RNF39 RPP21 SFTA2 TCF19 TRIM10 TRIM15 TRIM26 TRIM31 TRIM31-AS1 TRIM39 TRIM39-RPP21 TRIM40 TUBB VARS2 ZNRD1 ZNRD1-AS1
rs115035678	chr6:32349557	A	0.99 (0.91-1.08)	1.17 (1.13-1.22)	1.14 (1.10-1.18)	0.8233	1.293e-17	1.034e-14	chr6:31353171..32879471	ABHD16A AGER AGPAT1 AIF1 APOM ATF6B ATP6V1G2 ATP6V1G2-DDX39B BAG6 BTNL2 C2 C2-AS1 C4A C4B C4B_2 C6orf10 C6orf25 C6orf47 C6orf48 CFB CLIC1 CSNK2B CYP21A1P CYP21A2 DDAH2 DDX39B DXO EGFL8 EHMT2 FKBPL GPANK1 GPSM3 HCG23 HCG26 HCP5 HLA-DOB HLA-DQA1 HLA-DQA2 HLA-DQB1 HLA-DQB2 HLA-DRA HLA-DRB1 HLA-DRB5 HLA-DRB6 HSPA1A HSPA1B HSPA1L LOC100294145 LOC100507547 LSM2 LST1 LTA LTB LY6G5B LY6G5C LY6G6C LY6G6D …
rs9274390	chr6:32632660	T	0.99 (0.93-1.07)	1.17 (1.13-1.21)	1.13 (1.09-1.16)	0.8422	6.453e-18	2.499e-14	chr6:32630741..32635501	HLA-DQB1
rs78110044	chr6:32527110	C	1.06 (0.93-1.20)	0.79 (0.75-0.83)	0.82 (0.78-0.87)	0.3737	4.984e-18	3.29e-14	chr6:32527110..32671800	HLA-DQA1 HLA-DQB1 HLA-DRB1 HLA-DRB6
rs150680405	chr6:31223775	T	0.91 (0.84-1.00)	0.85 (0.82-0.89)	0.86 (0.83-0.90)	0.04399	8.41e-14	3.302e-14	chr6:31223775..31223775	NONE
rs11191582	chr10:104913653	A	0.99 (0.91-1.07)	0.86 (0.83-0.89)	0.88 (0.85-0.91)	0.7382	2.966e-16	3.537e-14	chr10:104229588..105175131	ACTR1A ARL3 AS3MT BORCS7 BORCS7-ASMT CNNM2 CYP17A1 INA MFSD13A MIR1307 NT5C2 PCGF6 PDCD11 RPEL1 SFXN2 SUFU TAF5 TRIM8 USMG5 WBP1L
rs115344853	chr6:32165444	A	1.00 (0.94-1.08)	1.14 (1.10-1.17)	1.12 (1.08-1.15)	0.927	1.884e-16	3.631e-14	chr6:31745464..32387432	AGER AGPAT1 ATF6B BTNL2 C2 C2-AS1 C4A C4B C4B_2 C6orf10 C6orf48 CFB CYP21A1P CYP21A2 DXO EGFL8 EHMT2 FKBPL GPSM3 HCG23 HSPA1A HSPA1B HSPA1L LOC100507547 LSM2 MIR1236 MIR6721 MIR6833 NELFE NEU1 NOTCH4 PBX2 PPT2 PPT2-EGFL8 PRRT1 RNF5 RNF5P1 SKIV2L SLC44A4 SNORD48 SNORD52 STK19 TNXA TNXB VARS ZBTB12
rs115497191	chr6:32904039	A	1.00 (0.90-1.10)	0.83 (0.80-0.87)	0.86 (0.82-0.89)	0.9543	2.128e-16	3.735e-14	chr6:31940897..32963948	AGER AGPAT1 ATF6B BRD2 BTNL2 C4A C4B C4B_2 C6orf10 CYP21A1P CYP21A2 EGFL8 FKBPL GPSM3 HCG23 HLA-DMA HLA-DMB HLA-DOB HLA-DQA1 HLA-DQA2 HLA-DQB1 HLA-DQB2 HLA-DRA HLA-DRB1 HLA-DRB5 HLA-DRB6 LOC100294145 LOC100507547 MIR3135B MIR6721 MIR6833 NOTCH4 PBX2 PPT2 PPT2-EGFL8 PRRT1 PSMB8 PSMB8-AS1 PSMB9 RNF5 RNF5P1 STK19 TAP1 TAP2 TNXA TNXB
rs7752195	chr6:25419094	T	1.00 (0.91-1.11)	0.83 (0.79-0.87)	0.86 (0.82-0.89)	0.9297	7.289e-17	3.892e-14	chr6:25356350..26328462	HFE HIST1H1A HIST1H1C HIST1H1D HIST1H1E HIST1H1T HIST1H2AA HIST1H2AB HIST1H2AC HIST1H2AD HIST1H2AE HIST1H2APS1 HIST1H2BA HIST1H2BB HIST1H2BC HIST1H2BD HIST1H2BE HIST1H2BF HIST1H2BG HIST1H2BH HIST1H2BI HIST1H3A HIST1H3B HIST1H3C HIST1H3D HIST1H3E HIST1H3F HIST1H3G HIST1H4A HIST1H4B HIST1H4C HIST1H4D HIST1H4E HIST1H4F HIST1H4G HIST1H4H LRRC16A SCGN SLC17A1 SLC17A2 SLC17A3 SLC17A4 TRIM38
rs116676919	chr6:30080496	A	0.98 (0.90-1.07)	0.84 (0.81-0.88)	0.87 (0.84-0.90)	0.6869	2.332e-16	4.188e-14	chr6:29090011..30985828	ABCF1 ATAT1 C6orf136 DDR1 DHX16 DPCR1 FLOT1 GABBR1 GNL1 GTF2H4 HCG17 HCG18 HCG4 HCG4B HCG8 HCG9 HLA-A HLA-E HLA-F HLA-F-AS1 HLA-G HLA-H HLA-J HLA-L IER3 IFITM4P LINC00243 LINC01015 LOC554223 MAS1L MDC1 MDC1-AS1 MIR4640 MIR6891 MIR877 MOG MRPS18B MUC21 MUC22 NRM OR10C1 OR11A1 OR12D2 OR12D3 OR14J1 OR2H1 OR2H2 OR2J2 OR5V1 PPP1R10 PPP1R11 PPP1R18 PRR3 RNF39 RPP21 SFTA2 SNORD32B TRIM10 TRIM15 TRIM26 T…
rs144911693	chr6:28659407	A	0.96 (0.91-1.01)	0.91 (0.89-0.93)	0.92 (0.90-0.94)	0.1446	2.133e-14	4.651e-14	chr6:27919243..29331819	GPX5 GPX6 HCG14 LINC01556 LINC01623 LOC100129636 NKAPL OR14J1 OR2B3 OR2B6 OR2J2 OR2J3 OR2W1 OR5V1 PGBD1 TOB2P1 TRIM27 ZBED9 ZKSCAN3 ZKSCAN4 ZKSCAN8 ZNF165 ZNF192P1 ZNF311 ZSCAN12 ZSCAN12P1 ZSCAN16 ZSCAN16-AS1 ZSCAN23 ZSCAN26 ZSCAN31 ZSCAN9
rs2007044	chr12:2344960	A	1.02 (0.97-1.06)	0.91 (0.89-0.93)	0.93 (0.91-0.95)	0.5338	2.625e-17	6.475e-14	chr12:2285731..2419518	CACNA1C CACNA1C-AS4 CACNA1C-IT3
rs115682897	chr6:32693294	A	1.00 (0.93-1.07)	0.88 (0.86-0.91)	0.90 (0.88-0.92)	0.9936	2.686e-16	6.564e-14	chr6:32685822..32758394	HLA-DQA2 HLA-DQB2 MIR3135B
rs149979052	chr6:31105147	T	1.00 (0.93-1.07)	0.88 (0.85-0.90)	0.89 (0.87-0.92)	0.9345	4.067e-16	7.044e-14	chr6:30248711..31807540	ABCF1 ABHD16A AIF1 APOM ATAT1 ATP6V1G2 ATP6V1G2-DDX39B BAG6 C6orf136 C6orf15 C6orf25 C6orf47 C6orf48 CCHCR1 CDSN CLIC1 CSNK2B DDAH2 DDR1 DDX39B DHX16 DPCR1 FLOT1 GNL1 GPANK1 GTF2H4 HCG17 HCG18 HCG22 HCG26 HCG27 HCP5 HLA-B HLA-C HLA-E HSPA1A HSPA1B HSPA1L IER3 LINC00243 LSM2 LST1 LTA LTB LY6G5B LY6G5C LY6G6C LY6G6D LY6G6E LY6G6F MCCD1 MDC1 MDC1-AS1 MICA MICB MIR4640 MIR4646 MIR6832 MIR6891 MIR877 …
rs1024582	chr12:2402246	A	0.99 (0.94-1.04)	1.10 (1.08-1.13)	1.08 (1.06-1.10)	0.5688	3.404e-17	8.09e-14	chr12:2286963..2420526	CACNA1C CACNA1C-AS4 CACNA1C-IT3
rs115625073	chr6:29892233	T	1.02 (0.96-1.09)	1.13 (1.10-1.17)	1.11 (1.08-1.14)	0.4942	2.277e-15	8.729e-14	chr6:29882530..30070937	HCG4B HCG8 HCG9 HLA-A HLA-J PPP1R11 RNF39 TRIM31 ZNRD1 ZNRD1-AS1
rs9273177	chr6:32613301	A	1.06 (0.98-1.14)	0.85 (0.82-0.88)	0.88 (0.86-0.91)	0.1662	9.101e-19	1.129e-13	chr6:32565075..32679326	HLA-DQA1 HLA-DQB1
rs61472021	chr6:26090025	T	1.03 (0.96-1.11)	1.14 (1.10-1.18)	1.12 (1.09-1.15)	0.3852	6.863e-15	1.238e-13	chr6:25700342..26338128	HFE HIST1H1A HIST1H1C HIST1H1D HIST1H1E HIST1H1T HIST1H2AA HIST1H2AB HIST1H2AC HIST1H2AD HIST1H2AE HIST1H2APS1 HIST1H2BA HIST1H2BB HIST1H2BC HIST1H2BD HIST1H2BE HIST1H2BF HIST1H2BG HIST1H2BH HIST1H2BI HIST1H3A HIST1H3B HIST1H3C HIST1H3D HIST1H3E HIST1H3F HIST1H3G HIST1H4A HIST1H4B HIST1H4C HIST1H4D HIST1H4E HIST1H4F HIST1H4G HIST1H4H SCGN SLC17A1 SLC17A2 SLC17A3 SLC17A4 TRIM38
rs184153866	chr6:32482297	A	1.04 (0.98-1.11)	1.12 (1.09-1.15)	1.10 (1.08-1.13)	0.2125	4.154e-14	1.686e-13	chr6:32457967..32601875	HLA-DRB1 HLA-DRB5 HLA-DRB6
rs115558405	chr6:32336766	A	1.03 (0.96-1.11)	1.14 (1.10-1.18)	1.12 (1.09-1.15)	0.4005	1.48e-14	1.833e-13	chr6:32147696..32424992	AGER BTNL2 C6orf10 GPSM3 HCG23 HLA-DRA NOTCH4 PBX2 RNF5 RNF5P1
rs150430679	chr6:30730339	T	1.04 (0.97-1.11)	1.14 (1.10-1.18)	1.12 (1.09-1.15)	0.2767	3.166e-14	2.611e-13	chr6:30726939..30796545	LINC00243
rs115687605	chr6:30365629	T	0.97 (0.89-1.05)	0.86 (0.82-0.89)	0.87 (0.84-0.91)	0.4348	1.389e-14	2.658e-13	chr6:29986324..30879636	ABCF1 ATAT1 C6orf136 DDR1 DHX16 FLOT1 GNL1 GTF2H4 HCG17 HCG18 HLA-E HLA-L IER3 LINC00243 MDC1 MDC1-AS1 MIR4640 MIR6891 MIR877 MRPS18B NRM PPP1R10 PPP1R11 PPP1R18 PRR3 RNF39 RPP21 TRIM10 TRIM15 TRIM26 TRIM31 TRIM31-AS1 TRIM39 TRIM39-RPP21 TRIM40 TUBB ZNRD1 ZNRD1-AS1
rs35324223	chr11:46402852	A	0.90 (0.84-0.95)	0.91 (0.89-0.94)	0.91 (0.89-0.93)	0.000268	1.892e-10	2.705e-13	chr11:46238567..47132724	AMBRA1 ARHGAP1 ATG13 C11orf49 CHRM4 CKAP5 CREB3L1 DGKZ F2 HARBI1 LRP4 LRP4-AS1 MDK MIR3160-1 MIR3160-2 MIR4688 MIR5582 SNORD67 ZNF408
rs9274299	chr6:32631958	T	0.99 (0.93-1.05)	0.89 (0.86-0.91)	0.90 (0.88-0.93)	0.6801	3.138e-15	3.583e-13	chr6:32559975..32728946	HLA-DQA1 HLA-DQA2 HLA-DQB1 HLA-DQB2 MIR3135B
rs138984909	chr6:32433819	A	1.00 (0.91-1.09)	1.18 (1.13-1.23)	1.14 (1.10-1.19)	0.9363	1.105e-15	4.354e-13	chr6:32428804..32454061	NONE
rs911186	chr6:27150599	A	1.02 (0.96-1.08)	1.11 (1.08-1.14)	1.09 (1.07-1.12)	0.5607	1.928e-14	4.866e-13	chr6:26467182..27256346	ABT1 BTN1A1 BTN2A1 GUSBP2 HCG11 HIST1H2AG HIST1H2AH HIST1H2BJ HIST1H2BK HIST1H4I HMGN4 LINC00240 LOC100270746 LOC285819 MIR3143 PRSS16 ZNF322
rs145076523	chr6:32115185	A	1.00 (0.94-1.06)	0.90 (0.87-0.92)	0.91 (0.89-0.94)	0.9952	3.429e-15	5.005e-13	chr6:31121945..32205942	ABHD16A AGER AGPAT1 AIF1 APOM ATF6B ATP6V1G2 ATP6V1G2-DDX39B BAG6 C2 C2-AS1 C4A C4B C4B_2 C6orf25 C6orf47 C6orf48 CCHCR1 CFB CLIC1 CSNK2B CYP21A1P CYP21A2 DDAH2 DDX39B DXO EGFL8 EHMT2 FKBPL GPANK1 GPSM3 HCG26 HCG27 HCP5 HLA-B HLA-C HSPA1A HSPA1B HSPA1L LOC100507547 LSM2 LST1 LTA LTB LY6G5B LY6G5C LY6G6C LY6G6D LY6G6E LY6G6F MCCD1 MICA MICB MIR1236 MIR4646 MIR6721 MIR6832 MIR6833 MIR6891 MSH5 MSH5…
rs144304366	chr6:29903993	T	1.08 (1.00-1.16)	1.12 (1.09-1.16)	1.11 (1.08-1.15)	0.03821	2.918e-12	5.206e-13	chr6:29646165..30056476	HCG4 HCG4B HCG8 HCG9 HLA-A HLA-F HLA-F-AS1 HLA-G HLA-H HLA-J IFITM4P LOC554223 PPP1R11 RNF39 ZNRD1 ZNRD1-AS1
rs55661361	chr11:124613957	A	0.95 (0.90-1.00)	0.92 (0.90-0.95)	0.93 (0.91-0.95)	0.03121	3.678e-12	5.362e-13	chr11:124585592..124681383	ESAM LOC100507283 LOC101929340 MSANTD2 NRGN VSIG2
rs13218591	chr6:26376832	T	1.02 (0.96-1.07)	1.10 (1.07-1.12)	1.08 (1.06-1.10)	0.5465	2.021e-14	6.048e-13	chr6:26342749..26496916	BTN2A1 BTN2A2 BTN2A3P BTN3A1 BTN3A2 BTN3A3 LOC285819
rs144660248	chr6:32551703	T	0.97 (0.87-1.08)	0.82 (0.78-0.87)	0.85 (0.81-0.89)	0.5593	1.888e-14	6.187e-13	chr6:32428862..32551703	HLA-DRB1 HLA-DRB5 HLA-DRB6
rs114455101	chr6:32433630	T	0.98 (0.89-1.07)	1.19 (1.14-1.24)	1.15 (1.11-1.20)	0.6116	6.067e-16	6.368e-13	chr6:32433607..32435983	NONE
rs185717927	chr6:32536501	C	0.98 (0.86-1.12)	1.30 (1.22-1.38)	1.23 (1.16-1.31)	0.7704	7.629e-16	7.336e-13	chr6:32536501..32536501	NONE
rs11682175	chr2:57987593	T	0.96 (0.91-1.00)	0.93 (0.91-0.95)	0.93 (0.92-0.95)	0.07856	2.543e-12	1.138e-12	chr2:57917222..58482646	FANCL VRK2
rs142972412	chr6:32454837	T	1.03 (0.97-1.09)	1.10 (1.08-1.13)	1.09 (1.06-1.12)	0.4017	1.075e-13	1.246e-12	chr6:32454744..32602790	HLA-DRB1 HLA-DRB5 HLA-DRB6
rs138748649	chr6:32210259	T	1.04 (0.97-1.12)	1.13 (1.09-1.17)	1.12 (1.08-1.15)	0.2909	3.1e-13	1.335e-12	chr6:32210259..32210259	NONE
rs144649399	chr6:29117852	A	0.99 (0.92-1.06)	0.88 (0.86-0.91)	0.90 (0.87-0.93)	0.7503	2.691e-14	1.467e-12	chr6:28580121..29340617	HCG14 LINC01556 LINC01623 LOC100129636 OR14J1 OR2B3 OR2J2 OR2J3 OR2W1 OR5V1 TRIM27 ZNF311
rs114086406	chr6:32342537	A	1.00 (0.94-1.07)	0.89 (0.86-0.91)	0.90 (0.88-0.93)	0.9005	5.194e-15	1.478e-12	chr6:32340176..32591141	BTNL2 HCG23 HLA-DRA HLA-DRB1 HLA-DRB5 HLA-DRB6
rs114950038	chr6:29950833	C	0.94 (0.89-1.00)	0.90 (0.88-0.93)	0.91 (0.89-0.93)	0.06726	3.197e-12	1.516e-12	chr6:29690056..30073195	HCG4 HCG4B HCG8 HCG9 HLA-A HLA-F HLA-F-AS1 HLA-G HLA-H HLA-J IFITM4P LOC554223 PPP1R11 RNF39 TRIM31 TRIM31-AS1 ZNRD1 ZNRD1-AS1
rs12887734	chr14:104046834	T	1.02 (0.96-1.07)	1.09 (1.07-1.12)	1.08 (1.06-1.10)	0.5375	1.172e-13	1.558e-12	chr14:103849715..104361681	APOPT1 BAG5 CKB KLC1 LINC00637 MARK3 PPP1R13B TRMT61A XRCC3 ZFYVE21
rs186129480	chr6:32595383	T	1.03 (0.97-1.10)	1.12 (1.08-1.15)	1.10 (1.07-1.13)	0.3836	1.958e-13	1.616e-12	chr6:32458131..32609097	HLA-DQA1 HLA-DRB1 HLA-DRB5 HLA-DRB6
rs115052633	chr6:31589264	C	0.98 (0.92-1.05)	1.12 (1.09-1.16)	1.10 (1.07-1.13)	0.5949	1.997e-15	1.65e-12	chr6:31582025..32549563	ABHD16A AGER AGPAT1 AIF1 APOM ATF6B BAG6 BTNL2 C2 C2-AS1 C4A C4B C4B_2 C6orf10 C6orf25 C6orf47 C6orf48 CFB CLIC1 CSNK2B CYP21A1P CYP21A2 DDAH2 DXO EGFL8 EHMT2 FKBPL GPANK1 GPSM3 HCG23 HLA-DRA HLA-DRB1 HLA-DRB5 HLA-DRB6 HSPA1A HSPA1B HSPA1L LOC100507547 LSM2 LY6G5B LY6G5C LY6G6C LY6G6D LY6G6E LY6G6F MIR1236 MIR4646 MIR6721 MIR6832 MIR6833 MSH5 MSH5-SAPCD1 NELFE NEU1 NOTCH4 PBX2 PPT2 PPT2-EGFL8 PRR…
rs4129585	chr8:143312933	A	1.02 (0.97-1.07)	1.08 (1.06-1.10)	1.07 (1.05-1.09)	0.426	2.028e-13	2.212e-12	chr8:143268630..143410423	LINC00051 TSNARE1
rs35225200	chr4:103146888	A	0.95 (0.87-1.03)	0.87 (0.83-0.90)	0.88 (0.85-0.91)	0.215	9.562e-13	2.312e-12	chr4:102707791..103385407	BANK1 SLC39A8
rs140865314	chr6:32153406	A	1.01 (0.94-1.08)	0.89 (0.87-0.92)	0.91 (0.89-0.93)	0.8241	6.149e-15	2.345e-12	chr6:32153406..32577633	BTNL2 C6orf10 GPSM3 HCG23 HLA-DRA HLA-DRB1 HLA-DRB5 HLA-DRB6 NOTCH4 PBX2
rs2507989	chr6:31324415	A	0.99 (0.92-1.06)	1.13 (1.10-1.17)	1.11 (1.08-1.14)	0.708	4.935e-15	2.37e-12	chr6:30764907..31482097	C6orf15 CCHCR1 CDSN DDR1 DPCR1 GTF2H4 HCG22 HCG26 HCG27 HCP5 HLA-B HLA-C LINC00243 MICA MICB MIR4640 MIR6891 MUC21 MUC22 POU5F1 PSORS1C1 PSORS1C2 PSORS1C3 SFTA2 TCF19 VARS2
rs36057735	chr6:31319923	C	1.03 (0.96-1.10)	1.12 (1.08-1.15)	1.10 (1.07-1.13)	0.4378	2.285e-13	2.41e-12	chr6:31016550..31451848	C6orf15 CCHCR1 CDSN HCG22 HCG26 HCG27 HCP5 HLA-B HLA-C MICA MIR6891 POU5F1 PSORS1C1 PSORS1C2 PSORS1C3 TCF19
rs144018888	chr6:29750992	T	1.03 (0.96-1.11)	1.13 (1.10-1.17)	1.11 (1.08-1.15)	0.3892	2.494e-13	2.544e-12	chr6:29734184..30065149	HCG4 HCG4B HCG8 HCG9 HLA-A HLA-G HLA-H HLA-J LOC554223 PPP1R11 RNF39 ZNRD1 ZNRD1-AS1
rs3617	chr3:52833805	A	0.94 (0.90-0.99)	0.93 (0.91-0.95)	0.93 (0.92-0.95)	0.01118	6.374e-11	3.082e-12	chr3:52252969..53101780	BAP1 DNAH1 GLT8D1 GLYCTK GLYCTK-AS1 GNL3 ITIH1 ITIH3 ITIH4 ITIH4-AS1 MIR135A1 MIR8064 MIRLET7G MUSTN1 NEK4 NISCH NT5DC2 PBRM1 PHF7 PPM1M SEMA3G SFMBT1 SMIM4 SNORD136 SNORD19 SNORD19B SNORD69 SPCS1 STAB1 TLR9 TMEM110 TMEM110-MUSTN1 TNNC1 TWF2 WDR82
rs114274203	chr6:31268620	T	1.08 (1.03-1.14)	1.08 (1.05-1.10)	1.08 (1.06-1.10)	0.002538	4.07e-10	3.437e-12	chr6:31122500..31328542	CCHCR1 HCG27 HLA-B HLA-C MIR6891 POU5F1 PSORS1C3 TCF19
rs115937317	chr6:29355202	C	1.02 (0.96-1.08)	1.11 (1.08-1.14)	1.09 (1.07-1.12)	0.5175	1.413e-13	3.461e-12	chr6:29227117..29356587	OR12D3 OR14J1 OR5V1
rs281768	chr2:200825240	A	1.00 (0.94-1.06)	1.11 (1.08-1.13)	1.09 (1.06-1.11)	0.9455	3.468e-14	3.486e-12	chr2:200647533..201226862	C2orf47 C2orf69 FTCDNL1 SPATS2L TYW5
rs180778602	chr6:32502399	T	1.01 (0.92-1.10)	0.85 (0.81-0.88)	0.87 (0.84-0.91)	0.9127	1.24e-14	3.568e-12	chr6:32029205..32776921	AGER AGPAT1 ATF6B BTNL2 C6orf10 EGFL8 FKBPL GPSM3 HCG23 HLA-DQA1 HLA-DQA2 HLA-DQB1 HLA-DQB2 HLA-DRA HLA-DRB1 HLA-DRB5 HLA-DRB6 LOC100507547 MIR3135B MIR6721 MIR6833 NOTCH4 PBX2 PPT2 PPT2-EGFL8 PRRT1 RNF5 RNF5P1 TNXB
rs707939	chr6:31726688	A	1.03 (0.98-1.08)	1.08 (1.06-1.10)	1.07 (1.05-1.09)	0.191	2.058e-12	4.42e-12	chr6:31572956..32070069	ABHD16A AIF1 APOM BAG6 C2 C2-AS1 C4A C4B C4B_2 C6orf25 C6orf47 C6orf48 CFB CLIC1 CSNK2B CYP21A1P CYP21A2 DDAH2 DXO EHMT2 GPANK1 HSPA1A HSPA1B HSPA1L LSM2 LY6G5B LY6G5C LY6G6C LY6G6D LY6G6E LY6G6F MIR1236 MIR4646 MIR6832 MSH5 MSH5-SAPCD1 NELFE NEU1 PRRC2A SAPCD1 SAPCD1-AS1 SKIV2L SLC44A4 SNORA38 SNORD48 SNORD52 STK19 TNXA TNXB VARS VWA7 ZBTB12
rs186229361	chr6:32435955	T	1.00 (0.91-1.10)	1.19 (1.14-1.25)	1.15 (1.11-1.20)	0.9963	1.688e-14	5.252e-12	chr6:32433607..32436185	NONE
rs9461856	chr6:33395199	A	1.03 (0.99-1.08)	1.08 (1.05-1.10)	1.07 (1.05-1.09)	0.1593	5.36e-12	5.607e-12	chr6:33250476..33564296	BAK1 CUTA DAXX GGNBP1 KIFC1 LINC00336 MIR1234 MIR5004 MIR6834 MIR6873 PFDN6 PHF1 RGL2 SYNGAP1 TAPBP WDR46 ZBTB22 ZBTB9
rs113397282	chr6:32488050	T	0.98 (0.91-1.05)	1.15 (1.11-1.18)	1.11 (1.08-1.15)	0.513	2.261e-15	5.72e-12	chr6:32485879..32488081	HLA-DRB5
rs113205291	chr6:29862621	A	1.07 (1.00-1.15)	1.12 (1.08-1.15)	1.11 (1.08-1.14)	0.04817	2.676e-11	6.915e-12	chr6:29335154..30321732	GABBR1 HCG17 HCG18 HCG4 HCG4B HCG8 HCG9 HLA-A HLA-F HLA-F-AS1 HLA-G HLA-H HLA-J HLA-L IFITM4P LINC01015 LOC554223 MAS1L MIR6891 MOG OR10C1 OR11A1 OR12D2 OR12D3 OR2H1 OR2H2 PPP1R11 RNF39 RPP21 SNORD32B TRIM10 TRIM15 TRIM26 TRIM31 TRIM31-AS1 TRIM39 TRIM39-RPP21 TRIM40 UBD ZFP57 ZNRD1 ZNRD1-AS1
rs2851447	chr12:123665113	C	1.01 (0.96-1.06)	0.91 (0.89-0.93)	0.93 (0.91-0.95)	0.7768	2.189e-14	7.619e-12	chr12:123409694..123909485	ABCB9 ARL6IP4 C12orf65 CDK2AP1 KMT5A LOC100507091 MIR4304 MIR8072 MPHOSPH9 OGFOD2 PITPNM2 RILPL2 SBNO1
rs142790902	chr6:32549914	T	1.01 (0.88-1.15)	1.28 (1.20-1.36)	1.22 (1.15-1.29)	0.937	4.978e-14	9.557e-12	chr6:32549914..32549914	HLA-DRB1
rs115960997	chr6:29902109	A	0.93 (0.87-1.00)	0.90 (0.87-0.93)	0.91 (0.88-0.93)	0.04058	5.261e-11	9.856e-12	chr6:29782633..30056476	HCG4B HCG8 HCG9 HLA-A HLA-G HLA-H HLA-J PPP1R11 RNF39 ZNRD1 ZNRD1-AS1
rs1793889	chr6:31222181	A	0.93 (0.88-0.99)	0.92 (0.89-0.94)	0.92 (0.90-0.94)	0.01421	2.015e-10	9.976e-12	chr6:31081205..31319620	CCHCR1 CDSN HCG27 HLA-C POU5F1 PSORS1C1 PSORS1C2 PSORS1C3 TCF19
rs75968099	chr3:36858583	T	1.03 (0.98-1.08)	1.08 (1.06-1.11)	1.07 (1.05-1.09)	0.3025	3.386e-12	1.039e-11	chr3:36843149..37326663	EPM2AIP1 GOLGA4 LRRFIP2 MLH1 TRANK1
rs144532965	chr6:32489795	A	0.98 (0.91-1.05)	0.89 (0.86-0.92)	0.90 (0.88-0.93)	0.5443	6.959e-13	1.045e-11	chr6:32489795..32559753	HLA-DRB1 HLA-DRB5 HLA-DRB6
rs111312615	chr6:29923079	T	1.07 (0.99-1.15)	1.13 (1.09-1.17)	1.12 (1.08-1.15)	0.0894	2.209e-11	1.131e-11	chr6:29768917..30070346	HCG4B HCG8 HCG9 HLA-A HLA-G HLA-H HLA-J PPP1R11 RNF39 ZNRD1 ZNRD1-AS1
rs115661163	chr6:29337075	T	1.02 (0.96-1.08)	1.11 (1.08-1.14)	1.09 (1.06-1.12)	0.5983	5.134e-13	1.17e-11	chr6:28601301..29355113	HCG14 LINC01556 LINC01623 LOC100129636 OR12D3 OR14J1 OR2B3 OR2J2 OR2J3 OR2W1 OR5V1 TRIM27 ZNF311
rs193267147	chr6:32496560	A	0.99 (0.87-1.13)	0.79 (0.74-0.84)	0.82 (0.78-0.87)	0.8845	1.672e-13	1.554e-11	chr6:32496560..32496560	HLA-DRB5
rs140364877	chr7:1885178	T	0.91 (0.86-0.97)	0.92 (0.90-0.95)	0.92 (0.90-0.94)	0.003498	1.372e-09	1.638e-11	chr7:1858991..2120758	MAD1L1 MIR4655
rs13240464	chr7:110898915	T	1.01 (0.96-1.06)	1.08 (1.06-1.11)	1.07 (1.05-1.09)	0.7093	6.162e-13	1.971e-11	chr7:110575133..111262370	IMMP2L LRRN3
rs41293179	chr6:32549878	T	0.98 (0.91-1.05)	0.89 (0.86-0.92)	0.90 (0.88-0.93)	0.5575	1.308e-12	2.336e-11	chr6:32487229..32565648	HLA-DRB1 HLA-DRB5 HLA-DRB6
rs34787248	chr6:28197886	T	0.97 (0.91-1.03)	0.91 (0.88-0.93)	0.92 (0.89-0.94)	0.3754	4.532e-12	2.423e-11	chr6:27779506..28331252	HIST1H1B HIST1H2AJ HIST1H2AK HIST1H2AL HIST1H2AM HIST1H2BM HIST1H2BN HIST1H2BO HIST1H3I HIST1H3J HIST1H4J HIST1H4K HIST1H4L NKAPL OR2B2 OR2B6 PGBD1 TOB2P1 ZKSCAN3 ZKSCAN4 ZKSCAN8 ZNF165 ZNF192P1 ZSCAN12P1 ZSCAN16 ZSCAN16-AS1 ZSCAN26 ZSCAN31 ZSCAN9
rs200986	chr6:27824766	C	0.97 (0.91-1.04)	0.90 (0.87-0.93)	0.91 (0.89-0.94)	0.3686	4.41e-12	2.463e-11	chr6:27498217..28219270	HIST1H1B HIST1H2AI HIST1H2AJ HIST1H2AK HIST1H2AL HIST1H2AM HIST1H2BL HIST1H2BM HIST1H2BN HIST1H2BO HIST1H3H HIST1H3I HIST1H3J HIST1H4J HIST1H4K HIST1H4L LINC01012 LOC100131289 OR2B2 OR2B6 TOB2P1 ZKSCAN4 ZKSCAN8 ZNF165 ZNF192P1 ZSCAN12P1 ZSCAN16 ZSCAN16-AS1 ZSCAN9
rs182908437	chr6:32510202	A	0.98 (0.89-1.08)	0.85 (0.81-0.89)	0.87 (0.83-0.91)	0.6998	6.931e-13	2.503e-11	chr6:32500957..32510202	NONE
rs191843781	chr6:32492967	T	0.93 (0.85-1.03)	1.18 (1.13-1.23)	1.14 (1.09-1.18)	0.1509	3.023e-15	2.678e-11	chr6:32492967..32492971	HLA-DRB5
rs4713071	chr6:27187919	A	0.98 (0.92-1.05)	1.12 (1.09-1.15)	1.09 (1.07-1.12)	0.5775	4.033e-14	3.103e-11	chr6:27185792..27187919	NONE
rs149721896	chr6:32378503	A	1.00 (0.93-1.08)	0.88 (0.85-0.91)	0.90 (0.88-0.93)	0.997	3.35e-13	3.235e-11	chr6:32218120..32666526	BTNL2 C6orf10 HCG23 HLA-DQA1 HLA-DQB1 HLA-DRA HLA-DRB1 HLA-DRB5 HLA-DRB6
rs6434928	chr2:198304577	A	0.97 (0.92-1.02)	0.93 (0.91-0.95)	0.93 (0.92-0.95)	0.2322	1.478e-11	3.239e-11	chr2:198144002..198952637	ANKRD44 ANKRD44-IT1 BOLL COQ10B HSPD1 HSPE1 HSPE1-MOB4 MARS2 MOB4 PLCL1 RFTN2 SF3B1 SNORA105A SNORA105B
rs116182620	chr6:32479521	A	1.05 (0.94-1.18)	1.22 (1.16-1.29)	1.19 (1.13-1.25)	0.4112	2.678e-12	3.446e-11	chr6:32479521..32479544	NONE
rs11753207	chr6:32552448	A	1.00 (0.94-1.07)	1.12 (1.09-1.15)	1.10 (1.07-1.13)	0.9409	4.179e-13	3.456e-11	chr6:32414273..32603098	HLA-DRB1 HLA-DRB5 HLA-DRB6
rs116254153	chr6:32339647	T	1.02 (0.95-1.09)	1.13 (1.09-1.17)	1.11 (1.07-1.14)	0.6074	1.289e-12	3.502e-11	chr6:32339647..32339647	C6orf10
rs142601889	chr6:32196575	T	1.01 (0.94-1.07)	1.12 (1.08-1.15)	1.10 (1.07-1.13)	0.8597	7.086e-13	3.733e-11	chr6:32196575..32196575	NONE
rs2760981	chr6:32565465	A	0.97 (0.92-1.02)	0.93 (0.91-0.95)	0.93 (0.91-0.95)	0.2328	2.209e-11	4.017e-11	chr6:32206103..32626139	BTNL2 C6orf10 HCG23 HLA-DQA1 HLA-DRA HLA-DRB1 HLA-DRB5 HLA-DRB6
rs147976543	chr6:32534644	A	1.00 (0.93-1.07)	1.12 (1.09-1.16)	1.10 (1.07-1.13)	0.9909	4.619e-13	4.37e-11	chr6:32501256..32595874	HLA-DRB1 HLA-DRB6
rs116067082	chr6:31190538	A	1.02 (0.97-1.08)	1.09 (1.06-1.11)	1.07 (1.05-1.10)	0.3568	9.595e-12	4.499e-11	chr6:30999102..31255762	C6orf15 CCHCR1 CDSN HCG22 HCG27 HLA-C MUC22 POU5F1 PSORS1C1 PSORS1C2 PSORS1C3 TCF19
rs114204022	chr6:29940679	A	0.92 (0.87-0.98)	0.91 (0.88-0.94)	0.91 (0.89-0.94)	0.01359	9.838e-10	4.61e-11	chr6:29643877..30056476	HCG4 HCG4B HCG8 HCG9 HLA-A HLA-F HLA-F-AS1 HLA-G HLA-H HLA-J IFITM4P LOC554223 PPP1R11 RNF39 ZFP57 ZNRD1 ZNRD1-AS1
rs41563	chr7:104852654	A	1.08 (1.03-1.13)	1.07 (1.04-1.09)	1.07 (1.05-1.09)	0.002521	5.439e-09	4.78e-11	chr7:104579054..105074302	KMT2E KMT2E-AS1 LINC01004 SRPK2
rs115165987	chr6:32207181	A	0.98 (0.92-1.05)	0.90 (0.87-0.93)	0.91 (0.89-0.94)	0.5694	3.188e-12	4.922e-11	chr6:32191620..32299592	C6orf10 NOTCH4
rs9636107	chr18:53200117	A	1.00 (0.95-1.04)	0.93 (0.91-0.95)	0.94 (0.92-0.96)	0.8453	9.091e-13	5.292e-11	chr18:53149021..53463661	TCF4 TCF4-AS1
rs764284	chr6:27312078	A	1.03 (0.98-1.08)	1.07 (1.05-1.10)	1.07 (1.05-1.09)	0.2272	3.272e-11	5.908e-11	chr6:27307817..27525126	ZNF184 ZNF204P ZNF391
rs35828350	chr15:85355841	A	0.93 (0.88-0.98)	0.93 (0.90-0.95)	0.93 (0.90-0.95)	0.008252	1.969e-09	6.017e-11	chr15:84375147..85433458	ADAMTSL3 ALPK3 DNM1P41 EFTUD1P1 GOLGA2P7 GOLGA6L4 GOLGA6L5P LINC00933 LOC102724034 LOC103171574 LOC440300 LOC642423 NMB SCAND2P SEC11A SLC28A1 UBE2Q2L UBE2Q2P1 WDR73 ZNF592 ZSCAN2
rs115325719	chr6:32930795	T	0.98 (0.90-1.06)	1.16 (1.11-1.20)	1.12 (1.08-1.16)	0.5892	5.654e-14	6.262e-11	chr6:32913246..33088214	BRD2 HLA-DMA HLA-DOA HLA-DPA1 HLA-DPB1 HLA-DPB2
rs17843707	chr6:32622382	T	0.96 (0.88-1.05)	1.18 (1.13-1.24)	1.14 (1.09-1.18)	0.3639	7.809e-15	6.653e-11	chr6:32622182..32633426	HLA-DQB1
rs149915948	chr6:30607500	T	0.95 (0.88-1.01)	0.90 (0.87-0.93)	0.91 (0.88-0.93)	0.112	1.074e-10	6.917e-11	chr6:29988642..30658239	ABCF1 ATAT1 C6orf136 DHX16 GNL1 HCG17 HCG18 HLA-E HLA-L MIR6891 MIR877 MRPS18B NRM PPP1R10 PPP1R11 PPP1R18 PRR3 RNF39 RPP21 TRIM10 TRIM15 TRIM26 TRIM31 TRIM31-AS1 TRIM39 TRIM39-RPP21 TRIM40 ZNRD1 ZNRD1-AS1
rs1150688	chr6:28162780	T	1.04 (0.99-1.09)	1.08 (1.05-1.10)	1.07 (1.05-1.09)	0.1578	6.608e-11	7.626e-11	chr6:27267008..29161435	GPX5 GPX6 HCG14 HIST1H1B HIST1H2AI HIST1H2AJ HIST1H2AK HIST1H2AL HIST1H2AM HIST1H2BL HIST1H2BM HIST1H2BN HIST1H2BO HIST1H3H HIST1H3I HIST1H3J HIST1H4J HIST1H4K HIST1H4L LINC01012 LINC01556 LINC01623 LOC100129636 LOC100131289 NKAPL OR2B2 OR2B3 OR2B6 OR2J2 OR2J3 OR2W1 PGBD1 POM121L2 TOB2P1 TRIM27 VN1R10P ZBED9 ZKSCAN3 ZKSCAN4 ZKSCAN8 ZNF165 ZNF184 ZNF192P1 ZNF204P ZNF311 ZNF391 ZSCAN12 ZSCAN12P1 ZS…
rs189600472	chr6:32494097	T	0.99 (0.91-1.08)	1.15 (1.11-1.20)	1.12 (1.08-1.16)	0.8817	4.904e-13	7.875e-11	chr6:32494097..32494097	HLA-DRB5
rs145501595	chr6:29412968	A	0.93 (0.87-0.99)	0.91 (0.89-0.94)	0.92 (0.89-0.94)	0.02972	1.009e-09	9.816e-11	chr6:29408528..29486303	MAS1L OR10C1 OR2H1
rs4642619	chr8:111487468	A	1.04 (0.98-1.10)	1.09 (1.06-1.12)	1.08 (1.06-1.11)	0.1689	1.053e-10	9.846e-11	chr8:111418573..111683718	NONE
rs149787317	chr6:32599655	T	1.02 (0.96-1.09)	1.10 (1.07-1.14)	1.09 (1.06-1.12)	0.4635	1.646e-11	1.15e-10	chr6:32459595..32603098	HLA-DRB1 HLA-DRB5 HLA-DRB6
rs4702	chr15:91426560	A	1.00 (0.95-1.05)	0.92 (0.90-0.95)	0.94 (0.92-0.96)	0.914	2.298e-12	1.221e-10	chr15:91395480..91429042	FES FURIN
rs12704290	chr7:86427626	A	0.95 (0.89-1.03)	0.90 (0.87-0.93)	0.91 (0.88-0.93)	0.2209	1.037e-10	1.415e-10	chr7:86199080..86580674	GRM3 KIAA1324L
rs117616320	chr6:32494704	A	0.98 (0.92-1.05)	0.90 (0.87-0.93)	0.91 (0.89-0.94)	0.6091	9.288e-12	1.456e-10	chr6:32494704..32494704	HLA-DRB5
rs2176546	chr2:58156772	C	1.04 (0.99-1.09)	1.07 (1.05-1.10)	1.07 (1.05-1.09)	0.1598	1.836e-10	1.477e-10	chr2:57942325..58535064	FANCL VRK2
rs114838832	chr6:30905313	A	1.04 (0.98-1.10)	1.10 (1.07-1.13)	1.09 (1.06-1.11)	0.2355	7.165e-11	1.531e-10	chr6:30802017..30932309	DDR1 DPCR1 GTF2H4 MIR4640 SFTA2 VARS2
rs369637	chr6:32025863	T	0.99 (0.92-1.07)	0.90 (0.87-0.92)	0.91 (0.89-0.94)	0.8311	5.644e-12	1.817e-10	chr6:31044463..32844103	ABHD16A AGER AGPAT1 AIF1 APOM ATF6B ATP6V1G2 ATP6V1G2-DDX39B BAG6 BTNL2 C2 C2-AS1 C4A C4B C4B_2 C6orf10 C6orf15 C6orf25 C6orf47 C6orf48 CCHCR1 CDSN CFB CLIC1 CSNK2B CYP21A1P CYP21A2 DDAH2 DDX39B DXO EGFL8 EHMT2 FKBPL GPANK1 GPSM3 HCG23 HCG26 HCG27 HCP5 HLA-B HLA-C HLA-DOB HLA-DQA1 HLA-DQA2 HLA-DQB1 HLA-DQB2 HLA-DRA HLA-DRB1 HLA-DRB5 HLA-DRB6 HSPA1A HSPA1B HSPA1L LOC100507547 LSM2 LST1 LTA LTB LY6…
rs116460775	chr6:32211085	T	1.01 (0.96-1.07)	1.10 (1.07-1.13)	1.08 (1.06-1.11)	0.6297	1.01e-11	1.854e-10	chr6:32184705..32576114	BTNL2 C6orf10 HCG23 HLA-DRA HLA-DRB1 HLA-DRB5 HLA-DRB6 NOTCH4
rs114291394	chr6:31351522	A	0.96 (0.91-1.02)	0.92 (0.90-0.95)	0.93 (0.91-0.95)	0.1757	2.471e-10	2.09e-10	chr6:31276447..31373260	HLA-B MICA MIR6891
rs11740474	chr5:153680747	A	0.92 (0.88-0.97)	0.94 (0.92-0.96)	0.94 (0.92-0.96)	0.001194	3.936e-08	2.194e-10	chr5:153497584..153699515	GALNT10
rs12925872	chr16:13752356	T	1.04 (0.99-1.10)	1.08 (1.06-1.11)	1.08 (1.05-1.10)	0.1197	4.328e-10	2.247e-10	chr16:13654982..13808306	NONE
rs6704768	chr2:233592501	A	1.00 (0.96-1.05)	0.93 (0.91-0.95)	0.94 (0.92-0.96)	0.9261	3.148e-12	2.66e-10	chr2:233553512..233768788	C2orf82 GIGYF2 KCNJ13 NGEF
rs7801375	chr7:131567263	A	0.91 (0.86-0.97)	0.92 (0.89-0.95)	0.92 (0.89-0.94)	0.003554	2.261e-08	2.706e-10	chr7:131522963..131619847	LOC101928782
rs147875011	chr6:32636613	T	0.97 (0.92-1.03)	1.10 (1.07-1.13)	1.08 (1.05-1.10)	0.3011	1.218e-13	2.709e-10	chr6:32591476..32637778	HLA-DQA1 HLA-DQB1
rs4580973	chr7:104903659	A	1.09 (1.04-1.15)	1.06 (1.04-1.08)	1.06 (1.04-1.09)	0.0002364	1.34e-07	3.005e-10	chr7:104524092..105087973	KMT2E KMT2E-AS1 LHFPL3 LHFPL3-AS2 LINC01004 SRPK2
rs7893279	chr10:18745105	T	1.03 (0.95-1.10)	1.12 (1.08-1.16)	1.10 (1.07-1.14)	0.5104	3.562e-11	3.075e-10	chr10:18661160..18995964	ARL5B CACNB2 NSUN6
rs114508985	chr6:32900018	C	0.96 (0.91-1.02)	0.92 (0.89-0.94)	0.93 (0.90-0.95)	0.2038	2.778e-10	3.335e-10	chr6:32900018..32900018	NONE
rs114812317	chr6:32499274	A	1.02 (0.93-1.12)	0.86 (0.82-0.89)	0.88 (0.85-0.92)	0.7083	1.575e-12	3.347e-10	chr6:32480419..32535172	HLA-DRB5 HLA-DRB6
rs9469174	chr6:32524918	A	0.98 (0.92-1.05)	0.90 (0.87-0.93)	0.91 (0.89-0.94)	0.6169	2.21e-11	3.369e-10	chr6:32454783..32596908	HLA-DRB1 HLA-DRB5 HLA-DRB6
rs12826178	chr12:57622371	T	1.01 (0.91-1.13)	0.85 (0.81-0.89)	0.87 (0.83-0.91)	0.8604	5.297e-12	3.872e-10	chr12:57569478..57682956	LRP1 MIR1228 NDUFA4L2 NXPH4 R3HDM2 SHMT2 STAC3
rs8054556	chr16:29958216	A	0.97 (0.93-1.02)	0.93 (0.92-0.95)	0.94 (0.92-0.96)	0.2695	2.336e-10	3.881e-10	chr16:29908777..30147265	ALDOA ASPHD1 C16orf92 DOC2A FAM57B GDPD3 HIRIP3 INO80E KCTD13 MAPK3 PPP4C SEZ6L2 TAOK2 TBX6 TMEM219 YPEL3
rs2237234	chr6:26391394	A	0.99 (0.94-1.05)	0.92 (0.90-0.94)	0.93 (0.91-0.95)	0.7605	2.214e-11	4.088e-10	chr6:26343057..26496916	BTN2A1 BTN2A2 BTN2A3P BTN3A1 BTN3A2 BTN3A3 LOC285819
rs11210892	chr1:44100084	A	0.97 (0.92-1.01)	0.93 (0.91-0.95)	0.94 (0.92-0.96)	0.1448	4.97e-10	4.15e-10	chr1:43999327..44480093	ARTN ATP6V0B B4GALT2 CCDC24 DPH2 IPO13 KDM4A KDM4A-AS1 LOC101929592 MIR6079 PTPRF SLC6A9 ST3GAL3
rs67756423	chr8:143333525	A	1.04 (0.99-1.10)	1.08 (1.06-1.11)	1.08 (1.05-1.10)	0.1484	6.632e-10	4.405e-10	chr8:143310815..143376802	TSNARE1
rs8042374	chr15:78908032	A	0.99 (0.94-1.04)	1.09 (1.07-1.12)	1.07 (1.05-1.10)	0.6963	1.865e-12	4.771e-10	chr15:78714561..79065380	ADAMTS7 CHRNA3 CHRNA5 CHRNB4 HYKK IREB2 LOC646938 PSMA4
rs145470632	chr6:32493246	A	1.03 (0.95-1.12)	1.14 (1.09-1.18)	1.12 (1.08-1.16)	0.4889	6.264e-11	4.827e-10	chr6:32493246..32493266	HLA-DRB5
rs114810457	chr6:32154285	A	1.00 (0.94-1.06)	1.10 (1.07-1.13)	1.08 (1.05-1.10)	0.9337	5.302e-12	4.894e-10	chr6:32109979..32190217	AGER AGPAT1 EGFL8 GPSM3 LOC100507547 MIR6721 MIR6833 NOTCH4 PBX2 PPT2 PPT2-EGFL8 PRRT1 RNF5 RNF5P1
rs17194490	chr3:2547786	T	1.02 (0.95-1.09)	1.10 (1.07-1.13)	1.09 (1.06-1.12)	0.5784	4.865e-11	5.092e-10	chr3:2427838..2590291	CNTN4
rs142520578	chr6:31861815	A	1.04 (0.99-1.09)	1.07 (1.05-1.10)	1.07 (1.05-1.09)	0.1483	7.838e-10	5.146e-10	chr6:31605976..31947460	ABHD16A APOM BAG6 C2 C2-AS1 C6orf25 C6orf47 C6orf48 CFB CLIC1 CSNK2B DDAH2 DXO EHMT2 GPANK1 HSPA1A HSPA1B HSPA1L LSM2 LY6G5B LY6G5C LY6G6C LY6G6D LY6G6E LY6G6F MIR1236 MIR4646 MSH5 MSH5-SAPCD1 NELFE NEU1 SAPCD1 SAPCD1-AS1 SKIV2L SLC44A4 SNORD48 SNORD52 STK19 VARS VWA7 ZBTB12
rs114771361	chr6:32674329	A	1.09 (1.03-1.15)	1.07 (1.04-1.10)	1.07 (1.05-1.10)	0.002121	6.342e-08	5.324e-10	chr6:32587352..32681992	HLA-DQA1 HLA-DQB1
rs1498232	chr1:30433951	T	1.04 (0.99-1.09)	1.07 (1.05-1.10)	1.07 (1.05-1.09)	0.1018	1.284e-09	5.371e-10	chr1:30405167..30511227	LOC101929406
rs115283957	chr6:31276435	C	1.06 (1.00-1.12)	1.08 (1.05-1.11)	1.08 (1.05-1.10)	0.06105	3.172e-09	5.96e-10	chr6:30997692..31333191	C6orf15 CCHCR1 CDSN HCG22 HCG27 HLA-B HLA-C MIR6891 MUC22 POU5F1 PSORS1C1 PSORS1C2 PSORS1C3 TCF19
rs3735025	chr7:137074844	T	1.06 (1.01-1.11)	1.07 (1.04-1.09)	1.06 (1.04-1.09)	0.02938	7.752e-09	6.465e-10	chr7:137030345..137093743	DGKI
rs4523957	chr17:2208899	T	1.04 (0.99-1.09)	1.07 (1.05-1.09)	1.07 (1.04-1.09)	0.1355	1.04e-09	6.74e-10	chr17:1984121..2253468	LOC101927839 SGSM2 SMG6 SNORD91A SNORD91B SRR TSR1
rs116593970	chr6:32709990	T	0.99 (0.94-1.05)	0.92 (0.89-0.94)	0.93 (0.91-0.95)	0.7478	3.244e-11	7.409e-10	chr6:32683112..32758394	HLA-DQA2 HLA-DQB2 MIR3135B
rs169738	chr6:33537546	A	0.98 (0.94-1.03)	0.93 (0.91-0.95)	0.94 (0.92-0.96)	0.4363	1.482e-10	7.719e-10	chr6:33343859..33546930	BAK1 CUTA KIFC1 MIR5004 PHF1 SYNGAP1 ZBTB9
rs7907645	chr10:104423800	T	1.02 (0.93-1.11)	1.14 (1.10-1.19)	1.12 (1.08-1.16)	0.7154	5.819e-11	8.874e-10	chr10:104220576..104536360	ACTR1A ARL3 MFSD13A SFXN2 SUFU TRIM8 WBP1L
rs12954356	chr18:53253410	C	0.97 (0.91-1.03)	0.91 (0.88-0.94)	0.92 (0.90-0.95)	0.3341	3.529e-10	9.426e-10	chr18:53175966..53477784	TCF4
rs2910032	chr5:152540354	T	0.96 (0.92-1.01)	0.94 (0.92-0.96)	0.94 (0.92-0.96)	0.1301	1.902e-09	9.576e-10	chr5:152509001..152721168	NONE
rs9270074	chr6:32554129	T	0.98 (0.92-1.04)	1.10 (1.07-1.13)	1.08 (1.05-1.11)	0.509	2.575e-12	9.805e-10	chr6:32553889..32561123	HLA-DRB1
rs116139966	chr6:32603656	C	0.97 (0.92-1.04)	1.11 (1.08-1.14)	1.08 (1.06-1.11)	0.4119	1.884e-12	1.044e-09	chr6:32509707..32636376	HLA-DQA1 HLA-DQB1 HLA-DRB1 HLA-DRB6
rs28724212	chr6:32556601	A	1.05 (0.95-1.17)	1.16 (1.11-1.22)	1.14 (1.09-1.19)	0.3298	4.379e-10	1.122e-09	chr6:32556601..32556601	HLA-DRB1
rs1899546	chr11:24398590	A	0.96 (0.91-1.00)	0.94 (0.92-0.96)	0.94 (0.93-0.96)	0.05321	6.089e-09	1.153e-09	chr11:24203101..24436022	NONE
rs72761442	chr5:60696323	A	1.02 (0.97-1.08)	1.09 (1.06-1.12)	1.08 (1.05-1.10)	0.4006	2.587e-10	1.162e-09	chr5:59964319..60847272	CTC-436P18.1 DEPDC1B ELOVL7 ERCC8 NDUFAF2 SMIM15 ZSWIM6
rs139547629	chr6:32485944	T	1.04 (0.97-1.12)	1.10 (1.07-1.14)	1.09 (1.06-1.12)	0.2547	7.564e-10	1.176e-09	chr6:32454783..32603098	HLA-DRB1 HLA-DRB5 HLA-DRB6
rs6071524	chr20:37426580	T	0.99 (0.94-1.04)	0.93 (0.91-0.95)	0.94 (0.92-0.96)	0.727	8.705e-11	1.178e-09	chr20:37360944..37498722	ACTR5 PPP1R16B
rs72934570	chr18:53533189	T	1.03 (0.94-1.13)	0.87 (0.83-0.90)	0.89 (0.86-0.92)	0.4836	3.667e-12	1.195e-09	chr18:53108005..53641028	LINC01416 MIR4529 TCF4 TCF4-AS1
rs11874716	chr18:52750688	T	1.00 (0.96-1.05)	1.07 (1.05-1.10)	1.06 (1.04-1.08)	0.907	4.128e-11	1.221e-09	chr18:52716730..52821124	LOC101927229
rs147793969	chr6:32493892	T	1.00 (0.92-1.08)	0.88 (0.85-0.92)	0.90 (0.87-0.93)	0.9937	3.007e-11	1.257e-09	chr6:32493892..32493892	HLA-DRB5
rs3132556	chr6:31078809	A	1.03 (0.97-1.09)	1.09 (1.06-1.12)	1.08 (1.05-1.11)	0.3465	3.661e-10	1.276e-09	chr6:30689001..31546850	ATP6V1G2 ATP6V1G2-DDX39B C6orf15 CCHCR1 CDSN DDR1 DDX39B DPCR1 FLOT1 GTF2H4 HCG22 HCG26 HCG27 HCP5 HLA-B HLA-C IER3 LINC00243 LTA MCCD1 MICA MICB MIR4640 MIR6891 MUC21 MUC22 NFKBIL1 POU5F1 PSORS1C1 PSORS1C2 PSORS1C3 SFTA2 SNORD117 SNORD84 TCF19 TNF TUBB VARS2
rs115487448	chr6:30993313	T	1.00 (0.93-1.07)	0.90 (0.87-0.93)	0.92 (0.89-0.94)	0.9347	3.912e-11	1.348e-09	chr6:30603519..31323506	ATAT1 C6orf136 C6orf15 CCHCR1 CDSN DDR1 DHX16 DPCR1 FLOT1 GTF2H4 HCG22 HCG27 HLA-B HLA-C IER3 LINC00243 MDC1 MDC1-AS1 MIR4640 MIR6891 MUC21 MUC22 NRM POU5F1 PPP1R18 PSORS1C1 PSORS1C2 PSORS1C3 SFTA2 TCF19 TUBB VARS2
rs6855246	chr4:103112470	A	0.94 (0.86-1.04)	0.86 (0.82-0.90)	0.88 (0.84-0.91)	0.2555	6.828e-10	1.39e-09	chr4:103112470..103112470	NONE
rs116047537	chr6:32381472	T	1.04 (0.98-1.11)	1.09 (1.06-1.12)	1.08 (1.05-1.11)	0.1957	1.191e-09	1.522e-09	chr6:32342822..32609806	BTNL2 HCG23 HLA-DQA1 HLA-DRA HLA-DRB1 HLA-DRB5 HLA-DRB6
rs7191183	chr16:9900057	T	0.95 (0.90-1.00)	0.94 (0.92-0.96)	0.94 (0.92-0.96)	0.04347	1.193e-08	1.546e-09	chr16:9875513..9997178	GRIN2A
rs77502336	chr11:123394636	C	1.03 (0.98-1.09)	1.07 (1.05-1.09)	1.06 (1.04-1.09)	0.1856	2.008e-09	1.68e-09	chr11:123346238..123395987	NONE
rs61789073	chr1:98404096	T	1.16 (1.04-1.28)	1.12 (1.07-1.16)	1.12 (1.08-1.17)	0.00545	7.977e-08	1.828e-09	chr1:98327133..98562260	DPYD MIR137 MIR137HG MIR2682
rs4391122	chr5:60598543	A	1.04 (0.99-1.09)	0.92 (0.90-0.94)	0.94 (0.93-0.96)	0.08381	1.734e-13	1.867e-09	chr5:59918840..60850522	CTC-436P18.1 DEPDC1B ELOVL7 ERCC8 NDUFAF2 SMIM15 ZSWIM6
rs1131275	chr6:31323960	C	1.06 (1.00-1.12)	1.07 (1.05-1.10)	1.07 (1.05-1.09)	0.04042	1.583e-08	1.881e-09	chr6:31237233..31390410	HLA-B HLA-C MICA MIR6891
rs11223651	chr11:133841034	T	1.01 (0.95-1.07)	0.92 (0.89-0.94)	0.93 (0.91-0.95)	0.7684	2.416e-11	1.894e-09	chr11:133801262..133853694	IGSF9B
rs3849046	chr5:137851192	T	1.04 (0.99-1.09)	1.06 (1.04-1.09)	1.06 (1.04-1.08)	0.1085	4.833e-09	1.933e-09	chr5:137775581..137948140	EGR1 ETF1 HSPA9 REEP2 SNORD63
rs62378245	chr5:88743962	T	0.94 (0.89-1.00)	0.93 (0.90-0.95)	0.93 (0.91-0.95)	0.04488	1.613e-08	2.101e-09	chr5:88615707..88764302	NONE
rs8009147	chr14:104264662	A	1.00 (0.95-1.05)	0.93 (0.91-0.95)	0.94 (0.92-0.96)	0.9487	3.904e-11	2.133e-09	chr14:104021141..104362673	APOPT1 BAG5 KLC1 LINC00637 PPP1R13B XRCC3 ZFYVE21
rs41293330	chr6:32542013	T	1.03 (0.97-1.10)	1.10 (1.07-1.14)	1.09 (1.06-1.12)	0.3285	8.416e-10	2.154e-09	chr6:32450515..32575746	HLA-DRB1 HLA-DRB5 HLA-DRB6
rs61747867	chr6:26272548	T	1.10 (1.03-1.17)	1.08 (1.05-1.11)	1.08 (1.05-1.11)	0.00375	1.314e-07	2.163e-09	chr6:26176517..26338538	HIST1H1D HIST1H2AD HIST1H2AE HIST1H2BE HIST1H2BF HIST1H2BG HIST1H2BH HIST1H2BI HIST1H3D HIST1H3E HIST1H3F HIST1H3G HIST1H4D HIST1H4E HIST1H4F HIST1H4G HIST1H4H
rs115915654	chr6:30769726	T	0.98 (0.92-1.05)	0.90 (0.87-0.93)	0.91 (0.89-0.94)	0.6236	1.705e-10	2.234e-09	chr6:30153363..31175946	ABCF1 ATAT1 C6orf136 C6orf15 CCHCR1 CDSN DDR1 DHX16 DPCR1 FLOT1 GNL1 GTF2H4 HCG17 HCG18 HCG22 HCG27 HLA-E HLA-L IER3 LINC00243 MDC1 MDC1-AS1 MIR4640 MIR6891 MIR877 MRPS18B MUC21 MUC22 NRM POU5F1 PPP1R10 PPP1R18 PRR3 PSORS1C1 PSORS1C2 PSORS1C3 RPP21 SFTA2 TCF19 TRIM26 TRIM39 TRIM39-RPP21 TUBB VARS2
rs2332700	chr14:72417326	C	1.03 (0.98-1.09)	1.08 (1.05-1.10)	1.07 (1.05-1.09)	0.2339	1.686e-09	2.273e-09	chr14:72394601..72450698	RGS6
rs2434529	chr5:153640046	A	0.93 (0.88-0.99)	0.93 (0.91-0.95)	0.93 (0.91-0.95)	0.01516	5.236e-08	2.551e-09	chr5:153555135..153690010	GALNT10
rs149998036	chr6:32438049	A	0.96 (0.88-1.04)	1.16 (1.11-1.21)	1.12 (1.08-1.16)	0.3411	1.381e-12	2.748e-09	chr6:32428804..32451944	NONE
rs115641444	chr6:32485062	C	1.03 (0.96-1.11)	1.11 (1.07-1.15)	1.10 (1.06-1.13)	0.4208	7.593e-10	2.825e-09	chr6:32458010..32492971	HLA-DRB5
rs184123737	chr6:32537642	T	1.01 (0.92-1.11)	1.15 (1.10-1.20)	1.13 (1.08-1.17)	0.8122	1.087e-10	3.032e-09	chr6:32537610..32537642	NONE
rs56223946	chr8:27413986	T	0.92 (0.85-0.99)	0.91 (0.88-0.94)	0.91 (0.88-0.94)	0.03009	3.738e-08	3.14e-09	chr8:27276705..27557405	CHRNA2 CLU EPHX2 MIR6842 MIR6843 PTK2B SCARA3
rs11210195	chr1:73749283	T	0.99 (0.94-1.03)	0.94 (0.92-0.96)	0.94 (0.93-0.96)	0.6	5.363e-10	3.56e-09	chr1:73281986..74139105	LINC01360
rs11641947	chr16:58669908	A	0.95 (0.89-1.01)	0.92 (0.89-0.95)	0.92 (0.90-0.95)	0.07952	1.2e-08	3.581e-09	chr16:58550484..58682833	CNOT1 SETD6 SNORA46 SNORA76A
rs3020736	chr22:42537127	A	0.96 (0.91-1.01)	0.93 (0.91-0.96)	0.94 (0.92-0.96)	0.1289	8.373e-09	3.784e-09	chr22:42344408..42684913	CYP2D6 CYP2D7 FAM109B LINC00634 LOC101929829 NAGA NDUFA6 NDUFA6-AS1 OGFRP1 SEPT3 SMDT1 TCF20 WBP2NL
rs5995756	chr22:40000313	T	0.99 (0.95-1.04)	1.07 (1.05-1.10)	1.06 (1.04-1.08)	0.7261	2.836e-11	3.966e-09	chr22:39944485..40089619	CACNA1I
rs12592967	chr15:61870943	T	1.02 (0.98-1.07)	1.07 (1.04-1.09)	1.06 (1.04-1.08)	0.3464	1.626e-09	4.049e-09	chr15:61813790..61909712	NONE
rs385492	chr6:29649547	T	1.03 (0.98-1.08)	1.06 (1.04-1.09)	1.06 (1.04-1.08)	0.213	4.262e-09	4.114e-09	chr6:29604124..30044388	HCG4 HCG4B HCG8 HCG9 HLA-A HLA-F HLA-F-AS1 HLA-G HLA-H HLA-J IFITM4P LOC554223 MOG PPP1R11 RNF39 ZFP57 ZNRD1 ZNRD1-AS1
rs57709857	chr8:38290424	A	0.92 (0.86-0.97)	0.93 (0.91-0.96)	0.93 (0.91-0.95)	0.004361	2.324e-07	4.146e-09	chr8:38014429..38316849	BAG4 DDHD2 FGFR1 LETM2 LSM1 PLPP5 WHSC1L1
rs115443066	chr6:32614360	A	1.00 (0.94-1.05)	1.10 (1.07-1.13)	1.08 (1.05-1.11)	0.8834	3.555e-11	4.184e-09	chr6:32603487..32636434	HLA-DQA1 HLA-DQB1
rs72687362	chr8:143358316	A	0.97 (0.92-1.03)	0.92 (0.90-0.95)	0.93 (0.91-0.95)	0.3286	1.889e-09	4.189e-09	chr8:143339888..143413334	TSNARE1
rs17659437	chr1:177306387	T	0.90 (0.84-0.96)	0.92 (0.90-0.95)	0.92 (0.89-0.95)	0.001185	7.27e-07	4.218e-09	chr1:177237533..177428790	BRINP2 LOC102724661
rs139099016	chr6:31329291	A	1.05 (0.99-1.12)	0.90 (0.87-0.93)	0.92 (0.90-0.95)	0.1122	8.223e-13	4.274e-09	chr6:31316526..31392906	HLA-B MICA MIR6891
rs116502302	chr6:30972865	A	1.06 (0.99-1.13)	1.09 (1.06-1.12)	1.08 (1.05-1.11)	0.07542	2.039e-08	4.815e-09	chr6:30933864..31175946	C6orf15 CCHCR1 CDSN HCG22 HCG27 MUC21 MUC22 POU5F1 PSORS1C1 PSORS1C2 PSORS1C3 TCF19
rs4309187	chr11:113412443	A	0.98 (0.93-1.03)	0.93 (0.91-0.95)	0.94 (0.92-0.96)	0.4772	8.426e-10	4.863e-09	chr11:113285916..113430486	DRD2 MIR4301
rs149544854	chr6:31722780	T	1.01 (0.96-1.06)	0.92 (0.90-0.95)	0.94 (0.92-0.96)	0.782	8.065e-11	5.359e-09	chr6:31580539..31820643	ABHD16A AIF1 APOM BAG6 C6orf25 C6orf47 C6orf48 CLIC1 CSNK2B DDAH2 GPANK1 HSPA1A HSPA1B HSPA1L LSM2 LY6G5B LY6G5C LY6G6C LY6G6D LY6G6E LY6G6F MIR4646 MIR6832 MSH5 MSH5-SAPCD1 PRRC2A SAPCD1 SAPCD1-AS1 SNORA38 SNORD48 SNORD52 VARS VWA7
rs9267057	chr6:31397390	T	0.94 (0.84-1.05)	0.84 (0.80-0.89)	0.86 (0.82-0.91)	0.2457	2.735e-09	5.363e-09	chr6:31397390..31397390	NONE
rs191269336	chr6:32489596	A	0.99 (0.92-1.06)	1.11 (1.08-1.15)	1.09 (1.06-1.12)	0.8091	8.27e-11	5.443e-09	chr6:32489596..32489734	HLA-DRB5
rs17292804	chr14:104205123	A	1.02 (0.95-1.11)	1.11 (1.07-1.15)	1.10 (1.06-1.13)	0.5453	1.051e-09	5.721e-09	chr14:103748844..104537680	APOPT1 BAG5 C14orf2 CKB EIF5 KLC1 LINC00637 MARK3 PPP1R13B RD3L SNORA28 TDRD9 TRMT61A XRCC3 ZFYVE21
rs59979824	chr2:193848340	A	0.96 (0.92-1.01)	0.94 (0.91-0.96)	0.94 (0.92-0.96)	0.1464	1.079e-08	5.957e-09	chr2:193656345..194329148	NONE
rs171748	chr5:60499131	A	0.98 (0.94-1.03)	1.07 (1.05-1.10)	1.06 (1.04-1.08)	0.4555	1.866e-11	6.195e-09	chr5:60069057..60574906	CTC-436P18.1 ELOVL7 ERCC8 NDUFAF2 SMIM15
rs139480376	chr6:32490246	A	1.00 (0.93-1.07)	1.11 (1.07-1.14)	1.09 (1.06-1.12)	0.9726	2.055e-10	6.269e-09	chr6:32490127..32561068	HLA-DRB1 HLA-DRB5 HLA-DRB6
rs1080500	chr3:53175017	A	0.98 (0.93-1.03)	0.93 (0.91-0.95)	0.94 (0.92-0.96)	0.4832	1.853e-09	6.465e-09	chr3:52536514..53175017	GLT8D1 GNL3 ITIH1 ITIH3 ITIH4 ITIH4-AS1 MIR8064 MUSTN1 NEK4 NT5DC2 PBRM1 RFT1 SFMBT1 SMIM4 SNORD136 SNORD19 SNORD19B SNORD69 SPCS1 STAB1 TMEM110 TMEM110-MUSTN1
rs191239160	chr6:32525992	C	0.97 (0.92-1.03)	0.92 (0.90-0.95)	0.93 (0.91-0.95)	0.3232	3.263e-09	6.663e-09	chr6:32478484..32581502	HLA-DRB1 HLA-DRB5 HLA-DRB6
rs301798	chr1:8488565	A	0.97 (0.92-1.02)	0.94 (0.91-0.96)	0.94 (0.92-0.96)	0.2584	5.33e-09	6.72e-09	chr1:8392395..8917212	LOC102724552 RERE SLC45A1 SNORD128
rs184538485	chr6:32490366	A	1.00 (0.94-1.06)	1.09 (1.06-1.12)	1.08 (1.05-1.10)	0.9685	2.379e-10	6.746e-09	chr6:32485491..32492781	HLA-DRB5
rs10211550	chr2:198383299	T	0.97 (0.92-1.02)	0.93 (0.91-0.96)	0.94 (0.92-0.96)	0.21	7.8e-09	6.831e-09	chr2:198200123..198954774	BOLL COQ10B HSPD1 HSPE1 HSPE1-MOB4 MARS2 MOB4 PLCL1 RFTN2 SF3B1 SNORA105A SNORA105B
rs4380187	chr2:185811940	A	0.99 (0.94-1.03)	1.07 (1.05-1.10)	1.06 (1.04-1.08)	0.5272	4.145e-11	7.44e-09	chr2:185455629..186102815	ZNF804A
rs9607782	chr22:41587556	A	0.97 (0.92-1.02)	1.09 (1.06-1.12)	1.07 (1.04-1.09)	0.2473	6.763e-12	8.642e-09	chr22:41074168..41853928	CHADL DNAJB7 EP300 EP300-AS1 L3MBTL2 MCHR1 MIR1281 MIR4766 MIR6889 RANGAP1 RBX1 SLC25A17 SNORD140 ST13 TEF TOB2 XPNPEP3 ZC3H7B
rs10520163	chr4:170626552	T	1.03 (0.98-1.08)	1.06 (1.04-1.09)	1.06 (1.04-1.08)	0.215	1.02e-08	8.725e-09	chr4:170205708..170659610	C4orf27 CLCN3 NEK1
rs1977199	chr6:26466389	A	0.97 (0.92-1.03)	1.09 (1.06-1.12)	1.07 (1.04-1.09)	0.3209	1.606e-11	9.733e-09	chr6:26393021..27070543	ABT1 BTN1A1 BTN2A1 BTN2A2 BTN2A3P BTN3A1 BTN3A3 GUSBP2 HCG11 HMGN4 LINC00240 LOC100270746 LOC285819 ZNF322
rs35131895	chr5:137748877	A	0.96 (0.91-1.01)	0.94 (0.91-0.96)	0.94 (0.92-0.96)	0.1152	2.402e-08	9.827e-09	chr5:137245295..137836622	BRD8 CDC23 CDC25C EGR1 FAM13B FAM53C GFRA3 KDM3B KIF20A NME5 PKD2L2 REEP2 WNT8A
rs1353545	chr3:60287845	C	1.05 (1.00-1.10)	1.06 (1.04-1.09)	1.06 (1.04-1.08)	0.07548	4.255e-08	1.105e-08	chr3:60276185..60305117	FHIT
rs145607970	chr6:32624017	A	1.02 (0.91-1.13)	0.85 (0.81-0.89)	0.88 (0.84-0.92)	0.773	1.345e-10	1.108e-08	chr6:32624017..32624017	NONE
rs115437294	chr6:31313042	A	0.99 (0.94-1.06)	1.09 (1.06-1.12)	1.08 (1.05-1.10)	0.8633	2.099e-10	1.177e-08	chr6:31236854..31319733	HLA-C
rs9274657	chr6:32636364	A	1.07 (1.01-1.13)	1.07 (1.04-1.10)	1.07 (1.04-1.09)	0.01885	1.864e-07	1.184e-08	chr6:32513587..32681992	HLA-DQA1 HLA-DQB1 HLA-DRB1 HLA-DRB6
rs10791111	chr11:130856099	T	1.02 (0.97-1.07)	1.07 (1.05-1.09)	1.06 (1.04-1.08)	0.4539	3.203e-09	1.201e-08	chr11:130786345..130894131	SNX19
rs35998080	chr1:73278615	T	1.00 (0.95-1.05)	1.07 (1.05-1.10)	1.06 (1.04-1.08)	0.8783	3.593e-10	1.25e-08	chr1:73141767..73846894	LINC01360
rs6803008	chr3:71571345	T	0.94 (0.90-0.99)	0.95 (0.93-0.97)	0.94 (0.93-0.96)	0.0127	3.288e-07	1.337e-08	chr3:71433554..71679148	FOXP1 MIR1284
rs115569272	chr6:32962882	A	0.99 (0.92-1.06)	0.90 (0.88-0.93)	0.92 (0.89-0.95)	0.7529	1.062e-09	1.415e-08	chr6:32957389..32962882	NONE
rs133047	chr22:41027819	T	1.01 (0.93-1.09)	1.12 (1.08-1.16)	1.10 (1.06-1.14)	0.9004	9.728e-10	1.454e-08	chr22:40818166..41397154	DNAJB7 LOC101927257 MCHR1 MIR4766 MKL1 RBX1 SLC25A17 ST13 XPNPEP3
rs116552815	chr6:30855907	A	0.97 (0.91-1.02)	0.92 (0.90-0.95)	0.93 (0.91-0.95)	0.251	1.018e-08	1.457e-08	chr6:30798473..30931245	DDR1 DPCR1 GTF2H4 MIR4640 SFTA2 VARS2
rs2944591	chr2:233794821	T	0.98 (0.93-1.04)	1.08 (1.05-1.10)	1.06 (1.04-1.09)	0.566	1.313e-10	1.471e-08	chr2:233562197..233807585	C2orf82 GIGYF2 KCNJ13 NGEF
rs10791097	chr11:130718630	T	0.96 (0.92-1.00)	1.08 (1.05-1.10)	1.06 (1.04-1.08)	0.07975	2.876e-12	1.493e-08	chr11:130706918..130877478	LOC100507431 LOC103611081 SNX19
rs7819570	chr8:89588626	T	1.04 (0.98-1.11)	1.08 (1.05-1.11)	1.07 (1.05-1.10)	0.2121	1.899e-08	1.566e-08	chr8:89269492..89761163	MMP16
rs2828478	chr21:25105211	A	1.07 (1.02-1.12)	1.06 (1.04-1.08)	1.06 (1.04-1.08)	0.009009	5.261e-07	1.633e-08	chr21:25092482..25219939	NONE
rs12443170	chr15:78907736	A	0.96 (0.89-1.04)	0.91 (0.88-0.94)	0.91 (0.89-0.94)	0.3361	1.043e-08	1.689e-08	chr15:78802586..78910267	CHRNA3 CHRNA5 HYKK PSMA4
rs9879311	chr3:10415343	T	1.08 (1.03-1.13)	1.05 (1.03-1.08)	1.06 (1.04-1.08)	0.001276	2.771e-06	1.879e-08	chr3:10317432..10520739	ATP2B2 GHRL GHRLOS LINC00852 MIR378B MIR885 SEC13 TATDN2
rs115136442	chr6:31054511	A	1.00 (0.95-1.05)	0.93 (0.91-0.95)	0.94 (0.92-0.96)	0.9663	8.954e-10	1.907e-08	chr6:31022158..31209389	C6orf15 CCHCR1 CDSN HCG22 HCG27 POU5F1 PSORS1C1 PSORS1C2 PSORS1C3 TCF19
rs112209031	chr6:32492407	T	1.02 (0.95-1.10)	1.11 (1.07-1.15)	1.09 (1.06-1.13)	0.6312	2.05e-09	1.915e-08	chr6:32468923..32589122	HLA-DRB1 HLA-DRB5 HLA-DRB6
rs114441450	chr6:30686814	T	0.96 (0.90-1.02)	0.92 (0.89-0.95)	0.92 (0.90-0.95)	0.1944	2.01e-08	1.97e-08	chr6:30686814..30686814	NONE
rs111977918	chr6:31236051	A	1.02 (0.97-1.07)	1.07 (1.05-1.10)	1.06 (1.04-1.09)	0.4549	6.476e-09	1.989e-08	chr6:31228410..31274752	HLA-C
rs2767713	chr9:84799537	A	0.98 (0.93-1.03)	0.93 (0.91-0.96)	0.94 (0.92-0.96)	0.3437	1.122e-08	2.003e-08	chr9:84511220..85126285	SPATA31D1 SPATA31D3 SPATA31D4 SPATA31D5P
rs8032315	chr15:91418297	A	1.00 (0.95-1.06)	0.93 (0.91-0.95)	0.94 (0.92-0.96)	0.9011	7.128e-10	2.134e-08	chr15:91391133..91443059	FES FURIN
rs138850297	chr6:32843721	C	0.96 (0.90-1.02)	0.93 (0.90-0.95)	0.93 (0.91-0.96)	0.1498	4.408e-08	2.183e-08	chr6:32805307..32893687	LOC100294145 PSMB8 PSMB8-AS1 PSMB9 TAP1 TAP2
rs114142645	chr6:31213583	T	1.01 (0.96-1.07)	1.08 (1.05-1.10)	1.06 (1.04-1.09)	0.7182	2.719e-09	2.245e-08	chr6:31122315..31221668	CCHCR1 HCG27 POU5F1 PSORS1C3 TCF19
rs146201420	chr6:31358397	T	1.03 (0.96-1.10)	0.90 (0.87-0.93)	0.92 (0.90-0.95)	0.376	5.031e-11	2.246e-08	chr6:31329386..31402837	MICA
rs7184114	chr16:58585369	A	0.94 (0.89-0.99)	0.95 (0.92-0.97)	0.94 (0.93-0.96)	0.0125	4.946e-07	2.259e-08	chr16:58549204..58682833	CNOT1 SETD6 SNORA46 SNORA76A
rs12522290	chr5:152797656	C	1.04 (0.98-1.11)	1.09 (1.05-1.12)	1.08 (1.05-1.11)	0.2314	2.227e-08	2.29e-08	chr5:152464813..152867348	NONE
rs184981897	chr6:32486966	A	1.00 (0.93-1.06)	0.91 (0.88-0.94)	0.92 (0.90-0.95)	0.903	1.27e-09	2.403e-08	chr6:32454899..32551938	HLA-DRB1 HLA-DRB5 HLA-DRB6
rs1339227	chr6:73155701	T	0.96 (0.91-1.01)	0.94 (0.92-0.96)	0.94 (0.93-0.96)	0.1221	6.86e-08	2.577e-08	chr6:73058954..73171881	RIMS1
rs149961934	chr6:32488769	C	1.00 (0.94-1.06)	0.92 (0.90-0.95)	0.93 (0.91-0.96)	0.8743	1.582e-09	2.593e-08	chr6:32454667..32598841	HLA-DRB1 HLA-DRB5 HLA-DRB6
rs427691	chr5:109014510	A	1.09 (1.03-1.15)	1.06 (1.03-1.09)	1.06 (1.04-1.09)	0.002107	2.47e-06	2.677e-08	chr5:108774456..109230885	LOC100289673 MAN2A1
rs28758902	chr18:53408187	T	0.98 (0.94-1.03)	1.07 (1.05-1.09)	1.06 (1.04-1.08)	0.5214	1.954e-10	2.746e-08	chr18:53195249..53477819	TCF4
rs2293751	chr6:31907837	A	1.06 (1.01-1.11)	1.06 (1.03-1.08)	1.06 (1.04-1.08)	0.02301	4.468e-07	2.833e-08	chr6:31826153..31945646	C2 C2-AS1 CFB DXO EHMT2 MIR1236 NELFE NEU1 SKIV2L SLC44A4 STK19 ZBTB12
rs188190243	chr6:32478584	A	1.03 (0.94-1.13)	0.88 (0.84-0.91)	0.90 (0.87-0.93)	0.5354	1.926e-10	2.843e-08	chr6:32478584..32478604	NONE
rs760648	chr22:42571028	A	1.02 (0.97-1.07)	1.07 (1.04-1.09)	1.06 (1.04-1.08)	0.5119	6.628e-09	2.936e-08	chr22:42364997..42689370	CYP2D6 CYP2D7 FAM109B LOC101929829 NAGA NDUFA6 NDUFA6-AS1 OGFRP1 SEPT3 SMDT1 TCF20 WBP2NL
rs73416724	chr6:43337802	A	1.11 (1.03-1.20)	1.09 (1.05-1.13)	1.09 (1.06-1.13)	0.005845	1.421e-06	3.012e-08	chr6:43234901..43411659	ABCC10 CRIP3 MIR6780B SLC22A7 TTBK1 ZNF318
rs146827975	chr6:32153409	A	0.92 (0.87-0.97)	0.94 (0.92-0.97)	0.94 (0.92-0.96)	0.002178	2.718e-06	3.053e-08	chr6:31603591..32331465	ABHD16A AGER AGPAT1 APOM ATF6B BAG6 C2 C2-AS1 C4A C4B C4B_2 C6orf10 C6orf25 C6orf47 C6orf48 CFB CLIC1 CSNK2B CYP21A1P CYP21A2 DDAH2 DXO EGFL8 EHMT2 FKBPL GPANK1 GPSM3 HSPA1A HSPA1B HSPA1L LOC100507547 LSM2 LY6G5B LY6G5C LY6G6C LY6G6D LY6G6E LY6G6F MIR1236 MIR4646 MIR6721 MIR6833 MSH5 MSH5-SAPCD1 NELFE NEU1 NOTCH4 PBX2 PPT2 PPT2-EGFL8 PRRC2A PRRT1 RNF5 RNF5P1 SAPCD1 SAPCD1-AS1 SKIV2L SLC44A4 SNORD…
rs61847307	chr10:53944442	T	0.95 (0.90-1.00)	0.94 (0.92-0.96)	0.94 (0.92-0.96)	0.05148	2.082e-07	3.118e-08	chr10:53935082..54035437	PRKG1
rs9656169	chr7:110074276	T	0.94 (0.90-0.99)	0.95 (0.93-0.97)	0.95 (0.93-0.96)	0.01313	7.036e-07	3.124e-08	chr7:110029087..110157254	NONE
rs182087722	chr6:28012083	A	1.00 (0.93-1.08)	1.11 (1.07-1.15)	1.09 (1.06-1.13)	0.8997	1.658e-09	3.172e-08	chr6:28004059..28173957	ZKSCAN8 ZNF165 ZNF192P1 ZSCAN12P1 ZSCAN16 ZSCAN16-AS1
rs114830752	chr6:32682812	A	1.05 (0.97-1.14)	0.89 (0.86-0.92)	0.92 (0.89-0.94)	0.1872	3.226e-11	3.192e-08	chr6:32666526..32682812	NONE
rs7432375	chr3:136288405	A	1.03 (0.98-1.08)	0.93 (0.91-0.95)	0.95 (0.93-0.97)	0.285	5.274e-11	3.332e-08	chr3:135623469..136760598	IL20RB MSL2 NCK1 NCK1-AS1 PCCB PPP2R3A SLC35G2 STAG1
rs115963308	chr6:32191041	A	1.00 (0.94-1.06)	0.92 (0.89-0.94)	0.93 (0.91-0.96)	0.9899	1.565e-09	3.363e-08	chr6:32191041..32191041	NOTCH4
rs36350	chr14:72387640	A	0.98 (0.93-1.03)	0.94 (0.92-0.96)	0.95 (0.93-0.97)	0.3514	2.066e-08	3.368e-08	chr14:72382471..72467631	RGS6
rs41294271	chr6:32543575	T	1.03 (0.95-1.12)	0.88 (0.84-0.91)	0.90 (0.87-0.94)	0.4444	7.678e-11	3.409e-08	chr6:32543570..32554283	HLA-DRB1
rs61884307	chr11:46755388	C	1.14 (1.05-1.24)	1.09 (1.05-1.13)	1.10 (1.06-1.13)	0.001664	3.635e-06	3.493e-08	chr11:46273962..47371598	ACP2 AMBRA1 ARFGAP2 ARHGAP1 ATG13 C11orf49 CHRM4 CKAP5 CREB3L1 DDB2 DGKZ F2 HARBI1 LOC101928943 LRP4 LRP4-AS1 MADD MDK MIR3160-1 MIR3160-2 MIR4688 MIR5582 MIR6745 MYBPC3 NR1H3 PACSIN3 SNORD67 ZNF408
rs7122181	chr11:81202910	A	0.95 (0.91-1.00)	0.95 (0.93-0.97)	0.95 (0.93-0.97)	0.04613	2.8e-07	3.702e-08	chr11:81178475..81209569	NONE
rs114277634	chr6:31442731	A	1.03 (0.98-1.08)	1.07 (1.04-1.09)	1.06 (1.04-1.08)	0.2911	2.654e-08	3.863e-08	chr6:31440497..31442731	NONE
rs353547	chr3:52268866	T	0.96 (0.92-1.01)	0.94 (0.92-0.96)	0.95 (0.93-0.97)	0.1065	1.179e-07	3.898e-08	chr3:52214640..52847601	ALAS1 BAP1 DNAH1 GLT8D1 GLYCTK GLYCTK-AS1 GNL3 ITIH1 ITIH3 ITIH4 MIR135A1 MIRLET7G NEK4 NISCH NT5DC2 PBRM1 PHF7 PPM1M SEMA3G SMIM4 SNORD136 SNORD19 SNORD19B SNORD69 SPCS1 STAB1 TLR9 TNNC1 TWF2 WDR82
rs114875775	chr6:32489032	A	1.00 (0.90-1.10)	1.15 (1.10-1.21)	1.13 (1.08-1.17)	0.9269	1.259e-09	4.004e-08	chr6:32489032..32489032	HLA-DRB5
rs221902	chr14:71601079	T	0.95 (0.91-1.00)	0.95 (0.92-0.97)	0.95 (0.93-0.96)	0.03944	3.172e-07	4.122e-08	chr14:71350617..71637195	PCNX
rs2115780	chr3:53142980	A	1.06 (1.01-1.11)	1.06 (1.04-1.08)	1.06 (1.04-1.08)	0.02522	5.794e-07	4.13e-08	chr3:52848896..53170945	ITIH4 ITIH4-AS1 MIR8064 MUSTN1 RFT1 SFMBT1 TMEM110 TMEM110-MUSTN1
rs140849564	chr6:32490607	A	1.00 (0.94-1.06)	1.09 (1.06-1.12)	1.07 (1.05-1.10)	0.9463	1.068e-09	4.21e-08	chr6:32486299..32490607	HLA-DRB5
rs76994193	chr5:88427337	A	1.10 (1.02-1.18)	1.09 (1.05-1.12)	1.09 (1.06-1.12)	0.01238	1.067e-06	4.343e-08	chr5:88257611..88854539	MEF2C-AS1
rs880446	chr20:62133177	A	1.07 (1.02-1.13)	1.06 (1.04-1.09)	1.06 (1.04-1.09)	0.007833	1.646e-06	4.359e-08	chr20:62113220..62178105	EEF1A2 PPDPF PTK6 SRMS
rs7837860	chr8:89334260	T	0.95 (0.90-1.00)	0.93 (0.91-0.96)	0.94 (0.92-0.96)	0.06688	2.134e-07	4.515e-08	chr8:89222426..89640705	MMP16
rs9292918	chr5:45301035	T	0.98 (0.92-1.03)	0.93 (0.90-0.95)	0.94 (0.91-0.96)	0.4429	1.471e-08	4.532e-08	chr5:44960923..46300859	HCN1
rs9368481	chr6:26961761	T	1.02 (0.97-1.07)	0.93 (0.91-0.95)	0.94 (0.92-0.96)	0.5327	3.157e-10	4.547e-08	chr6:26553273..27145311	ABT1 GUSBP2 HIST1H2AG HIST1H2AH HIST1H2BJ HIST1H2BK HIST1H4I LINC00240 LOC100270746 MIR3143 ZNF322
rs7129727	chr11:57484660	A	1.04 (0.99-1.10)	1.06 (1.04-1.09)	1.06 (1.04-1.08)	0.1373	1.144e-07	4.641e-08	chr11:57369008..57752003	BTBD18 C11orf31 CLP1 CTNND1 MED19 MIR130A SERPING1 TMX2 TMX2-CTNND1 YPEL4 ZDHHC5
rs7521492	chr1:163727923	A	1.05 (1.00-1.10)	1.06 (1.03-1.08)	1.06 (1.04-1.08)	0.03056	5.641e-07	4.646e-08	chr1:163581663..163790947	NONE
rs72986630	chr19:11849736	T	1.07 (0.95-1.21)	1.16 (1.10-1.22)	1.14 (1.09-1.20)	0.2459	4.636e-08	4.664e-08	chr19:11849736..11943697	ZNF440 ZNF441 ZNF491 ZNF823
rs78696503	chr2:200059212	A	0.90 (0.84-0.96)	0.93 (0.90-0.96)	0.93 (0.90-0.95)	0.001599	4.879e-06	4.671e-08	chr2:199853743..200307014	SATB2
rs190065944	chr15:78859610	A	1.04 (0.98-1.11)	1.08 (1.05-1.11)	1.07 (1.05-1.10)	0.1876	7.221e-08	4.721e-08	chr15:78719832..78936168	CHRNA3 CHRNA5 CHRNB4 HYKK IREB2 PSMA4
rs148820910	chr6:33311179	A	0.94 (0.90-0.99)	0.94 (0.92-0.97)	0.94 (0.93-0.96)	0.02559	6.119e-07	4.784e-08	chr6:33206212..33444074	B3GALT4 CUTA DAXX HCG25 KIFC1 MIR1234 MIR5004 MIR6834 MIR6873 PFDN6 PHF1 RGL2 RPS18 SYNGAP1 TAPBP VPS52 WDR46 ZBTB22 ZBTB9
rs4904167	chr14:84700744	T	1.08 (1.03-1.14)	1.05 (1.03-1.07)	1.06 (1.04-1.08)	0.001376	5.192e-06	4.853e-08	chr14:84628384..84701798	NONE
rs7752643	chr6:84280275	C	0.99 (0.95-1.04)	1.07 (1.05-1.09)	1.06 (1.03-1.08)	0.8247	1.357e-09	4.951e-08	chr6:84223563..84407501	PRSS35 SNAP91
